# Supplementary material for: Potential Mechanism of Dingji Fumai Decoction Against Atrial Fibrillation Based on Network Pharmacology, Molecular Docking, and Experimental Verification Integration Strategy
Source: PubMed Central journal article supplement (PMC8631917; doi:10.3389/fcvm.2021.712398), 2021-11-11
Supplement: Table_2.pdf [file Table_2.pdf]

Table S2. The Correspondence information between compounds and targets.

| PubChem ID | Compound  | Target  |
|------------|-----------|---------|
| 5280343    | Quercetin | ABCB1   |
| 5280343    | Quercetin | ABCC1   |
| 5280343    | Quercetin | ABCG2   |
| 5280343    | Quercetin | ACHE    |
| 5280343    | Quercetin | ADORA1  |
| 5280343    | Quercetin | ADORA2A |
| 5280343    | Quercetin | AHR     |
| 5280343    | Quercetin | AKR1A1  |
| 5280343    | Quercetin | AKR1B1  |
| 5280343    | Quercetin | AKR1B10 |
| 5280343    | Quercetin | AKR1C1  |
| 5280343    | Quercetin | AKR1C2  |
| 5280343    | Quercetin | AKR1C3  |
| 5280343    | Quercetin | AKR1C4  |
| 5280343    | Quercetin | AKT1    |
| 5280343    | Quercetin | ALK     |
| 5280343    | Quercetin | ALOX12  |
| 5280343    | Quercetin | ALOX15  |
| 5280343    | Quercetin | ALOX5   |
| 5280343    | Quercetin | APEX1   |
| 5280343    | Quercetin | APP     |
| 5280343    | Quercetin | ARG1    |
| 5280343    | Quercetin | AURKB   |
| 5280343    | Quercetin | AVPR2   |
| 5280343    | Quercetin | AXL     |
| 5280343    | Quercetin | BACE1   |
| 5280343    | Quercetin | CA1     |
| 5280343    | Quercetin | CA12    |
| 5280343    | Quercetin | CA13    |
| 5280343    | Quercetin | CA14    |
| 5280343    | Quercetin | CA2     |
| 5280343    | Quercetin | CA3     |
| 5280343    | Quercetin | CA4     |
| 5280343    | Quercetin | CA5A    |
| 5280343    | Quercetin | CA6     |
| 5280343    | Quercetin | CA7     |
| 5280343    | Quercetin | CA9     |
| 5280343    | Quercetin | CAMK2B  |
| 5280343    | Quercetin | CCNB1   |
| 5280343    | Quercetin | CCNB2   |
| 5280343    | Quercetin | CCNB3   |
| 5280343    | Quercetin | CD38    |

|         |           |         |
|---------|-----------|---------|
| 5280343 | Quercetin | CDK1    |
| 5280343 | Quercetin | CDK2    |
| 5280343 | Quercetin | CDK5    |
| 5280343 | Quercetin | CDK5R1  |
| 5280343 | Quercetin | CDK6    |
| 5280343 | Quercetin | CSNK2A1 |
| 5280343 | Quercetin | CXCR1   |
| 5280343 | Quercetin | CYP19A1 |
| 5280343 | Quercetin | CYP1B1  |
| 5280343 | Quercetin | DAPK1   |
| 5280343 | Quercetin | DRD4    |
| 5280343 | Quercetin | EGFR    |
| 5280343 | Quercetin | ESR2    |
| 5280343 | Quercetin | ESRRA   |
| 5280343 | Quercetin | F2      |
| 5280343 | Quercetin | FLT3    |
| 5280343 | Quercetin | GLO1    |
| 5280343 | Quercetin | GPR35   |
| 5280343 | Quercetin | GSK3B   |
| 5280343 | Quercetin | HSD17B1 |
| 5280343 | Quercetin | HSD17B2 |
| 5280343 | Quercetin | IGF1R   |
| 5280343 | Quercetin | INSR    |
| 5280343 | Quercetin | KDM4E   |
| 5280343 | Quercetin | KDR     |
| 5280343 | Quercetin | MAOA    |
| 5280343 | Quercetin | MAPT    |
| 5280343 | Quercetin | MET     |
| 5280343 | Quercetin | MMP12   |
| 5280343 | Quercetin | MMP13   |
| 5280343 | Quercetin | MMP2    |
| 5280343 | Quercetin | MMP3    |
| 5280343 | Quercetin | MMP9    |
| 5280343 | Quercetin | MPG     |
| 5280343 | Quercetin | MPO     |
| 5280343 | Quercetin | MYLK    |
| 5280343 | Quercetin | NEK2    |
| 5280343 | Quercetin | NEK6    |
| 5280343 | Quercetin | NOX4    |
| 5280343 | Quercetin | NUAK1   |
| 5280343 | Quercetin | PARP1   |
| 5280343 | Quercetin | PIK3CG  |
| 5280343 | Quercetin | PIK3R1  |
| 5280343 | Quercetin | PIM1    |

|         |                     |          |
|---------|---------------------|----------|
| 5280343 | Quercetin           | PKN1     |
| 5280343 | Quercetin           | PLA2G1B  |
| 5280343 | Quercetin           | PLK1     |
| 5280343 | Quercetin           | PTK2     |
| 5280343 | Quercetin           | PTPRS    |
| 5280343 | Quercetin           | PYGL     |
| 5280343 | Quercetin           | SLC22A12 |
| 5280343 | Quercetin           | SRC      |
| 5280343 | Quercetin           | SYK      |
| 5280343 | Quercetin           | TERT     |
| 5280343 | Quercetin           | TNKS     |
| 5280343 | Quercetin           | TNKS2    |
| 5280343 | Quercetin           | TOP1     |
| 5280343 | Quercetin           | TOP2A    |
| 5280343 | Quercetin           | TTR      |
| 5280343 | Quercetin           | TYR      |
| 5280343 | Quercetin           | XDH      |
| 72      | Protocatechuic Acid | AKR1C3   |
| 72      | Protocatechuic Acid | ALB      |
| 72      | Protocatechuic Acid | ALK      |
| 72      | Protocatechuic Acid | BCL2L1   |
| 72      | Protocatechuic Acid | CA1      |
| 72      | Protocatechuic Acid | CA12     |
| 72      | Protocatechuic Acid | CA13     |
| 72      | Protocatechuic Acid | CA14     |
| 72      | Protocatechuic Acid | CA2      |
| 72      | Protocatechuic Acid | CA3      |
| 72      | Protocatechuic Acid | CA4      |
| 72      | Protocatechuic Acid | CA5A     |
| 72      | Protocatechuic Acid | CA5B     |
| 72      | Protocatechuic Acid | CA6      |
| 72      | Protocatechuic Acid | CA7      |
| 72      | Protocatechuic Acid | CA9      |
| 72      | Protocatechuic Acid | COMT     |
| 72      | Protocatechuic Acid | ESR2     |
| 72      | Protocatechuic Acid | FUT7     |
| 72      | Protocatechuic Acid | GPR35    |
| 72      | Protocatechuic Acid | IGF1R    |
| 72      | Protocatechuic Acid | LDHA     |
| 72      | Protocatechuic Acid | LDHB     |
| 72      | Protocatechuic Acid | SERPINE1 |
| 72      | Protocatechuic Acid | SQLE     |
| 72      | Protocatechuic Acid | TTR      |
| 985     | Cetylic Acid        | ABCB1    |

|     |              |          |
|-----|--------------|----------|
| 985 | Cetylic Acid | ABCB1    |
| 985 | Cetylic Acid | ABCC1    |
| 985 | Cetylic Acid | AKR1B10  |
| 985 | Cetylic Acid | ALOX12   |
| 985 | Cetylic Acid | ALOX15   |
| 985 | Cetylic Acid | AR       |
| 985 | Cetylic Acid | CA1      |
| 985 | Cetylic Acid | CA2      |
| 985 | Cetylic Acid | CACNA2D1 |
| 985 | Cetylic Acid | CDC25A   |
| 985 | Cetylic Acid | CDC45    |
| 985 | Cetylic Acid | CHRNA7   |
| 985 | Cetylic Acid | CYP19A1  |
| 985 | Cetylic Acid | CYP26A1  |
| 985 | Cetylic Acid | CYP26B1  |
| 985 | Cetylic Acid | EPHX2    |
| 985 | Cetylic Acid | FAAH     |
| 985 | Cetylic Acid | FABP1    |
| 985 | Cetylic Acid | FABP2    |
| 985 | Cetylic Acid | FABP3    |
| 985 | Cetylic Acid | FABP4    |
| 985 | Cetylic Acid | FABP5    |
| 985 | Cetylic Acid | FFAR1    |
| 985 | Cetylic Acid | FFAR4    |
| 985 | Cetylic Acid | FNTA     |
| 985 | Cetylic Acid | FNTB     |
| 985 | Cetylic Acid | G6PD     |
| 985 | Cetylic Acid | GABBR1   |
| 985 | Cetylic Acid | GABRA2   |
| 985 | Cetylic Acid | GABRB2   |
| 985 | Cetylic Acid | GABRG2   |
| 985 | Cetylic Acid | GLRA1    |
| 985 | Cetylic Acid | GPBAR1   |
| 985 | Cetylic Acid | GRM5     |
| 985 | Cetylic Acid | GSTK1    |
| 985 | Cetylic Acid | HAO1     |
| 985 | Cetylic Acid | HMGCR    |
| 985 | Cetylic Acid | HNF4A    |
| 985 | Cetylic Acid | HSD11B1  |
| 985 | Cetylic Acid | HSD11B2  |
| 985 | Cetylic Acid | HSD17B3  |
| 985 | Cetylic Acid | HTR2B    |
| 985 | Cetylic Acid | KDM2A    |
| 985 | Cetylic Acid | KDM5C    |

|        |              |          |
|--------|--------------|----------|
| 985    | Cetylic Acid | LTA4H    |
| 985    | Cetylic Acid | MAPK1    |
| 985    | Cetylic Acid | NPC1L1   |
| 985    | Cetylic Acid | NR0B2    |
| 985    | Cetylic Acid | NR1H4    |
| 985    | Cetylic Acid | PHF8     |
| 985    | Cetylic Acid | PLA2G4A  |
| 985    | Cetylic Acid | PLG      |
| 985    | Cetylic Acid | POLB     |
| 985    | Cetylic Acid | PPARA    |
| 985    | Cetylic Acid | PPARD    |
| 985    | Cetylic Acid | PPARG    |
| 985    | Cetylic Acid | PTGER2   |
| 985    | Cetylic Acid | PTGER4   |
| 985    | Cetylic Acid | PTGES    |
| 985    | Cetylic Acid | PTGFR    |
| 985    | Cetylic Acid | PTPN1    |
| 985    | Cetylic Acid | PTPRC    |
| 985    | Cetylic Acid | RARA     |
| 985    | Cetylic Acid | RARB     |
| 985    | Cetylic Acid | RARG     |
| 985    | Cetylic Acid | RORA     |
| 985    | Cetylic Acid | RORB     |
| 985    | Cetylic Acid | RXRA     |
| 985    | Cetylic Acid | RXRB     |
| 985    | Cetylic Acid | RXRG     |
| 985    | Cetylic Acid | SAE1     |
| 985    | Cetylic Acid | SCD      |
| 985    | Cetylic Acid | SERPINA6 |
| 985    | Cetylic Acid | SHBG     |
| 985    | Cetylic Acid | SLC16A1  |
| 985    | Cetylic Acid | SLC22A6  |
| 985    | Cetylic Acid | TBXA2R   |
| 985    | Cetylic Acid | TERT     |
| 985    | Cetylic Acid | UBA2     |
| 985    | Cetylic Acid | UGT2B7   |
| 985    | Cetylic Acid | VDR      |
| 689043 | Caffeic Acid | AKR1B1   |
| 689043 | Caffeic Acid | AKR1B10  |
| 689043 | Caffeic Acid | AKR1C2   |
| 689043 | Caffeic Acid | AKR1C3   |
| 689043 | Caffeic Acid | AKR1C4   |
| 689043 | Caffeic Acid | ALOX5    |
| 689043 | Caffeic Acid | APP      |

|         |                |         |
|---------|----------------|---------|
| 689043  | Caffeic Acid   | CA1     |
| 689043  | Caffeic Acid   | CA12    |
| 689043  | Caffeic Acid   | CA13    |
| 689043  | Caffeic Acid   | CA14    |
| 689043  | Caffeic Acid   | CA2     |
| 689043  | Caffeic Acid   | CA3     |
| 689043  | Caffeic Acid   | CA4     |
| 689043  | Caffeic Acid   | CA5A    |
| 689043  | Caffeic Acid   | CA5B    |
| 689043  | Caffeic Acid   | CA6     |
| 689043  | Caffeic Acid   | CA7     |
| 689043  | Caffeic Acid   | CA9     |
| 689043  | Caffeic Acid   | CYP1A2  |
| 689043  | Caffeic Acid   | CYP2C19 |
| 689043  | Caffeic Acid   | CYP2C9  |
| 689043  | Caffeic Acid   | CYP3A4  |
| 689043  | Caffeic Acid   | EGFR    |
| 689043  | Caffeic Acid   | ELANE   |
| 689043  | Caffeic Acid   | ERBB2   |
| 689043  | Caffeic Acid   | ESR1    |
| 689043  | Caffeic Acid   | ESR2    |
| 689043  | Caffeic Acid   | F3      |
| 689043  | Caffeic Acid   | FYN     |
| 689043  | Caffeic Acid   | HCAR2   |
| 689043  | Caffeic Acid   | HSD11B1 |
| 689043  | Caffeic Acid   | LCK     |
| 689043  | Caffeic Acid   | MAOB    |
| 689043  | Caffeic Acid   | MAPK1   |
| 689043  | Caffeic Acid   | MIF     |
| 689043  | Caffeic Acid   | MMP1    |
| 689043  | Caffeic Acid   | MMP2    |
| 689043  | Caffeic Acid   | MMP9    |
| 689043  | Caffeic Acid   | NFE2L2  |
| 689043  | Caffeic Acid   | NQO2    |
| 689043  | Caffeic Acid   | PIK3CA  |
| 689043  | Caffeic Acid   | PIK3CB  |
| 689043  | Caffeic Acid   | PTGS1   |
| 689043  | Caffeic Acid   | PTPN1   |
| 689043  | Caffeic Acid   | SLC6A2  |
| 689043  | Caffeic Acid   | STAT3   |
| 689043  | Caffeic Acid   | SYK     |
| 689043  | Caffeic Acid   | TLR4    |
| 689043  | Caffeic Acid   | TTR     |
| 5321250 | Senkyunolide G | ADAMTS4 |

|         |                |         |
|---------|----------------|---------|
| 5321250 | Senkyunolide G | ADAMTS5 |
| 5321250 | Senkyunolide G | ADORA2A |
| 5321250 | Senkyunolide G | ADORA2B |
| 5321250 | Senkyunolide G | ADORA3  |
| 5321250 | Senkyunolide G | ADRA2A  |
| 5321250 | Senkyunolide G | ADRA2B  |
| 5321250 | Senkyunolide G | ADRA2C  |
| 5321250 | Senkyunolide G | CCNB1   |
| 5321250 | Senkyunolide G | CCNB3   |
| 5321250 | Senkyunolide G | CCNE1   |
| 5321250 | Senkyunolide G | CCNE2   |
| 5321250 | Senkyunolide G | CDK1    |
| 5321250 | Senkyunolide G | CDK2    |
| 5321250 | Senkyunolide G | CDK5    |
| 5321250 | Senkyunolide G | CDK5R1  |
| 5321250 | Senkyunolide G | CHRM2   |
| 5321250 | Senkyunolide G | CHRM4   |
| 5321250 | Senkyunolide G | DCTPP1  |
| 5321250 | Senkyunolide G | DYRK1A  |
| 5321250 | Senkyunolide G | EPHX1   |
| 5321250 | Senkyunolide G | FADS1   |
| 5321250 | Senkyunolide G | FGFR1   |
| 5321250 | Senkyunolide G | GRM4    |
| 5321250 | Senkyunolide G | HCRTR1  |
| 5321250 | Senkyunolide G | HCRTR2  |
| 5321250 | Senkyunolide G | HMOX1   |
| 5321250 | Senkyunolide G | HRH3    |
| 5321250 | Senkyunolide G | HRH4    |
| 5321250 | Senkyunolide G | IGF1R   |
| 5321250 | Senkyunolide G | IMPDH2  |
| 5321250 | Senkyunolide G | INSR    |
| 5321250 | Senkyunolide G | JUN     |
| 5321250 | Senkyunolide G | KCNA5   |
| 5321250 | Senkyunolide G | KDR     |
| 5321250 | Senkyunolide G | LRRK2   |
| 5321250 | Senkyunolide G | MAPK1   |
| 5321250 | Senkyunolide G | MAPK10  |
| 5321250 | Senkyunolide G | MAPK14  |
| 5321250 | Senkyunolide G | MAPK8   |
| 5321250 | Senkyunolide G | MDM2    |
| 5321250 | Senkyunolide G | MTNR1A  |
| 5321250 | Senkyunolide G | MTNR1B  |
| 5321250 | Senkyunolide G | NT5E    |
| 5321250 | Senkyunolide G | NTRK1   |

|          |                |         |
|----------|----------------|---------|
| 5321250  | Senkyunolide G | P2RX7   |
| 5321250  | Senkyunolide G | PARP1   |
| 5321250  | Senkyunolide G | PLA2G1B |
| 5321250  | Senkyunolide G | PLA2G2A |
| 5321250  | Senkyunolide G | PTK2B   |
| 5321250  | Senkyunolide G | RIPK2   |
| 5321250  | Senkyunolide G | SIGMAR1 |
| 5321250  | Senkyunolide G | SLC6A4  |
| 5321250  | Senkyunolide G | STK26   |
| 5321250  | Senkyunolide G | STK3    |
| 5321250  | Senkyunolide G | TNNT2   |
| 5321250  | Senkyunolide G | TRPV3   |
| 5321250  | Senkyunolide G | TTL     |
| 91726743 | Senkyunone     | ABCB1   |
| 91726743 | Senkyunone     | ABCC1   |
| 91726743 | Senkyunone     | ACACA   |
| 91726743 | Senkyunone     | ACACB   |
| 91726743 | Senkyunone     | ALOX5   |
| 91726743 | Senkyunone     | C3AR1   |
| 91726743 | Senkyunone     | CALCRL  |
| 91726743 | Senkyunone     | CALCRL  |
| 91726743 | Senkyunone     | CCKBR   |
| 91726743 | Senkyunone     | CFTR    |
| 91726743 | Senkyunone     | CRHR1   |
| 91726743 | Senkyunone     | CTSK    |
| 91726743 | Senkyunone     | CTSL    |
| 91726743 | Senkyunone     | CTSS    |
| 91726743 | Senkyunone     | CYP19A1 |
| 91726743 | Senkyunone     | CYP24A1 |
| 91726743 | Senkyunone     | CYP27A1 |
| 91726743 | Senkyunone     | DGAT2   |
| 91726743 | Senkyunone     | DKK1    |
| 91726743 | Senkyunone     | DRD2    |
| 91726743 | Senkyunone     | DRD3    |
| 91726743 | Senkyunone     | DRD4    |
| 91726743 | Senkyunone     | EPHX2   |
| 91726743 | Senkyunone     | F10     |
| 91726743 | Senkyunone     | F13A1   |
| 91726743 | Senkyunone     | F2R     |
| 91726743 | Senkyunone     | FASN    |
| 91726743 | Senkyunone     | GLI2    |
| 91726743 | Senkyunone     | GPR183  |
| 91726743 | Senkyunone     | GPR88   |
| 91726743 | Senkyunone     | GRM2    |



|          |            |         |
|----------|------------|---------|
| 91726743 | Senkyunone | GRM5    |
| 91726743 | Senkyunone | HCRTR1  |
| 91726743 | Senkyunone | HCRTR2  |
| 91726743 | Senkyunone | HPGDS   |
| 91726743 | Senkyunone | HRH1    |
| 91726743 | Senkyunone | HSD17B2 |
| 91726743 | Senkyunone | HTR1A   |
| 91726743 | Senkyunone | HTR2A   |
| 91726743 | Senkyunone | HTR2C   |
| 91726743 | Senkyunone | HTR7    |
| 91726743 | Senkyunone | ICAM1   |
| 91726743 | Senkyunone | IMPDH2  |
| 91726743 | Senkyunone | ITK     |
| 91726743 | Senkyunone | KCNA5   |
| 91726743 | Senkyunone | KCNH2   |
| 91726743 | Senkyunone | KDR     |
| 91726743 | Senkyunone | KIF11   |
| 91726743 | Senkyunone | KNG1    |
| 91726743 | Senkyunone | LSS     |
| 91726743 | Senkyunone | LYPLA2  |
| 91726743 | Senkyunone | MAOB    |
| 91726743 | Senkyunone | MAPK10  |
| 91726743 | Senkyunone | MAPK11  |
| 91726743 | Senkyunone | MAPK14  |
| 91726743 | Senkyunone | MDM2    |
| 91726743 | Senkyunone | MGAT2   |
| 91726743 | Senkyunone | MTNR1A  |
| 91726743 | Senkyunone | MTNR1B  |
| 91726743 | Senkyunone | NPY5R   |
| 91726743 | Senkyunone | NR3C1   |
| 91726743 | Senkyunone | OPRD1   |
| 91726743 | Senkyunone | PARP1   |
| 91726743 | Senkyunone | PDE10A  |
| 91726743 | Senkyunone | PDE4B   |
| 91726743 | Senkyunone | PDE7A   |
| 91726743 | Senkyunone | PFKFB3  |
| 91726743 | Senkyunone | PLK1    |
| 91726743 | Senkyunone | POLH    |
| 91726743 | Senkyunone | POLK    |
| 91726743 | Senkyunone | POLL    |
| 91726743 | Senkyunone | POLM    |
| 91726743 | Senkyunone | PTGER4  |
| 91726743 | Senkyunone | PTGS2   |
| 91726743 | Senkyunone | RAMP1   |

|          |             |         |
|----------|-------------|---------|
| 91726743 | Senkyunone  | RORB    |
| 91726743 | Senkyunone  | SCARB1  |
| 91726743 | Senkyunone  | SCD     |
| 91726743 | Senkyunone  | SCN5A   |
| 91726743 | Senkyunone  | SCN9A   |
| 91726743 | Senkyunone  | SELE    |
| 91726743 | Senkyunone  | SLC5A1  |
| 91726743 | Senkyunone  | SMO     |
| 91726743 | Senkyunone  | SOAT1   |
| 91726743 | Senkyunone  | SRC     |
| 91726743 | Senkyunone  | SYK     |
| 91726743 | Senkyunone  | TEK     |
| 91726743 | Senkyunone  | TGM1    |
| 91726743 | Senkyunone  | TGM2    |
| 91726743 | Senkyunone  | THRA    |
| 91726743 | Senkyunone  | THRB    |
| 91726743 | Senkyunone  | TRPV1   |
| 91726743 | Senkyunone  | UTS2R   |
| 92231    | Spathulenol | HSD11B1 |
| 92231    | Spathulenol | ICMT    |
| 92231    | Spathulenol | IDO1    |
| 92231    | Spathulenol | NR1H3   |
| 92231    | Spathulenol | PGR     |
| 92231    | Spathulenol | PTGS1   |
| 92231    | Spathulenol | UGT2B7  |
| 1174     | Uracil      | DPYD    |
| 1174     | Uracil      | PARP1   |
| 1174     | Uracil      | TYMS    |
| 1183     | Vanillin    | ALPG    |
| 1183     | Vanillin    | CA1     |
| 1183     | Vanillin    | CA12    |
| 1183     | Vanillin    | CA14    |
| 1183     | Vanillin    | CA2     |
| 1183     | Vanillin    | CA3     |
| 1183     | Vanillin    | CA4     |
| 1183     | Vanillin    | CA5A    |
| 1183     | Vanillin    | CA6     |
| 1183     | Vanillin    | CA7     |
| 1183     | Vanillin    | CA9     |
| 1183     | Vanillin    | CDC25B  |
| 1183     | Vanillin    | EP300   |
| 1183     | Vanillin    | ERN1    |
| 1183     | Vanillin    | NAT1    |
| 1183     | Vanillin    | PLAA    |

|        |                   |          |
|--------|-------------------|----------|
| 1183   | Vanillin          | PTPRC    |
| 1183   | Vanillin          | TTR      |
| 122736 | Wallichilide      | ATP12A   |
| 122736 | Wallichilide      | ATP1A1   |
| 122736 | Wallichilide      | BCL2L1   |
| 122736 | Wallichilide      | CCR5     |
| 122736 | Wallichilide      | F2RL1    |
| 122736 | Wallichilide      | GIPR     |
| 122736 | Wallichilide      | GLP1R    |
| 122736 | Wallichilide      | GLRA1    |
| 122736 | Wallichilide      | GLRA2    |
| 122736 | Wallichilide      | IARS     |
| 122736 | Wallichilide      | LTB4R    |
| 122736 | Wallichilide      | PDE5A    |
| 122736 | Wallichilide      | PRKCB    |
| 122736 | Wallichilide      | PRKCE    |
| 122736 | Wallichilide      | PRKCH    |
| 122736 | Wallichilide      | PRKCQ    |
| 122736 | Wallichilide      | PTGER1   |
| 122736 | Wallichilide      | PTGER3   |
| 122736 | Wallichilide      | PTGFR    |
| 122736 | Wallichilide      | PTGS2    |
| 122736 | Wallichilide      | PTPA     |
| 122736 | Wallichilide      | RORC     |
| 122736 | Wallichilide      | STAT3    |
| 10288  | Chrysophanic Acid | ABL1     |
| 10288  | Chrysophanic Acid | ACHE     |
| 10288  | Chrysophanic Acid | CDC7     |
| 10288  | Chrysophanic Acid | CDK1     |
| 10288  | Chrysophanic Acid | CDK2     |
| 10288  | Chrysophanic Acid | CHEK1    |
| 10288  | Chrysophanic Acid | CXCR1    |
| 10288  | Chrysophanic Acid | CXCR2    |
| 10288  | Chrysophanic Acid | DAO      |
| 10288  | Chrysophanic Acid | ESR1     |
| 10288  | Chrysophanic Acid | ESR2     |
| 10288  | Chrysophanic Acid | FADS1    |
| 10288  | Chrysophanic Acid | GPR84    |
| 10288  | Chrysophanic Acid | GSTA1    |
| 10288  | Chrysophanic Acid | HDAC1    |
| 10288  | Chrysophanic Acid | HSP90AA1 |
| 10288  | Chrysophanic Acid | HSP90AB1 |
| 10288  | Chrysophanic Acid | KCNMA1   |
| 10288  | Chrysophanic Acid | MB       |

|       |                   |         |
|-------|-------------------|---------|
| 10288 | Chrysophanic Acid | MCL1    |
| 10288 | Chrysophanic Acid | NOX4    |
| 10288 | Chrysophanic Acid | SRC     |
| 10288 | Chrysophanic Acid | UPP1    |
| 10208 | Chrysophanol      | ABL1    |
| 10208 | Chrysophanol      | ACE     |
| 10208 | Chrysophanol      | ADAM17  |
| 10208 | Chrysophanol      | ADORA2B |
| 10208 | Chrysophanol      | ADRA1A  |
| 10208 | Chrysophanol      | ADRA2A  |
| 10208 | Chrysophanol      | ADRA2B  |
| 10208 | Chrysophanol      | ALPG    |
| 10208 | Chrysophanol      | ALPL    |
| 10208 | Chrysophanol      | ASF1A   |
| 10208 | Chrysophanol      | BACE1   |
| 10208 | Chrysophanol      | BCL2    |
| 10208 | Chrysophanol      | CA14    |
| 10208 | Chrysophanol      | CA7     |
| 10208 | Chrysophanol      | CHEK1   |
| 10208 | Chrysophanol      | CISD1   |
| 10208 | Chrysophanol      | CSNK1A1 |
| 10208 | Chrysophanol      | CSNK1D  |
| 10208 | Chrysophanol      | CSNK2A1 |
| 10208 | Chrysophanol      | CTSV    |
| 10208 | Chrysophanol      | CYP19A1 |
| 10208 | Chrysophanol      | DAO     |
| 10208 | Chrysophanol      | DUSP3   |
| 10208 | Chrysophanol      | EGFR    |
| 10208 | Chrysophanol      | EIF2AK2 |
| 10208 | Chrysophanol      | ELANE   |
| 10208 | Chrysophanol      | ERN1    |
| 10208 | Chrysophanol      | ESR1    |
| 10208 | Chrysophanol      | ESR2    |
| 10208 | Chrysophanol      | FGFR1   |
| 10208 | Chrysophanol      | FLT1    |
| 10208 | Chrysophanol      | FNTA    |
| 10208 | Chrysophanol      | FNTB    |
| 10208 | Chrysophanol      | FTO     |
| 10208 | Chrysophanol      | GRM5    |
| 10208 | Chrysophanol      | GUSB    |
| 10208 | Chrysophanol      | HCK     |
| 10208 | Chrysophanol      | HDAC1   |
| 10208 | Chrysophanol      | HDAC4   |
| 10208 | Chrysophanol      | HDAC5   |

|       |              |          |
|-------|--------------|----------|
| 10208 | Chrysophanol | HDAC6    |
| 10208 | Chrysophanol | HDAC7    |
| 10208 | Chrysophanol | HDAC8    |
| 10208 | Chrysophanol | HMGCR    |
| 10208 | Chrysophanol | HSD11B1  |
| 10208 | Chrysophanol | HSP90AA1 |
| 10208 | Chrysophanol | HSP90AB1 |
| 10208 | Chrysophanol | HTR2B    |
| 10208 | Chrysophanol | KDR      |
| 10208 | Chrysophanol | LCK      |
| 10208 | Chrysophanol | LDHA     |
| 10208 | Chrysophanol | LDHB     |
| 10208 | Chrysophanol | MAOB     |
| 10208 | Chrysophanol | MAP2K1   |
| 10208 | Chrysophanol | MCL1     |
| 10208 | Chrysophanol | MMP1     |
| 10208 | Chrysophanol | MMP12    |
| 10208 | Chrysophanol | MMP13    |
| 10208 | Chrysophanol | MMP14    |
| 10208 | Chrysophanol | MMP16    |
| 10208 | Chrysophanol | MMP2     |
| 10208 | Chrysophanol | MMP3     |
| 10208 | Chrysophanol | MMP7     |
| 10208 | Chrysophanol | MMP8     |
| 10208 | Chrysophanol | MMP9     |
| 10208 | Chrysophanol | MTOR     |
| 10208 | Chrysophanol | NAT1     |
| 10208 | Chrysophanol | NISCH    |
| 10208 | Chrysophanol | NOS2     |
| 10208 | Chrysophanol | NOX4     |
| 10208 | Chrysophanol | PI4KB    |
| 10208 | Chrysophanol | PIK3CA   |
| 10208 | Chrysophanol | PIK3CB   |
| 10208 | Chrysophanol | PIK3CD   |
| 10208 | Chrysophanol | PIK3CG   |
| 10208 | Chrysophanol | PIM1     |
| 10208 | Chrysophanol | PLA2G7   |
| 10208 | Chrysophanol | PLAA     |
| 10208 | Chrysophanol | PLEC     |
| 10208 | Chrysophanol | PRKDC    |
| 10208 | Chrysophanol | PTP4A3   |
| 10208 | Chrysophanol | RET      |
| 10208 | Chrysophanol | SRC      |

|       |                                                             |         |
|-------|-------------------------------------------------------------|---------|
| 14900 | Dilinoyl Palmitoyl<br>Glyceride,Glycerol1-<br>Monopalmitate | ABCB1   |
| 14900 | Dilinoyl Palmitoyl<br>Glyceride,Glycerol1-<br>Monopalmitate | ACACB   |
| 14900 | Dilinoyl Palmitoyl<br>Glyceride,Glycerol1-<br>Monopalmitate | ACP1    |
| 14900 | Dilinoyl Palmitoyl<br>Glyceride,Glycerol1-<br>Monopalmitate | AKT1    |
| 14900 | Dilinoyl Palmitoyl<br>Glyceride,Glycerol1-<br>Monopalmitate | APH1A   |
| 14900 | Dilinoyl Palmitoyl<br>Glyceride,Glycerol1-<br>Monopalmitate | APH1B   |
| 14900 | Dilinoyl Palmitoyl<br>Glyceride,Glycerol1-<br>Monopalmitate | FAAH    |
| 14900 | Dilinoyl Palmitoyl<br>Glyceride,Glycerol1-<br>Monopalmitate | FASN    |
| 14900 | Dilinoyl Palmitoyl<br>Glyceride,Glycerol1-<br>Monopalmitate | GPR119  |
| 14900 | Dilinoyl Palmitoyl<br>Glyceride,Glycerol1-<br>Monopalmitate | HMGCR   |
| 14900 | Dilinoyl Palmitoyl<br>Glyceride,Glycerol1-<br>Monopalmitate | HSD11B1 |
| 14900 | Dilinoyl Palmitoyl<br>Glyceride,Glycerol1-<br>Monopalmitate | ICAM1   |
| 14900 | Dilinoyl Palmitoyl<br>Glyceride,Glycerol1-<br>Monopalmitate | IKBKE   |
| 14900 | Dilinoyl Palmitoyl<br>Glyceride,Glycerol1-<br>Monopalmitate | IL2     |

|       |                                                             |        |
|-------|-------------------------------------------------------------|--------|
| 14900 | Dilinoyl Palmitoyl<br>Glyceride,Glycerol1-<br>Monopalmitate | ITGAL  |
| 14900 | Dilinoyl Palmitoyl<br>Glyceride,Glycerol1-<br>Monopalmitate | ITGB2  |
| 14900 | Dilinoyl Palmitoyl<br>Glyceride,Glycerol1-<br>Monopalmitate | LPAR5  |
| 14900 | Dilinoyl Palmitoyl<br>Glyceride,Glycerol1-<br>Monopalmitate | LPAR6  |
| 14900 | Dilinoyl Palmitoyl<br>Glyceride,Glycerol1-<br>Monopalmitate | NCSTN  |
| 14900 | Dilinoyl Palmitoyl<br>Glyceride,Glycerol1-<br>Monopalmitate | OPRK1  |
| 14900 | Dilinoyl Palmitoyl<br>Glyceride,Glycerol1-<br>Monopalmitate | PAM    |
| 14900 | Dilinoyl Palmitoyl<br>Glyceride,Glycerol1-<br>Monopalmitate | PPM1B  |
| 14900 | Dilinoyl Palmitoyl<br>Glyceride,Glycerol1-<br>Monopalmitate | PPP1CA |
| 14900 | Dilinoyl Palmitoyl<br>Glyceride,Glycerol1-<br>Monopalmitate | PPP1CC |
| 14900 | Dilinoyl Palmitoyl<br>Glyceride,Glycerol1-<br>Monopalmitate | PPP5C  |
| 14900 | Dilinoyl Palmitoyl<br>Glyceride,Glycerol1-<br>Monopalmitate | PRKCA  |
| 14900 | Dilinoyl Palmitoyl<br>Glyceride,Glycerol1-<br>Monopalmitate | PRKCD  |
| 14900 | Dilinoyl Palmitoyl<br>Glyceride,Glycerol1-<br>Monopalmitate | PRKCE  |

|       |                                                             |        |
|-------|-------------------------------------------------------------|--------|
| 14900 | Dilinoyl Palmitoyl<br>Glyceride,Glyceroll-<br>Monopalmitate | PRKCG  |
| 14900 | Dilinoyl Palmitoyl<br>Glyceride,Glyceroll-<br>Monopalmitate | PRKCH  |
| 14900 | Dilinoyl Palmitoyl<br>Glyceride,Glyceroll-<br>Monopalmitate | PRKCQ  |
| 14900 | Dilinoyl Palmitoyl<br>Glyceride,Glyceroll-<br>Monopalmitate | PSEN1  |
| 14900 | Dilinoyl Palmitoyl<br>Glyceride,Glyceroll-<br>Monopalmitate | PSEN2  |
| 14900 | Dilinoyl Palmitoyl<br>Glyceride,Glyceroll-<br>Monopalmitate | PSENEN |
| 14900 | Dilinoyl Palmitoyl<br>Glyceride,Glyceroll-<br>Monopalmitate | PTPN1  |
| 14900 | Dilinoyl Palmitoyl<br>Glyceride,Glyceroll-<br>Monopalmitate | S1PR1  |
| 14900 | Dilinoyl Palmitoyl<br>Glyceride,Glyceroll-<br>Monopalmitate | S1PR3  |
| 14900 | Dilinoyl Palmitoyl<br>Glyceride,Glyceroll-<br>Monopalmitate | S1PR4  |
| 14900 | Dilinoyl Palmitoyl<br>Glyceride,Glyceroll-<br>Monopalmitate | S1PR5  |
| 14900 | Dilinoyl Palmitoyl<br>Glyceride,Glyceroll-<br>Monopalmitate | SIRT2  |
| 14900 | Dilinoyl Palmitoyl<br>Glyceride,Glyceroll-<br>Monopalmitate | TBK1   |
| 14900 | Dilinoyl Palmitoyl<br>Glyceride,Glyceroll-<br>Monopalmitate | TRPV4  |



|       |                                                             |         |
|-------|-------------------------------------------------------------|---------|
| 14900 | Dilinoyl Palmitoyl<br>Glyceride,Glyceroll-<br>Monopalmitate | UGT2B7  |
| 14900 | Dilinoyl Palmitoyl<br>Glyceride,Glyceroll-<br>Monopalmitate | VDR     |
| 38762 | Ethylpentadecanoate                                         | ACHE    |
| 38762 | Ethylpentadecanoate                                         | AKT1    |
| 38762 | Ethylpentadecanoate                                         | CA1     |
| 38762 | Ethylpentadecanoate                                         | CA12    |
| 38762 | Ethylpentadecanoate                                         | CA2     |
| 38762 | Ethylpentadecanoate                                         | CA9     |
| 38762 | Ethylpentadecanoate                                         | CDC25A  |
| 38762 | Ethylpentadecanoate                                         | CYP19A1 |
| 38762 | Ethylpentadecanoate                                         | CYP24A1 |
| 38762 | Ethylpentadecanoate                                         | CYP27B1 |
| 38762 | Ethylpentadecanoate                                         | F2R     |
| 38762 | Ethylpentadecanoate                                         | FAAH    |
| 38762 | Ethylpentadecanoate                                         | FABP2   |
| 38762 | Ethylpentadecanoate                                         | FABP3   |
| 38762 | Ethylpentadecanoate                                         | FABP4   |
| 38762 | Ethylpentadecanoate                                         | FABP5   |
| 38762 | Ethylpentadecanoate                                         | FFAR1   |
| 38762 | Ethylpentadecanoate                                         | FNTA    |
| 38762 | Ethylpentadecanoate                                         | GNRHR   |
| 38762 | Ethylpentadecanoate                                         | GRIN2B  |
| 38762 | Ethylpentadecanoate                                         | HMGCR   |
| 38762 | Ethylpentadecanoate                                         | HRH3    |
| 38762 | Ethylpentadecanoate                                         | HRH4    |
| 38762 | Ethylpentadecanoate                                         | HSD11B1 |
| 38762 | Ethylpentadecanoate                                         | HSD17B3 |
| 38762 | Ethylpentadecanoate                                         | KCNH2   |
| 38762 | Ethylpentadecanoate                                         | LIMK2   |
| 38762 | Ethylpentadecanoate                                         | MAPK14  |
| 38762 | Ethylpentadecanoate                                         | MCHR1   |
| 38762 | Ethylpentadecanoate                                         | PAM     |
| 38762 | Ethylpentadecanoate                                         | PGGT1B  |
| 38762 | Ethylpentadecanoate                                         | PPM1B   |
| 38762 | Ethylpentadecanoate                                         | PPP1CC  |
| 38762 | Ethylpentadecanoate                                         | PRKCQ   |
| 38762 | Ethylpentadecanoate                                         | PTPN1   |
| 38762 | Ethylpentadecanoate                                         | ROCK1   |
| 38762 | Ethylpentadecanoate                                         | SIRT2   |
| 38762 | Ethylpentadecanoate                                         | SSTR2   |

|       |                                         |         |
|-------|-----------------------------------------|---------|
| 38762 | Ethylpentadecanoate                     | SSTR4   |
| 38762 | Ethylpentadecanoate                     | TRPV1   |
| 38762 | Ethylpentadecanoate                     | UGT2B7  |
| 38762 | Ethylpentadecanoate                     | VDR     |
| 8181  | Methyl Hexadecanate,Methyl<br>Palmitate | AKR1B10 |
| 8181  | Methyl Hexadecanate,Methyl<br>Palmitate | ALOX5   |
| 8181  | Methyl Hexadecanate,Methyl<br>Palmitate | CA1     |
| 8181  | Methyl Hexadecanate,Methyl<br>Palmitate | CA2     |
| 8181  | Methyl Hexadecanate,Methyl<br>Palmitate | CNR1    |
| 8181  | Methyl Hexadecanate,Methyl<br>Palmitate | CNR2    |
| 8181  | Methyl Hexadecanate,Methyl<br>Palmitate | CPT1A   |
| 8181  | Methyl Hexadecanate,Methyl<br>Palmitate | CYP19A1 |
| 8181  | Methyl Hexadecanate,Methyl<br>Palmitate | DCK     |
| 8181  | Methyl Hexadecanate,Methyl<br>Palmitate | F2R     |
| 8181  | Methyl Hexadecanate,Methyl<br>Palmitate | FABP2   |
| 8181  | Methyl Hexadecanate,Methyl<br>Palmitate | FABP3   |
| 8181  | Methyl Hexadecanate,Methyl<br>Palmitate | FABP4   |
| 8181  | Methyl Hexadecanate,Methyl<br>Palmitate | FABP5   |
| 8181  | Methyl Hexadecanate,Methyl<br>Palmitate | FFAR1   |
| 8181  | Methyl Hexadecanate,Methyl<br>Palmitate | G6PD    |
| 8181  | Methyl Hexadecanate,Methyl<br>Palmitate | GABBR1  |
| 8181  | Methyl Hexadecanate,Methyl<br>Palmitate | GPBAR1  |
| 8181  | Methyl Hexadecanate,Methyl<br>Palmitate | GRIN2B  |
| 8181  | Methyl Hexadecanate,Methyl<br>Palmitate | HMGCR   |

|       |                                         |          |
|-------|-----------------------------------------|----------|
| 8181  | Methyl Hexadecanate,Methyl<br>Palmitate | HSD11B1  |
| 8181  | Methyl Hexadecanate,Methyl<br>Palmitate | HSD17B3  |
| 8181  | Methyl Hexadecanate,Methyl<br>Palmitate | KDM2A    |
| 8181  | Methyl Hexadecanate,Methyl<br>Palmitate | KDM5C    |
| 8181  | Methyl Hexadecanate,Methyl<br>Palmitate | MPEG1    |
| 8181  | Methyl Hexadecanate,Methyl<br>Palmitate | NR1H4    |
| 8181  | Methyl Hexadecanate,Methyl<br>Palmitate | PHF8     |
| 8181  | Methyl Hexadecanate,Methyl<br>Palmitate | PLA2G4A  |
| 8181  | Methyl Hexadecanate,Methyl<br>Palmitate | POLB     |
| 8181  | Methyl Hexadecanate,Methyl<br>Palmitate | PPARA    |
| 8181  | Methyl Hexadecanate,Methyl<br>Palmitate | PPARD    |
| 8181  | Methyl Hexadecanate,Methyl<br>Palmitate | PTGFR    |
| 8181  | Methyl Hexadecanate,Methyl<br>Palmitate | PTPN1    |
| 8181  | Methyl Hexadecanate,Methyl<br>Palmitate | SERPINA6 |
| 8181  | Methyl Hexadecanate,Methyl<br>Palmitate | SHBG     |
| 8181  | Methyl Hexadecanate,Methyl<br>Palmitate | SLC1A1   |
| 8181  | Methyl Hexadecanate,Methyl<br>Palmitate | SLC22A6  |
| 8181  | Methyl Hexadecanate,Methyl<br>Palmitate | TRPV1    |
| 8181  | Methyl Hexadecanate,Methyl<br>Palmitate | UGT2B7   |
| 8181  | Methyl Hexadecanate,Methyl<br>Palmitate | VDR      |
| 23518 | Methyl Pentadecanoate                   | ABL1     |
| 23518 | Methyl Pentadecanoate                   | ACHE     |
| 23518 | Methyl Pentadecanoate                   | ADK      |
| 23518 | Methyl Pentadecanoate                   | ALOX5AP  |

|       |                       |         |
|-------|-----------------------|---------|
| 23518 | Methyl Pentadecanoate | APH1B   |
| 23518 | Methyl Pentadecanoate | APOB    |
| 23518 | Methyl Pentadecanoate | AR      |
| 23518 | Methyl Pentadecanoate | AVPR1A  |
| 23518 | Methyl Pentadecanoate | AVPR2   |
| 23518 | Methyl Pentadecanoate | BCL2    |
| 23518 | Methyl Pentadecanoate | CA1     |
| 23518 | Methyl Pentadecanoate | CA14    |
| 23518 | Methyl Pentadecanoate | CA2     |
| 23518 | Methyl Pentadecanoate | CCNE1   |
| 23518 | Methyl Pentadecanoate | CDC25A  |
| 23518 | Methyl Pentadecanoate | CDK2    |
| 23518 | Methyl Pentadecanoate | CDK4    |
| 23518 | Methyl Pentadecanoate | CLK1    |
| 23518 | Methyl Pentadecanoate | CLK2    |
| 23518 | Methyl Pentadecanoate | CLK4    |
| 23518 | Methyl Pentadecanoate | CNR1    |
| 23518 | Methyl Pentadecanoate | CNR2    |
| 23518 | Methyl Pentadecanoate | CPT1A   |
| 23518 | Methyl Pentadecanoate | CTSB    |
| 23518 | Methyl Pentadecanoate | CTSK    |
| 23518 | Methyl Pentadecanoate | CTSS    |
| 23518 | Methyl Pentadecanoate | CYP19A1 |
| 23518 | Methyl Pentadecanoate | DRD2    |
| 23518 | Methyl Pentadecanoate | DYRK1A  |
| 23518 | Methyl Pentadecanoate | DYRK1B  |
| 23518 | Methyl Pentadecanoate | F2R     |
| 23518 | Methyl Pentadecanoate | FABP2   |
| 23518 | Methyl Pentadecanoate | FABP3   |
| 23518 | Methyl Pentadecanoate | FABP4   |
| 23518 | Methyl Pentadecanoate | FABP5   |
| 23518 | Methyl Pentadecanoate | FFAR1   |
| 23518 | Methyl Pentadecanoate | FNTA    |
| 23518 | Methyl Pentadecanoate | FNTA    |
| 23518 | Methyl Pentadecanoate | FNTB    |
| 23518 | Methyl Pentadecanoate | GABBR1  |
| 23518 | Methyl Pentadecanoate | GCGR    |
| 23518 | Methyl Pentadecanoate | GRIN2B  |
| 23518 | Methyl Pentadecanoate | GRK2    |
| 23518 | Methyl Pentadecanoate | HMGCR   |
| 23518 | Methyl Pentadecanoate | HRH3    |
| 23518 | Methyl Pentadecanoate | HRH4    |
| 23518 | Methyl Pentadecanoate | HSD11B1 |
| 23518 | Methyl Pentadecanoate | HSD17B3 |

|        |                       |          |
|--------|-----------------------|----------|
| 23518  | Methyl Pentadecanoate | KDM2A    |
| 23518  | Methyl Pentadecanoate | KDM5C    |
| 23518  | Methyl Pentadecanoate | LIPE     |
| 23518  | Methyl Pentadecanoate | LRRK2    |
| 23518  | Methyl Pentadecanoate | MAPK14   |
| 23518  | Methyl Pentadecanoate | MCL1     |
| 23518  | Methyl Pentadecanoate | MDM2     |
| 23518  | Methyl Pentadecanoate | MGLL     |
| 23518  | Methyl Pentadecanoate | MTTP     |
| 23518  | Methyl Pentadecanoate | NCSTN    |
| 23518  | Methyl Pentadecanoate | NPY5R    |
| 23518  | Methyl Pentadecanoate | NR1H4    |
| 23518  | Methyl Pentadecanoate | PDE10A   |
| 23518  | Methyl Pentadecanoate | PGGT1B   |
| 23518  | Methyl Pentadecanoate | PHF8     |
| 23518  | Methyl Pentadecanoate | POLB     |
| 23518  | Methyl Pentadecanoate | PPARA    |
| 23518  | Methyl Pentadecanoate | PPARD    |
| 23518  | Methyl Pentadecanoate | PSEN1    |
| 23518  | Methyl Pentadecanoate | PSEN2    |
| 23518  | Methyl Pentadecanoate | PSENE1   |
| 23518  | Methyl Pentadecanoate | PTPN1    |
| 23518  | Methyl Pentadecanoate | RARA     |
| 23518  | Methyl Pentadecanoate | RARB     |
| 23518  | Methyl Pentadecanoate | RARG     |
| 23518  | Methyl Pentadecanoate | ROCK1    |
| 23518  | Methyl Pentadecanoate | SERPINA6 |
| 23518  | Methyl Pentadecanoate | SLC1A1   |
| 23518  | Methyl Pentadecanoate | SLC22A6  |
| 23518  | Methyl Pentadecanoate | STS      |
| 23518  | Methyl Pentadecanoate | TOP2A    |
| 23518  | Methyl Pentadecanoate | TRPV1    |
| 23518  | Methyl Pentadecanoate | TSPO     |
| 23518  | Methyl Pentadecanoate | UGT2B7   |
| 23518  | Methyl Pentadecanoate | VDR      |
| 161748 | Myricanone            | ABL1     |
| 161748 | Myricanone            | ADAM17   |
| 161748 | Myricanone            | ADAM9    |
| 161748 | Myricanone            | ADORA2A  |
| 161748 | Myricanone            | ADORA2B  |
| 161748 | Myricanone            | ADRA2A   |
| 161748 | Myricanone            | ADRA2B   |
| 161748 | Myricanone            | ADRA2C   |
| 161748 | Myricanone            | ALOX5    |

|        |            |         |
|--------|------------|---------|
| 161748 | Myricanone | ANPEP   |
| 161748 | Myricanone | AURKA   |
| 161748 | Myricanone | BLK     |
| 161748 | Myricanone | BMX     |
| 161748 | Myricanone | BRAF    |
| 161748 | Myricanone | BTK     |
| 161748 | Myricanone | CA9     |
| 161748 | Myricanone | CCNA1   |
| 161748 | Myricanone | CCNA2   |
| 161748 | Myricanone | CDK1    |
| 161748 | Myricanone | CDK2    |
| 161748 | Myricanone | CDK5    |
| 161748 | Myricanone | CDK5R1  |
| 161748 | Myricanone | CMA1    |
| 161748 | Myricanone | CNR1    |
| 161748 | Myricanone | CNR2    |
| 161748 | Myricanone | COQ8B   |
| 161748 | Myricanone | CSK     |
| 161748 | Myricanone | CTSV    |
| 161748 | Myricanone | CXCR2   |
| 161748 | Myricanone | CYP11B1 |
| 161748 | Myricanone | CYP11B2 |
| 161748 | Myricanone | DYRK1A  |
| 161748 | Myricanone | EGFR    |
| 161748 | Myricanone | EGLN1   |
| 161748 | Myricanone | ELANE   |
| 161748 | Myricanone | EPHA1   |
| 161748 | Myricanone | EPHA2   |
| 161748 | Myricanone | EPHA3   |
| 161748 | Myricanone | EPHA4   |
| 161748 | Myricanone | EPHA5   |
| 161748 | Myricanone | EPHA6   |
| 161748 | Myricanone | EPHB2   |
| 161748 | Myricanone | EPHB3   |
| 161748 | Myricanone | ERBB2   |
| 161748 | Myricanone | FAAH    |
| 161748 | Myricanone | FGR     |
| 161748 | Myricanone | FLT1    |
| 161748 | Myricanone | FLT3    |
| 161748 | Myricanone | FLT4    |
| 161748 | Myricanone | FYN     |
| 161748 | Myricanone | GCGR    |
| 161748 | Myricanone | GSK3B   |
| 161748 | Myricanone | HDAC10  |

|        |            |          |
|--------|------------|----------|
| 161748 | Myricanone | HDAC11   |
| 161748 | Myricanone | HDAC3    |
| 161748 | Myricanone | HDAC3    |
| 161748 | Myricanone | HDAC7    |
| 161748 | Myricanone | HSP90AA1 |
| 161748 | Myricanone | HSP90AB1 |
| 161748 | Myricanone | JAK2     |
| 161748 | Myricanone | LCK      |
| 161748 | Myricanone | LYN      |
| 161748 | Myricanone | MAP2K2   |
| 161748 | Myricanone | MAPK14   |
| 161748 | Myricanone | MAPKAPK2 |
| 161748 | Myricanone | MMP1     |
| 161748 | Myricanone | MMP13    |
| 161748 | Myricanone | MMP2     |
| 161748 | Myricanone | MMP3     |
| 161748 | Myricanone | MMP7     |
| 161748 | Myricanone | MMP9     |
| 161748 | Myricanone | MYLK     |
| 161748 | Myricanone | NCOR1    |
| 161748 | Myricanone | NOX4     |
| 161748 | Myricanone | NPY5R    |
| 161748 | Myricanone | P2RX7    |
| 161748 | Myricanone | PARP1    |
| 161748 | Myricanone | PDE10A   |
| 161748 | Myricanone | PDGFRA   |
| 161748 | Myricanone | PIK3CD   |
| 161748 | Myricanone | PIK3CG   |
| 161748 | Myricanone | PIM1     |
| 161748 | Myricanone | PIM2     |
| 161748 | Myricanone | PIM3     |
| 161748 | Myricanone | PLA2G7   |
| 161748 | Myricanone | PPIA     |
| 161748 | Myricanone | PRKCG    |
| 161748 | Myricanone | PTK2B    |
| 161748 | Myricanone | PTK6     |
| 161748 | Myricanone | RAF1     |
| 161748 | Myricanone | RET      |
| 161748 | Myricanone | ROCK1    |
| 161748 | Myricanone | ROCK2    |
| 161748 | Myricanone | RPS6KB1  |
| 161748 | Myricanone | STAT3    |
| 161748 | Myricanone | STAT6    |
| 161748 | Myricanone | SYK      |

|        |                              |         |
|--------|------------------------------|---------|
| 161748 | Myricanone                   | TAAR1   |
| 161748 | Myricanone                   | TACR3   |
| 161748 | Myricanone                   | TRPM8   |
| 161748 | Myricanone                   | TXK     |
| 161748 | Myricanone                   | TYMS    |
| 161748 | Myricanone                   | TYRO3   |
| 161748 | Myricanone                   | YES1    |
| 445354 | Retinol                      | ADORA3  |
| 445354 | Retinol                      | ADRA2B  |
| 445354 | Retinol                      | CCNB2   |
| 445354 | Retinol                      | CNR1    |
| 445354 | Retinol                      | EPHX2   |
| 445354 | Retinol                      | ESR1    |
| 445354 | Retinol                      | ESR2    |
| 445354 | Retinol                      | GRM2    |
| 445354 | Retinol                      | HTR2B   |
| 445354 | Retinol                      | MAPK1   |
| 445354 | Retinol                      | MAPK14  |
| 445354 | Retinol                      | RARA    |
| 445354 | Retinol                      | RARB    |
| 445354 | Retinol                      | RARG    |
| 445354 | Retinol                      | RBP4    |
| 445354 | Retinol                      | RORA    |
| 445354 | Retinol                      | RORB    |
| 445354 | Retinol                      | RORC    |
| 445354 | Retinol                      | RXRA    |
| 445354 | Retinol                      | RXRB    |
| 445354 | Retinol                      | RXRG    |
| 445858 | 3-O-trans ferulylquinic acid | ABCB1   |
| 445858 | 3-O-trans ferulylquinic acid | ABCB1   |
| 445858 | 3-O-trans ferulylquinic acid | ADORA1  |
| 445858 | 3-O-trans ferulylquinic acid | ADORA2A |
| 445858 | 3-O-trans ferulylquinic acid | ADORA2B |
| 445858 | 3-O-trans ferulylquinic acid | AHR     |
| 445858 | 3-O-trans ferulylquinic acid | AKR1B1  |
| 445858 | 3-O-trans ferulylquinic acid | AKR1B10 |
| 445858 | 3-O-trans ferulylquinic acid | ALOX15  |
| 445858 | 3-O-trans ferulylquinic acid | ALOX5   |
| 445858 | 3-O-trans ferulylquinic acid | AMPD3   |
| 445858 | 3-O-trans ferulylquinic acid | APP     |
| 445858 | 3-O-trans ferulylquinic acid | BACE1   |
| 445858 | 3-O-trans ferulylquinic acid | CA1     |
| 445858 | 3-O-trans ferulylquinic acid | CA12    |
| 445858 | 3-O-trans ferulylquinic acid | CA13    |



|        |                              |         |
|--------|------------------------------|---------|
| 445858 | 3-O-trans ferulylquinic acid | CA14    |
| 445858 | 3-O-trans ferulylquinic acid | CA2     |
| 445858 | 3-O-trans ferulylquinic acid | CA3     |
| 445858 | 3-O-trans ferulylquinic acid | CA4     |
| 445858 | 3-O-trans ferulylquinic acid | CA5A    |
| 445858 | 3-O-trans ferulylquinic acid | CA5B    |
| 445858 | 3-O-trans ferulylquinic acid | CA6     |
| 445858 | 3-O-trans ferulylquinic acid | CA7     |
| 445858 | 3-O-trans ferulylquinic acid | CA9     |
| 445858 | 3-O-trans ferulylquinic acid | CCND1   |
| 445858 | 3-O-trans ferulylquinic acid | CDK4    |
| 445858 | 3-O-trans ferulylquinic acid | CPA1    |
| 445858 | 3-O-trans ferulylquinic acid | CYP1A1  |
| 445858 | 3-O-trans ferulylquinic acid | CYP1A2  |
| 445858 | 3-O-trans ferulylquinic acid | CYP1B1  |
| 445858 | 3-O-trans ferulylquinic acid | EGFR    |
| 445858 | 3-O-trans ferulylquinic acid | ESR2    |
| 445858 | 3-O-trans ferulylquinic acid | F3      |
| 445858 | 3-O-trans ferulylquinic acid | FBP1    |
| 445858 | 3-O-trans ferulylquinic acid | FYN     |
| 445858 | 3-O-trans ferulylquinic acid | GLO1    |
| 445858 | 3-O-trans ferulylquinic acid | HSD11B1 |
| 445858 | 3-O-trans ferulylquinic acid | KDM4C   |
| 445858 | 3-O-trans ferulylquinic acid | LCK     |
| 445858 | 3-O-trans ferulylquinic acid | MAOB    |
| 445858 | 3-O-trans ferulylquinic acid | MET     |
| 445858 | 3-O-trans ferulylquinic acid | MMP1    |
| 445858 | 3-O-trans ferulylquinic acid | MMP2    |
| 445858 | 3-O-trans ferulylquinic acid | MMP9    |
| 445858 | 3-O-trans ferulylquinic acid | NFE2L2  |
| 445858 | 3-O-trans ferulylquinic acid | NOS2    |
| 445858 | 3-O-trans ferulylquinic acid | NQO2    |
| 445858 | 3-O-trans ferulylquinic acid | PARP1   |
| 445858 | 3-O-trans ferulylquinic acid | PRKCE   |
| 445858 | 3-O-trans ferulylquinic acid | PTGS1   |
| 445858 | 3-O-trans ferulylquinic acid | PTGS2   |
| 445858 | 3-O-trans ferulylquinic acid | PTPN1   |
| 445858 | 3-O-trans ferulylquinic acid | RELA    |
| 445858 | 3-O-trans ferulylquinic acid | SLC16A1 |
| 445858 | 3-O-trans ferulylquinic acid | STAT3   |
| 445858 | 3-O-trans ferulylquinic acid | TLR4    |
| 445858 | 3-O-trans ferulylquinic acid | TLR9    |
| 445858 | 3-O-trans ferulylquinic acid | TOP2A   |
| 445858 | 3-O-trans ferulylquinic acid | TTR     |

|        |                              |        |
|--------|------------------------------|--------|
| 445858 | 3-O-trans ferulylquinic acid | TUBB1  |
| 445858 | 3-O-trans ferulylquinic acid | TUBB3  |
| 98455  | stepharine                   | ACHE   |
| 98455  | stepharine                   | AURKA  |
| 98455  | stepharine                   | AURKB  |
| 98455  | stepharine                   | BDKRB2 |
| 98455  | stepharine                   | CDC25C |
| 98455  | stepharine                   | CDC42  |
| 98455  | stepharine                   | CDC7   |
| 98455  | stepharine                   | CDK1   |
| 98455  | stepharine                   | CHEK1  |
| 98455  | stepharine                   | CHRM1  |
| 98455  | stepharine                   | CHRM3  |
| 98455  | stepharine                   | CHRM5  |
| 98455  | stepharine                   | CHRNA4 |
| 98455  | stepharine                   | CSF1R  |
| 98455  | stepharine                   | DPP4   |
| 98455  | stepharine                   | DPP9   |
| 98455  | stepharine                   | DRD1   |
| 98455  | stepharine                   | DRD2   |
| 98455  | stepharine                   | DRD3   |
| 98455  | stepharine                   | FAAH   |
| 98455  | stepharine                   | FAP    |
| 98455  | stepharine                   | HDAC1  |
| 98455  | stepharine                   | HDAC6  |
| 98455  | stepharine                   | HPGD   |
| 98455  | stepharine                   | HTR1A  |
| 98455  | stepharine                   | HTR1F  |
| 98455  | stepharine                   | HTR3A  |
| 98455  | stepharine                   | JAK1   |
| 98455  | stepharine                   | JAK2   |
| 98455  | stepharine                   | JAK3   |
| 98455  | stepharine                   | KCNH2  |
| 98455  | stepharine                   | KCNJ1  |
| 98455  | stepharine                   | MALT1  |
| 98455  | stepharine                   | MAP2K1 |
| 98455  | stepharine                   | MC4R   |
| 98455  | stepharine                   | MPO    |
| 98455  | stepharine                   | MTNR1A |
| 98455  | stepharine                   | MTNR1B |
| 98455  | stepharine                   | OPRD1  |
| 98455  | stepharine                   | OPRK1  |
| 98455  | stepharine                   | OPRM1  |
| 98455  | stepharine                   | PAOX   |

|         |               |         |
|---------|---------------|---------|
| 98455   | stepharine    | PARP2   |
| 98455   | stepharine    | PARP3   |
| 98455   | stepharine    | PIM2    |
| 98455   | stepharine    | PIM3    |
| 98455   | stepharine    | PKN2    |
| 98455   | stepharine    | PRKCD   |
| 98455   | stepharine    | PRKCE   |
| 98455   | stepharine    | PRKD1   |
| 98455   | stepharine    | PRKX    |
| 98455   | stepharine    | ROCK1   |
| 98455   | stepharine    | ROCK2   |
| 98455   | stepharine    | ROCK2   |
| 98455   | stepharine    | RPS6KA5 |
| 98455   | stepharine    | RPS6KB1 |
| 98455   | stepharine    | SIGMAR1 |
| 98455   | stepharine    | SLC6A4  |
| 98455   | stepharine    | TTK     |
| 98455   | stepharine    | TYK2    |
| 98455   | stepharine    | WDR5    |
| 98455   | stepharine    | WEE1    |
| 5280450 | Linoleic Acid | ACP1    |
| 5280450 | Linoleic Acid | ADORA3  |
| 5280450 | Linoleic Acid | ADRA2B  |
| 5280450 | Linoleic Acid | AKR1B10 |
| 5280450 | Linoleic Acid | ALOX12  |
| 5280450 | Linoleic Acid | ALOX15  |
| 5280450 | Linoleic Acid | ALOX5   |
| 5280450 | Linoleic Acid | ALOX5AP |
| 5280450 | Linoleic Acid | AR      |
| 5280450 | Linoleic Acid | BCHE    |
| 5280450 | Linoleic Acid | CD81    |
| 5280450 | Linoleic Acid | CDC25A  |
| 5280450 | Linoleic Acid | CDC25B  |
| 5280450 | Linoleic Acid | CES2    |
| 5280450 | Linoleic Acid | CMA1    |
| 5280450 | Linoleic Acid | CNR1    |
| 5280450 | Linoleic Acid | CTSG    |
| 5280450 | Linoleic Acid | CYP17A1 |
| 5280450 | Linoleic Acid | CYP19A1 |
| 5280450 | Linoleic Acid | CYP26A1 |
| 5280450 | Linoleic Acid | CYP26B1 |
| 5280450 | Linoleic Acid | CYP51A1 |
| 5280450 | Linoleic Acid | DRD2    |
| 5280450 | Linoleic Acid | ENPP2   |

|         |               |         |
|---------|---------------|---------|
| 5280450 | Linoleic Acid | ESR1    |
| 5280450 | Linoleic Acid | ESR2    |
| 5280450 | Linoleic Acid | FAAH    |
| 5280450 | Linoleic Acid | FABP1   |
| 5280450 | Linoleic Acid | FABP2   |
| 5280450 | Linoleic Acid | FABP3   |
| 5280450 | Linoleic Acid | FABP4   |
| 5280450 | Linoleic Acid | FABP5   |
| 5280450 | Linoleic Acid | FFAR1   |
| 5280450 | Linoleic Acid | FFAR4   |
| 5280450 | Linoleic Acid | FNTA    |
| 5280450 | Linoleic Acid | G6PD    |
| 5280450 | Linoleic Acid | GLUL    |
| 5280450 | Linoleic Acid | GPBAR1  |
| 5280450 | Linoleic Acid | GRM2    |
| 5280450 | Linoleic Acid | HMGCR   |
| 5280450 | Linoleic Acid | HSD11B1 |
| 5280450 | Linoleic Acid | HSD11B2 |
| 5280450 | Linoleic Acid | HTR2B   |
| 5280450 | Linoleic Acid | IL6     |
| 5280450 | Linoleic Acid | LTB4R   |
| 5280450 | Linoleic Acid | MAPK1   |
| 5280450 | Linoleic Acid | MAPK14  |
| 5280450 | Linoleic Acid | MAPK3   |
| 5280450 | Linoleic Acid | NOS2    |
| 5280450 | Linoleic Acid | NPC1L1  |
| 5280450 | Linoleic Acid | NR1H3   |
| 5280450 | Linoleic Acid | NR3C1   |
| 5280450 | Linoleic Acid | NR3C2   |
| 5280450 | Linoleic Acid | PDE4D   |
| 5280450 | Linoleic Acid | PGR     |
| 5280450 | Linoleic Acid | PLA2G1B |
| 5280450 | Linoleic Acid | PLA2G4A |
| 5280450 | Linoleic Acid | POLB    |
| 5280450 | Linoleic Acid | PPARA   |
| 5280450 | Linoleic Acid | PPARD   |
| 5280450 | Linoleic Acid | PPARG   |
| 5280450 | Linoleic Acid | PREP    |
| 5280450 | Linoleic Acid | PRKCH   |
| 5280450 | Linoleic Acid | PSEN2   |
| 5280450 | Linoleic Acid | PTGDR2  |
| 5280450 | Linoleic Acid | PTGER1  |
| 5280450 | Linoleic Acid | PTGER2  |
| 5280450 | Linoleic Acid | PTGER4  |

|         |               |          |
|---------|---------------|----------|
| 5280450 | Linoleic Acid | PTGES    |
| 5280450 | Linoleic Acid | PTGIR    |
| 5280450 | Linoleic Acid | PTGS1    |
| 5280450 | Linoleic Acid | PTGS2    |
| 5280450 | Linoleic Acid | PTPN1    |
| 5280450 | Linoleic Acid | PTPN11   |
| 5280450 | Linoleic Acid | PTPN2    |
| 5280450 | Linoleic Acid | PTPN6    |
| 5280450 | Linoleic Acid | PTPRF    |
| 5280450 | Linoleic Acid | RBP4     |
| 5280450 | Linoleic Acid | RORB     |
| 5280450 | Linoleic Acid | RORC     |
| 5280450 | Linoleic Acid | RXRB     |
| 5280450 | Linoleic Acid | SCD      |
| 5280450 | Linoleic Acid | SERPINA6 |
| 5280450 | Linoleic Acid | SHBG     |
| 5280450 | Linoleic Acid | SIGMAR1  |
| 5280450 | Linoleic Acid | SLC16A1  |
| 5280450 | Linoleic Acid | SRD5A2   |
| 5280450 | Linoleic Acid | TERT     |
| 5280450 | Linoleic Acid | TOP1     |
| 5280450 | Linoleic Acid | TOP2A    |
| 5280450 | Linoleic Acid | TRPV1    |
| 11005   | Myristic Acid | ADRA2B   |
| 11005   | Myristic Acid | AKR1B10  |
| 11005   | Myristic Acid | AKR1C3   |
| 11005   | Myristic Acid | ALOX12   |
| 11005   | Myristic Acid | ALOX15   |
| 11005   | Myristic Acid | AR       |
| 11005   | Myristic Acid | BCL2L1   |
| 11005   | Myristic Acid | CA1      |
| 11005   | Myristic Acid | CA2      |
| 11005   | Myristic Acid | CACNA2D1 |
| 11005   | Myristic Acid | CDC25A   |
| 11005   | Myristic Acid | CHRNA7   |
| 11005   | Myristic Acid | CMA1     |
| 11005   | Myristic Acid | CTSG     |
| 11005   | Myristic Acid | CYP19A1  |
| 11005   | Myristic Acid | CYP26A1  |
| 11005   | Myristic Acid | CYP26B1  |
| 11005   | Myristic Acid | EDNRA    |
| 11005   | Myristic Acid | EPHX2    |
| 11005   | Myristic Acid | FABP2    |
| 11005   | Myristic Acid | FABP3    |

|       |               |         |
|-------|---------------|---------|
| 11005 | Myristic Acid | FABP4   |
| 11005 | Myristic Acid | FABP5   |
| 11005 | Myristic Acid | FDFT1   |
| 11005 | Myristic Acid | FFAR1   |
| 11005 | Myristic Acid | FFAR4   |
| 11005 | Myristic Acid | FNTA    |
| 11005 | Myristic Acid | G6PD    |
| 11005 | Myristic Acid | GABBR1  |
| 11005 | Myristic Acid | GABRA2  |
| 11005 | Myristic Acid | GPBAR1  |
| 11005 | Myristic Acid | GRM5    |
| 11005 | Myristic Acid | GSTK1   |
| 11005 | Myristic Acid | HAO1    |
| 11005 | Myristic Acid | HSD11B1 |
| 11005 | Myristic Acid | HSD11B2 |
| 11005 | Myristic Acid | HSD17B3 |
| 11005 | Myristic Acid | HTR2B   |
| 11005 | Myristic Acid | IMPDH2  |
| 11005 | Myristic Acid | KDM2A   |
| 11005 | Myristic Acid | KDM5C   |
| 11005 | Myristic Acid | KEAP1   |
| 11005 | Myristic Acid | MAPK1   |
| 11005 | Myristic Acid | MAPK14  |
| 11005 | Myristic Acid | MDM2    |
| 11005 | Myristic Acid | NPC1L1  |
| 11005 | Myristic Acid | NR1H4   |
| 11005 | Myristic Acid | NR3C2   |
| 11005 | Myristic Acid | PGR     |
| 11005 | Myristic Acid | PHF8    |
| 11005 | Myristic Acid | PLA2G4A |
| 11005 | Myristic Acid | PLG     |
| 11005 | Myristic Acid | POLB    |
| 11005 | Myristic Acid | PPARA   |
| 11005 | Myristic Acid | PPARD   |
| 11005 | Myristic Acid | PPARG   |
| 11005 | Myristic Acid | PTGDR   |
| 11005 | Myristic Acid | PTGDR2  |
| 11005 | Myristic Acid | PTGER2  |
| 11005 | Myristic Acid | PTGER3  |
| 11005 | Myristic Acid | PTGER4  |
| 11005 | Myristic Acid | PTGES   |
| 11005 | Myristic Acid | PTGES2  |
| 11005 | Myristic Acid | PTGFR   |
| 11005 | Myristic Acid | PTPN1   |

|       |               |          |
|-------|---------------|----------|
| 11005 | Myristic Acid | RARA     |
| 11005 | Myristic Acid | RARB     |
| 11005 | Myristic Acid | RARG     |
| 11005 | Myristic Acid | RBP4     |
| 11005 | Myristic Acid | RORA     |
| 11005 | Myristic Acid | RORB     |
| 11005 | Myristic Acid | RXRA     |
| 11005 | Myristic Acid | RXRB     |
| 11005 | Myristic Acid | RXRG     |
| 11005 | Myristic Acid | SERPINA6 |
| 11005 | Myristic Acid | SHBG     |
| 11005 | Myristic Acid | SLC16A1  |
| 11005 | Myristic Acid | SLC22A12 |
| 11005 | Myristic Acid | SLC22A6  |
| 11005 | Myristic Acid | TBXA2R   |
| 11005 | Myristic Acid | TRPA1    |
| 11005 | Myristic Acid | UGT2B7   |
| 11005 | Myristic Acid | VDR      |
| 5281  | Stearic Acid  | AKR1B10  |
| 5281  | Stearic Acid  | AR       |
| 5281  | Stearic Acid  | CA1      |
| 5281  | Stearic Acid  | CA2      |
| 5281  | Stearic Acid  | CACNA2D1 |
| 5281  | Stearic Acid  | CDC25A   |
| 5281  | Stearic Acid  | CDC45    |
| 5281  | Stearic Acid  | CHRNA7   |
| 5281  | Stearic Acid  | CYP19A1  |
| 5281  | Stearic Acid  | CYP26A1  |
| 5281  | Stearic Acid  | CYP26B1  |
| 5281  | Stearic Acid  | FAAH     |
| 5281  | Stearic Acid  | FABP1    |
| 5281  | Stearic Acid  | FABP2    |
| 5281  | Stearic Acid  | FABP3    |
| 5281  | Stearic Acid  | FABP4    |
| 5281  | Stearic Acid  | FABP5    |
| 5281  | Stearic Acid  | FFAR1    |
| 5281  | Stearic Acid  | FNTA     |
| 5281  | Stearic Acid  | G6PD     |
| 5281  | Stearic Acid  | GABBR1   |
| 5281  | Stearic Acid  | GABRA2   |
| 5281  | Stearic Acid  | GLRA1    |
| 5281  | Stearic Acid  | GPBAR1   |
| 5281  | Stearic Acid  | GRM5     |
| 5281  | Stearic Acid  | GSTK1    |

|        |                |          |
|--------|----------------|----------|
| 5281   | Stearic Acid   | HAO1     |
| 5281   | Stearic Acid   | HMGCR    |
| 5281   | Stearic Acid   | HSD11B1  |
| 5281   | Stearic Acid   | HSD11B2  |
| 5281   | Stearic Acid   | HSD17B3  |
| 5281   | Stearic Acid   | KDM2A    |
| 5281   | Stearic Acid   | KDM5C    |
| 5281   | Stearic Acid   | NPC1L1   |
| 5281   | Stearic Acid   | NR0B2    |
| 5281   | Stearic Acid   | NR1H4    |
| 5281   | Stearic Acid   | PDE4A    |
| 5281   | Stearic Acid   | PDE4B    |
| 5281   | Stearic Acid   | PHF8     |
| 5281   | Stearic Acid   | PLG      |
| 5281   | Stearic Acid   | POLB     |
| 5281   | Stearic Acid   | PPARA    |
| 5281   | Stearic Acid   | PPARD    |
| 5281   | Stearic Acid   | PPARG    |
| 5281   | Stearic Acid   | PTGER2   |
| 5281   | Stearic Acid   | PTGER4   |
| 5281   | Stearic Acid   | PTGFR    |
| 5281   | Stearic Acid   | PTPN1    |
| 5281   | Stearic Acid   | PTPRC    |
| 5281   | Stearic Acid   | RARA     |
| 5281   | Stearic Acid   | RARB     |
| 5281   | Stearic Acid   | RARG     |
| 5281   | Stearic Acid   | RXRA     |
| 5281   | Stearic Acid   | RXRB     |
| 5281   | Stearic Acid   | RXRG     |
| 5281   | Stearic Acid   | SAE1     |
| 5281   | Stearic Acid   | SCD      |
| 5281   | Stearic Acid   | SERPINA6 |
| 5281   | Stearic Acid   | SHBG     |
| 5281   | Stearic Acid   | SLC16A1  |
| 5281   | Stearic Acid   | SLC22A6  |
| 5281   | Stearic Acid   | TERT     |
| 5281   | Stearic Acid   | UGT2B7   |
| 5281   | Stearic Acid   | VDR      |
| 222656 | Malic Acid     | ACLY     |
| 222656 | Malic Acid     | CHRNA7   |
| 222656 | Malic Acid     | EGLN1    |
| 222656 | Malic Acid     | FDFT1    |
| 938    | Nicotinic Acid | DDO      |
| 938    | Nicotinic Acid | FYN      |



|        |                 |         |
|--------|-----------------|---------|
| 938    | Nicotinic Acid  | HCAR2   |
| 938    | Nicotinic Acid  | LCK     |
| 938    | Nicotinic Acid  | SIRT2   |
| 938    | Nicotinic Acid  | SIRT3   |
| 938    | Nicotinic Acid  | SLC22A6 |
| 470606 | Alphitolic Acid | ACP1    |
| 470606 | Alphitolic Acid | ADORA3  |
| 470606 | Alphitolic Acid | AGTR1   |
| 470606 | Alphitolic Acid | AKR1B10 |
| 470606 | Alphitolic Acid | ALOX5   |
| 470606 | Alphitolic Acid | ALOX5AP |
| 470606 | Alphitolic Acid | AR      |
| 470606 | Alphitolic Acid | BACE1   |
| 470606 | Alphitolic Acid | CD81    |
| 470606 | Alphitolic Acid | CDC25A  |
| 470606 | Alphitolic Acid | CDC25B  |
| 470606 | Alphitolic Acid | CES2    |
| 470606 | Alphitolic Acid | CYP17A1 |
| 470606 | Alphitolic Acid | CYP19A1 |
| 470606 | Alphitolic Acid | CYP2C19 |
| 470606 | Alphitolic Acid | CYP51A1 |
| 470606 | Alphitolic Acid | ESR1    |
| 470606 | Alphitolic Acid | ESR2    |
| 470606 | Alphitolic Acid | FAAH    |
| 470606 | Alphitolic Acid | FABP1   |
| 470606 | Alphitolic Acid | FABP3   |
| 470606 | Alphitolic Acid | FABP4   |
| 470606 | Alphitolic Acid | FABP5   |
| 470606 | Alphitolic Acid | FNTA    |
| 470606 | Alphitolic Acid | G6PD    |
| 470606 | Alphitolic Acid | GPBAR1  |
| 470606 | Alphitolic Acid | HMGCR   |
| 470606 | Alphitolic Acid | HSD11B1 |
| 470606 | Alphitolic Acid | HSD11B2 |
| 470606 | Alphitolic Acid | LTB4R   |
| 470606 | Alphitolic Acid | NOS2    |
| 470606 | Alphitolic Acid | NPC1L1  |
| 470606 | Alphitolic Acid | NR1H3   |
| 470606 | Alphitolic Acid | NR1H4   |
| 470606 | Alphitolic Acid | NR3C1   |
| 470606 | Alphitolic Acid | NR3C2   |
| 470606 | Alphitolic Acid | PDE4D   |
| 470606 | Alphitolic Acid | PGR     |
| 470606 | Alphitolic Acid | PLA2G1B |

|        |                  |          |
|--------|------------------|----------|
| 470606 | Alphitolic Acid  | PLA2G4A  |
| 470606 | Alphitolic Acid  | POLB     |
| 470606 | Alphitolic Acid  | PPARA    |
| 470606 | Alphitolic Acid  | PPARD    |
| 470606 | Alphitolic Acid  | PPARG    |
| 470606 | Alphitolic Acid  | PREP     |
| 470606 | Alphitolic Acid  | PRKCH    |
| 470606 | Alphitolic Acid  | PTGDR    |
| 470606 | Alphitolic Acid  | PTGER1   |
| 470606 | Alphitolic Acid  | PTGER2   |
| 470606 | Alphitolic Acid  | PTGER4   |
| 470606 | Alphitolic Acid  | PTGES    |
| 470606 | Alphitolic Acid  | PTGFR    |
| 470606 | Alphitolic Acid  | PTGIR    |
| 470606 | Alphitolic Acid  | PTGS1    |
| 470606 | Alphitolic Acid  | PTGS2    |
| 470606 | Alphitolic Acid  | PTPN1    |
| 470606 | Alphitolic Acid  | PTPN11   |
| 470606 | Alphitolic Acid  | PTPN2    |
| 470606 | Alphitolic Acid  | PTPN6    |
| 470606 | Alphitolic Acid  | PTPRF    |
| 470606 | Alphitolic Acid  | RORA     |
| 470606 | Alphitolic Acid  | RORC     |
| 470606 | Alphitolic Acid  | SAE1     |
| 470606 | Alphitolic Acid  | SCD      |
| 470606 | Alphitolic Acid  | SERPINA6 |
| 470606 | Alphitolic Acid  | SHBG     |
| 470606 | Alphitolic Acid  | SIGMAR1  |
| 470606 | Alphitolic Acid  | SLC22A6  |
| 470606 | Alphitolic Acid  | SLC6A3   |
| 470606 | Alphitolic Acid  | SRD5A2   |
| 470606 | Alphitolic Acid  | TLR9     |
| 470606 | Alphitolic Acid  | TOP1     |
| 470606 | Alphitolic Acid  | TOP2A    |
| 445638 | Palmitoleic Acid | ACHE     |
| 445638 | Palmitoleic Acid | ACP1     |
| 445638 | Palmitoleic Acid | ADORA3   |
| 445638 | Palmitoleic Acid | AKR1B10  |
| 445638 | Palmitoleic Acid | ALOX12   |
| 445638 | Palmitoleic Acid | ALOX5    |
| 445638 | Palmitoleic Acid | AR       |
| 445638 | Palmitoleic Acid | BACE1    |
| 445638 | Palmitoleic Acid | BCHE     |
| 445638 | Palmitoleic Acid | BCL2     |

|        |                  |         |
|--------|------------------|---------|
| 445638 | Palmitoleic Acid | CD81    |
| 445638 | Palmitoleic Acid | CDC25A  |
| 445638 | Palmitoleic Acid | CDC25B  |
| 445638 | Palmitoleic Acid | CES2    |
| 445638 | Palmitoleic Acid | CHRM2   |
| 445638 | Palmitoleic Acid | CMA1    |
| 445638 | Palmitoleic Acid | CNR1    |
| 445638 | Palmitoleic Acid | CTSG    |
| 445638 | Palmitoleic Acid | CYP17A1 |
| 445638 | Palmitoleic Acid | CYP19A1 |
| 445638 | Palmitoleic Acid | CYP26A1 |
| 445638 | Palmitoleic Acid | CYP26B1 |
| 445638 | Palmitoleic Acid | CYP2C19 |
| 445638 | Palmitoleic Acid | CYP51A1 |
| 445638 | Palmitoleic Acid | EDNRA   |
| 445638 | Palmitoleic Acid | ENPP2   |
| 445638 | Palmitoleic Acid | ESR1    |
| 445638 | Palmitoleic Acid | ESR2    |
| 445638 | Palmitoleic Acid | FAAH    |
| 445638 | Palmitoleic Acid | FABP1   |
| 445638 | Palmitoleic Acid | FABP2   |
| 445638 | Palmitoleic Acid | FABP3   |
| 445638 | Palmitoleic Acid | FABP4   |
| 445638 | Palmitoleic Acid | FABP5   |
| 445638 | Palmitoleic Acid | FDFT1   |
| 445638 | Palmitoleic Acid | FFAR1   |
| 445638 | Palmitoleic Acid | FFAR4   |
| 445638 | Palmitoleic Acid | FNTA    |
| 445638 | Palmitoleic Acid | G6PD    |
| 445638 | Palmitoleic Acid | HMGCR   |
| 445638 | Palmitoleic Acid | HNF4A   |
| 445638 | Palmitoleic Acid | HSD11B1 |
| 445638 | Palmitoleic Acid | HSD11B2 |
| 445638 | Palmitoleic Acid | IMPDH2  |
| 445638 | Palmitoleic Acid | LTB4R   |
| 445638 | Palmitoleic Acid | MAPK3   |
| 445638 | Palmitoleic Acid | MCL1    |
| 445638 | Palmitoleic Acid | MDM2    |
| 445638 | Palmitoleic Acid | NOS2    |
| 445638 | Palmitoleic Acid | NPC1L1  |
| 445638 | Palmitoleic Acid | NR1H3   |
| 445638 | Palmitoleic Acid | NR1H4   |
| 445638 | Palmitoleic Acid | NR1I3   |
| 445638 | Palmitoleic Acid | NR3C1   |

|        |                  |          |
|--------|------------------|----------|
| 445638 | Palmitoleic Acid | NR3C2    |
| 445638 | Palmitoleic Acid | OXER1    |
| 445638 | Palmitoleic Acid | PDE4D    |
| 445638 | Palmitoleic Acid | PGR      |
| 445638 | Palmitoleic Acid | PIM2     |
| 445638 | Palmitoleic Acid | PLA2G1B  |
| 445638 | Palmitoleic Acid | POLB     |
| 445638 | Palmitoleic Acid | PPARA    |
| 445638 | Palmitoleic Acid | PPARD    |
| 445638 | Palmitoleic Acid | PPARG    |
| 445638 | Palmitoleic Acid | PREP     |
| 445638 | Palmitoleic Acid | PRKCH    |
| 445638 | Palmitoleic Acid | PTGDR    |
| 445638 | Palmitoleic Acid | PTGDR2   |
| 445638 | Palmitoleic Acid | PTGER1   |
| 445638 | Palmitoleic Acid | PTGER2   |
| 445638 | Palmitoleic Acid | PTGER3   |
| 445638 | Palmitoleic Acid | PTGER4   |
| 445638 | Palmitoleic Acid | PTGES    |
| 445638 | Palmitoleic Acid | PTGIR    |
| 445638 | Palmitoleic Acid | PTGS1    |
| 445638 | Palmitoleic Acid | PTGS2    |
| 445638 | Palmitoleic Acid | PTPN1    |
| 445638 | Palmitoleic Acid | PTPN11   |
| 445638 | Palmitoleic Acid | PTPN2    |
| 445638 | Palmitoleic Acid | PTPN6    |
| 445638 | Palmitoleic Acid | PTPRF    |
| 445638 | Palmitoleic Acid | RORA     |
| 445638 | Palmitoleic Acid | RORC     |
| 445638 | Palmitoleic Acid | SCD      |
| 445638 | Palmitoleic Acid | SERPINA6 |
| 445638 | Palmitoleic Acid | SHBG     |
| 445638 | Palmitoleic Acid | SIGMAR1  |
| 445638 | Palmitoleic Acid | SLC16A1  |
| 445638 | Palmitoleic Acid | SLC22A12 |
| 445638 | Palmitoleic Acid | SLC6A2   |
| 445638 | Palmitoleic Acid | SLC6A3   |
| 445638 | Palmitoleic Acid | SLC6A4   |
| 445638 | Palmitoleic Acid | SRD5A2   |
| 445638 | Palmitoleic Acid | TERT     |
| 445638 | Palmitoleic Acid | THRA     |
| 445638 | Palmitoleic Acid | THRB     |
| 445638 | Palmitoleic Acid | TOP1     |
| 445638 | Palmitoleic Acid | TOP2A    |

|        |                  |        |
|--------|------------------|--------|
| 445638 | Palmitoleic Acid | TRPM8  |
| 445638 | Palmitoleic Acid | TRPV1  |
| 160875 | Asimilobine      | ABAT   |
| 160875 | Asimilobine      | ABCB1  |
| 160875 | Asimilobine      | ADCY5  |
| 160875 | Asimilobine      | ADRA1A |
| 160875 | Asimilobine      | ADRA1B |
| 160875 | Asimilobine      | ADRA1D |
| 160875 | Asimilobine      | ADRA2A |
| 160875 | Asimilobine      | ADRA2B |
| 160875 | Asimilobine      | ADRA2C |
| 160875 | Asimilobine      | ADRB1  |
| 160875 | Asimilobine      | ADRB2  |
| 160875 | Asimilobine      | ADRB3  |
| 160875 | Asimilobine      | ALOX12 |
| 160875 | Asimilobine      | ALOX15 |
| 160875 | Asimilobine      | AOC3   |
| 160875 | Asimilobine      | CCL2   |
| 160875 | Asimilobine      | CDK9   |
| 160875 | Asimilobine      | CHRNA3 |
| 160875 | Asimilobine      | CHRNA4 |
| 160875 | Asimilobine      | CHRNA4 |
| 160875 | Asimilobine      | CHRNA7 |
| 160875 | Asimilobine      | CHRNB1 |
| 160875 | Asimilobine      | CHRNB3 |
| 160875 | Asimilobine      | CTSC   |
| 160875 | Asimilobine      | CYP1A2 |
| 160875 | Asimilobine      | DPP4   |
| 160875 | Asimilobine      | DPP9   |
| 160875 | Asimilobine      | DRD1   |
| 160875 | Asimilobine      | DRD2   |
| 160875 | Asimilobine      | DRD3   |
| 160875 | Asimilobine      | DRD4   |
| 160875 | Asimilobine      | DRD5   |
| 160875 | Asimilobine      | DYRK2  |
| 160875 | Asimilobine      | F3     |
| 160875 | Asimilobine      | FAP    |
| 160875 | Asimilobine      | GABBR2 |
| 160875 | Asimilobine      | GABRA1 |
| 160875 | Asimilobine      | GABRA2 |
| 160875 | Asimilobine      | GABRA3 |
| 160875 | Asimilobine      | GABRR1 |
| 160875 | Asimilobine      | HASPIN |
| 160875 | Asimilobine      | HRH2   |

|        |             |         |
|--------|-------------|---------|
| 160875 | Asimilobine | HTR1A   |
| 160875 | Asimilobine | HTR1B   |
| 160875 | Asimilobine | HTR1D   |
| 160875 | Asimilobine | HTR1E   |
| 160875 | Asimilobine | HTR1F   |
| 160875 | Asimilobine | HTR2A   |
| 160875 | Asimilobine | HTR2B   |
| 160875 | Asimilobine | HTR2C   |
| 160875 | Asimilobine | HTR3A   |
| 160875 | Asimilobine | HTR4    |
| 160875 | Asimilobine | HTR5A   |
| 160875 | Asimilobine | HTR6    |
| 160875 | Asimilobine | HTR7    |
| 160875 | Asimilobine | IDO1    |
| 160875 | Asimilobine | IKBKB   |
| 160875 | Asimilobine | KAT2B   |
| 160875 | Asimilobine | KCNH2   |
| 160875 | Asimilobine | KISS1R  |
| 160875 | Asimilobine | LTA4H   |
| 160875 | Asimilobine | MAOA    |
| 160875 | Asimilobine | MAPK8   |
| 160875 | Asimilobine | MYLK    |
| 160875 | Asimilobine | NOS2    |
| 160875 | Asimilobine | NR4A1   |
| 160875 | Asimilobine | OPRD1   |
| 160875 | Asimilobine | OPRK1   |
| 160875 | Asimilobine | OPRM1   |
| 160875 | Asimilobine | PHLPP2  |
| 160875 | Asimilobine | PKN1    |
| 160875 | Asimilobine | PKN2    |
| 160875 | Asimilobine | PLA2G2A |
| 160875 | Asimilobine | PRKCE   |
| 160875 | Asimilobine | PRKX    |
| 160875 | Asimilobine | PTPRCAP |
| 160875 | Asimilobine | QDPR    |
| 160875 | Asimilobine | RCOR1   |
| 160875 | Asimilobine | ROCK1   |
| 160875 | Asimilobine | ROCK2   |
| 160875 | Asimilobine | ROCK2   |
| 160875 | Asimilobine | RPS6KA5 |
| 160875 | Asimilobine | SCN2A   |
| 160875 | Asimilobine | SCN4A   |
| 160875 | Asimilobine | SIGMAR1 |
| 160875 | Asimilobine | SLC6A1  |

|         |             |         |
|---------|-------------|---------|
| 160875  | Asimilobine | SLC6A11 |
| 160875  | Asimilobine | SLC6A13 |
| 160875  | Asimilobine | SLC6A3  |
| 160875  | Asimilobine | SLC6A4  |
| 160875  | Asimilobine | TAAR1   |
| 160875  | Asimilobine | TBXA2R  |
| 160875  | Asimilobine | TH      |
| 160875  | Asimilobine | TNKS2   |
| 160875  | Asimilobine | TSPO    |
| 289     | Catechol    | CA1     |
| 289     | Catechol    | CA12    |
| 289     | Catechol    | CA2     |
| 289     | Catechol    | CA3     |
| 289     | Catechol    | CA4     |
| 289     | Catechol    | CA5A    |
| 289     | Catechol    | CA5B    |
| 289     | Catechol    | CA6     |
| 289     | Catechol    | CA9     |
| 289     | Catechol    | EGFR    |
| 289     | Catechol    | FYN     |
| 289     | Catechol    | IDO1    |
| 289     | Catechol    | PTPN22  |
| 5281707 | coumestrol  | ABCC1   |
| 5281707 | coumestrol  | ACHE    |
| 5281707 | coumestrol  | AHR     |
| 5281707 | coumestrol  | AKR1B1  |
| 5281707 | coumestrol  | AKT1    |
| 5281707 | coumestrol  | ALOX12  |
| 5281707 | coumestrol  | ALOX5   |
| 5281707 | coumestrol  | APP     |
| 5281707 | coumestrol  | ARG1    |
| 5281707 | coumestrol  | AURKA   |
| 5281707 | coumestrol  | AURKB   |
| 5281707 | coumestrol  | BACE1   |
| 5281707 | coumestrol  | CA1     |
| 5281707 | coumestrol  | CA12    |
| 5281707 | coumestrol  | CA13    |
| 5281707 | coumestrol  | CA14    |
| 5281707 | coumestrol  | CA2     |
| 5281707 | coumestrol  | CA4     |
| 5281707 | coumestrol  | CA5A    |
| 5281707 | coumestrol  | CA6     |
| 5281707 | coumestrol  | CA7     |
| 5281707 | coumestrol  | CA9     |

|         |            |          |
|---------|------------|----------|
| 5281707 | coumestrol | CBR1     |
| 5281707 | coumestrol | CCNB3    |
| 5281707 | coumestrol | CCND1    |
| 5281707 | coumestrol | CD38     |
| 5281707 | coumestrol | CDK2     |
| 5281707 | coumestrol | CDK2     |
| 5281707 | coumestrol | CDK5R1   |
| 5281707 | coumestrol | CDK6     |
| 5281707 | coumestrol | CFTR     |
| 5281707 | coumestrol | CRHR1    |
| 5281707 | coumestrol | CSNK2A1  |
| 5281707 | coumestrol | DRD3     |
| 5281707 | coumestrol | EGFR     |
| 5281707 | coumestrol | EPHB4    |
| 5281707 | coumestrol | ESR1     |
| 5281707 | coumestrol | ESR2     |
| 5281707 | coumestrol | FGR      |
| 5281707 | coumestrol | FLT3     |
| 5281707 | coumestrol | FLT4     |
| 5281707 | coumestrol | GLO1     |
| 5281707 | coumestrol | GPR35    |
| 5281707 | coumestrol | GSK3B    |
| 5281707 | coumestrol | GSR      |
| 5281707 | coumestrol | HSD17B2  |
| 5281707 | coumestrol | HSP90AA1 |
| 5281707 | coumestrol | IGF1R    |
| 5281707 | coumestrol | KDR      |
| 5281707 | coumestrol | LYN      |
| 5281707 | coumestrol | MAOA     |
| 5281707 | coumestrol | MAP3K8   |
| 5281707 | coumestrol | MET      |
| 5281707 | coumestrol | MMP12    |
| 5281707 | coumestrol | MMP2     |
| 5281707 | coumestrol | MMP9     |
| 5281707 | coumestrol | NFKB1    |
| 5281707 | coumestrol | NOX4     |
| 5281707 | coumestrol | NUAK1    |
| 5281707 | coumestrol | PARP1    |
| 5281707 | coumestrol | PDGFRB   |
| 5281707 | coumestrol | PFKFB3   |
| 5281707 | coumestrol | PLK1     |
| 5281707 | coumestrol | PLK4     |
| 5281707 | coumestrol | PTGS2    |
| 5281707 | coumestrol | PTK2     |



|          |                 |         |
|----------|-----------------|---------|
| 5281707  | coumestrol      | PTP4A3  |
| 5281707  | coumestrol      | PTPRS   |
| 5281707  | coumestrol      | SQLE    |
| 5281707  | coumestrol      | SRC     |
| 5281707  | coumestrol      | SYK     |
| 5281707  | coumestrol      | TEK     |
| 5281707  | coumestrol      | TERT    |
| 5281707  | coumestrol      | TNKS    |
| 5281707  | coumestrol      | TNKS2   |
| 5281707  | coumestrol      | TOP1    |
| 5281707  | coumestrol      | TTR     |
| 5281707  | coumestrol      | TYR     |
| 5281707  | coumestrol      | XDH     |
| 21672700 | Colubrinic Acid | ACE     |
| 21672700 | Colubrinic Acid | ACP1    |
| 21672700 | Colubrinic Acid | AGTR1   |
| 21672700 | Colubrinic Acid | AKR1B10 |
| 21672700 | Colubrinic Acid | ALOX5AP |
| 21672700 | Colubrinic Acid | AMPD2   |
| 21672700 | Colubrinic Acid | AR      |
| 21672700 | Colubrinic Acid | CD81    |
| 21672700 | Colubrinic Acid | CDC25A  |
| 21672700 | Colubrinic Acid | CDC25C  |
| 21672700 | Colubrinic Acid | CES2    |
| 21672700 | Colubrinic Acid | CYP17A1 |
| 21672700 | Colubrinic Acid | CYP19A1 |
| 21672700 | Colubrinic Acid | CYP51A1 |
| 21672700 | Colubrinic Acid | FABP1   |
| 21672700 | Colubrinic Acid | GABBR1  |
| 21672700 | Colubrinic Acid | GPBAR1  |
| 21672700 | Colubrinic Acid | HMGCR   |
| 21672700 | Colubrinic Acid | HSD11B1 |
| 21672700 | Colubrinic Acid | HSD17B3 |
| 21672700 | Colubrinic Acid | MDM2    |
| 21672700 | Colubrinic Acid | MMP1    |
| 21672700 | Colubrinic Acid | MMP2    |
| 21672700 | Colubrinic Acid | MMP3    |
| 21672700 | Colubrinic Acid | NPC1L1  |
| 21672700 | Colubrinic Acid | NR1H4   |
| 21672700 | Colubrinic Acid | NR3C1   |
| 21672700 | Colubrinic Acid | PGR     |
| 21672700 | Colubrinic Acid | PLA2G4A |
| 21672700 | Colubrinic Acid | POLB    |
| 21672700 | Colubrinic Acid | PPARG   |

|          |                                          |         |
|----------|------------------------------------------|---------|
| 21672700 | Colubrinic Acid                          | PREP    |
| 21672700 | Colubrinic Acid                          | PTGER1  |
| 21672700 | Colubrinic Acid                          | PTGER2  |
| 21672700 | Colubrinic Acid                          | PTGER4  |
| 21672700 | Colubrinic Acid                          | PTGES   |
| 21672700 | Colubrinic Acid                          | PTGS2   |
| 21672700 | Colubrinic Acid                          | PTPN1   |
| 21672700 | Colubrinic Acid                          | PTPN11  |
| 21672700 | Colubrinic Acid                          | PTPN2   |
| 21672700 | Colubrinic Acid                          | PTPRF   |
| 21672700 | Colubrinic Acid                          | RARG    |
| 21672700 | Colubrinic Acid                          | RORC    |
| 21672700 | Colubrinic Acid                          | RXRG    |
| 21672700 | Colubrinic Acid                          | SAE1    |
| 21672700 | Colubrinic Acid                          | SCD     |
| 21672700 | Colubrinic Acid                          | SIGMAR1 |
| 21672700 | Colubrinic Acid                          | TERT    |
| 21672700 | Colubrinic Acid                          | THRA    |
| 21672700 | Colubrinic Acid                          | THRB    |
| 21672700 | Colubrinic Acid                          | TOP1    |
| 21672700 | Colubrinic Acid                          | TOP2A   |
| 21672700 | Colubrinic Acid                          | UGT2B7  |
| 21672700 | Colubrinic Acid                          | VDR     |
| 73659    | 2Î°,3Î°-Dihydroxyolean-12-En-28-Oic Acid | ACP1    |
| 73659    | 2Î°,3Î°-Dihydroxyolean-12-En-28-Oic Acid | AGTR1   |
| 73659    | 2Î°,3Î°-Dihydroxyolean-12-En-28-Oic Acid | AKR1B10 |
| 73659    | 2Î°,3Î°-Dihydroxyolean-12-En-28-Oic Acid | ALOX5   |
| 73659    | 2Î°,3Î°-Dihydroxyolean-12-En-28-Oic Acid | ALOX5AP |
| 73659    | 2Î°,3Î°-Dihydroxyolean-12-En-28-Oic Acid | AR      |
| 73659    | 2Î°,3Î°-Dihydroxyolean-12-En-28-Oic Acid | BACE1   |
| 73659    | 2Î°,3Î°-Dihydroxyolean-12-En-28-Oic Acid | BCHE    |
| 73659    | 2Î°,3Î°-Dihydroxyolean-12-En-28-Oic Acid | CD81    |
| 73659    | 2Î°,3Î°-Dihydroxyolean-12-En-28-Oic Acid | CDC25A  |

|       |                                          |         |
|-------|------------------------------------------|---------|
| 73659 | 2Î°,3Î°-Dihydroxyolean-12-En-28-Oic Acid | CDC25B  |
| 73659 | 2Î°,3Î°-Dihydroxyolean-12-En-28-Oic Acid | CES2    |
| 73659 | 2Î°,3Î°-Dihydroxyolean-12-En-28-Oic Acid | CHRM2   |
| 73659 | 2Î°,3Î°-Dihydroxyolean-12-En-28-Oic Acid | CYP17A1 |
| 73659 | 2Î°,3Î°-Dihydroxyolean-12-En-28-Oic Acid | CYP19A1 |
| 73659 | 2Î°,3Î°-Dihydroxyolean-12-En-28-Oic Acid | CYP51A1 |
| 73659 | 2Î°,3Î°-Dihydroxyolean-12-En-28-Oic Acid | ESR1    |
| 73659 | 2Î°,3Î°-Dihydroxyolean-12-En-28-Oic Acid | ESR2    |
| 73659 | 2Î°,3Î°-Dihydroxyolean-12-En-28-Oic Acid | FAAH    |
| 73659 | 2Î°,3Î°-Dihydroxyolean-12-En-28-Oic Acid | FABP1   |
| 73659 | 2Î°,3Î°-Dihydroxyolean-12-En-28-Oic Acid | FABP3   |
| 73659 | 2Î°,3Î°-Dihydroxyolean-12-En-28-Oic Acid | FABP4   |
| 73659 | 2Î°,3Î°-Dihydroxyolean-12-En-28-Oic Acid | FABP5   |
| 73659 | 2Î°,3Î°-Dihydroxyolean-12-En-28-Oic Acid | FFAR1   |
| 73659 | 2Î°,3Î°-Dihydroxyolean-12-En-28-Oic Acid | FNTA    |
| 73659 | 2Î°,3Î°-Dihydroxyolean-12-En-28-Oic Acid | G6PD    |
| 73659 | 2Î°,3Î°-Dihydroxyolean-12-En-28-Oic Acid | GPBAR1  |
| 73659 | 2Î°,3Î°-Dihydroxyolean-12-En-28-Oic Acid | GRIK1   |
| 73659 | 2Î°,3Î°-Dihydroxyolean-12-En-28-Oic Acid | GRIK2   |
| 73659 | 2Î°,3Î°-Dihydroxyolean-12-En-28-Oic Acid | HMGCR   |
| 73659 | 2Î°,3Î°-Dihydroxyolean-12-En-28-Oic Acid | HSD11B1 |
| 73659 | 2Î°,3Î°-Dihydroxyolean-12-En-28-Oic Acid | HSD11B2 |

|       |                                          |         |
|-------|------------------------------------------|---------|
| 73659 | 2Î°,3Î°-Dihydroxyolean-12-En-28-Oic Acid | LTB4R   |
| 73659 | 2Î°,3Î°-Dihydroxyolean-12-En-28-Oic Acid | MDM2    |
| 73659 | 2Î°,3Î°-Dihydroxyolean-12-En-28-Oic Acid | NOS2    |
| 73659 | 2Î°,3Î°-Dihydroxyolean-12-En-28-Oic Acid | NR1H3   |
| 73659 | 2Î°,3Î°-Dihydroxyolean-12-En-28-Oic Acid | NR1H4   |
| 73659 | 2Î°,3Î°-Dihydroxyolean-12-En-28-Oic Acid | NR3C1   |
| 73659 | 2Î°,3Î°-Dihydroxyolean-12-En-28-Oic Acid | NR3C2   |
| 73659 | 2Î°,3Î°-Dihydroxyolean-12-En-28-Oic Acid | PDE4D   |
| 73659 | 2Î°,3Î°-Dihydroxyolean-12-En-28-Oic Acid | PGR     |
| 73659 | 2Î°,3Î°-Dihydroxyolean-12-En-28-Oic Acid | PLA2G1B |
| 73659 | 2Î°,3Î°-Dihydroxyolean-12-En-28-Oic Acid | POLB    |
| 73659 | 2Î°,3Î°-Dihydroxyolean-12-En-28-Oic Acid | PPARA   |
| 73659 | 2Î°,3Î°-Dihydroxyolean-12-En-28-Oic Acid | PPARD   |
| 73659 | 2Î°,3Î°-Dihydroxyolean-12-En-28-Oic Acid | PPARG   |
| 73659 | 2Î°,3Î°-Dihydroxyolean-12-En-28-Oic Acid | PREP    |
| 73659 | 2Î°,3Î°-Dihydroxyolean-12-En-28-Oic Acid | PRKCH   |
| 73659 | 2Î°,3Î°-Dihydroxyolean-12-En-28-Oic Acid | PTGDR2  |
| 73659 | 2Î°,3Î°-Dihydroxyolean-12-En-28-Oic Acid | PTGER1  |
| 73659 | 2Î°,3Î°-Dihydroxyolean-12-En-28-Oic Acid | PTGER2  |
| 73659 | 2Î°,3Î°-Dihydroxyolean-12-En-28-Oic Acid | PTGER4  |
| 73659 | 2Î°,3Î°-Dihydroxyolean-12-En-28-Oic Acid | PTGES   |
| 73659 | 2Î°,3Î°-Dihydroxyolean-12-En-28-Oic Acid | PTGIR   |

|       |                                          |          |
|-------|------------------------------------------|----------|
| 73659 | 2Î°,3Î°-Dihydroxyolean-12-En-28-Oic Acid | PTGS1    |
| 73659 | 2Î°,3Î°-Dihydroxyolean-12-En-28-Oic Acid | PTGS2    |
| 73659 | 2Î°,3Î°-Dihydroxyolean-12-En-28-Oic Acid | PTPN1    |
| 73659 | 2Î°,3Î°-Dihydroxyolean-12-En-28-Oic Acid | PTPN11   |
| 73659 | 2Î°,3Î°-Dihydroxyolean-12-En-28-Oic Acid | PTPN2    |
| 73659 | 2Î°,3Î°-Dihydroxyolean-12-En-28-Oic Acid | PTPN6    |
| 73659 | 2Î°,3Î°-Dihydroxyolean-12-En-28-Oic Acid | PTPRF    |
| 73659 | 2Î°,3Î°-Dihydroxyolean-12-En-28-Oic Acid | RORA     |
| 73659 | 2Î°,3Î°-Dihydroxyolean-12-En-28-Oic Acid | RORC     |
| 73659 | 2Î°,3Î°-Dihydroxyolean-12-En-28-Oic Acid | SCD      |
| 73659 | 2Î°,3Î°-Dihydroxyolean-12-En-28-Oic Acid | SERPINA6 |
| 73659 | 2Î°,3Î°-Dihydroxyolean-12-En-28-Oic Acid | SHBG     |
| 73659 | 2Î°,3Î°-Dihydroxyolean-12-En-28-Oic Acid | SLC10A1  |
| 73659 | 2Î°,3Î°-Dihydroxyolean-12-En-28-Oic Acid | SLC10A2  |
| 73659 | 2Î°,3Î°-Dihydroxyolean-12-En-28-Oic Acid | SLC6A3   |
| 73659 | 2Î°,3Î°-Dihydroxyolean-12-En-28-Oic Acid | SLC6A4   |
| 73659 | 2Î°,3Î°-Dihydroxyolean-12-En-28-Oic Acid | SRD5A2   |
| 73659 | 2Î°,3Î°-Dihydroxyolean-12-En-28-Oic Acid | TERT     |
| 73659 | 2Î°,3Î°-Dihydroxyolean-12-En-28-Oic Acid | TLR9     |
| 73659 | 2Î°,3Î°-Dihydroxyolean-12-En-28-Oic Acid | TOP1     |
| 73659 | 2Î°,3Î°-Dihydroxyolean-12-En-28-Oic Acid | TOP2A    |
| 1130  | Vitamin B1                               | ABCC1    |
| 1130  | Vitamin B1                               | ABCG2    |

|         |             |         |
|---------|-------------|---------|
| 1130    | Vitamin B1  | ADAMTS5 |
| 1130    | Vitamin B1  | AKR1C3  |
| 1130    | Vitamin B1  | BCL2    |
| 1130    | Vitamin B1  | CA1     |
| 1130    | Vitamin B1  | CA2     |
| 1130    | Vitamin B1  | CHRM1   |
| 1130    | Vitamin B1  | CHRM2   |
| 1130    | Vitamin B1  | CHRM3   |
| 1130    | Vitamin B1  | CSF1R   |
| 1130    | Vitamin B1  | CTSL    |
| 1130    | Vitamin B1  | CTSV    |
| 1130    | Vitamin B1  | CYP26A1 |
| 1130    | Vitamin B1  | CYP26B1 |
| 1130    | Vitamin B1  | FABP4   |
| 1130    | Vitamin B1  | GRIN1   |
| 1130    | Vitamin B1  | GRM2    |
| 1130    | Vitamin B1  | HCAR2   |
| 1130    | Vitamin B1  | HPGD    |
| 1130    | Vitamin B1  | MAPK8   |
| 1130    | Vitamin B1  | MCL1    |
| 1130    | Vitamin B1  | MDM2    |
| 1130    | Vitamin B1  | METAP2  |
| 1130    | Vitamin B1  | MMP1    |
| 1130    | Vitamin B1  | MMP14   |
| 1130    | Vitamin B1  | NR1H4   |
| 1130    | Vitamin B1  | PPARA   |
| 1130    | Vitamin B1  | PPARD   |
| 1130    | Vitamin B1  | PPARG   |
| 1130    | Vitamin B1  | PTGER1  |
| 1130    | Vitamin B1  | RBP4    |
| 1130    | Vitamin B1  | TKT     |
| 6443026 | Mauritine D | ABL1    |
| 6443026 | Mauritine D | ACACA   |
| 6443026 | Mauritine D | ACACB   |
| 6443026 | Mauritine D | ADRA2A  |
| 6443026 | Mauritine D | ADRA2B  |
| 6443026 | Mauritine D | AHCY    |
| 6443026 | Mauritine D | ALK     |
| 6443026 | Mauritine D | AURKB   |
| 6443026 | Mauritine D | BAD     |
| 6443026 | Mauritine D | BCL2    |
| 6443026 | Mauritine D | BIRC8   |
| 6443026 | Mauritine D | BLK     |
| 6443026 | Mauritine D | BRAF    |

|         |             |         |
|---------|-------------|---------|
| 6443026 | Mauritine D | BTK     |
| 6443026 | Mauritine D | CCR3    |
| 6443026 | Mauritine D | CCR4    |
| 6443026 | Mauritine D | CDK1    |
| 6443026 | Mauritine D | CDK2    |
| 6443026 | Mauritine D | CNR2    |
| 6443026 | Mauritine D | CSF1R   |
| 6443026 | Mauritine D | CXCR4   |
| 6443026 | Mauritine D | DRD1    |
| 6443026 | Mauritine D | DRD3    |
| 6443026 | Mauritine D | EGFR    |
| 6443026 | Mauritine D | EPHA2   |
| 6443026 | Mauritine D | ERBB2   |
| 6443026 | Mauritine D | ERN1    |
| 6443026 | Mauritine D | ESR2    |
| 6443026 | Mauritine D | FGFR1   |
| 6443026 | Mauritine D | FLT1    |
| 6443026 | Mauritine D | FLT3    |
| 6443026 | Mauritine D | FLT4    |
| 6443026 | Mauritine D | GNRHR   |
| 6443026 | Mauritine D | GRK7    |
| 6443026 | Mauritine D | GSK3B   |
| 6443026 | Mauritine D | HCN1    |
| 6443026 | Mauritine D | HCN4    |
| 6443026 | Mauritine D | HIPK4   |
| 6443026 | Mauritine D | HTR1D   |
| 6443026 | Mauritine D | HTR6    |
| 6443026 | Mauritine D | ICK     |
| 6443026 | Mauritine D | IDH1    |
| 6443026 | Mauritine D | IGF1R   |
| 6443026 | Mauritine D | IKBKB   |
| 6443026 | Mauritine D | IKBKG   |
| 6443026 | Mauritine D | INSR    |
| 6443026 | Mauritine D | JAK2    |
| 6443026 | Mauritine D | JAK3    |
| 6443026 | Mauritine D | KCNA5   |
| 6443026 | Mauritine D | KCNJ5   |
| 6443026 | Mauritine D | KDR     |
| 6443026 | Mauritine D | KIT     |
| 6443026 | Mauritine D | LRRK2   |
| 6443026 | Mauritine D | MAP2K3  |
| 6443026 | Mauritine D | MAP3K12 |
| 6443026 | Mauritine D | MAP3K13 |
| 6443026 | Mauritine D | MAP3K15 |

|         |             |         |
|---------|-------------|---------|
| 6443026 | Mauritine D | MAPK14  |
| 6443026 | Mauritine D | MAPK8   |
| 6443026 | Mauritine D | MAST1   |
| 6443026 | Mauritine D | MC5R    |
| 6443026 | Mauritine D | MCHR1   |
| 6443026 | Mauritine D | MET     |
| 6443026 | Mauritine D | NPY1R   |
| 6443026 | Mauritine D | NPY2R   |
| 6443026 | Mauritine D | NPY5R   |
| 6443026 | Mauritine D | OPRL1   |
| 6443026 | Mauritine D | OXSR1   |
| 6443026 | Mauritine D | PARP1   |
| 6443026 | Mauritine D | PDE11A  |
| 6443026 | Mauritine D | PDE4B   |
| 6443026 | Mauritine D | PDE4D   |
| 6443026 | Mauritine D | PDE5A   |
| 6443026 | Mauritine D | PDGFRA  |
| 6443026 | Mauritine D | PDGFRB  |
| 6443026 | Mauritine D | PHKG2   |
| 6443026 | Mauritine D | PIK3CD  |
| 6443026 | Mauritine D | PLK1    |
| 6443026 | Mauritine D | PLK4    |
| 6443026 | Mauritine D | PRCP    |
| 6443026 | Mauritine D | PRKAA2  |
| 6443026 | Mauritine D | PRKCA   |
| 6443026 | Mauritine D | PRKCB   |
| 6443026 | Mauritine D | PRKCD   |
| 6443026 | Mauritine D | PRKCG   |
| 6443026 | Mauritine D | PRKCZ   |
| 6443026 | Mauritine D | PRPF4B  |
| 6443026 | Mauritine D | PTPN22  |
| 6443026 | Mauritine D | RET     |
| 6443026 | Mauritine D | RPS6KA3 |
| 6443026 | Mauritine D | SBK1    |
| 6443026 | Mauritine D | SLC10A2 |
| 6443026 | Mauritine D | SSTR3   |
| 6443026 | Mauritine D | STK39   |
| 6443026 | Mauritine D | TACR3   |
| 6443026 | Mauritine D | TBK1    |
| 6443026 | Mauritine D | TGFBR1  |
| 6443026 | Mauritine D | TUBB1   |
| 6443026 | Mauritine D | VDR     |
| 6443026 | Mauritine D | YES1    |
| 2353    | berberine   | CYP2D6  |



|      |           |         |
|------|-----------|---------|
| 2353 | berberine | ABL1    |
| 2353 | berberine | ACHE    |
| 2353 | berberine | ADRA2B  |
| 2353 | berberine | ADRA2C  |
| 2353 | berberine | ALOX5AP |
| 2353 | berberine | AURKA   |
| 2353 | berberine | AURKB   |
| 2353 | berberine | BCAT2   |
| 2353 | berberine | BCHE    |
| 2353 | berberine | CCNA2   |
| 2353 | berberine | CDC25B  |
| 2353 | berberine | CDC42   |
| 2353 | berberine | CDK2    |
| 2353 | berberine | CDK4    |
| 2353 | berberine | CHEK1   |
| 2353 | berberine | CHEK2   |
| 2353 | berberine | CHRM1   |
| 2353 | berberine | CHRM4   |
| 2353 | berberine | CSF1R   |
| 2353 | berberine | CYP11B1 |
| 2353 | berberine | CYP11B2 |
| 2353 | berberine | DHFR    |
| 2353 | berberine | EPHB4   |
| 2353 | berberine | EPHX2   |
| 2353 | berberine | F3      |
| 2353 | berberine | FLT3    |
| 2353 | berberine | GABRB3  |
| 2353 | berberine | GABRB3  |
| 2353 | berberine | GABRB3  |
| 2353 | berberine | GRIA1   |
| 2353 | berberine | HCRTR2  |
| 2353 | berberine | HPGD    |
| 2353 | berberine | HSD11B1 |
| 2353 | berberine | HSD17B1 |
| 2353 | berberine | HSD17B2 |
| 2353 | berberine | HTR2B   |
| 2353 | berberine | HTR3A   |
| 2353 | berberine | ICAM1   |
| 2353 | berberine | IKBKB   |
| 2353 | berberine | JAK2    |
| 2353 | berberine | KIT     |
| 2353 | berberine | LCK     |
| 2353 | berberine | LIMK1   |
| 2353 | berberine | LYN     |

|           |           |          |
|-----------|-----------|----------|
| 2353      | berberine | MAOB     |
| 2353      | berberine | MAP2K1   |
| 2353      | berberine | MAPK14   |
| 2353      | berberine | MAPK8    |
| 2353      | berberine | MAPKAPK2 |
| 2353      | berberine | MET      |
| 2353      | berberine | MKNK1    |
| 2353      | berberine | NTRK1    |
| 2353      | berberine | PARP10   |
| 2353      | berberine | PARP2    |
| 2353      | berberine | PFKFB3   |
| 2353      | berberine | PIK3CB   |
| 2353      | berberine | PIK3CD   |
| 2353      | berberine | PIK3CG   |
| 2353      | berberine | PIM1     |
| 2353      | berberine | PPIA     |
| 2353      | berberine | PRF1     |
| 2353      | berberine | PTGS2    |
| 2353      | berberine | PTPN1    |
| 2353      | berberine | RAC1     |
| 2353      | berberine | ROCK2    |
| 2353      | berberine | RPS27    |
| 2353      | berberine | RPS6KB1  |
| 2353      | berberine | SAE1     |
| 2353      | berberine | SCN4A    |
| 2353      | berberine | SELE     |
| 2353      | berberine | SIGMAR1  |
| 2353      | berberine | SLC1A3   |
| 2353      | berberine | SRC      |
| 2353      | berberine | TBXAS1   |
| 2353      | berberine | TEK      |
| 2353      | berberine | TRPC6    |
| 2353      | berberine | TRPM8    |
| 2353      | berberine | TYMS     |
| 2353      | berberine | ZAP70    |
| 101650325 | Ruvoside  | ATP12A   |
| 101650325 | Ruvoside  | ATP1A1   |
| 101650325 | Ruvoside  | BACE1    |
| 101650325 | Ruvoside  | BCL2L1   |
| 101650325 | Ruvoside  | CDC25A   |
| 101650325 | Ruvoside  | CDC25B   |
| 101650325 | Ruvoside  | CTSD     |
| 101650325 | Ruvoside  | F2RL1    |
| 101650325 | Ruvoside  | GLRA1    |

|           |            |         |
|-----------|------------|---------|
| 101650325 | Ruvoside   | GLRA2   |
| 101650325 | Ruvoside   | IARS    |
| 101650325 | Ruvoside   | KMT5A   |
| 101650325 | Ruvoside   | PLA2G1B |
| 101650325 | Ruvoside   | PPP2CA  |
| 101650325 | Ruvoside   | PRKCD   |
| 101650325 | Ruvoside   | PRKCE   |
| 101650325 | Ruvoside   | PRKCH   |
| 101650325 | Ruvoside   | PRKCQ   |
| 101650325 | Ruvoside   | PTPA    |
| 101650325 | Ruvoside   | PTPN1   |
| 101650325 | Ruvoside   | RORC    |
| 101650325 | Ruvoside   | RPS6KA5 |
| 101650325 | Ruvoside   | STAT3   |
| 101650325 | Ruvoside   | SYK     |
| 10146     | Nuciferine | CYP2D6  |
| 10146     | Nuciferine | ABCB1   |
| 10146     | Nuciferine | ADORA3  |
| 10146     | Nuciferine | ADRA1A  |
| 10146     | Nuciferine | ADRA1B  |
| 10146     | Nuciferine | ADRA1D  |
| 10146     | Nuciferine | ADRA2A  |
| 10146     | Nuciferine | ADRA2B  |
| 10146     | Nuciferine | ADRA2C  |
| 10146     | Nuciferine | ADRB1   |
| 10146     | Nuciferine | ALOX12  |
| 10146     | Nuciferine | ALOX15  |
| 10146     | Nuciferine | BIRC2   |
| 10146     | Nuciferine | CDK2    |
| 10146     | Nuciferine | CDK9    |
| 10146     | Nuciferine | CHRM1   |
| 10146     | Nuciferine | CHRM2   |
| 10146     | Nuciferine | CHRM3   |
| 10146     | Nuciferine | CHRM4   |
| 10146     | Nuciferine | CHRNA3  |
| 10146     | Nuciferine | CHRNA4  |
| 10146     | Nuciferine | CHRNA7  |
| 10146     | Nuciferine | CHRNB1  |
| 10146     | Nuciferine | CHRNB3  |
| 10146     | Nuciferine | CYP1A2  |
| 10146     | Nuciferine | DPP4    |
| 10146     | Nuciferine | DRD1    |
| 10146     | Nuciferine | DRD2    |
| 10146     | Nuciferine | DRD3    |

|       |            |         |
|-------|------------|---------|
| 10146 | Nuciferine | DRD4    |
| 10146 | Nuciferine | DRD5    |
| 10146 | Nuciferine | EGFR    |
| 10146 | Nuciferine | F3      |
| 10146 | Nuciferine | FDFT1   |
| 10146 | Nuciferine | FLT3    |
| 10146 | Nuciferine | HASPIN  |
| 10146 | Nuciferine | HPGDS   |
| 10146 | Nuciferine | HRH2    |
| 10146 | Nuciferine | HRH4    |
| 10146 | Nuciferine | HTR1A   |
| 10146 | Nuciferine | HTR1B   |
| 10146 | Nuciferine | HTR1D   |
| 10146 | Nuciferine | HTR1E   |
| 10146 | Nuciferine | HTR1F   |
| 10146 | Nuciferine | HTR2A   |
| 10146 | Nuciferine | HTR2B   |
| 10146 | Nuciferine | HTR2C   |
| 10146 | Nuciferine | HTR3A   |
| 10146 | Nuciferine | HTR5A   |
| 10146 | Nuciferine | HTR6    |
| 10146 | Nuciferine | HTR7    |
| 10146 | Nuciferine | IRAK4   |
| 10146 | Nuciferine | JAK2    |
| 10146 | Nuciferine | KCNH2   |
| 10146 | Nuciferine | LTA4H   |
| 10146 | Nuciferine | MAOA    |
| 10146 | Nuciferine | MET     |
| 10146 | Nuciferine | NOS2    |
| 10146 | Nuciferine | NR4A1   |
| 10146 | Nuciferine | OPRD1   |
| 10146 | Nuciferine | OPRK1   |
| 10146 | Nuciferine | OPRM1   |
| 10146 | Nuciferine | PHLPP2  |
| 10146 | Nuciferine | PIM1    |
| 10146 | Nuciferine | PIM2    |
| 10146 | Nuciferine | PRKCQ   |
| 10146 | Nuciferine | PTGS2   |
| 10146 | Nuciferine | PTPRCAP |
| 10146 | Nuciferine | ROCK1   |
| 10146 | Nuciferine | ROCK2   |
| 10146 | Nuciferine | SCN4A   |
| 10146 | Nuciferine | SIGMAR1 |
| 10146 | Nuciferine | SLC6A3  |

|       |            |         |
|-------|------------|---------|
| 10146 | Nuciferine | SLC6A4  |
| 10146 | Nuciferine | SSTR1   |
| 10146 | Nuciferine | SSTR4   |
| 10146 | Nuciferine | TBXA2R  |
| 10146 | Nuciferine | TH      |
| 10146 | Nuciferine | THRA    |
| 10146 | Nuciferine | THRB    |
| 10146 | Nuciferine | TSPO    |
| 10146 | Nuciferine | XIAP    |
| 4970  | Fumarine   | ADRA1A  |
| 4970  | Fumarine   | ADRA1B  |
| 4970  | Fumarine   | ADRA1D  |
| 4970  | Fumarine   | APP     |
| 4970  | Fumarine   | CCNE1   |
| 4970  | Fumarine   | CDC7    |
| 4970  | Fumarine   | CDK2    |
| 4970  | Fumarine   | CHEK1   |
| 4970  | Fumarine   | CHRM4   |
| 4970  | Fumarine   | CYP19A1 |
| 4970  | Fumarine   | DRD1    |
| 4970  | Fumarine   | DRD2    |
| 4970  | Fumarine   | DRD3    |
| 4970  | Fumarine   | DRD4    |
| 4970  | Fumarine   | DRD5    |
| 4970  | Fumarine   | DUSP3   |
| 4970  | Fumarine   | ERN1    |
| 4970  | Fumarine   | F3      |
| 4970  | Fumarine   | FLT3    |
| 4970  | Fumarine   | HTR1A   |
| 4970  | Fumarine   | HTR7    |
| 4970  | Fumarine   | JAK1    |
| 4970  | Fumarine   | JAK2    |
| 4970  | Fumarine   | JAK3    |
| 4970  | Fumarine   | LRRK2   |
| 4970  | Fumarine   | MAPK8   |
| 4970  | Fumarine   | MKMK2   |
| 4970  | Fumarine   | NEK1    |
| 4970  | Fumarine   | PARP2   |
| 4970  | Fumarine   | PDPK1   |
| 4970  | Fumarine   | PIK3CA  |
| 4970  | Fumarine   | PIK3CB  |
| 4970  | Fumarine   | PIK3CD  |
| 4970  | Fumarine   | PIM1    |
| 4970  | Fumarine   | PIM3    |

|         |             |         |
|---------|-------------|---------|
| 4970    | Fumarine    | SIGMAR1 |
| 4970    | Fumarine    | SIRT1   |
| 4970    | Fumarine    | SIRT2   |
| 4970    | Fumarine    | SIRT3   |
| 4970    | Fumarine    | SLC6A3  |
| 4970    | Fumarine    | SYK     |
| 4970    | Fumarine    | TRHR    |
| 4970    | Fumarine    | TTK     |
| 4970    | Fumarine    | TYMS    |
| 5280537 | Moupinamide | ABL1    |
| 5280537 | Moupinamide | ACHE    |
| 5280537 | Moupinamide | ADAM10  |
| 5280537 | Moupinamide | ADAM17  |
| 5280537 | Moupinamide | ADORA1  |
| 5280537 | Moupinamide | ADORA2A |
| 5280537 | Moupinamide | ADORA3  |
| 5280537 | Moupinamide | AGTR1   |
| 5280537 | Moupinamide | AKT2    |
| 5280537 | Moupinamide | ALDH2   |
| 5280537 | Moupinamide | ALK     |
| 5280537 | Moupinamide | ALOX5   |
| 5280537 | Moupinamide | ANPEP   |
| 5280537 | Moupinamide | AVPR1A  |
| 5280537 | Moupinamide | BCHE    |
| 5280537 | Moupinamide | BMP1    |
| 5280537 | Moupinamide | BRAF    |
| 5280537 | Moupinamide | CA12    |
| 5280537 | Moupinamide | CA13    |
| 5280537 | Moupinamide | CA14    |
| 5280537 | Moupinamide | CA5A    |
| 5280537 | Moupinamide | CA5B    |
| 5280537 | Moupinamide | CA6     |
| 5280537 | Moupinamide | CA7     |
| 5280537 | Moupinamide | CA9     |
| 5280537 | Moupinamide | CCNE1   |
| 5280537 | Moupinamide | CCNE1   |
| 5280537 | Moupinamide | CDK1    |
| 5280537 | Moupinamide | CDK1    |
| 5280537 | Moupinamide | CDK4    |
| 5280537 | Moupinamide | CDK5R1  |
| 5280537 | Moupinamide | CFD     |
| 5280537 | Moupinamide | CHEK1   |
| 5280537 | Moupinamide | CHEK2   |
| 5280537 | Moupinamide | CNR2    |

|         |             |          |
|---------|-------------|----------|
| 5280537 | Moupinamide | CTSL     |
| 5280537 | Moupinamide | DNM1     |
| 5280537 | Moupinamide | DRD2     |
| 5280537 | Moupinamide | DRD3     |
| 5280537 | Moupinamide | DUSP3    |
| 5280537 | Moupinamide | EGFR     |
| 5280537 | Moupinamide | EPHA2    |
| 5280537 | Moupinamide | EPHA4    |
| 5280537 | Moupinamide | EPHA5    |
| 5280537 | Moupinamide | EPHA7    |
| 5280537 | Moupinamide | EPHA8    |
| 5280537 | Moupinamide | EPHB2    |
| 5280537 | Moupinamide | EPHB3    |
| 5280537 | Moupinamide | ESRRA    |
| 5280537 | Moupinamide | ESRRB    |
| 5280537 | Moupinamide | GLI2     |
| 5280537 | Moupinamide | GRK2     |
| 5280537 | Moupinamide | HDAC1    |
| 5280537 | Moupinamide | HPGDS    |
| 5280537 | Moupinamide | HSD17B1  |
| 5280537 | Moupinamide | HSD17B2  |
| 5280537 | Moupinamide | HSP90AA1 |
| 5280537 | Moupinamide | HSP90AB1 |
| 5280537 | Moupinamide | HSP90B1  |
| 5280537 | Moupinamide | HTR3A    |
| 5280537 | Moupinamide | INSR     |
| 5280537 | Moupinamide | MAOB     |
| 5280537 | Moupinamide | MAP2K1   |
| 5280537 | Moupinamide | MIF      |
| 5280537 | Moupinamide | MMP1     |
| 5280537 | Moupinamide | MMP12    |
| 5280537 | Moupinamide | MMP13    |
| 5280537 | Moupinamide | MMP14    |
| 5280537 | Moupinamide | MMP16    |
| 5280537 | Moupinamide | MMP2     |
| 5280537 | Moupinamide | MMP3     |
| 5280537 | Moupinamide | MMP7     |
| 5280537 | Moupinamide | MMP8     |
| 5280537 | Moupinamide | MMP9     |
| 5280537 | Moupinamide | MTNR1A   |
| 5280537 | Moupinamide | MTOR     |
| 5280537 | Moupinamide | NR1H4    |
| 5280537 | Moupinamide | PDE4C    |
| 5280537 | Moupinamide | PDE4D    |

|         |                  |         |
|---------|------------------|---------|
| 5280537 | Moupinamide      | PDE7A   |
| 5280537 | Moupinamide      | PDK1    |
| 5280537 | Moupinamide      | PNMT    |
| 5280537 | Moupinamide      | PRKCZ   |
| 5280537 | Moupinamide      | PTGS2   |
| 5280537 | Moupinamide      | PTPN1   |
| 5280537 | Moupinamide      | ROCK2   |
| 5280537 | Moupinamide      | RPS6KB1 |
| 5280537 | Moupinamide      | SLC5A1  |
| 5280537 | Moupinamide      | SYK     |
| 5280537 | Moupinamide      | THRA    |
| 5280537 | Moupinamide      | THRB    |
| 5280537 | Moupinamide      | TNF     |
| 5280537 | Moupinamide      | TOP1    |
| 5280537 | Moupinamide      | TRAP1   |
| 5280537 | Moupinamide      | TRPM8   |
| 5280537 | Moupinamide      | TSPO    |
| 5280537 | Moupinamide      | TYMS    |
| 5280537 | Moupinamide      | TYR     |
| 5280537 | Moupinamide      | VCP     |
| 5280537 | Moupinamide      | WEE1    |
| 5351516 | Peroxyergosterol | AKR1C3  |
| 5351516 | Peroxyergosterol | AVPR1A  |
| 5351516 | Peroxyergosterol | BACE1   |
| 5351516 | Peroxyergosterol | CNR1    |
| 5351516 | Peroxyergosterol | CNR2    |
| 5351516 | Peroxyergosterol | CTSD    |
| 5351516 | Peroxyergosterol | CXCR3   |
| 5351516 | Peroxyergosterol | CYP24A1 |
| 5351516 | Peroxyergosterol | DHCR7   |
| 5351516 | Peroxyergosterol | FAAH    |
| 5351516 | Peroxyergosterol | FASN    |
| 5351516 | Peroxyergosterol | GLRA1   |
| 5351516 | Peroxyergosterol | HPGDS   |
| 5351516 | Peroxyergosterol | HSD11B2 |
| 5351516 | Peroxyergosterol | ITK     |
| 5351516 | Peroxyergosterol | MDM2    |
| 5351516 | Peroxyergosterol | MDM4    |
| 5351516 | Peroxyergosterol | METAP1  |
| 5351516 | Peroxyergosterol | MTNR1A  |
| 5351516 | Peroxyergosterol | MTNR1B  |
| 5351516 | Peroxyergosterol | NOS2    |
| 5351516 | Peroxyergosterol | NR1H2   |
| 5351516 | Peroxyergosterol | PDE4A   |



|         |                  |        |
|---------|------------------|--------|
| 5351516 | Peroxyergosterol | PDE4B  |
| 5351516 | Peroxyergosterol | PDE4C  |
| 5351516 | Peroxyergosterol | PDE4D  |
| 5351516 | Peroxyergosterol | PFKFB3 |
| 5351516 | Peroxyergosterol | S1PR1  |
| 5351516 | Peroxyergosterol | S1PR3  |
| 5351516 | Peroxyergosterol | SHH    |
| 5351516 | Peroxyergosterol | TRPV1  |
| 160487  | (S)-Coclaurine   | ABCB1  |
| 160487  | (S)-Coclaurine   | ACHE   |
| 160487  | (S)-Coclaurine   | ADRA1A |
| 160487  | (S)-Coclaurine   | ADRA1B |
| 160487  | (S)-Coclaurine   | ADRA1D |
| 160487  | (S)-Coclaurine   | ADRA2A |
| 160487  | (S)-Coclaurine   | ADRA2B |
| 160487  | (S)-Coclaurine   | ADRA2C |
| 160487  | (S)-Coclaurine   | ADRB1  |
| 160487  | (S)-Coclaurine   | ADRB2  |
| 160487  | (S)-Coclaurine   | ADRB3  |
| 160487  | (S)-Coclaurine   | AKT1   |
| 160487  | (S)-Coclaurine   | BCHE   |
| 160487  | (S)-Coclaurine   | CA1    |
| 160487  | (S)-Coclaurine   | CA2    |
| 160487  | (S)-Coclaurine   | CA7    |
| 160487  | (S)-Coclaurine   | CA9    |
| 160487  | (S)-Coclaurine   | CHRM4  |
| 160487  | (S)-Coclaurine   | CHRNA3 |
| 160487  | (S)-Coclaurine   | CHRNA4 |
| 160487  | (S)-Coclaurine   | CHRN4  |
| 160487  | (S)-Coclaurine   | DHCR7  |
| 160487  | (S)-Coclaurine   | DPP4   |
| 160487  | (S)-Coclaurine   | DRD1   |
| 160487  | (S)-Coclaurine   | DRD2   |
| 160487  | (S)-Coclaurine   | DRD3   |
| 160487  | (S)-Coclaurine   | DRD4   |
| 160487  | (S)-Coclaurine   | DRD5   |
| 160487  | (S)-Coclaurine   | ESR1   |
| 160487  | (S)-Coclaurine   | ESR2   |
| 160487  | (S)-Coclaurine   | F3     |
| 160487  | (S)-Coclaurine   | GRIK2  |
| 160487  | (S)-Coclaurine   | HCRTR1 |
| 160487  | (S)-Coclaurine   | HCRTR2 |
| 160487  | (S)-Coclaurine   | HDAC1  |
| 160487  | (S)-Coclaurine   | HTR1A  |

|        |                |         |
|--------|----------------|---------|
| 160487 | (S)-Coclaurine | HTR2A   |
| 160487 | (S)-Coclaurine | HTR2C   |
| 160487 | (S)-Coclaurine | HTR7    |
| 160487 | (S)-Coclaurine | JAK1    |
| 160487 | (S)-Coclaurine | JAK2    |
| 160487 | (S)-Coclaurine | JAK3    |
| 160487 | (S)-Coclaurine | JUN     |
| 160487 | (S)-Coclaurine | KCNH2   |
| 160487 | (S)-Coclaurine | KCNN1   |
| 160487 | (S)-Coclaurine | KCNN2   |
| 160487 | (S)-Coclaurine | KCNN3   |
| 160487 | (S)-Coclaurine | KDM1A   |
| 160487 | (S)-Coclaurine | MAOA    |
| 160487 | (S)-Coclaurine | MTNR1B  |
| 160487 | (S)-Coclaurine | OPRD1   |
| 160487 | (S)-Coclaurine | OPRK1   |
| 160487 | (S)-Coclaurine | OPRM1   |
| 160487 | (S)-Coclaurine | PARP1   |
| 160487 | (S)-Coclaurine | PTPRCAP |
| 160487 | (S)-Coclaurine | RBBP9   |
| 160487 | (S)-Coclaurine | ROCK2   |
| 160487 | (S)-Coclaurine | SIGMAR1 |
| 160487 | (S)-Coclaurine | SLC18A2 |
| 160487 | (S)-Coclaurine | SLC47A1 |
| 160487 | (S)-Coclaurine | SLC6A2  |
| 160487 | (S)-Coclaurine | SLC6A3  |
| 160487 | (S)-Coclaurine | SLC6A4  |
| 160487 | (S)-Coclaurine | TBXA2R  |
| 160487 | (S)-Coclaurine | TYK2    |
| 122691 | Lysicamine     | ABCG2   |
| 122691 | Lysicamine     | ACE     |
| 122691 | Lysicamine     | ACVR1B  |
| 122691 | Lysicamine     | ADORA2A |
| 122691 | Lysicamine     | ADORA2B |
| 122691 | Lysicamine     | AKR1C3  |
| 122691 | Lysicamine     | AKT1    |
| 122691 | Lysicamine     | ALDH1A1 |
| 122691 | Lysicamine     | ALPL    |
| 122691 | Lysicamine     | BDKRB2  |
| 122691 | Lysicamine     | BMP4    |
| 122691 | Lysicamine     | BTK     |
| 122691 | Lysicamine     | CA12    |
| 122691 | Lysicamine     | CA7     |
| 122691 | Lysicamine     | CA9     |

|        |            |         |
|--------|------------|---------|
| 122691 | Lysicamine | CACNA1B |
| 122691 | Lysicamine | CAPN1   |
| 122691 | Lysicamine | CCNB3   |
| 122691 | Lysicamine | CCNC    |
| 122691 | Lysicamine | CCND3   |
| 122691 | Lysicamine | CCR5    |
| 122691 | Lysicamine | CCR8    |
| 122691 | Lysicamine | CDC7    |
| 122691 | Lysicamine | CDK1    |
| 122691 | Lysicamine | CDK2    |
| 122691 | Lysicamine | CDK7    |
| 122691 | Lysicamine | CES1    |
| 122691 | Lysicamine | CES2    |
| 122691 | Lysicamine | CHRM1   |
| 122691 | Lysicamine | CHRM2   |
| 122691 | Lysicamine | CSNK1D  |
| 122691 | Lysicamine | CTSK    |
| 122691 | Lysicamine | CTSS    |
| 122691 | Lysicamine | CYP17A1 |
| 122691 | Lysicamine | CYP19A1 |
| 122691 | Lysicamine | DUSP3   |
| 122691 | Lysicamine | EGFR    |
| 122691 | Lysicamine | ELANE   |
| 122691 | Lysicamine | EPHX2   |
| 122691 | Lysicamine | ERBB2   |
| 122691 | Lysicamine | FAP     |
| 122691 | Lysicamine | GABRA5  |
| 122691 | Lysicamine | GABRB3  |
| 122691 | Lysicamine | GAPDH   |
| 122691 | Lysicamine | GPR139  |
| 122691 | Lysicamine | GRM4    |
| 122691 | Lysicamine | GSK3A   |
| 122691 | Lysicamine | GSK3B   |
| 122691 | Lysicamine | GSR     |
| 122691 | Lysicamine | GUSB    |
| 122691 | Lysicamine | HCRTR1  |
| 122691 | Lysicamine | HCRTR2  |
| 122691 | Lysicamine | HDAC3   |
| 122691 | Lysicamine | HDAC6   |
| 122691 | Lysicamine | HRH1    |
| 122691 | Lysicamine | HRH4    |
| 122691 | Lysicamine | HSD11B1 |
| 122691 | Lysicamine | HTR4    |
| 122691 | Lysicamine | ICAM1   |

|        |             |          |
|--------|-------------|----------|
| 122691 | Lysicamine  | LCK      |
| 122691 | Lysicamine  | MAP2K1   |
| 122691 | Lysicamine  | MAPK10   |
| 122691 | Lysicamine  | MAPK8    |
| 122691 | Lysicamine  | MAPK9    |
| 122691 | Lysicamine  | MET      |
| 122691 | Lysicamine  | MMP1     |
| 122691 | Lysicamine  | MMP13    |
| 122691 | Lysicamine  | MMP8     |
| 122691 | Lysicamine  | NAMPT    |
| 122691 | Lysicamine  | NOTUM    |
| 122691 | Lysicamine  | NQO2     |
| 122691 | Lysicamine  | P2RX7    |
| 122691 | Lysicamine  | PABPC1   |
| 122691 | Lysicamine  | PARP2    |
| 122691 | Lysicamine  | PDE7A    |
| 122691 | Lysicamine  | PGGT1B   |
| 122691 | Lysicamine  | PIK3CA   |
| 122691 | Lysicamine  | PREP     |
| 122691 | Lysicamine  | PRKDC    |
| 122691 | Lysicamine  | PTGER2   |
| 122691 | Lysicamine  | PTGER4   |
| 122691 | Lysicamine  | PTP4A3   |
| 122691 | Lysicamine  | RPS6KA5  |
| 122691 | Lysicamine  | SELE     |
| 122691 | Lysicamine  | SHH      |
| 122691 | Lysicamine  | SIGMAR1  |
| 122691 | Lysicamine  | SIRT2    |
| 122691 | Lysicamine  | SLC22A12 |
| 122691 | Lysicamine  | SRC      |
| 122691 | Lysicamine  | STAT3    |
| 122691 | Lysicamine  | TAAR1    |
| 122691 | Lysicamine  | TGFBR1   |
| 122691 | Lysicamine  | TGM2     |
| 122691 | Lysicamine  | TLR9     |
| 122691 | Lysicamine  | TNFRSF1A |
| 122691 | Lysicamine  | TNKS     |
| 122691 | Lysicamine  | TNKS2    |
| 122691 | Lysicamine  | TRPA1    |
| 122691 | Lysicamine  | TRPV1    |
| 122691 | Lysicamine  | UTS2R    |
| 73299  | hederagenin | ACP1     |
| 73299  | hederagenin | AKR1B10  |
| 73299  | hederagenin | ALOX5    |

|       |             |         |
|-------|-------------|---------|
| 73299 | hederagenin | ALOX5AP |
| 73299 | hederagenin | AR      |
| 73299 | hederagenin | BACE1   |
| 73299 | hederagenin | BCHE    |
| 73299 | hederagenin | CD81    |
| 73299 | hederagenin | CDC25A  |
| 73299 | hederagenin | CDC25B  |
| 73299 | hederagenin | CES2    |
| 73299 | hederagenin | CHRM2   |
| 73299 | hederagenin | CYP17A1 |
| 73299 | hederagenin | CYP19A1 |
| 73299 | hederagenin | CYP51A1 |
| 73299 | hederagenin | ESR1    |
| 73299 | hederagenin | ESR2    |
| 73299 | hederagenin | FAAH    |
| 73299 | hederagenin | FABP1   |
| 73299 | hederagenin | FABP3   |
| 73299 | hederagenin | FABP4   |
| 73299 | hederagenin | FABP5   |
| 73299 | hederagenin | FFAR1   |
| 73299 | hederagenin | FNTA    |
| 73299 | hederagenin | G6PD    |
| 73299 | hederagenin | GLUL    |
| 73299 | hederagenin | GPBAR1  |
| 73299 | hederagenin | GRIK1   |
| 73299 | hederagenin | GRIK2   |
| 73299 | hederagenin | HMGR    |
| 73299 | hederagenin | HSD11B1 |
| 73299 | hederagenin | HSD11B2 |
| 73299 | hederagenin | IL6     |
| 73299 | hederagenin | LTB4R   |
| 73299 | hederagenin | NOS2    |
| 73299 | hederagenin | NR1H3   |
| 73299 | hederagenin | NR1H4   |
| 73299 | hederagenin | NR3C1   |
| 73299 | hederagenin | NR3C2   |
| 73299 | hederagenin | PDE4D   |
| 73299 | hederagenin | PGR     |
| 73299 | hederagenin | PLA2G1B |
| 73299 | hederagenin | POLB    |
| 73299 | hederagenin | PPARA   |
| 73299 | hederagenin | PPARD   |
| 73299 | hederagenin | PPARG   |
| 73299 | hederagenin | PREP    |

|          |              |          |
|----------|--------------|----------|
| 73299    | hederagenin  | PRKCH    |
| 73299    | hederagenin  | PTGDR    |
| 73299    | hederagenin  | PTGDR2   |
| 73299    | hederagenin  | PTGER1   |
| 73299    | hederagenin  | PTGER2   |
| 73299    | hederagenin  | PTGER4   |
| 73299    | hederagenin  | PTGES    |
| 73299    | hederagenin  | PTGIR    |
| 73299    | hederagenin  | PTGS1    |
| 73299    | hederagenin  | PTGS2    |
| 73299    | hederagenin  | PTPN1    |
| 73299    | hederagenin  | PTPN11   |
| 73299    | hederagenin  | PTPN2    |
| 73299    | hederagenin  | PTPN6    |
| 73299    | hederagenin  | PTPRF    |
| 73299    | hederagenin  | RORA     |
| 73299    | hederagenin  | RORC     |
| 73299    | hederagenin  | SCD      |
| 73299    | hederagenin  | SERPINA6 |
| 73299    | hederagenin  | SHBG     |
| 73299    | hederagenin  | SIGMAR1  |
| 73299    | hederagenin  | SLC10A1  |
| 73299    | hederagenin  | SLC10A2  |
| 73299    | hederagenin  | SRD5A2   |
| 73299    | hederagenin  | TERT     |
| 73299    | hederagenin  | TLR9     |
| 73299    | hederagenin  | TOP1     |
| 73299    | hederagenin  | TOP2A    |
| 10181133 | Cerevisterol | CYP2D6   |
| 10181133 | Cerevisterol | ACHE     |
| 10181133 | Cerevisterol | ADORA1   |
| 10181133 | Cerevisterol | ADORA2A  |
| 10181133 | Cerevisterol | AKR1C3   |
| 10181133 | Cerevisterol | ALK      |
| 10181133 | Cerevisterol | AR       |
| 10181133 | Cerevisterol | AVPR1A   |
| 10181133 | Cerevisterol | BCHE     |
| 10181133 | Cerevisterol | CA4      |
| 10181133 | Cerevisterol | CA7      |
| 10181133 | Cerevisterol | CALCRL   |
| 10181133 | Cerevisterol | CCND1    |
| 10181133 | Cerevisterol | CCNE2    |
| 10181133 | Cerevisterol | CCNT1    |
| 10181133 | Cerevisterol | CCR1     |

|          |              |         |
|----------|--------------|---------|
| 10181133 | Cerevisterol | CDK2    |
| 10181133 | Cerevisterol | CDK4    |
| 10181133 | Cerevisterol | CDK6    |
| 10181133 | Cerevisterol | CDK9    |
| 10181133 | Cerevisterol | CHRM2   |
| 10181133 | Cerevisterol | CHUK    |
| 10181133 | Cerevisterol | CNR2    |
| 10181133 | Cerevisterol | CSF1R   |
| 10181133 | Cerevisterol | CTSL    |
| 10181133 | Cerevisterol | CYP17A1 |
| 10181133 | Cerevisterol | CYP19A1 |
| 10181133 | Cerevisterol | CYP2C19 |
| 10181133 | Cerevisterol | CYP2C9  |
| 10181133 | Cerevisterol | CYP3A4  |
| 10181133 | Cerevisterol | CYP51A1 |
| 10181133 | Cerevisterol | DGAT1   |
| 10181133 | Cerevisterol | EGFR    |
| 10181133 | Cerevisterol | ESR1    |
| 10181133 | Cerevisterol | ESR2    |
| 10181133 | Cerevisterol | FGFR2   |
| 10181133 | Cerevisterol | GPR18   |
| 10181133 | Cerevisterol | GPR55   |
| 10181133 | Cerevisterol | GRM2    |
| 10181133 | Cerevisterol | GSK3B   |
| 10181133 | Cerevisterol | HCRTR1  |
| 10181133 | Cerevisterol | HCRTR2  |
| 10181133 | Cerevisterol | HMGCR   |
| 10181133 | Cerevisterol | HSD11B1 |
| 10181133 | Cerevisterol | IKBKB   |
| 10181133 | Cerevisterol | IL6ST   |
| 10181133 | Cerevisterol | KDR     |
| 10181133 | Cerevisterol | KIT     |
| 10181133 | Cerevisterol | MAPK14  |
| 10181133 | Cerevisterol | MAPK8   |
| 10181133 | Cerevisterol | MAST3   |
| 10181133 | Cerevisterol | MDM2    |
| 10181133 | Cerevisterol | MDM4    |
| 10181133 | Cerevisterol | MET     |
| 10181133 | Cerevisterol | METAP1  |
| 10181133 | Cerevisterol | MGLL    |
| 10181133 | Cerevisterol | MTNR1A  |
| 10181133 | Cerevisterol | MTNR1B  |
| 10181133 | Cerevisterol | MTOR    |
| 10181133 | Cerevisterol | NPC1L1  |

|          |                                                                                          |          |
|----------|------------------------------------------------------------------------------------------|----------|
| 10181133 | Cerevisterol                                                                             | NR1H2    |
| 10181133 | Cerevisterol                                                                             | NR1H3    |
| 10181133 | Cerevisterol                                                                             | NR1I2    |
| 10181133 | Cerevisterol                                                                             | NTRK1    |
| 10181133 | Cerevisterol                                                                             | OPRD1    |
| 10181133 | Cerevisterol                                                                             | OPRK1    |
| 10181133 | Cerevisterol                                                                             | OPRL1    |
| 10181133 | Cerevisterol                                                                             | OPRM1    |
| 10181133 | Cerevisterol                                                                             | PDE2A    |
| 10181133 | Cerevisterol                                                                             | PDE3A    |
| 10181133 | Cerevisterol                                                                             | PDE3B    |
| 10181133 | Cerevisterol                                                                             | PDE4B    |
| 10181133 | Cerevisterol                                                                             | PDGFRB   |
| 10181133 | Cerevisterol                                                                             | PFKFB3   |
| 10181133 | Cerevisterol                                                                             | PIM1     |
| 10181133 | Cerevisterol                                                                             | PIM3     |
| 10181133 | Cerevisterol                                                                             | PRKCA    |
| 10181133 | Cerevisterol                                                                             | PRKCB    |
| 10181133 | Cerevisterol                                                                             | PRKCE    |
| 10181133 | Cerevisterol                                                                             | PSEN2    |
| 10181133 | Cerevisterol                                                                             | PTGDR    |
| 10181133 | Cerevisterol                                                                             | PTGER1   |
| 10181133 | Cerevisterol                                                                             | PTGER3   |
| 10181133 | Cerevisterol                                                                             | PTGFR    |
| 10181133 | Cerevisterol                                                                             | PTPN1    |
| 10181133 | Cerevisterol                                                                             | PYGL     |
| 10181133 | Cerevisterol                                                                             | RORA     |
| 10181133 | Cerevisterol                                                                             | RORC     |
| 10181133 | Cerevisterol                                                                             | S1PR1    |
| 10181133 | Cerevisterol                                                                             | S1PR3    |
| 10181133 | Cerevisterol                                                                             | SERPINA6 |
| 10181133 | Cerevisterol                                                                             | SHBG     |
| 10181133 | Cerevisterol                                                                             | SLC6A2   |
| 10181133 | Cerevisterol                                                                             | SLC6A4   |
| 10181133 | Cerevisterol                                                                             | SMO      |
| 10181133 | Cerevisterol                                                                             | SRC      |
| 10181133 | Cerevisterol                                                                             | SREBF2   |
| 10181133 | Cerevisterol                                                                             | TNF      |
| 10181133 | Cerevisterol                                                                             | TRPV1    |
| 10181133 | Cerevisterol                                                                             | VDR      |
| 10743008 | (2R)-2-<br>[(3S,5R,10S,13R,14R,16R,17R)-<br>3,16-dihydroxy-4,4,10,13,14-<br>pentamethyl- | ACP1     |



|          |                                                                                            |         |
|----------|--------------------------------------------------------------------------------------------|---------|
| 10743008 | 2,3,5,6,12,15,16,17-octahydro-1H-cyclopenta[a]phenanthren-17-yl]-6-methylhept-5-enoic acid | AGTR1   |
|          | (2R)-2-[(3S,5R,10S,13R,14R,16R,17R)-3,16-dihydroxy-4,4,10,13,14-pentamethyl-               |         |
|          | 2,3,5,6,12,15,16,17-octahydro-1H-cyclopenta[a]phenanthren-17-yl]-6-methylhept-5-enoic acid |         |
| 10743008 | (2R)-2-[(3S,5R,10S,13R,14R,16R,17R)-3,16-dihydroxy-4,4,10,13,14-pentamethyl-               | AKR1B10 |
|          | 2,3,5,6,12,15,16,17-octahydro-1H-cyclopenta[a]phenanthren-17-yl]-6-methylhept-5-enoic acid |         |
| 10743008 | (2R)-2-[(3S,5R,10S,13R,14R,16R,17R)-3,16-dihydroxy-4,4,10,13,14-pentamethyl-               | ALOX12  |
|          | 2,3,5,6,12,15,16,17-octahydro-1H-cyclopenta[a]phenanthren-17-yl]-6-methylhept-5-enoic acid |         |
| 10743008 | (2R)-2-[(3S,5R,10S,13R,14R,16R,17R)-3,16-dihydroxy-4,4,10,13,14-pentamethyl-               | ALOX5AP |
|          | 2,3,5,6,12,15,16,17-octahydro-1H-cyclopenta[a]phenanthren-17-yl]-6-methylhept-5-enoic acid |         |
| 10743008 | (2R)-2-[(3S,5R,10S,13R,14R,16R,17R)-3,16-dihydroxy-4,4,10,13,14-pentamethyl-               | AR      |
|          | 2,3,5,6,12,15,16,17-octahydro-1H-cyclopenta[a]phenanthren-17-yl]-6-methylhept-5-enoic acid |         |

|          |                                                                                                                                                                                                   |        |
|----------|---------------------------------------------------------------------------------------------------------------------------------------------------------------------------------------------------|--------|
| 10743008 | (2R)-2-<br>[(3S,5R,10S,13R,14R,16R,17R)-<br>3,16-dihydroxy-4,4,10,13,14-<br>pentamethyl-<br>2,3,5,6,12,15,16,17-octahydro-<br>1H-cyclopenta[a]phenanthren-<br>17-yl]-6-methylhept-5-enoic<br>acid | BACE1  |
| 10743008 | (2R)-2-<br>[(3S,5R,10S,13R,14R,16R,17R)-<br>3,16-dihydroxy-4,4,10,13,14-<br>pentamethyl-<br>2,3,5,6,12,15,16,17-octahydro-<br>1H-cyclopenta[a]phenanthren-<br>17-yl]-6-methylhept-5-enoic<br>acid | BCHE   |
| 10743008 | (2R)-2-<br>[(3S,5R,10S,13R,14R,16R,17R)-<br>3,16-dihydroxy-4,4,10,13,14-<br>pentamethyl-<br>2,3,5,6,12,15,16,17-octahydro-<br>1H-cyclopenta[a]phenanthren-<br>17-yl]-6-methylhept-5-enoic<br>acid | CD81   |
| 10743008 | (2R)-2-<br>[(3S,5R,10S,13R,14R,16R,17R)-<br>3,16-dihydroxy-4,4,10,13,14-<br>pentamethyl-<br>2,3,5,6,12,15,16,17-octahydro-<br>1H-cyclopenta[a]phenanthren-<br>17-yl]-6-methylhept-5-enoic<br>acid | CDC25B |
| 10743008 | (2R)-2-<br>[(3S,5R,10S,13R,14R,16R,17R)-<br>3,16-dihydroxy-4,4,10,13,14-<br>pentamethyl-<br>2,3,5,6,12,15,16,17-octahydro-<br>1H-cyclopenta[a]phenanthren-<br>17-yl]-6-methylhept-5-enoic<br>acid | CES2   |
| 10743008 | (2R)-2-<br>[(3S,5R,10S,13R,14R,16R,17R)-<br>3,16-dihydroxy-4,4,10,13,14-<br>pentamethyl-                                                                                                          | CTSA   |

|          |                                                                                                                                                                                                                                                                          |         |
|----------|--------------------------------------------------------------------------------------------------------------------------------------------------------------------------------------------------------------------------------------------------------------------------|---------|
| 10743008 | 2,3,5,6,12,15,16,17-octahydro-1H-cyclopenta[a]phenanthren-17-yl]-6-methylhept-5-enoic acid<br>(2R)-2-<br>[(3S,5R,10S,13R,14R,16R,17R)-3,16-dihydroxy-4,4,10,13,14-pentamethyl-2,3,5,6,12,15,16,17-octahydro-1H-cyclopenta[a]phenanthren-17-yl]-6-methylhept-5-enoic acid | CYP17A1 |
| 10743008 | (2R)-2-<br>[(3S,5R,10S,13R,14R,16R,17R)-3,16-dihydroxy-4,4,10,13,14-pentamethyl-2,3,5,6,12,15,16,17-octahydro-1H-cyclopenta[a]phenanthren-17-yl]-6-methylhept-5-enoic acid                                                                                               | CYP19A1 |
| 10743008 | (2R)-2-<br>[(3S,5R,10S,13R,14R,16R,17R)-3,16-dihydroxy-4,4,10,13,14-pentamethyl-2,3,5,6,12,15,16,17-octahydro-1H-cyclopenta[a]phenanthren-17-yl]-6-methylhept-5-enoic acid                                                                                               | CYP51A1 |
| 10743008 | (2R)-2-<br>[(3S,5R,10S,13R,14R,16R,17R)-3,16-dihydroxy-4,4,10,13,14-pentamethyl-2,3,5,6,12,15,16,17-octahydro-1H-cyclopenta[a]phenanthren-17-yl]-6-methylhept-5-enoic acid                                                                                               | CYSLTR1 |
| 10743008 | (2R)-2-<br>[(3S,5R,10S,13R,14R,16R,17R)-3,16-dihydroxy-4,4,10,13,14-pentamethyl-2,3,5,6,12,15,16,17-octahydro-1H-cyclopenta[a]phenanthren-17-yl]-6-methylhept-5-enoic acid                                                                                               | EDNRA   |

|          |                                                                                                                                                                                                   |       |
|----------|---------------------------------------------------------------------------------------------------------------------------------------------------------------------------------------------------|-------|
| 10743008 | (2R)-2-<br>[(3S,5R,10S,13R,14R,16R,17R)-<br>3,16-dihydroxy-4,4,10,13,14-<br>pentamethyl-<br>2,3,5,6,12,15,16,17-octahydro-<br>1H-cyclopenta[a]phenanthren-<br>17-yl]-6-methylhept-5-enoic<br>acid | ESR1  |
| 10743008 | (2R)-2-<br>[(3S,5R,10S,13R,14R,16R,17R)-<br>3,16-dihydroxy-4,4,10,13,14-<br>pentamethyl-<br>2,3,5,6,12,15,16,17-octahydro-<br>1H-cyclopenta[a]phenanthren-<br>17-yl]-6-methylhept-5-enoic<br>acid | ESR2  |
| 10743008 | (2R)-2-<br>[(3S,5R,10S,13R,14R,16R,17R)-<br>3,16-dihydroxy-4,4,10,13,14-<br>pentamethyl-<br>2,3,5,6,12,15,16,17-octahydro-<br>1H-cyclopenta[a]phenanthren-<br>17-yl]-6-methylhept-5-enoic<br>acid | FABP1 |
| 10743008 | (2R)-2-<br>[(3S,5R,10S,13R,14R,16R,17R)-<br>3,16-dihydroxy-4,4,10,13,14-<br>pentamethyl-<br>2,3,5,6,12,15,16,17-octahydro-<br>1H-cyclopenta[a]phenanthren-<br>17-yl]-6-methylhept-5-enoic<br>acid | FNTA  |
| 10743008 | (2R)-2-<br>[(3S,5R,10S,13R,14R,16R,17R)-<br>3,16-dihydroxy-4,4,10,13,14-<br>pentamethyl-<br>2,3,5,6,12,15,16,17-octahydro-<br>1H-cyclopenta[a]phenanthren-<br>17-yl]-6-methylhept-5-enoic<br>acid | G6PD  |
| 10743008 | (2R)-2-<br>[(3S,5R,10S,13R,14R,16R,17R)-<br>3,16-dihydroxy-4,4,10,13,14-<br>pentamethyl-                                                                                                          | HAO1  |

|          |                                                                                            |         |
|----------|--------------------------------------------------------------------------------------------|---------|
| 10743008 | 2,3,5,6,12,15,16,17-octahydro-1H-cyclopenta[a]phenanthren-17-yl]-6-methylhept-5-enoic acid | HMGR    |
|          | (2R)-2-[(3S,5R,10S,13R,14R,16R,17R)-3,16-dihydroxy-4,4,10,13,14-pentamethyl-               |         |
|          | 2,3,5,6,12,15,16,17-octahydro-1H-cyclopenta[a]phenanthren-17-yl]-6-methylhept-5-enoic acid |         |
| 10743008 | (2R)-2-[(3S,5R,10S,13R,14R,16R,17R)-3,16-dihydroxy-4,4,10,13,14-pentamethyl-               | HSD11B1 |
|          | 2,3,5,6,12,15,16,17-octahydro-1H-cyclopenta[a]phenanthren-17-yl]-6-methylhept-5-enoic acid |         |
| 10743008 | (2R)-2-[(3S,5R,10S,13R,14R,16R,17R)-3,16-dihydroxy-4,4,10,13,14-pentamethyl-               | HSD11B2 |
|          | 2,3,5,6,12,15,16,17-octahydro-1H-cyclopenta[a]phenanthren-17-yl]-6-methylhept-5-enoic acid |         |
| 10743008 | (2R)-2-[(3S,5R,10S,13R,14R,16R,17R)-3,16-dihydroxy-4,4,10,13,14-pentamethyl-               | ITGAV   |
|          | 2,3,5,6,12,15,16,17-octahydro-1H-cyclopenta[a]phenanthren-17-yl]-6-methylhept-5-enoic acid |         |
| 10743008 | (2R)-2-[(3S,5R,10S,13R,14R,16R,17R)-3,16-dihydroxy-4,4,10,13,14-pentamethyl-               | MDM2    |
|          | 2,3,5,6,12,15,16,17-octahydro-1H-cyclopenta[a]phenanthren-17-yl]-6-methylhept-5-enoic acid |         |

|          |                                                                                                                                                                                                   |       |
|----------|---------------------------------------------------------------------------------------------------------------------------------------------------------------------------------------------------|-------|
| 10743008 | (2R)-2-<br>[(3S,5R,10S,13R,14R,16R,17R)-<br>3,16-dihydroxy-4,4,10,13,14-<br>pentamethyl-<br>2,3,5,6,12,15,16,17-octahydro-<br>1H-cyclopenta[a]phenanthren-<br>17-yl]-6-methylhept-5-enoic<br>acid | MMP1  |
| 10743008 | (2R)-2-<br>[(3S,5R,10S,13R,14R,16R,17R)-<br>3,16-dihydroxy-4,4,10,13,14-<br>pentamethyl-<br>2,3,5,6,12,15,16,17-octahydro-<br>1H-cyclopenta[a]phenanthren-<br>17-yl]-6-methylhept-5-enoic<br>acid | MMP10 |
| 10743008 | (2R)-2-<br>[(3S,5R,10S,13R,14R,16R,17R)-<br>3,16-dihydroxy-4,4,10,13,14-<br>pentamethyl-<br>2,3,5,6,12,15,16,17-octahydro-<br>1H-cyclopenta[a]phenanthren-<br>17-yl]-6-methylhept-5-enoic<br>acid | MMP12 |
| 10743008 | (2R)-2-<br>[(3S,5R,10S,13R,14R,16R,17R)-<br>3,16-dihydroxy-4,4,10,13,14-<br>pentamethyl-<br>2,3,5,6,12,15,16,17-octahydro-<br>1H-cyclopenta[a]phenanthren-<br>17-yl]-6-methylhept-5-enoic<br>acid | MMP13 |
| 10743008 | (2R)-2-<br>[(3S,5R,10S,13R,14R,16R,17R)-<br>3,16-dihydroxy-4,4,10,13,14-<br>pentamethyl-<br>2,3,5,6,12,15,16,17-octahydro-<br>1H-cyclopenta[a]phenanthren-<br>17-yl]-6-methylhept-5-enoic<br>acid | MMP2  |
| 10743008 | (2R)-2-<br>[(3S,5R,10S,13R,14R,16R,17R)-<br>3,16-dihydroxy-4,4,10,13,14-<br>pentamethyl-                                                                                                          | MMP3  |

|          |                                                                                            |        |
|----------|--------------------------------------------------------------------------------------------|--------|
| 10743008 | 2,3,5,6,12,15,16,17-octahydro-1H-cyclopenta[a]phenanthren-17-yl]-6-methylhept-5-enoic acid | MMP8   |
|          | (2R)-2-[(3S,5R,10S,13R,14R,16R,17R)-3,16-dihydroxy-4,4,10,13,14-pentamethyl-               |        |
|          | 2,3,5,6,12,15,16,17-octahydro-1H-cyclopenta[a]phenanthren-17-yl]-6-methylhept-5-enoic acid |        |
| 10743008 | (2R)-2-[(3S,5R,10S,13R,14R,16R,17R)-3,16-dihydroxy-4,4,10,13,14-pentamethyl-               | MMP9   |
|          | 2,3,5,6,12,15,16,17-octahydro-1H-cyclopenta[a]phenanthren-17-yl]-6-methylhept-5-enoic acid |        |
| 10743008 | (2R)-2-[(3S,5R,10S,13R,14R,16R,17R)-3,16-dihydroxy-4,4,10,13,14-pentamethyl-               | NOS2   |
|          | 2,3,5,6,12,15,16,17-octahydro-1H-cyclopenta[a]phenanthren-17-yl]-6-methylhept-5-enoic acid |        |
| 10743008 | (2R)-2-[(3S,5R,10S,13R,14R,16R,17R)-3,16-dihydroxy-4,4,10,13,14-pentamethyl-               | NPC1L1 |
|          | 2,3,5,6,12,15,16,17-octahydro-1H-cyclopenta[a]phenanthren-17-yl]-6-methylhept-5-enoic acid |        |
| 10743008 | (2R)-2-[(3S,5R,10S,13R,14R,16R,17R)-3,16-dihydroxy-4,4,10,13,14-pentamethyl-               | NR1H3  |
|          | 2,3,5,6,12,15,16,17-octahydro-1H-cyclopenta[a]phenanthren-17-yl]-6-methylhept-5-enoic acid |        |

|          |                                                                                                                                                                                                   |         |
|----------|---------------------------------------------------------------------------------------------------------------------------------------------------------------------------------------------------|---------|
| 10743008 | (2R)-2-<br>[(3S,5R,10S,13R,14R,16R,17R)-<br>3,16-dihydroxy-4,4,10,13,14-<br>pentamethyl-<br>2,3,5,6,12,15,16,17-octahydro-<br>1H-cyclopenta[a]phenanthren-<br>17-yl]-6-methylhept-5-enoic<br>acid | NR3C1   |
| 10743008 | (2R)-2-<br>[(3S,5R,10S,13R,14R,16R,17R)-<br>3,16-dihydroxy-4,4,10,13,14-<br>pentamethyl-<br>2,3,5,6,12,15,16,17-octahydro-<br>1H-cyclopenta[a]phenanthren-<br>17-yl]-6-methylhept-5-enoic<br>acid | OPRD1   |
| 10743008 | (2R)-2-<br>[(3S,5R,10S,13R,14R,16R,17R)-<br>3,16-dihydroxy-4,4,10,13,14-<br>pentamethyl-<br>2,3,5,6,12,15,16,17-octahydro-<br>1H-cyclopenta[a]phenanthren-<br>17-yl]-6-methylhept-5-enoic<br>acid | OPRK1   |
| 10743008 | (2R)-2-<br>[(3S,5R,10S,13R,14R,16R,17R)-<br>3,16-dihydroxy-4,4,10,13,14-<br>pentamethyl-<br>2,3,5,6,12,15,16,17-octahydro-<br>1H-cyclopenta[a]phenanthren-<br>17-yl]-6-methylhept-5-enoic<br>acid | PDE4D   |
| 10743008 | (2R)-2-<br>[(3S,5R,10S,13R,14R,16R,17R)-<br>3,16-dihydroxy-4,4,10,13,14-<br>pentamethyl-<br>2,3,5,6,12,15,16,17-octahydro-<br>1H-cyclopenta[a]phenanthren-<br>17-yl]-6-methylhept-5-enoic<br>acid | PGR     |
| 10743008 | (2R)-2-<br>[(3S,5R,10S,13R,14R,16R,17R)-<br>3,16-dihydroxy-4,4,10,13,14-<br>pentamethyl-                                                                                                          | PLA2G1B |



|          |                                                                                            |       |
|----------|--------------------------------------------------------------------------------------------|-------|
| 10743008 | 2,3,5,6,12,15,16,17-octahydro-1H-cyclopenta[a]phenanthren-17-yl]-6-methylhept-5-enoic acid | POLB  |
|          | (2R)-2-[(3S,5R,10S,13R,14R,16R,17R)-3,16-dihydroxy-4,4,10,13,14-pentamethyl-               |       |
|          | 2,3,5,6,12,15,16,17-octahydro-1H-cyclopenta[a]phenanthren-17-yl]-6-methylhept-5-enoic acid |       |
| 10743008 | (2R)-2-[(3S,5R,10S,13R,14R,16R,17R)-3,16-dihydroxy-4,4,10,13,14-pentamethyl-               | PPARA |
|          | 2,3,5,6,12,15,16,17-octahydro-1H-cyclopenta[a]phenanthren-17-yl]-6-methylhept-5-enoic acid |       |
| 10743008 | (2R)-2-[(3S,5R,10S,13R,14R,16R,17R)-3,16-dihydroxy-4,4,10,13,14-pentamethyl-               | PPARD |
|          | 2,3,5,6,12,15,16,17-octahydro-1H-cyclopenta[a]phenanthren-17-yl]-6-methylhept-5-enoic acid |       |
| 10743008 | (2R)-2-[(3S,5R,10S,13R,14R,16R,17R)-3,16-dihydroxy-4,4,10,13,14-pentamethyl-               | PPARG |
|          | 2,3,5,6,12,15,16,17-octahydro-1H-cyclopenta[a]phenanthren-17-yl]-6-methylhept-5-enoic acid |       |
| 10743008 | (2R)-2-[(3S,5R,10S,13R,14R,16R,17R)-3,16-dihydroxy-4,4,10,13,14-pentamethyl-               | PREP  |
|          | 2,3,5,6,12,15,16,17-octahydro-1H-cyclopenta[a]phenanthren-17-yl]-6-methylhept-5-enoic acid |       |

|          |                                                                                                                                                                                                   |        |
|----------|---------------------------------------------------------------------------------------------------------------------------------------------------------------------------------------------------|--------|
| 10743008 | (2R)-2-<br>[(3S,5R,10S,13R,14R,16R,17R)-<br>3,16-dihydroxy-4,4,10,13,14-<br>pentamethyl-<br>2,3,5,6,12,15,16,17-octahydro-<br>1H-cyclopenta[a]phenanthren-<br>17-yl]-6-methylhept-5-enoic<br>acid | PRKCH  |
| 10743008 | (2R)-2-<br>[(3S,5R,10S,13R,14R,16R,17R)-<br>3,16-dihydroxy-4,4,10,13,14-<br>pentamethyl-<br>2,3,5,6,12,15,16,17-octahydro-<br>1H-cyclopenta[a]phenanthren-<br>17-yl]-6-methylhept-5-enoic<br>acid | PTGDR  |
| 10743008 | (2R)-2-<br>[(3S,5R,10S,13R,14R,16R,17R)-<br>3,16-dihydroxy-4,4,10,13,14-<br>pentamethyl-<br>2,3,5,6,12,15,16,17-octahydro-<br>1H-cyclopenta[a]phenanthren-<br>17-yl]-6-methylhept-5-enoic<br>acid | PTGDR2 |
| 10743008 | (2R)-2-<br>[(3S,5R,10S,13R,14R,16R,17R)-<br>3,16-dihydroxy-4,4,10,13,14-<br>pentamethyl-<br>2,3,5,6,12,15,16,17-octahydro-<br>1H-cyclopenta[a]phenanthren-<br>17-yl]-6-methylhept-5-enoic<br>acid | PTGER1 |
| 10743008 | (2R)-2-<br>[(3S,5R,10S,13R,14R,16R,17R)-<br>3,16-dihydroxy-4,4,10,13,14-<br>pentamethyl-<br>2,3,5,6,12,15,16,17-octahydro-<br>1H-cyclopenta[a]phenanthren-<br>17-yl]-6-methylhept-5-enoic<br>acid | PTGER2 |
| 10743008 | (2R)-2-<br>[(3S,5R,10S,13R,14R,16R,17R)-<br>3,16-dihydroxy-4,4,10,13,14-<br>pentamethyl-<br>2,3,5,6,12,15,16,17-octahydro-<br>1H-cyclopenta[a]phenanthren-<br>17-yl]-6-methylhept-5-enoic<br>acid | PTGER3 |

|          |                                                                                                                                                                                                                                                                          |        |
|----------|--------------------------------------------------------------------------------------------------------------------------------------------------------------------------------------------------------------------------------------------------------------------------|--------|
| 10743008 | 2,3,5,6,12,15,16,17-octahydro-1H-cyclopenta[a]phenanthren-17-yl]-6-methylhept-5-enoic acid<br>(2R)-2-<br>[(3S,5R,10S,13R,14R,16R,17R)-3,16-dihydroxy-4,4,10,13,14-pentamethyl-2,3,5,6,12,15,16,17-octahydro-1H-cyclopenta[a]phenanthren-17-yl]-6-methylhept-5-enoic acid | PTGER4 |
| 10743008 | (2R)-2-<br>[(3S,5R,10S,13R,14R,16R,17R)-3,16-dihydroxy-4,4,10,13,14-pentamethyl-2,3,5,6,12,15,16,17-octahydro-1H-cyclopenta[a]phenanthren-17-yl]-6-methylhept-5-enoic acid                                                                                               | PTGES  |
| 10743008 | (2R)-2-<br>[(3S,5R,10S,13R,14R,16R,17R)-3,16-dihydroxy-4,4,10,13,14-pentamethyl-2,3,5,6,12,15,16,17-octahydro-1H-cyclopenta[a]phenanthren-17-yl]-6-methylhept-5-enoic acid                                                                                               | PTGFR  |
| 10743008 | (2R)-2-<br>[(3S,5R,10S,13R,14R,16R,17R)-3,16-dihydroxy-4,4,10,13,14-pentamethyl-2,3,5,6,12,15,16,17-octahydro-1H-cyclopenta[a]phenanthren-17-yl]-6-methylhept-5-enoic acid                                                                                               | PTPN1  |
| 10743008 | (2R)-2-<br>[(3S,5R,10S,13R,14R,16R,17R)-3,16-dihydroxy-4,4,10,13,14-pentamethyl-2,3,5,6,12,15,16,17-octahydro-1H-cyclopenta[a]phenanthren-17-yl]-6-methylhept-5-enoic acid                                                                                               | PTPN11 |

|          |                                                                                                                                                                                                   |          |
|----------|---------------------------------------------------------------------------------------------------------------------------------------------------------------------------------------------------|----------|
| 10743008 | (2R)-2-<br>[(3S,5R,10S,13R,14R,16R,17R)-<br>3,16-dihydroxy-4,4,10,13,14-<br>pentamethyl-<br>2,3,5,6,12,15,16,17-octahydro-<br>1H-cyclopenta[a]phenanthren-<br>17-yl]-6-methylhept-5-enoic<br>acid | PTPN2    |
| 10743008 | (2R)-2-<br>[(3S,5R,10S,13R,14R,16R,17R)-<br>3,16-dihydroxy-4,4,10,13,14-<br>pentamethyl-<br>2,3,5,6,12,15,16,17-octahydro-<br>1H-cyclopenta[a]phenanthren-<br>17-yl]-6-methylhept-5-enoic<br>acid | PTPRF    |
| 10743008 | (2R)-2-<br>[(3S,5R,10S,13R,14R,16R,17R)-<br>3,16-dihydroxy-4,4,10,13,14-<br>pentamethyl-<br>2,3,5,6,12,15,16,17-octahydro-<br>1H-cyclopenta[a]phenanthren-<br>17-yl]-6-methylhept-5-enoic<br>acid | RASGRP3  |
| 10743008 | (2R)-2-<br>[(3S,5R,10S,13R,14R,16R,17R)-<br>3,16-dihydroxy-4,4,10,13,14-<br>pentamethyl-<br>2,3,5,6,12,15,16,17-octahydro-<br>1H-cyclopenta[a]phenanthren-<br>17-yl]-6-methylhept-5-enoic<br>acid | RORC     |
| 10743008 | (2R)-2-<br>[(3S,5R,10S,13R,14R,16R,17R)-<br>3,16-dihydroxy-4,4,10,13,14-<br>pentamethyl-<br>2,3,5,6,12,15,16,17-octahydro-<br>1H-cyclopenta[a]phenanthren-<br>17-yl]-6-methylhept-5-enoic<br>acid | SERPINA6 |
| 10743008 | (2R)-2-<br>[(3S,5R,10S,13R,14R,16R,17R)-<br>3,16-dihydroxy-4,4,10,13,14-<br>pentamethyl-                                                                                                          | SHBG     |

|          |                                                                                            |         |
|----------|--------------------------------------------------------------------------------------------|---------|
| 10743008 | 2,3,5,6,12,15,16,17-octahydro-1H-cyclopenta[a]phenanthren-17-yl]-6-methylhept-5-enoic acid | SIGMAR1 |
|          | (2R)-2-[(3S,5R,10S,13R,14R,16R,17R)-3,16-dihydroxy-4,4,10,13,14-pentamethyl-               |         |
|          | 2,3,5,6,12,15,16,17-octahydro-1H-cyclopenta[a]phenanthren-17-yl]-6-methylhept-5-enoic acid |         |
| 10743008 | (2R)-2-[(3S,5R,10S,13R,14R,16R,17R)-3,16-dihydroxy-4,4,10,13,14-pentamethyl-               | SLC10A1 |
|          | 2,3,5,6,12,15,16,17-octahydro-1H-cyclopenta[a]phenanthren-17-yl]-6-methylhept-5-enoic acid |         |
| 10743008 | (2R)-2-[(3S,5R,10S,13R,14R,16R,17R)-3,16-dihydroxy-4,4,10,13,14-pentamethyl-               | SLC10A2 |
|          | 2,3,5,6,12,15,16,17-octahydro-1H-cyclopenta[a]phenanthren-17-yl]-6-methylhept-5-enoic acid |         |
| 10743008 | (2R)-2-[(3S,5R,10S,13R,14R,16R,17R)-3,16-dihydroxy-4,4,10,13,14-pentamethyl-               | THRA    |
|          | 2,3,5,6,12,15,16,17-octahydro-1H-cyclopenta[a]phenanthren-17-yl]-6-methylhept-5-enoic acid |         |
| 10743008 | (2R)-2-[(3S,5R,10S,13R,14R,16R,17R)-3,16-dihydroxy-4,4,10,13,14-pentamethyl-               | THRB    |
|          | 2,3,5,6,12,15,16,17-octahydro-1H-cyclopenta[a]phenanthren-17-yl]-6-methylhept-5-enoic acid |         |

|          |                                                                                                                                                                                                   |          |
|----------|---------------------------------------------------------------------------------------------------------------------------------------------------------------------------------------------------|----------|
| 10743008 | (2R)-2-<br>[(3S,5R,10S,13R,14R,16R,17R)-<br>3,16-dihydroxy-4,4,10,13,14-<br>pentamethyl-<br>2,3,5,6,12,15,16,17-octahydro-<br>1H-cyclopenta[a]phenanthren-<br>17-yl]-6-methylhept-5-enoic<br>acid | TNF      |
| 10743008 | (2R)-2-<br>[(3S,5R,10S,13R,14R,16R,17R)-<br>3,16-dihydroxy-4,4,10,13,14-<br>pentamethyl-<br>2,3,5,6,12,15,16,17-octahydro-<br>1H-cyclopenta[a]phenanthren-<br>17-yl]-6-methylhept-5-enoic<br>acid | TOP2A    |
| 10743008 | (2R)-2-<br>[(3S,5R,10S,13R,14R,16R,17R)-<br>3,16-dihydroxy-4,4,10,13,14-<br>pentamethyl-<br>2,3,5,6,12,15,16,17-octahydro-<br>1H-cyclopenta[a]phenanthren-<br>17-yl]-6-methylhept-5-enoic<br>acid | TRPM8    |
| 10743008 | (2R)-2-<br>[(3S,5R,10S,13R,14R,16R,17R)-<br>3,16-dihydroxy-4,4,10,13,14-<br>pentamethyl-<br>2,3,5,6,12,15,16,17-octahydro-<br>1H-cyclopenta[a]phenanthren-<br>17-yl]-6-methylhept-5-enoic<br>acid | VDR      |
| 3893     | Lauric Acid                                                                                                                                                                                       | AKR1A1   |
| 3893     | Lauric Acid                                                                                                                                                                                       | AKR1B1   |
| 3893     | Lauric Acid                                                                                                                                                                                       | AKR1B10  |
| 3893     | Lauric Acid                                                                                                                                                                                       | AKR1C3   |
| 3893     | Lauric Acid                                                                                                                                                                                       | AR       |
| 3893     | Lauric Acid                                                                                                                                                                                       | BCL2     |
| 3893     | Lauric Acid                                                                                                                                                                                       | BMP1     |
| 3893     | Lauric Acid                                                                                                                                                                                       | CA1      |
| 3893     | Lauric Acid                                                                                                                                                                                       | CA12     |
| 3893     | Lauric Acid                                                                                                                                                                                       | CA2      |
| 3893     | Lauric Acid                                                                                                                                                                                       | CACNA2D1 |
| 3893     | Lauric Acid                                                                                                                                                                                       | CDC25A   |

|      |             |         |
|------|-------------|---------|
| 3893 | Lauric Acid | CDC45   |
| 3893 | Lauric Acid | CHRNA7  |
| 3893 | Lauric Acid | CMA1    |
| 3893 | Lauric Acid | CTSG    |
| 3893 | Lauric Acid | CXCL8   |
| 3893 | Lauric Acid | CYP19A1 |
| 3893 | Lauric Acid | CYP1A2  |
| 3893 | Lauric Acid | EDNRA   |
| 3893 | Lauric Acid | FABP1   |
| 3893 | Lauric Acid | FABP2   |
| 3893 | Lauric Acid | FABP3   |
| 3893 | Lauric Acid | FABP4   |
| 3893 | Lauric Acid | FABP5   |
| 3893 | Lauric Acid | FFAR1   |
| 3893 | Lauric Acid | FFAR4   |
| 3893 | Lauric Acid | FNTA    |
| 3893 | Lauric Acid | G6PD    |
| 3893 | Lauric Acid | GABBR1  |
| 3893 | Lauric Acid | GABRA2  |
| 3893 | Lauric Acid | GPBAR1  |
| 3893 | Lauric Acid | GRM5    |
| 3893 | Lauric Acid | GSR     |
| 3893 | Lauric Acid | GSTK1   |
| 3893 | Lauric Acid | HAO1    |
| 3893 | Lauric Acid | HMGCR   |
| 3893 | Lauric Acid | HSD11B1 |
| 3893 | Lauric Acid | HSD11B2 |
| 3893 | Lauric Acid | HSD17B3 |
| 3893 | Lauric Acid | IMPDH2  |
| 3893 | Lauric Acid | KDM2A   |
| 3893 | Lauric Acid | KDM5C   |
| 3893 | Lauric Acid | LTA4H   |
| 3893 | Lauric Acid | MAPK1   |
| 3893 | Lauric Acid | MCL1    |
| 3893 | Lauric Acid | MDM2    |
| 3893 | Lauric Acid | MMP12   |
| 3893 | Lauric Acid | MMP13   |
| 3893 | Lauric Acid | MMP14   |
| 3893 | Lauric Acid | MMP2    |
| 3893 | Lauric Acid | MMP9    |
| 3893 | Lauric Acid | NPC1L1  |
| 3893 | Lauric Acid | NR1H4   |
| 3893 | Lauric Acid | PHF8    |
| 3893 | Lauric Acid | PLG     |

|      |               |          |
|------|---------------|----------|
| 3893 | Lauric Acid   | POLB     |
| 3893 | Lauric Acid   | PPARA    |
| 3893 | Lauric Acid   | PPARD    |
| 3893 | Lauric Acid   | PTGDR    |
| 3893 | Lauric Acid   | PTGDR2   |
| 3893 | Lauric Acid   | PTGER2   |
| 3893 | Lauric Acid   | PTGER3   |
| 3893 | Lauric Acid   | PTGER4   |
| 3893 | Lauric Acid   | PTGES    |
| 3893 | Lauric Acid   | PTGFR    |
| 3893 | Lauric Acid   | PTPN1    |
| 3893 | Lauric Acid   | PTPRC    |
| 3893 | Lauric Acid   | RARA     |
| 3893 | Lauric Acid   | RARB     |
| 3893 | Lauric Acid   | RARG     |
| 3893 | Lauric Acid   | RBP4     |
| 3893 | Lauric Acid   | RXRA     |
| 3893 | Lauric Acid   | SAE1     |
| 3893 | Lauric Acid   | SERPINA6 |
| 3893 | Lauric Acid   | SHBG     |
| 3893 | Lauric Acid   | SLC16A1  |
| 3893 | Lauric Acid   | SLC22A12 |
| 3893 | Lauric Acid   | SLC22A6  |
| 3893 | Lauric Acid   | SLC6A4   |
| 3893 | Lauric Acid   | STS      |
| 3893 | Lauric Acid   | TBXA2R   |
| 3893 | Lauric Acid   | THRA     |
| 3893 | Lauric Acid   | THRB     |
| 3893 | Lauric Acid   | TRPA1    |
| 3893 | Lauric Acid   | TTR      |
| 3893 | Lauric Acid   | UGT2B7   |
| 3893 | Lauric Acid   | VDR      |
| 379  | Caprylic Acid | AKR1B1   |
| 379  | Caprylic Acid | AKR1B10  |
| 379  | Caprylic Acid | AR       |
| 379  | Caprylic Acid | CA1      |
| 379  | Caprylic Acid | CA2      |
| 379  | Caprylic Acid | CACNA2D1 |
| 379  | Caprylic Acid | CDC25A   |
| 379  | Caprylic Acid | CDC45    |
| 379  | Caprylic Acid | CYP19A1  |
| 379  | Caprylic Acid | FABP2    |
| 379  | Caprylic Acid | FABP3    |
| 379  | Caprylic Acid | FABP4    |



|        |                 |          |
|--------|-----------------|----------|
| 379    | Caprylic Acid   | FABP5    |
| 379    | Caprylic Acid   | FDFT1    |
| 379    | Caprylic Acid   | FFAR1    |
| 379    | Caprylic Acid   | FNTA     |
| 379    | Caprylic Acid   | G6PD     |
| 379    | Caprylic Acid   | GABBR1   |
| 379    | Caprylic Acid   | GABRA2   |
| 379    | Caprylic Acid   | GPBAR1   |
| 379    | Caprylic Acid   | GRM5     |
| 379    | Caprylic Acid   | GSTK1    |
| 379    | Caprylic Acid   | HAO1     |
| 379    | Caprylic Acid   | HSD11B1  |
| 379    | Caprylic Acid   | HSD11B2  |
| 379    | Caprylic Acid   | HSD17B3  |
| 379    | Caprylic Acid   | KDM2A    |
| 379    | Caprylic Acid   | KDM5C    |
| 379    | Caprylic Acid   | NPC1L1   |
| 379    | Caprylic Acid   | NR1H4    |
| 379    | Caprylic Acid   | PHF8     |
| 379    | Caprylic Acid   | PLG      |
| 379    | Caprylic Acid   | POLB     |
| 379    | Caprylic Acid   | PPARA    |
| 379    | Caprylic Acid   | PPARD    |
| 379    | Caprylic Acid   | PTGDR2   |
| 379    | Caprylic Acid   | PTGER2   |
| 379    | Caprylic Acid   | PTGES    |
| 379    | Caprylic Acid   | PTGFR    |
| 379    | Caprylic Acid   | PTGS2    |
| 379    | Caprylic Acid   | PTPN1    |
| 379    | Caprylic Acid   | SAE1     |
| 379    | Caprylic Acid   | SERPINA6 |
| 379    | Caprylic Acid   | SHBG     |
| 379    | Caprylic Acid   | SLC22A6  |
| 379    | Caprylic Acid   | UGT2B7   |
| 379    | Caprylic Acid   | VDR      |
| 125207 | Dodecenoic Acid | ACP1     |
| 125207 | Dodecenoic Acid | AKR1B1   |
| 125207 | Dodecenoic Acid | AKR1B10  |
| 125207 | Dodecenoic Acid | AR       |
| 125207 | Dodecenoic Acid | CDC25A   |
| 125207 | Dodecenoic Acid | CDC25C   |
| 125207 | Dodecenoic Acid | CES2     |
| 125207 | Dodecenoic Acid | CMA1     |
| 125207 | Dodecenoic Acid | CNR1     |

|        |                 |         |
|--------|-----------------|---------|
| 125207 | Dodecenoic Acid | CSNK2A1 |
| 125207 | Dodecenoic Acid | CTSG    |
| 125207 | Dodecenoic Acid | CYP19A1 |
| 125207 | Dodecenoic Acid | EDNRA   |
| 125207 | Dodecenoic Acid | FAAH    |
| 125207 | Dodecenoic Acid | FABP1   |
| 125207 | Dodecenoic Acid | FABP2   |
| 125207 | Dodecenoic Acid | FABP3   |
| 125207 | Dodecenoic Acid | FABP4   |
| 125207 | Dodecenoic Acid | FABP5   |
| 125207 | Dodecenoic Acid | FFAR1   |
| 125207 | Dodecenoic Acid | FFAR4   |
| 125207 | Dodecenoic Acid | G6PD    |
| 125207 | Dodecenoic Acid | GABBR1  |
| 125207 | Dodecenoic Acid | GSR     |
| 125207 | Dodecenoic Acid | HMGCR   |
| 125207 | Dodecenoic Acid | HSD11B1 |
| 125207 | Dodecenoic Acid | HSD17B3 |
| 125207 | Dodecenoic Acid | IMPDH2  |
| 125207 | Dodecenoic Acid | KDM2A   |
| 125207 | Dodecenoic Acid | KDM5C   |
| 125207 | Dodecenoic Acid | LTB4R   |
| 125207 | Dodecenoic Acid | MAPK1   |
| 125207 | Dodecenoic Acid | MAPK14  |
| 125207 | Dodecenoic Acid | MMP12   |
| 125207 | Dodecenoic Acid | MMP2    |
| 125207 | Dodecenoic Acid | NR1H3   |
| 125207 | Dodecenoic Acid | NR1H4   |
| 125207 | Dodecenoic Acid | PDE4A   |
| 125207 | Dodecenoic Acid | PDE4B   |
| 125207 | Dodecenoic Acid | PDE4D   |
| 125207 | Dodecenoic Acid | PHF8    |
| 125207 | Dodecenoic Acid | PIN1    |
| 125207 | Dodecenoic Acid | POLB    |
| 125207 | Dodecenoic Acid | PPARA   |
| 125207 | Dodecenoic Acid | PPARD   |
| 125207 | Dodecenoic Acid | PPARG   |
| 125207 | Dodecenoic Acid | PREP    |
| 125207 | Dodecenoic Acid | PTGES   |
| 125207 | Dodecenoic Acid | PTGFR   |
| 125207 | Dodecenoic Acid | PTGS1   |
| 125207 | Dodecenoic Acid | PTGS2   |
| 125207 | Dodecenoic Acid | PTPN1   |
| 125207 | Dodecenoic Acid | PTPN2   |

|          |                                           |          |
|----------|-------------------------------------------|----------|
| 125207   | Dodecenoic Acid                           | PTPN6    |
| 125207   | Dodecenoic Acid                           | PTPRF    |
| 125207   | Dodecenoic Acid                           | RARA     |
| 125207   | Dodecenoic Acid                           | RARB     |
| 125207   | Dodecenoic Acid                           | RARG     |
| 125207   | Dodecenoic Acid                           | RORC     |
| 125207   | Dodecenoic Acid                           | SAE1     |
| 125207   | Dodecenoic Acid                           | SCD      |
| 125207   | Dodecenoic Acid                           | SERPINA6 |
| 125207   | Dodecenoic Acid                           | SHBG     |
| 125207   | Dodecenoic Acid                           | SLC16A1  |
| 125207   | Dodecenoic Acid                           | SLC22A12 |
| 125207   | Dodecenoic Acid                           | SLC22A6  |
| 125207   | Dodecenoic Acid                           | TERT     |
| 125207   | Dodecenoic Acid                           | THRA     |
| 125207   | Dodecenoic Acid                           | THRB     |
| 125207   | Dodecenoic Acid                           | TOP1     |
| 125207   | Dodecenoic Acid                           | TOP2A    |
| 125207   | Dodecenoic Acid                           | UGT2B7   |
| 125207   | Dodecenoic Acid                           | VDR      |
| 190      | Adenine                                   | ADORA1   |
| 190      | Adenine                                   | ADORA2A  |
| 190      | Adenine                                   | ADORA2B  |
| 190      | Adenine                                   | CCNE1    |
| 190      | Adenine                                   | GDA      |
| 10368709 | 25-Hydroxy-3-<br>Epidehydrotumulosic Acid | ACE      |
| 10368709 | 25-Hydroxy-3-<br>Epidehydrotumulosic Acid | ACP1     |
| 10368709 | 25-Hydroxy-3-<br>Epidehydrotumulosic Acid | AGTR1    |
| 10368709 | 25-Hydroxy-3-<br>Epidehydrotumulosic Acid | AGTR2    |
| 10368709 | 25-Hydroxy-3-<br>Epidehydrotumulosic Acid | AKR1B10  |
| 10368709 | 25-Hydroxy-3-<br>Epidehydrotumulosic Acid | ALOX12   |
| 10368709 | 25-Hydroxy-3-<br>Epidehydrotumulosic Acid | ALOX5AP  |
| 10368709 | 25-Hydroxy-3-<br>Epidehydrotumulosic Acid | AR       |
| 10368709 | 25-Hydroxy-3-<br>Epidehydrotumulosic Acid | BACE1    |

|          |                                       |         |
|----------|---------------------------------------|---------|
| 10368709 | 25-Hydroxy-3-Epidehydrotumulosic Acid | CASP1   |
| 10368709 | 25-Hydroxy-3-Epidehydrotumulosic Acid | CASP3   |
| 10368709 | 25-Hydroxy-3-Epidehydrotumulosic Acid | CASP8   |
| 10368709 | 25-Hydroxy-3-Epidehydrotumulosic Acid | CCR1    |
| 10368709 | 25-Hydroxy-3-Epidehydrotumulosic Acid | CD81    |
| 10368709 | 25-Hydroxy-3-Epidehydrotumulosic Acid | CDC25B  |
| 10368709 | 25-Hydroxy-3-Epidehydrotumulosic Acid | CES2    |
| 10368709 | 25-Hydroxy-3-Epidehydrotumulosic Acid | CTSA    |
| 10368709 | 25-Hydroxy-3-Epidehydrotumulosic Acid | CYP17A1 |
| 10368709 | 25-Hydroxy-3-Epidehydrotumulosic Acid | CYP19A1 |
| 10368709 | 25-Hydroxy-3-Epidehydrotumulosic Acid | CYP51A1 |
| 10368709 | 25-Hydroxy-3-Epidehydrotumulosic Acid | CYSLTR1 |
| 10368709 | 25-Hydroxy-3-Epidehydrotumulosic Acid | EDNRA   |
| 10368709 | 25-Hydroxy-3-Epidehydrotumulosic Acid | EDNRB   |
| 10368709 | 25-Hydroxy-3-Epidehydrotumulosic Acid | ESR1    |
| 10368709 | 25-Hydroxy-3-Epidehydrotumulosic Acid | ESR2    |
| 10368709 | 25-Hydroxy-3-Epidehydrotumulosic Acid | F10     |
| 10368709 | 25-Hydroxy-3-Epidehydrotumulosic Acid | F11     |
| 10368709 | 25-Hydroxy-3-Epidehydrotumulosic Acid | FDFT1   |
| 10368709 | 25-Hydroxy-3-Epidehydrotumulosic Acid | FNTA    |
| 10368709 | 25-Hydroxy-3-Epidehydrotumulosic Acid | G6PD    |
| 10368709 | 25-Hydroxy-3-Epidehydrotumulosic Acid | GPBAR1  |

|          |                                           |          |
|----------|-------------------------------------------|----------|
| 10368709 | 25-Hydroxy-3-<br>Epidehydrotumulosic Acid | HMGCR    |
| 10368709 | 25-Hydroxy-3-<br>Epidehydrotumulosic Acid | HSD11B1  |
| 10368709 | 25-Hydroxy-3-<br>Epidehydrotumulosic Acid | HSD11B2  |
| 10368709 | 25-Hydroxy-3-<br>Epidehydrotumulosic Acid | HSP90AB1 |
| 10368709 | 25-Hydroxy-3-<br>Epidehydrotumulosic Acid | IMPDH1   |
| 10368709 | 25-Hydroxy-3-<br>Epidehydrotumulosic Acid | IMPDH2   |
| 10368709 | 25-Hydroxy-3-<br>Epidehydrotumulosic Acid | ITGA2B   |
| 10368709 | 25-Hydroxy-3-<br>Epidehydrotumulosic Acid | ITGA4    |
| 10368709 | 25-Hydroxy-3-<br>Epidehydrotumulosic Acid | ITGAV    |
| 10368709 | 25-Hydroxy-3-<br>Epidehydrotumulosic Acid | ITGAV    |
| 10368709 | 25-Hydroxy-3-<br>Epidehydrotumulosic Acid | ITGAV    |
| 10368709 | 25-Hydroxy-3-<br>Epidehydrotumulosic Acid | ITGAV    |
| 10368709 | 25-Hydroxy-3-<br>Epidehydrotumulosic Acid | ITGB1    |
| 10368709 | 25-Hydroxy-3-<br>Epidehydrotumulosic Acid | ITGB5    |
| 10368709 | 25-Hydroxy-3-<br>Epidehydrotumulosic Acid | KCNH2    |
| 10368709 | 25-Hydroxy-3-<br>Epidehydrotumulosic Acid | LNPEP    |
| 10368709 | 25-Hydroxy-3-<br>Epidehydrotumulosic Acid | LTB4R    |
| 10368709 | 25-Hydroxy-3-<br>Epidehydrotumulosic Acid | MME      |
| 10368709 | 25-Hydroxy-3-<br>Epidehydrotumulosic Acid | MMP1     |
| 10368709 | 25-Hydroxy-3-<br>Epidehydrotumulosic Acid | MMP10    |
| 10368709 | 25-Hydroxy-3-<br>Epidehydrotumulosic Acid | MMP12    |
| 10368709 | 25-Hydroxy-3-<br>Epidehydrotumulosic Acid | MMP13    |
| 10368709 | 25-Hydroxy-3-<br>Epidehydrotumulosic Acid | MMP2     |

|          |                                       |         |
|----------|---------------------------------------|---------|
| 10368709 | 25-Hydroxy-3-Epidehydrotumulosic Acid | MMP3    |
| 10368709 | 25-Hydroxy-3-Epidehydrotumulosic Acid | MMP8    |
| 10368709 | 25-Hydroxy-3-Epidehydrotumulosic Acid | MMP9    |
| 10368709 | 25-Hydroxy-3-Epidehydrotumulosic Acid | NOS2    |
| 10368709 | 25-Hydroxy-3-Epidehydrotumulosic Acid | NR3C1   |
| 10368709 | 25-Hydroxy-3-Epidehydrotumulosic Acid | OPRD1   |
| 10368709 | 25-Hydroxy-3-Epidehydrotumulosic Acid | OPRK1   |
| 10368709 | 25-Hydroxy-3-Epidehydrotumulosic Acid | PDE4D   |
| 10368709 | 25-Hydroxy-3-Epidehydrotumulosic Acid | PDE5A   |
| 10368709 | 25-Hydroxy-3-Epidehydrotumulosic Acid | PGR     |
| 10368709 | 25-Hydroxy-3-Epidehydrotumulosic Acid | PIK3CA  |
| 10368709 | 25-Hydroxy-3-Epidehydrotumulosic Acid | PLA2G1B |
| 10368709 | 25-Hydroxy-3-Epidehydrotumulosic Acid | POLB    |
| 10368709 | 25-Hydroxy-3-Epidehydrotumulosic Acid | PPARA   |
| 10368709 | 25-Hydroxy-3-Epidehydrotumulosic Acid | PPARD   |
| 10368709 | 25-Hydroxy-3-Epidehydrotumulosic Acid | PPARG   |
| 10368709 | 25-Hydroxy-3-Epidehydrotumulosic Acid | PRKCH   |
| 10368709 | 25-Hydroxy-3-Epidehydrotumulosic Acid | PTGDR   |
| 10368709 | 25-Hydroxy-3-Epidehydrotumulosic Acid | PTGDR2  |
| 10368709 | 25-Hydroxy-3-Epidehydrotumulosic Acid | PTGER1  |
| 10368709 | 25-Hydroxy-3-Epidehydrotumulosic Acid | PTGER2  |
| 10368709 | 25-Hydroxy-3-Epidehydrotumulosic Acid | PTGER3  |

|          |                                           |          |
|----------|-------------------------------------------|----------|
| 10368709 | 25-Hydroxy-3-<br>Epidehydrotumulosic Acid | PTGER4   |
| 10368709 | 25-Hydroxy-3-<br>Epidehydrotumulosic Acid | PTGES    |
| 10368709 | 25-Hydroxy-3-<br>Epidehydrotumulosic Acid | PTGFR    |
| 10368709 | 25-Hydroxy-3-<br>Epidehydrotumulosic Acid | PTPN1    |
| 10368709 | 25-Hydroxy-3-<br>Epidehydrotumulosic Acid | PTPN11   |
| 10368709 | 25-Hydroxy-3-<br>Epidehydrotumulosic Acid | PTPN2    |
| 10368709 | 25-Hydroxy-3-<br>Epidehydrotumulosic Acid | PTPRF    |
| 10368709 | 25-Hydroxy-3-<br>Epidehydrotumulosic Acid | RASGRP3  |
| 10368709 | 25-Hydroxy-3-<br>Epidehydrotumulosic Acid | REN      |
| 10368709 | 25-Hydroxy-3-<br>Epidehydrotumulosic Acid | RORC     |
| 10368709 | 25-Hydroxy-3-<br>Epidehydrotumulosic Acid | S1PR2    |
| 10368709 | 25-Hydroxy-3-<br>Epidehydrotumulosic Acid | SERPINA6 |
| 10368709 | 25-Hydroxy-3-<br>Epidehydrotumulosic Acid | SHBG     |
| 10368709 | 25-Hydroxy-3-<br>Epidehydrotumulosic Acid | TBXAS1   |
| 10368709 | 25-Hydroxy-3-<br>Epidehydrotumulosic Acid | THRA     |
| 10368709 | 25-Hydroxy-3-<br>Epidehydrotumulosic Acid | THRB     |
| 10368709 | 25-Hydroxy-3-<br>Epidehydrotumulosic Acid | TNF      |
| 10368709 | 25-Hydroxy-3-<br>Epidehydrotumulosic Acid | TOP2A    |
| 10368709 | 25-Hydroxy-3-<br>Epidehydrotumulosic Acid | TRPM8    |
| 10368709 | 25-Hydroxy-3-<br>Epidehydrotumulosic Acid | TYMS     |
| 10368709 | 25-Hydroxy-3-<br>Epidehydrotumulosic Acid | VDR      |
| 10368709 | 25-Hydroxy-3-<br>Epidehydrotumulosic Acid | XIAP     |

|      |                 |          |
|------|-----------------|----------|
| 8180 | Undecanoic Acid | AKR1B1   |
| 8180 | Undecanoic Acid | AKR1B10  |
| 8180 | Undecanoic Acid | AKR1C3   |
| 8180 | Undecanoic Acid | AR       |
| 8180 | Undecanoic Acid | BCAT2    |
| 8180 | Undecanoic Acid | CA1      |
| 8180 | Undecanoic Acid | CA12     |
| 8180 | Undecanoic Acid | CA2      |
| 8180 | Undecanoic Acid | CACNA2D1 |
| 8180 | Undecanoic Acid | CDC25A   |
| 8180 | Undecanoic Acid | CDC45    |
| 8180 | Undecanoic Acid | CHRNA7   |
| 8180 | Undecanoic Acid | CYP19A1  |
| 8180 | Undecanoic Acid | DUSP3    |
| 8180 | Undecanoic Acid | FABP2    |
| 8180 | Undecanoic Acid | FABP3    |
| 8180 | Undecanoic Acid | FABP4    |
| 8180 | Undecanoic Acid | FABP5    |
| 8180 | Undecanoic Acid | FFAR1    |
| 8180 | Undecanoic Acid | FFAR4    |
| 8180 | Undecanoic Acid | FNTA     |
| 8180 | Undecanoic Acid | G6PD     |
| 8180 | Undecanoic Acid | GABBR1   |
| 8180 | Undecanoic Acid | GABRA2   |
| 8180 | Undecanoic Acid | GPBAR1   |
| 8180 | Undecanoic Acid | GRM5     |
| 8180 | Undecanoic Acid | GSTK1    |
| 8180 | Undecanoic Acid | HAO1     |
| 8180 | Undecanoic Acid | HMGCR    |
| 8180 | Undecanoic Acid | HSD11B1  |
| 8180 | Undecanoic Acid | HSD11B2  |
| 8180 | Undecanoic Acid | HSD17B3  |
| 8180 | Undecanoic Acid | IMPDH2   |
| 8180 | Undecanoic Acid | KDM2A    |
| 8180 | Undecanoic Acid | KDM5C    |
| 8180 | Undecanoic Acid | LTA4H    |
| 8180 | Undecanoic Acid | NPC1L1   |
| 8180 | Undecanoic Acid | NR1H4    |
| 8180 | Undecanoic Acid | PHF8     |
| 8180 | Undecanoic Acid | POLB     |
| 8180 | Undecanoic Acid | PPARA    |
| 8180 | Undecanoic Acid | PPARD    |
| 8180 | Undecanoic Acid | PTGDR2   |
| 8180 | Undecanoic Acid | PTGER2   |



|       |                 |          |
|-------|-----------------|----------|
| 8180  | Undecanoic Acid | PTGFR    |
| 8180  | Undecanoic Acid | PTPN1    |
| 8180  | Undecanoic Acid | PTPRC    |
| 8180  | Undecanoic Acid | RARA     |
| 8180  | Undecanoic Acid | RARB     |
| 8180  | Undecanoic Acid | RARG     |
| 8180  | Undecanoic Acid | RBP4     |
| 8180  | Undecanoic Acid | RXRA     |
| 8180  | Undecanoic Acid | SAE1     |
| 8180  | Undecanoic Acid | SERPINA6 |
| 8180  | Undecanoic Acid | SHBG     |
| 8180  | Undecanoic Acid | SLC16A1  |
| 8180  | Undecanoic Acid | SLC22A12 |
| 8180  | Undecanoic Acid | SLC22A6  |
| 8180  | Undecanoic Acid | TBXA2R   |
| 8180  | Undecanoic Acid | THRA     |
| 8180  | Undecanoic Acid | THRB     |
| 8180  | Undecanoic Acid | UGT2B7   |
| 8180  | Undecanoic Acid | VDR      |
| 91510 | Inermine        | ADAM17   |
| 91510 | Inermine        | ADCY5    |
| 91510 | Inermine        | ALOX12   |
| 91510 | Inermine        | ALOX15   |
| 91510 | Inermine        | AR       |
| 91510 | Inermine        | BRAF     |
| 91510 | Inermine        | CA14     |
| 91510 | Inermine        | CCND1    |
| 91510 | Inermine        | CCND2    |
| 91510 | Inermine        | CCND3    |
| 91510 | Inermine        | CDK4     |
| 91510 | Inermine        | CHEK1    |
| 91510 | Inermine        | CHEK2    |
| 91510 | Inermine        | CLK1     |
| 91510 | Inermine        | DGAT1    |
| 91510 | Inermine        | DYRK1B   |
| 91510 | Inermine        | ERN1     |
| 91510 | Inermine        | ESR1     |
| 91510 | Inermine        | ESRRA    |
| 91510 | Inermine        | ESRRB    |
| 91510 | Inermine        | EZR      |
| 91510 | Inermine        | F3       |
| 91510 | Inermine        | GRK2     |
| 91510 | Inermine        | GSK3B    |
| 91510 | Inermine        | GSTM2    |

|         |           |          |
|---------|-----------|----------|
| 91510   | Inermine  | GSTP1    |
| 91510   | Inermine  | HDAC2    |
| 91510   | Inermine  | HDAC2    |
| 91510   | Inermine  | HDAC4    |
| 91510   | Inermine  | HSD17B2  |
| 91510   | Inermine  | HSD17B3  |
| 91510   | Inermine  | IKBKB    |
| 91510   | Inermine  | IMPDH1   |
| 91510   | Inermine  | IMPDH2   |
| 91510   | Inermine  | JAK3     |
| 91510   | Inermine  | KDR      |
| 91510   | Inermine  | LCK      |
| 91510   | Inermine  | LNPEP    |
| 91510   | Inermine  | MAP3K8   |
| 91510   | Inermine  | MAPKAPK2 |
| 91510   | Inermine  | MIF      |
| 91510   | Inermine  | MMP8     |
| 91510   | Inermine  | MTOR     |
| 91510   | Inermine  | NEK1     |
| 91510   | Inermine  | PARP1    |
| 91510   | Inermine  | PGF      |
| 91510   | Inermine  | PIK3CA   |
| 91510   | Inermine  | PIK3CB   |
| 91510   | Inermine  | PIK3CD   |
| 91510   | Inermine  | PIK3CG   |
| 91510   | Inermine  | PIM2     |
| 91510   | Inermine  | PTPN1    |
| 91510   | Inermine  | RAF1     |
| 91510   | Inermine  | RET      |
| 91510   | Inermine  | RPS6KA1  |
| 91510   | Inermine  | RPS6KA3  |
| 91510   | Inermine  | SRC      |
| 91510   | Inermine  | SYK      |
| 91510   | Inermine  | TBK1     |
| 91510   | Inermine  | TNKS     |
| 91510   | Inermine  | TNKS2    |
| 91510   | Inermine  | TRPM8    |
| 91510   | Inermine  | TTR      |
| 91510   | Inermine  | TUBB1    |
| 91510   | Inermine  | VEGFA    |
| 91510   | Inermine  | WEE1     |
| 5280448 | Calycosin | ABCB1    |
| 5280448 | Calycosin | ABCC1    |
| 5280448 | Calycosin | ABCG2    |

|         |           |          |
|---------|-----------|----------|
| 5280448 | Calycosin | ACHE     |
| 5280448 | Calycosin | ADORA1   |
| 5280448 | Calycosin | ADORA2A  |
| 5280448 | Calycosin | ALDH2    |
| 5280448 | Calycosin | ALOX12   |
| 5280448 | Calycosin | ALOX15   |
| 5280448 | Calycosin | CA1      |
| 5280448 | Calycosin | CA12     |
| 5280448 | Calycosin | CA2      |
| 5280448 | Calycosin | CA4      |
| 5280448 | Calycosin | CA5B     |
| 5280448 | Calycosin | CA7      |
| 5280448 | Calycosin | CBR1     |
| 5280448 | Calycosin | CDC25B   |
| 5280448 | Calycosin | CDC7     |
| 5280448 | Calycosin | CYP19A1  |
| 5280448 | Calycosin | CYP1B1   |
| 5280448 | Calycosin | DUSP3    |
| 5280448 | Calycosin | EGFR     |
| 5280448 | Calycosin | ESR1     |
| 5280448 | Calycosin | ESR2     |
| 5280448 | Calycosin | ESRRA    |
| 5280448 | Calycosin | ESRRB    |
| 5280448 | Calycosin | F10      |
| 5280448 | Calycosin | HSD17B1  |
| 5280448 | Calycosin | HSD17B2  |
| 5280448 | Calycosin | HSP90AB1 |
| 5280448 | Calycosin | HTR2A    |
| 5280448 | Calycosin | HTR2C    |
| 5280448 | Calycosin | IL2      |
| 5280448 | Calycosin | MAOA     |
| 5280448 | Calycosin | MAOB     |
| 5280448 | Calycosin | MGAM     |
| 5280448 | Calycosin | MIF      |
| 5280448 | Calycosin | NOX4     |
| 5280448 | Calycosin | PFKFB3   |
| 5280448 | Calycosin | PLAT     |
| 5280448 | Calycosin | PLAU     |
| 5280448 | Calycosin | PON1     |
| 5280448 | Calycosin | PPARA    |
| 5280448 | Calycosin | PTGS1    |
| 5280448 | Calycosin | PTPN1    |
| 5280448 | Calycosin | PTPRS    |
| 5280448 | Calycosin | SLC6A2   |

|         |            |         |
|---------|------------|---------|
| 5280448 | Calycosin  | STS     |
| 5280448 | Calycosin  | TBXAS1  |
| 5280448 | Calycosin  | TLR9    |
| 5280448 | Calycosin  | TYR     |
| 5280448 | Calycosin  | XDH     |
| 5280863 | kaempferol | ABCB1   |
| 5280863 | kaempferol | ABCC1   |
| 5280863 | kaempferol | ABCG2   |
| 5280863 | kaempferol | ACHE    |
| 5280863 | kaempferol | ADORA1  |
| 5280863 | kaempferol | ADORA2A |
| 5280863 | kaempferol | AHR     |
| 5280863 | kaempferol | AKR1A1  |
| 5280863 | kaempferol | AKR1B1  |
| 5280863 | kaempferol | AKR1B10 |
| 5280863 | kaempferol | AKR1C1  |
| 5280863 | kaempferol | AKR1C2  |
| 5280863 | kaempferol | AKR1C3  |
| 5280863 | kaempferol | AKR1C4  |
| 5280863 | kaempferol | AKT1    |
| 5280863 | kaempferol | ALK     |
| 5280863 | kaempferol | ALOX12  |
| 5280863 | kaempferol | ALOX15  |
| 5280863 | kaempferol | ALOX5   |
| 5280863 | kaempferol | AMY1A   |
| 5280863 | kaempferol | APP     |
| 5280863 | kaempferol | ARG1    |
| 5280863 | kaempferol | AURKB   |
| 5280863 | kaempferol | AVPR2   |
| 5280863 | kaempferol | AXL     |
| 5280863 | kaempferol | BACE1   |
| 5280863 | kaempferol | BCHE    |
| 5280863 | kaempferol | CA1     |
| 5280863 | kaempferol | CA12    |
| 5280863 | kaempferol | CA13    |
| 5280863 | kaempferol | CA14    |
| 5280863 | kaempferol | CA2     |
| 5280863 | kaempferol | CA3     |
| 5280863 | kaempferol | CA4     |
| 5280863 | kaempferol | CA5A    |
| 5280863 | kaempferol | CA6     |
| 5280863 | kaempferol | CA7     |
| 5280863 | kaempferol | CA9     |
| 5280863 | kaempferol | CAMK2B  |

|         |            |         |
|---------|------------|---------|
| 5280863 | kaempferol | CCNB1   |
| 5280863 | kaempferol | CCNB2   |
| 5280863 | kaempferol | CCNB3   |
| 5280863 | kaempferol | CD38    |
| 5280863 | kaempferol | CDK1    |
| 5280863 | kaempferol | CDK1    |
| 5280863 | kaempferol | CDK2    |
| 5280863 | kaempferol | CDK5    |
| 5280863 | kaempferol | CDK5R1  |
| 5280863 | kaempferol | CDK6    |
| 5280863 | kaempferol | CFTR    |
| 5280863 | kaempferol | CSNK2A1 |
| 5280863 | kaempferol | CXCR1   |
| 5280863 | kaempferol | CYP19A1 |
| 5280863 | kaempferol | CYP1B1  |
| 5280863 | kaempferol | DAPK1   |
| 5280863 | kaempferol | DRD4    |
| 5280863 | kaempferol | EGFR    |
| 5280863 | kaempferol | ESR1    |
| 5280863 | kaempferol | ESR2    |
| 5280863 | kaempferol | ESRRA   |
| 5280863 | kaempferol | F2      |
| 5280863 | kaempferol | FLT3    |
| 5280863 | kaempferol | GLO1    |
| 5280863 | kaempferol | GPR35   |
| 5280863 | kaempferol | GRK6    |
| 5280863 | kaempferol | GSK3B   |
| 5280863 | kaempferol | HSD17B1 |
| 5280863 | kaempferol | HSD17B2 |
| 5280863 | kaempferol | IGF1R   |
| 5280863 | kaempferol | KDR     |
| 5280863 | kaempferol | MAOA    |
| 5280863 | kaempferol | MET     |
| 5280863 | kaempferol | MMP12   |
| 5280863 | kaempferol | MMP13   |
| 5280863 | kaempferol | MMP2    |
| 5280863 | kaempferol | MMP3    |
| 5280863 | kaempferol | MMP9    |
| 5280863 | kaempferol | MPG     |
| 5280863 | kaempferol | MPO     |
| 5280863 | kaempferol | NEK2    |
| 5280863 | kaempferol | NEK6    |
| 5280863 | kaempferol | NOX4    |
| 5280863 | kaempferol | NUAK1   |

|         |            |          |
|---------|------------|----------|
| 5280863 | kaempferol | PARP1    |
| 5280863 | kaempferol | PFKFB3   |
| 5280863 | kaempferol | PIK3R1   |
| 5280863 | kaempferol | PIM1     |
| 5280863 | kaempferol | PKN1     |
| 5280863 | kaempferol | PLA2G1B  |
| 5280863 | kaempferol | PLK1     |
| 5280863 | kaempferol | PTGS2    |
| 5280863 | kaempferol | PTK2     |
| 5280863 | kaempferol | PTPRS    |
| 5280863 | kaempferol | PYGL     |
| 5280863 | kaempferol | SLC22A12 |
| 5280863 | kaempferol | SRC      |
| 5280863 | kaempferol | SYK      |
| 5280863 | kaempferol | TERT     |
| 5280863 | kaempferol | TNKS     |
| 5280863 | kaempferol | TNKS2    |
| 5280863 | kaempferol | TOP1     |
| 5280863 | kaempferol | TTR      |
| 5280863 | kaempferol | TYR      |
| 5280863 | kaempferol | XDH      |
| 439246  | naringenin | ABCC1    |
| 439246  | naringenin | ABCG2    |
| 439246  | naringenin | ADCY5    |
| 439246  | naringenin | ADORA1   |
| 439246  | naringenin | ADORA3   |
| 439246  | naringenin | AKR1B1   |
| 439246  | naringenin | AKR1C3   |
| 439246  | naringenin | ALOX12   |
| 439246  | naringenin | APP      |
| 439246  | naringenin | BACE1    |
| 439246  | naringenin | BCHE     |
| 439246  | naringenin | BCL2     |
| 439246  | naringenin | BCL2L1   |
| 439246  | naringenin | CA1      |
| 439246  | naringenin | CA12     |
| 439246  | naringenin | CA13     |
| 439246  | naringenin | CA2      |
| 439246  | naringenin | CA3      |
| 439246  | naringenin | CA4      |
| 439246  | naringenin | CA5A     |
| 439246  | naringenin | CA5B     |
| 439246  | naringenin | CA6      |
| 439246  | naringenin | CA7      |

|        |            |          |
|--------|------------|----------|
| 439246 | naringenin | CA9      |
| 439246 | naringenin | CBR1     |
| 439246 | naringenin | CDK5     |
| 439246 | naringenin | CDK5R1   |
| 439246 | naringenin | CES1     |
| 439246 | naringenin | CES2     |
| 439246 | naringenin | CHRNA7   |
| 439246 | naringenin | CLK1     |
| 439246 | naringenin | CTSL     |
| 439246 | naringenin | CYP19A1  |
| 439246 | naringenin | CYP1B1   |
| 439246 | naringenin | CYP2C9   |
| 439246 | naringenin | CYP3A4   |
| 439246 | naringenin | DYRK1A   |
| 439246 | naringenin | DYRK1B   |
| 439246 | naringenin | EDNRA    |
| 439246 | naringenin | ESR1     |
| 439246 | naringenin | ESR2     |
| 439246 | naringenin | ESRRA    |
| 439246 | naringenin | ESRRB    |
| 439246 | naringenin | F3       |
| 439246 | naringenin | FGFR1    |
| 439246 | naringenin | GRM5     |
| 439246 | naringenin | HNF4A    |
| 439246 | naringenin | HSD17B1  |
| 439246 | naringenin | HSD17B14 |
| 439246 | naringenin | HSD17B2  |
| 439246 | naringenin | IGF1R    |
| 439246 | naringenin | IGFBP3   |
| 439246 | naringenin | INSR     |
| 439246 | naringenin | KDR      |
| 439246 | naringenin | KIT      |
| 439246 | naringenin | KLK1     |
| 439246 | naringenin | KLK2     |
| 439246 | naringenin | LCK      |
| 439246 | naringenin | MAOB     |
| 439246 | naringenin | MET      |
| 439246 | naringenin | MMP12    |
| 439246 | naringenin | MMP13    |
| 439246 | naringenin | MMP2     |
| 439246 | naringenin | MMP3     |
| 439246 | naringenin | NOX4     |
| 439246 | naringenin | NQO2     |
| 439246 | naringenin | PGF      |

|          |                                                                                                    |          |
|----------|----------------------------------------------------------------------------------------------------|----------|
| 439246   | naringenin                                                                                         | PIK3CA   |
| 439246   | naringenin                                                                                         | PIK3CB   |
| 439246   | naringenin                                                                                         | PLA2G10  |
| 439246   | naringenin                                                                                         | PLA2G1B  |
| 439246   | naringenin                                                                                         | PLA2G2A  |
| 439246   | naringenin                                                                                         | PLA2G5   |
| 439246   | naringenin                                                                                         | POLB     |
| 439246   | naringenin                                                                                         | PPARG    |
| 439246   | naringenin                                                                                         | PTGER1   |
| 439246   | naringenin                                                                                         | PTGER2   |
| 439246   | naringenin                                                                                         | PTGER3   |
| 439246   | naringenin                                                                                         | PTGER4   |
| 439246   | naringenin                                                                                         | PTGS1    |
| 439246   | naringenin                                                                                         | RXRA     |
| 439246   | naringenin                                                                                         | SERPINE1 |
| 439246   | naringenin                                                                                         | SHBG     |
| 439246   | naringenin                                                                                         | SIRT2    |
| 439246   | naringenin                                                                                         | SLC5A2   |
| 439246   | naringenin                                                                                         | SRC      |
| 439246   | naringenin                                                                                         | SYK      |
| 439246   | naringenin                                                                                         | TAS2R31  |
| 439246   | naringenin                                                                                         | VCP      |
| 439246   | naringenin                                                                                         | VEGFA    |
| 439246   | naringenin                                                                                         | WEE1     |
| 439246   | naringenin                                                                                         | YWHAG    |
| 197678   | (2S)-2-[4-hydroxy-3-(3-methylbut-2-enyl)phenyl]-8,8-dimethyl-2,3-dihydropyrano[2,3-f]chromen-4-one | CTSK     |
| 197678   | (2S)-2-[4-hydroxy-3-(3-methylbut-2-enyl)phenyl]-8,8-dimethyl-2,3-dihydropyrano[2,3-f]chromen-4-one | ODC1     |
| 10291003 | euchrenone                                                                                         | ABCC1    |
| 10291003 | euchrenone                                                                                         | ABCG2    |
| 10291003 | euchrenone                                                                                         | ABL1     |
| 10291003 | euchrenone                                                                                         | ACHE     |
| 10291003 | euchrenone                                                                                         | ADAM17   |
| 10291003 | euchrenone                                                                                         | ADORA1   |
| 10291003 | euchrenone                                                                                         | ADORA2A  |
| 10291003 | euchrenone                                                                                         | ADORA2B  |
| 10291003 | euchrenone                                                                                         | ADORA3   |
| 10291003 | euchrenone                                                                                         | ADRA2A   |
| 10291003 | euchrenone                                                                                         | ADRA2B   |



|          |            |         |
|----------|------------|---------|
| 10291003 | euchrenone | ADRA2C  |
| 10291003 | euchrenone | AKR1B1  |
| 10291003 | euchrenone | AKR1B10 |
| 10291003 | euchrenone | AKR1C3  |
| 10291003 | euchrenone | ALOX5   |
| 10291003 | euchrenone | AURKA   |
| 10291003 | euchrenone | BACE1   |
| 10291003 | euchrenone | BCHE    |
| 10291003 | euchrenone | BMP1    |
| 10291003 | euchrenone | BRAF    |
| 10291003 | euchrenone | CA12    |
| 10291003 | euchrenone | CA4     |
| 10291003 | euchrenone | CA7     |
| 10291003 | euchrenone | CAMK2D  |
| 10291003 | euchrenone | CBR1    |
| 10291003 | euchrenone | CDK4    |
| 10291003 | euchrenone | CES1    |
| 10291003 | euchrenone | CES2    |
| 10291003 | euchrenone | CHEK1   |
| 10291003 | euchrenone | CHRNA7  |
| 10291003 | euchrenone | CLK1    |
| 10291003 | euchrenone | CTSK    |
| 10291003 | euchrenone | CTSL    |
| 10291003 | euchrenone | CYP19A1 |
| 10291003 | euchrenone | CYP1B1  |
| 10291003 | euchrenone | DRD1    |
| 10291003 | euchrenone | DRD3    |
| 10291003 | euchrenone | DYRK1B  |
| 10291003 | euchrenone | EPHA1   |
| 10291003 | euchrenone | EPHA2   |
| 10291003 | euchrenone | EPHA3   |
| 10291003 | euchrenone | EPHA4   |
| 10291003 | euchrenone | EPHA5   |
| 10291003 | euchrenone | EPHA7   |
| 10291003 | euchrenone | EPHA8   |
| 10291003 | euchrenone | EPHB1   |
| 10291003 | euchrenone | EPHB2   |
| 10291003 | euchrenone | EPHB3   |
| 10291003 | euchrenone | EPHB4   |
| 10291003 | euchrenone | ESR1    |
| 10291003 | euchrenone | ESR2    |
| 10291003 | euchrenone | ESRRA   |
| 10291003 | euchrenone | ESRRB   |
| 10291003 | euchrenone | GCGR    |

|          |            |          |
|----------|------------|----------|
| 10291003 | euchrenone | GSK3B    |
| 10291003 | euchrenone | HDAC2    |
| 10291003 | euchrenone | HSD17B1  |
| 10291003 | euchrenone | HSD17B2  |
| 10291003 | euchrenone | HSP90AA1 |
| 10291003 | euchrenone | HSP90AB1 |
| 10291003 | euchrenone | KDM1A    |
| 10291003 | euchrenone | KLK1     |
| 10291003 | euchrenone | KLK2     |
| 10291003 | euchrenone | LCK      |
| 10291003 | euchrenone | MAOB     |
| 10291003 | euchrenone | MAPK8    |
| 10291003 | euchrenone | MCL1     |
| 10291003 | euchrenone | MMP1     |
| 10291003 | euchrenone | MMP12    |
| 10291003 | euchrenone | MMP13    |
| 10291003 | euchrenone | MMP3     |
| 10291003 | euchrenone | MMP7     |
| 10291003 | euchrenone | MMP8     |
| 10291003 | euchrenone | NAAA     |
| 10291003 | euchrenone | NOX4     |
| 10291003 | euchrenone | ODC1     |
| 10291003 | euchrenone | PDE7A    |
| 10291003 | euchrenone | PIM1     |
| 10291003 | euchrenone | PIM2     |
| 10291003 | euchrenone | PIM3     |
| 10291003 | euchrenone | PITRM1   |
| 10291003 | euchrenone | PLA2G10  |
| 10291003 | euchrenone | PLA2G1B  |
| 10291003 | euchrenone | PLA2G2A  |
| 10291003 | euchrenone | PLA2G5   |
| 10291003 | euchrenone | POLB     |
| 10291003 | euchrenone | PPARG    |
| 10291003 | euchrenone | PTGS1    |
| 10291003 | euchrenone | PTPN1    |
| 10291003 | euchrenone | RPS6KB1  |
| 10291003 | euchrenone | RXRA     |
| 10291003 | euchrenone | SERPINE1 |
| 10291003 | euchrenone | SGK1     |
| 10291003 | euchrenone | SHBG     |
| 10291003 | euchrenone | SLC5A2   |
| 10291003 | euchrenone | SYK      |
| 10291003 | euchrenone | TAS2R31  |
| 10291003 | euchrenone | TNF      |

|          |              |         |
|----------|--------------|---------|
| 10291003 | euchrenone   | WEE1    |
| 480784   | glyasperin B | ABCG2   |
| 480784   | glyasperin B | ABL1    |
| 480784   | glyasperin B | ACACB   |
| 480784   | glyasperin B | ACVR1   |
| 480784   | glyasperin B | ADAM17  |
| 480784   | glyasperin B | ADAMTS4 |
| 480784   | glyasperin B | ADAMTS5 |
| 480784   | glyasperin B | ADORA2A |
| 480784   | glyasperin B | ADORA2B |
| 480784   | glyasperin B | AKR1B10 |
| 480784   | glyasperin B | ALDH2   |
| 480784   | glyasperin B | ALK     |
| 480784   | glyasperin B | ALOX15  |
| 480784   | glyasperin B | ALPL    |
| 480784   | glyasperin B | AR      |
| 480784   | glyasperin B | AURKA   |
| 480784   | glyasperin B | BLK     |
| 480784   | glyasperin B | BMP1    |
| 480784   | glyasperin B | BMX     |
| 480784   | glyasperin B | BRAF    |
| 480784   | glyasperin B | CASP3   |
| 480784   | glyasperin B | CASP6   |
| 480784   | glyasperin B | CASP7   |
| 480784   | glyasperin B | CCNA1   |
| 480784   | glyasperin B | CCNA2   |
| 480784   | glyasperin B | CCNB1   |
| 480784   | glyasperin B | CCNB1   |
| 480784   | glyasperin B | CCNB2   |
| 480784   | glyasperin B | CCNB3   |
| 480784   | glyasperin B | CCNE1   |
| 480784   | glyasperin B | CCNE1   |
| 480784   | glyasperin B | CDC25A  |
| 480784   | glyasperin B | CDK1    |
| 480784   | glyasperin B | CDK1    |
| 480784   | glyasperin B | CDK2    |
| 480784   | glyasperin B | CDK2    |
| 480784   | glyasperin B | CDK3    |
| 480784   | glyasperin B | CHEK1   |
| 480784   | glyasperin B | CHEK2   |
| 480784   | glyasperin B | CHRNA7  |
| 480784   | glyasperin B | COMT    |
| 480784   | glyasperin B | CSK     |
| 480784   | glyasperin B | CTSL    |

|        |              |          |
|--------|--------------|----------|
| 480784 | glyasperin B | CYP19A1  |
| 480784 | glyasperin B | DRD1     |
| 480784 | glyasperin B | DRD3     |
| 480784 | glyasperin B | ENPP1    |
| 480784 | glyasperin B | EPHA2    |
| 480784 | glyasperin B | EPHB2    |
| 480784 | glyasperin B | ESR1     |
| 480784 | glyasperin B | ESR2     |
| 480784 | glyasperin B | FNTA     |
| 480784 | glyasperin B | FNTB     |
| 480784 | glyasperin B | FYN      |
| 480784 | glyasperin B | GSK3A    |
| 480784 | glyasperin B | GSK3B    |
| 480784 | glyasperin B | GSTP1    |
| 480784 | glyasperin B | HDAC1    |
| 480784 | glyasperin B | HDAC2    |
| 480784 | glyasperin B | HDAC3    |
| 480784 | glyasperin B | HDAC6    |
| 480784 | glyasperin B | HDAC8    |
| 480784 | glyasperin B | HDAC9    |
| 480784 | glyasperin B | HSD17B3  |
| 480784 | glyasperin B | HSP90AA1 |
| 480784 | glyasperin B | IMPDH1   |
| 480784 | glyasperin B | JAK3     |
| 480784 | glyasperin B | KDM1A    |
| 480784 | glyasperin B | KDR      |
| 480784 | glyasperin B | KIT      |
| 480784 | glyasperin B | KLK1     |
| 480784 | glyasperin B | KLK2     |
| 480784 | glyasperin B | LCK      |
| 480784 | glyasperin B | MAOB     |
| 480784 | glyasperin B | MARK1    |
| 480784 | glyasperin B | MMP1     |
| 480784 | glyasperin B | MMP3     |
| 480784 | glyasperin B | MMP7     |
| 480784 | glyasperin B | MMP8     |
| 480784 | glyasperin B | MTOR     |
| 480784 | glyasperin B | MYLK     |
| 480784 | glyasperin B | NPY5R    |
| 480784 | glyasperin B | PDE10A   |
| 480784 | glyasperin B | PDE4A    |
| 480784 | glyasperin B | PDE4B    |
| 480784 | glyasperin B | PDE4C    |
| 480784 | glyasperin B | PDGFRA   |

|        |              |         |
|--------|--------------|---------|
| 480784 | glyasperin B | PDGFRB  |
| 480784 | glyasperin B | PDGFRB  |
| 480784 | glyasperin B | PDK1    |
| 480784 | glyasperin B | PIK3CA  |
| 480784 | glyasperin B | PIM1    |
| 480784 | glyasperin B | PIM2    |
| 480784 | glyasperin B | PIM3    |
| 480784 | glyasperin B | PLAA    |
| 480784 | glyasperin B | PLK1    |
| 480784 | glyasperin B | PPARG   |
| 480784 | glyasperin B | PTPN1   |
| 480784 | glyasperin B | RAF1    |
| 480784 | glyasperin B | RET     |
| 480784 | glyasperin B | ROCK1   |
| 480784 | glyasperin B | ROCK2   |
| 480784 | glyasperin B | RXRA    |
| 480784 | glyasperin B | SCD     |
| 480784 | glyasperin B | STAT6   |
| 480784 | glyasperin B | SYK     |
| 480784 | glyasperin B | TAS2R31 |
| 480784 | glyasperin B | TGFBR1  |
| 480784 | glyasperin B | TYR     |
| 480784 | glyasperin B | YES1    |
| 392442 | glyasperin F | ADAM17  |
| 392442 | glyasperin F | ADORA2A |
| 392442 | glyasperin F | AGTR1   |
| 392442 | glyasperin F | AR      |
| 392442 | glyasperin F | AURKA   |
| 392442 | glyasperin F | AURKB   |
| 392442 | glyasperin F | BCL2    |
| 392442 | glyasperin F | BCL2L1  |
| 392442 | glyasperin F | BMP1    |
| 392442 | glyasperin F | BRAF    |
| 392442 | glyasperin F | CCNB1   |
| 392442 | glyasperin F | CCNE1   |
| 392442 | glyasperin F | CCNE1   |
| 392442 | glyasperin F | CCNE1   |
| 392442 | glyasperin F | CCNE2   |
| 392442 | glyasperin F | CDK1    |
| 392442 | glyasperin F | CDK2    |
| 392442 | glyasperin F | CDK2    |
| 392442 | glyasperin F | CDK3    |
| 392442 | glyasperin F | CHEK1   |
| 392442 | glyasperin F | CHRNA7  |

|        |              |         |
|--------|--------------|---------|
| 392442 | glyasperin F | CSNK1G1 |
| 392442 | glyasperin F | CTSK    |
| 392442 | glyasperin F | DNM1    |
| 392442 | glyasperin F | DPP4    |
| 392442 | glyasperin F | DPP7    |
| 392442 | glyasperin F | DPP8    |
| 392442 | glyasperin F | DRD1    |
| 392442 | glyasperin F | DUT     |
| 392442 | glyasperin F | ECE1    |
| 392442 | glyasperin F | EIF2AK2 |
| 392442 | glyasperin F | EPHB4   |
| 392442 | glyasperin F | ESR1    |
| 392442 | glyasperin F | ESR2    |
| 392442 | glyasperin F | FLT3    |
| 392442 | glyasperin F | GRK2    |
| 392442 | glyasperin F | GUSB    |
| 392442 | glyasperin F | HDAC1   |
| 392442 | glyasperin F | HDAC4   |
| 392442 | glyasperin F | HDAC5   |
| 392442 | glyasperin F | HDAC7   |
| 392442 | glyasperin F | HDAC8   |
| 392442 | glyasperin F | HSD17B2 |
| 392442 | glyasperin F | HTR7    |
| 392442 | glyasperin F | KDM1A   |
| 392442 | glyasperin F | LCK     |
| 392442 | glyasperin F | MAOB    |
| 392442 | glyasperin F | MAPK1   |
| 392442 | glyasperin F | MAPK14  |
| 392442 | glyasperin F | MAPK8   |
| 392442 | glyasperin F | MMP14   |
| 392442 | glyasperin F | MMP15   |
| 392442 | glyasperin F | MMP16   |
| 392442 | glyasperin F | MMP2    |
| 392442 | glyasperin F | MMP26   |
| 392442 | glyasperin F | MMP7    |
| 392442 | glyasperin F | MMP8    |
| 392442 | glyasperin F | NFKB1   |
| 392442 | glyasperin F | NOX4    |
| 392442 | glyasperin F | NR1H4   |
| 392442 | glyasperin F | NTRK1   |
| 392442 | glyasperin F | ODC1    |
| 392442 | glyasperin F | PARP1   |
| 392442 | glyasperin F | PARP2   |
| 392442 | glyasperin F | PDE10A  |

|        |              |         |
|--------|--------------|---------|
| 392442 | glyasperin F | PDE4A   |
| 392442 | glyasperin F | PDE4B   |
| 392442 | glyasperin F | PDE4C   |
| 392442 | glyasperin F | PDE4D   |
| 392442 | glyasperin F | PDK1    |
| 392442 | glyasperin F | PDPK1   |
| 392442 | glyasperin F | PLG     |
| 392442 | glyasperin F | PLK1    |
| 392442 | glyasperin F | PTPN1   |
| 392442 | glyasperin F | RAF1    |
| 392442 | glyasperin F | RELA    |
| 392442 | glyasperin F | RET     |
| 392442 | glyasperin F | ROCK1   |
| 392442 | glyasperin F | RPS6KA1 |
| 392442 | glyasperin F | RPS6KB1 |
| 392442 | glyasperin F | SGK1    |
| 392442 | glyasperin F | SLC29A1 |
| 392442 | glyasperin F | SLC5A1  |
| 392442 | glyasperin F | SPHK1   |
| 392442 | glyasperin F | SPHK2   |
| 392442 | glyasperin F | SYK     |
| 392442 | glyasperin F | TGM2    |
| 392442 | glyasperin F | TNF     |
| 392442 | glyasperin F | TNKS    |
| 392442 | glyasperin F | TNKS2   |
| 392442 | glyasperin F | TRPM8   |
| 392442 | glyasperin F | WEE1    |
| 480859 | Glyasperin C | ACVR1   |
| 480859 | Glyasperin C | ADAM17  |
| 480859 | Glyasperin C | ADAMTS4 |
| 480859 | Glyasperin C | ADAMTS5 |
| 480859 | Glyasperin C | ADORA2A |
| 480859 | Glyasperin C | ADORA2B |
| 480859 | Glyasperin C | ADRA1A  |
| 480859 | Glyasperin C | ADRA1B  |
| 480859 | Glyasperin C | AKR1B10 |
| 480859 | Glyasperin C | ALDH2   |
| 480859 | Glyasperin C | ALOX12  |
| 480859 | Glyasperin C | ALOX15  |
| 480859 | Glyasperin C | ALOX15B |
| 480859 | Glyasperin C | AURKA   |
| 480859 | Glyasperin C | AURKB   |
| 480859 | Glyasperin C | BRAF    |
| 480859 | Glyasperin C | CCKBR   |

|        |              |         |
|--------|--------------|---------|
| 480859 | Glyasperin C | CDC25A  |
| 480859 | Glyasperin C | CDC25B  |
| 480859 | Glyasperin C | CHEK1   |
| 480859 | Glyasperin C | CHEK2   |
| 480859 | Glyasperin C | CHRM2   |
| 480859 | Glyasperin C | CHRM3   |
| 480859 | Glyasperin C | CMA1    |
| 480859 | Glyasperin C | CTSD    |
| 480859 | Glyasperin C | CTSL    |
| 480859 | Glyasperin C | CYP11B1 |
| 480859 | Glyasperin C | CYP11B2 |
| 480859 | Glyasperin C | CYP2C9  |
| 480859 | Glyasperin C | CYP3A4  |
| 480859 | Glyasperin C | DPP4    |
| 480859 | Glyasperin C | EP300   |
| 480859 | Glyasperin C | EPHX2   |
| 480859 | Glyasperin C | ERN1    |
| 480859 | Glyasperin C | ESRRA   |
| 480859 | Glyasperin C | ESRRB   |
| 480859 | Glyasperin C | FAAH    |
| 480859 | Glyasperin C | GNRHR   |
| 480859 | Glyasperin C | GSK3B   |
| 480859 | Glyasperin C | HDAC2   |
| 480859 | Glyasperin C | HDAC3   |
| 480859 | Glyasperin C | HDAC5   |
| 480859 | Glyasperin C | HSD11B1 |
| 480859 | Glyasperin C | HSD17B2 |
| 480859 | Glyasperin C | ICAM1   |
| 480859 | Glyasperin C | ITGAL   |
| 480859 | Glyasperin C | ITGB2   |
| 480859 | Glyasperin C | ITK     |
| 480859 | Glyasperin C | KDM1A   |
| 480859 | Glyasperin C | KIF11   |
| 480859 | Glyasperin C | LCK     |
| 480859 | Glyasperin C | MAOB    |
| 480859 | Glyasperin C | MCL1    |
| 480859 | Glyasperin C | MDM2    |
| 480859 | Glyasperin C | MDM4    |
| 480859 | Glyasperin C | ME1     |
| 480859 | Glyasperin C | MELK    |
| 480859 | Glyasperin C | MIF     |
| 480859 | Glyasperin C | MMP1    |
| 480859 | Glyasperin C | MMP3    |
| 480859 | Glyasperin C | MMP8    |



|         |              |         |
|---------|--------------|---------|
| 480859  | Glyasperin C | MPEG1   |
| 480859  | Glyasperin C | MTOR    |
| 480859  | Glyasperin C | NAAA    |
| 480859  | Glyasperin C | NOX1    |
| 480859  | Glyasperin C | NOX4    |
| 480859  | Glyasperin C | P2RX3   |
| 480859  | Glyasperin C | PDGFRA  |
| 480859  | Glyasperin C | PDGFRB  |
| 480859  | Glyasperin C | PDK1    |
| 480859  | Glyasperin C | PIK3CA  |
| 480859  | Glyasperin C | PTGIR   |
| 480859  | Glyasperin C | PTPN1   |
| 480859  | Glyasperin C | PTPN11  |
| 480859  | Glyasperin C | PTPN6   |
| 480859  | Glyasperin C | RAF1    |
| 480859  | Glyasperin C | RET     |
| 480859  | Glyasperin C | ROCK1   |
| 480859  | Glyasperin C | ROCK2   |
| 480859  | Glyasperin C | RPS6KB1 |
| 480859  | Glyasperin C | S1PR1   |
| 480859  | Glyasperin C | S1PR3   |
| 480859  | Glyasperin C | SAE1    |
| 480859  | Glyasperin C | SCARB1  |
| 480859  | Glyasperin C | SCD     |
| 480859  | Glyasperin C | SLC29A1 |
| 480859  | Glyasperin C | STAT6   |
| 480859  | Glyasperin C | TACR3   |
| 480859  | Glyasperin C | TBXA2R  |
| 480859  | Glyasperin C | TGFBR1  |
| 480859  | Glyasperin C | TRPV1   |
| 480859  | Glyasperin C | TYR     |
| 480859  | Glyasperin C | UBA2    |
| 480859  | Glyasperin C | WEE1    |
| 5318679 | Isotrifoliol | ABCC1   |
| 5318679 | Isotrifoliol | ACHE    |
| 5318679 | Isotrifoliol | AHR     |
| 5318679 | Isotrifoliol | AKR1A1  |
| 5318679 | Isotrifoliol | AKR1B1  |
| 5318679 | Isotrifoliol | AKR1B10 |
| 5318679 | Isotrifoliol | AKR1C2  |
| 5318679 | Isotrifoliol | AKR1C4  |
| 5318679 | Isotrifoliol | ALOX12  |
| 5318679 | Isotrifoliol | ALOX5   |
| 5318679 | Isotrifoliol | APP     |

|         |              |         |
|---------|--------------|---------|
| 5318679 | Isotrifoliol | ARG1    |
| 5318679 | Isotrifoliol | AURKB   |
| 5318679 | Isotrifoliol | AVPR2   |
| 5318679 | Isotrifoliol | CA1     |
| 5318679 | Isotrifoliol | CA12    |
| 5318679 | Isotrifoliol | CA13    |
| 5318679 | Isotrifoliol | CA14    |
| 5318679 | Isotrifoliol | CA2     |
| 5318679 | Isotrifoliol | CA4     |
| 5318679 | Isotrifoliol | CA5A    |
| 5318679 | Isotrifoliol | CA5B    |
| 5318679 | Isotrifoliol | CA6     |
| 5318679 | Isotrifoliol | CA7     |
| 5318679 | Isotrifoliol | CA9     |
| 5318679 | Isotrifoliol | CAMK2B  |
| 5318679 | Isotrifoliol | CBR1    |
| 5318679 | Isotrifoliol | CCNB1   |
| 5318679 | Isotrifoliol | CCNB2   |
| 5318679 | Isotrifoliol | CCNB3   |
| 5318679 | Isotrifoliol | CD38    |
| 5318679 | Isotrifoliol | CDC7    |
| 5318679 | Isotrifoliol | CDK1    |
| 5318679 | Isotrifoliol | CDK1    |
| 5318679 | Isotrifoliol | CDK2    |
| 5318679 | Isotrifoliol | CDK5    |
| 5318679 | Isotrifoliol | CDK5R1  |
| 5318679 | Isotrifoliol | CDK6    |
| 5318679 | Isotrifoliol | CFTR    |
| 5318679 | Isotrifoliol | CRHR1   |
| 5318679 | Isotrifoliol | CSNK2A1 |
| 5318679 | Isotrifoliol | CXCR1   |
| 5318679 | Isotrifoliol | CYP1A2  |
| 5318679 | Isotrifoliol | DAPK1   |
| 5318679 | Isotrifoliol | DHODH   |
| 5318679 | Isotrifoliol | DRD4    |
| 5318679 | Isotrifoliol | EGFR    |
| 5318679 | Isotrifoliol | ESR1    |
| 5318679 | Isotrifoliol | ESR2    |
| 5318679 | Isotrifoliol | ESRRA   |
| 5318679 | Isotrifoliol | ESRRB   |
| 5318679 | Isotrifoliol | F10     |
| 5318679 | Isotrifoliol | F2      |
| 5318679 | Isotrifoliol | FNTA    |
| 5318679 | Isotrifoliol | FNTB    |

|         |              |          |
|---------|--------------|----------|
| 5318679 | Isotrifoliol | GLO1     |
| 5318679 | Isotrifoliol | GPR35    |
| 5318679 | Isotrifoliol | GSK3B    |
| 5318679 | Isotrifoliol | GSR      |
| 5318679 | Isotrifoliol | HSD17B1  |
| 5318679 | Isotrifoliol | HTR2C    |
| 5318679 | Isotrifoliol | IGF1R    |
| 5318679 | Isotrifoliol | IGFBP1   |
| 5318679 | Isotrifoliol | IGFBP2   |
| 5318679 | Isotrifoliol | IGFBP3   |
| 5318679 | Isotrifoliol | IGFBP4   |
| 5318679 | Isotrifoliol | IGFBP5   |
| 5318679 | Isotrifoliol | IGFBP6   |
| 5318679 | Isotrifoliol | KCNA3    |
| 5318679 | Isotrifoliol | KCNA5    |
| 5318679 | Isotrifoliol | KDR      |
| 5318679 | Isotrifoliol | MAOA     |
| 5318679 | Isotrifoliol | MCL1     |
| 5318679 | Isotrifoliol | MET      |
| 5318679 | Isotrifoliol | MGAM     |
| 5318679 | Isotrifoliol | MMP12    |
| 5318679 | Isotrifoliol | MMP13    |
| 5318679 | Isotrifoliol | MMP2     |
| 5318679 | Isotrifoliol | MMP3     |
| 5318679 | Isotrifoliol | MMP9     |
| 5318679 | Isotrifoliol | MPG      |
| 5318679 | Isotrifoliol | MPO      |
| 5318679 | Isotrifoliol | NEK2     |
| 5318679 | Isotrifoliol | NEK6     |
| 5318679 | Isotrifoliol | NOX4     |
| 5318679 | Isotrifoliol | PARP1    |
| 5318679 | Isotrifoliol | PFKFB3   |
| 5318679 | Isotrifoliol | PIK3R1   |
| 5318679 | Isotrifoliol | PKN1     |
| 5318679 | Isotrifoliol | PLA2G1B  |
| 5318679 | Isotrifoliol | PLAT     |
| 5318679 | Isotrifoliol | PLAU     |
| 5318679 | Isotrifoliol | PLK1     |
| 5318679 | Isotrifoliol | PTGS2    |
| 5318679 | Isotrifoliol | PTP4A3   |
| 5318679 | Isotrifoliol | PYGL     |
| 5318679 | Isotrifoliol | SLC22A12 |
| 5318679 | Isotrifoliol | SNCA     |
| 5318679 | Isotrifoliol | SYK      |

|          |                                                                         |         |
|----------|-------------------------------------------------------------------------|---------|
| 5318679  | Isotrifoliol                                                            | TBXAS1  |
| 5318679  | Isotrifoliol                                                            | TERT    |
| 5318679  | Isotrifoliol                                                            | TNKS2   |
| 5318679  | Isotrifoliol                                                            | TOP1    |
| 5318679  | Isotrifoliol                                                            | TYR     |
| 5318679  | Isotrifoliol                                                            | XDH     |
| 10881804 | (E)-1-(2,4-dihydroxyphenyl)-3-(2,2-dimethylchromen-6-yl)prop-2-en-1-one | ABCG2   |
| 10881804 | (E)-1-(2,4-dihydroxyphenyl)-3-(2,2-dimethylchromen-6-yl)prop-2-en-1-one | ADAM17  |
| 10881804 | (E)-1-(2,4-dihydroxyphenyl)-3-(2,2-dimethylchromen-6-yl)prop-2-en-1-one | ADAMTS4 |
| 10881804 | (E)-1-(2,4-dihydroxyphenyl)-3-(2,2-dimethylchromen-6-yl)prop-2-en-1-one | ADAMTS5 |
| 10881804 | (E)-1-(2,4-dihydroxyphenyl)-3-(2,2-dimethylchromen-6-yl)prop-2-en-1-one | AKR1B1  |
| 10881804 | (E)-1-(2,4-dihydroxyphenyl)-3-(2,2-dimethylchromen-6-yl)prop-2-en-1-one | ALDH2   |
| 10881804 | (E)-1-(2,4-dihydroxyphenyl)-3-(2,2-dimethylchromen-6-yl)prop-2-en-1-one | ALOX5   |
| 10881804 | (E)-1-(2,4-dihydroxyphenyl)-3-(2,2-dimethylchromen-6-yl)prop-2-en-1-one | APP     |
| 10881804 | (E)-1-(2,4-dihydroxyphenyl)-3-(2,2-dimethylchromen-6-yl)prop-2-en-1-one | AR      |
| 10881804 | (E)-1-(2,4-dihydroxyphenyl)-3-(2,2-dimethylchromen-6-yl)prop-2-en-1-one | BACE1   |
| 10881804 | (E)-1-(2,4-dihydroxyphenyl)-3-(2,2-dimethylchromen-6-yl)prop-2-en-1-one | BACE2   |
| 10881804 | (E)-1-(2,4-dihydroxyphenyl)-3-(2,2-dimethylchromen-6-yl)prop-2-en-1-one | BMP1    |

|          |                                                                         |         |
|----------|-------------------------------------------------------------------------|---------|
| 10881804 | (E)-1-(2,4-dihydroxyphenyl)-3-(2,2-dimethylchromen-6-yl)prop-2-en-1-one | BRAF    |
| 10881804 | (E)-1-(2,4-dihydroxyphenyl)-3-(2,2-dimethylchromen-6-yl)prop-2-en-1-one | CDC25A  |
| 10881804 | (E)-1-(2,4-dihydroxyphenyl)-3-(2,2-dimethylchromen-6-yl)prop-2-en-1-one | CDC25B  |
| 10881804 | (E)-1-(2,4-dihydroxyphenyl)-3-(2,2-dimethylchromen-6-yl)prop-2-en-1-one | CES1    |
| 10881804 | (E)-1-(2,4-dihydroxyphenyl)-3-(2,2-dimethylchromen-6-yl)prop-2-en-1-one | CES2    |
| 10881804 | (E)-1-(2,4-dihydroxyphenyl)-3-(2,2-dimethylchromen-6-yl)prop-2-en-1-one | CHEK1   |
| 10881804 | (E)-1-(2,4-dihydroxyphenyl)-3-(2,2-dimethylchromen-6-yl)prop-2-en-1-one | CHRNA7  |
| 10881804 | (E)-1-(2,4-dihydroxyphenyl)-3-(2,2-dimethylchromen-6-yl)prop-2-en-1-one | CTSL    |
| 10881804 | (E)-1-(2,4-dihydroxyphenyl)-3-(2,2-dimethylchromen-6-yl)prop-2-en-1-one | CYP11B1 |
| 10881804 | (E)-1-(2,4-dihydroxyphenyl)-3-(2,2-dimethylchromen-6-yl)prop-2-en-1-one | CYP11B2 |
| 10881804 | (E)-1-(2,4-dihydroxyphenyl)-3-(2,2-dimethylchromen-6-yl)prop-2-en-1-one | CYP19A1 |
| 10881804 | (E)-1-(2,4-dihydroxyphenyl)-3-(2,2-dimethylchromen-6-yl)prop-2-en-1-one | DPP4    |
| 10881804 | (E)-1-(2,4-dihydroxyphenyl)-3-(2,2-dimethylchromen-6-yl)prop-2-en-1-one | DRD1    |
| 10881804 | (E)-1-(2,4-dihydroxyphenyl)-3-(2,2-dimethylchromen-6-yl)prop-2-en-1-one | DRD3    |

|          |                                                                         |        |
|----------|-------------------------------------------------------------------------|--------|
| 10881804 | (E)-1-(2,4-dihydroxyphenyl)-3-(2,2-dimethylchromen-6-yl)prop-2-en-1-one | DUSP3  |
| 10881804 | (E)-1-(2,4-dihydroxyphenyl)-3-(2,2-dimethylchromen-6-yl)prop-2-en-1-one | EP300  |
| 10881804 | (E)-1-(2,4-dihydroxyphenyl)-3-(2,2-dimethylchromen-6-yl)prop-2-en-1-one | EPHX2  |
| 10881804 | (E)-1-(2,4-dihydroxyphenyl)-3-(2,2-dimethylchromen-6-yl)prop-2-en-1-one | ERN1   |
| 10881804 | (E)-1-(2,4-dihydroxyphenyl)-3-(2,2-dimethylchromen-6-yl)prop-2-en-1-one | ESRRA  |
| 10881804 | (E)-1-(2,4-dihydroxyphenyl)-3-(2,2-dimethylchromen-6-yl)prop-2-en-1-one | F3     |
| 10881804 | (E)-1-(2,4-dihydroxyphenyl)-3-(2,2-dimethylchromen-6-yl)prop-2-en-1-one | FAAH   |
| 10881804 | (E)-1-(2,4-dihydroxyphenyl)-3-(2,2-dimethylchromen-6-yl)prop-2-en-1-one | FASN   |
| 10881804 | (E)-1-(2,4-dihydroxyphenyl)-3-(2,2-dimethylchromen-6-yl)prop-2-en-1-one | FLT3   |
| 10881804 | (E)-1-(2,4-dihydroxyphenyl)-3-(2,2-dimethylchromen-6-yl)prop-2-en-1-one | FNTA   |
| 10881804 | (E)-1-(2,4-dihydroxyphenyl)-3-(2,2-dimethylchromen-6-yl)prop-2-en-1-one | FNTB   |
| 10881804 | (E)-1-(2,4-dihydroxyphenyl)-3-(2,2-dimethylchromen-6-yl)prop-2-en-1-one | GCGR   |
| 10881804 | (E)-1-(2,4-dihydroxyphenyl)-3-(2,2-dimethylchromen-6-yl)prop-2-en-1-one | HDAC1  |
| 10881804 | (E)-1-(2,4-dihydroxyphenyl)-3-(2,2-dimethylchromen-6-yl)prop-2-en-1-one | HDAC10 |

|          |                                                                         |         |
|----------|-------------------------------------------------------------------------|---------|
| 10881804 | (E)-1-(2,4-dihydroxyphenyl)-3-(2,2-dimethylchromen-6-yl)prop-2-en-1-one | HDAC11  |
| 10881804 | (E)-1-(2,4-dihydroxyphenyl)-3-(2,2-dimethylchromen-6-yl)prop-2-en-1-one | HDAC3   |
| 10881804 | (E)-1-(2,4-dihydroxyphenyl)-3-(2,2-dimethylchromen-6-yl)prop-2-en-1-one | HDAC3   |
| 10881804 | (E)-1-(2,4-dihydroxyphenyl)-3-(2,2-dimethylchromen-6-yl)prop-2-en-1-one | HDAC3   |
| 10881804 | (E)-1-(2,4-dihydroxyphenyl)-3-(2,2-dimethylchromen-6-yl)prop-2-en-1-one | HDAC4   |
| 10881804 | (E)-1-(2,4-dihydroxyphenyl)-3-(2,2-dimethylchromen-6-yl)prop-2-en-1-one | HDAC5   |
| 10881804 | (E)-1-(2,4-dihydroxyphenyl)-3-(2,2-dimethylchromen-6-yl)prop-2-en-1-one | HDAC6   |
| 10881804 | (E)-1-(2,4-dihydroxyphenyl)-3-(2,2-dimethylchromen-6-yl)prop-2-en-1-one | HDAC7   |
| 10881804 | (E)-1-(2,4-dihydroxyphenyl)-3-(2,2-dimethylchromen-6-yl)prop-2-en-1-one | HDAC8   |
| 10881804 | (E)-1-(2,4-dihydroxyphenyl)-3-(2,2-dimethylchromen-6-yl)prop-2-en-1-one | HDAC9   |
| 10881804 | (E)-1-(2,4-dihydroxyphenyl)-3-(2,2-dimethylchromen-6-yl)prop-2-en-1-one | HIF1A   |
| 10881804 | (E)-1-(2,4-dihydroxyphenyl)-3-(2,2-dimethylchromen-6-yl)prop-2-en-1-one | HPGD    |
| 10881804 | (E)-1-(2,4-dihydroxyphenyl)-3-(2,2-dimethylchromen-6-yl)prop-2-en-1-one | HPGDS   |
| 10881804 | (E)-1-(2,4-dihydroxyphenyl)-3-(2,2-dimethylchromen-6-yl)prop-2-en-1-one | HSD11B1 |

|          |                                                                         |          |
|----------|-------------------------------------------------------------------------|----------|
| 10881804 | (E)-1-(2,4-dihydroxyphenyl)-3-(2,2-dimethylchromen-6-yl)prop-2-en-1-one | HSD17B3  |
| 10881804 | (E)-1-(2,4-dihydroxyphenyl)-3-(2,2-dimethylchromen-6-yl)prop-2-en-1-one | IKBKE    |
| 10881804 | (E)-1-(2,4-dihydroxyphenyl)-3-(2,2-dimethylchromen-6-yl)prop-2-en-1-one | KIF11    |
| 10881804 | (E)-1-(2,4-dihydroxyphenyl)-3-(2,2-dimethylchromen-6-yl)prop-2-en-1-one | MAOA     |
| 10881804 | (E)-1-(2,4-dihydroxyphenyl)-3-(2,2-dimethylchromen-6-yl)prop-2-en-1-one | MAOB     |
| 10881804 | (E)-1-(2,4-dihydroxyphenyl)-3-(2,2-dimethylchromen-6-yl)prop-2-en-1-one | MAPK14   |
| 10881804 | (E)-1-(2,4-dihydroxyphenyl)-3-(2,2-dimethylchromen-6-yl)prop-2-en-1-one | MAPKAPK2 |
| 10881804 | (E)-1-(2,4-dihydroxyphenyl)-3-(2,2-dimethylchromen-6-yl)prop-2-en-1-one | MAPKAPK5 |
| 10881804 | (E)-1-(2,4-dihydroxyphenyl)-3-(2,2-dimethylchromen-6-yl)prop-2-en-1-one | MELK     |
| 10881804 | (E)-1-(2,4-dihydroxyphenyl)-3-(2,2-dimethylchromen-6-yl)prop-2-en-1-one | MMP1     |
| 10881804 | (E)-1-(2,4-dihydroxyphenyl)-3-(2,2-dimethylchromen-6-yl)prop-2-en-1-one | MMP12    |
| 10881804 | (E)-1-(2,4-dihydroxyphenyl)-3-(2,2-dimethylchromen-6-yl)prop-2-en-1-one | MMP13    |
| 10881804 | (E)-1-(2,4-dihydroxyphenyl)-3-(2,2-dimethylchromen-6-yl)prop-2-en-1-one | MMP14    |
| 10881804 | (E)-1-(2,4-dihydroxyphenyl)-3-(2,2-dimethylchromen-6-yl)prop-2-en-1-one | MMP3     |



|          |                                                                         |         |
|----------|-------------------------------------------------------------------------|---------|
| 10881804 | (E)-1-(2,4-dihydroxyphenyl)-3-(2,2-dimethylchromen-6-yl)prop-2-en-1-one | MMP8    |
| 10881804 | (E)-1-(2,4-dihydroxyphenyl)-3-(2,2-dimethylchromen-6-yl)prop-2-en-1-one | MMP9    |
| 10881804 | (E)-1-(2,4-dihydroxyphenyl)-3-(2,2-dimethylchromen-6-yl)prop-2-en-1-one | MPEG1   |
| 10881804 | (E)-1-(2,4-dihydroxyphenyl)-3-(2,2-dimethylchromen-6-yl)prop-2-en-1-one | NCOR1   |
| 10881804 | (E)-1-(2,4-dihydroxyphenyl)-3-(2,2-dimethylchromen-6-yl)prop-2-en-1-one | NCOR2   |
| 10881804 | (E)-1-(2,4-dihydroxyphenyl)-3-(2,2-dimethylchromen-6-yl)prop-2-en-1-one | NOS2    |
| 10881804 | (E)-1-(2,4-dihydroxyphenyl)-3-(2,2-dimethylchromen-6-yl)prop-2-en-1-one | ODC1    |
| 10881804 | (E)-1-(2,4-dihydroxyphenyl)-3-(2,2-dimethylchromen-6-yl)prop-2-en-1-one | PDE4A   |
| 10881804 | (E)-1-(2,4-dihydroxyphenyl)-3-(2,2-dimethylchromen-6-yl)prop-2-en-1-one | PDE4B   |
| 10881804 | (E)-1-(2,4-dihydroxyphenyl)-3-(2,2-dimethylchromen-6-yl)prop-2-en-1-one | PDE4C   |
| 10881804 | (E)-1-(2,4-dihydroxyphenyl)-3-(2,2-dimethylchromen-6-yl)prop-2-en-1-one | PDE7A   |
| 10881804 | (E)-1-(2,4-dihydroxyphenyl)-3-(2,2-dimethylchromen-6-yl)prop-2-en-1-one | PLA2G1B |
| 10881804 | (E)-1-(2,4-dihydroxyphenyl)-3-(2,2-dimethylchromen-6-yl)prop-2-en-1-one | PLEC    |
| 10881804 | (E)-1-(2,4-dihydroxyphenyl)-3-(2,2-dimethylchromen-6-yl)prop-2-en-1-one | PLK1    |

|          |                                                                         |         |
|----------|-------------------------------------------------------------------------|---------|
| 10881804 | (E)-1-(2,4-dihydroxyphenyl)-3-(2,2-dimethylchromen-6-yl)prop-2-en-1-one | PRKCD   |
| 10881804 | (E)-1-(2,4-dihydroxyphenyl)-3-(2,2-dimethylchromen-6-yl)prop-2-en-1-one | PTAFR   |
| 10881804 | (E)-1-(2,4-dihydroxyphenyl)-3-(2,2-dimethylchromen-6-yl)prop-2-en-1-one | PTGS2   |
| 10881804 | (E)-1-(2,4-dihydroxyphenyl)-3-(2,2-dimethylchromen-6-yl)prop-2-en-1-one | PTPN1   |
| 10881804 | (E)-1-(2,4-dihydroxyphenyl)-3-(2,2-dimethylchromen-6-yl)prop-2-en-1-one | ROCK1   |
| 10881804 | (E)-1-(2,4-dihydroxyphenyl)-3-(2,2-dimethylchromen-6-yl)prop-2-en-1-one | ROCK2   |
| 10881804 | (E)-1-(2,4-dihydroxyphenyl)-3-(2,2-dimethylchromen-6-yl)prop-2-en-1-one | S1PR1   |
| 10881804 | (E)-1-(2,4-dihydroxyphenyl)-3-(2,2-dimethylchromen-6-yl)prop-2-en-1-one | SCD     |
| 10881804 | (E)-1-(2,4-dihydroxyphenyl)-3-(2,2-dimethylchromen-6-yl)prop-2-en-1-one | SF3B3   |
| 10881804 | (E)-1-(2,4-dihydroxyphenyl)-3-(2,2-dimethylchromen-6-yl)prop-2-en-1-one | SIGMAR1 |
| 10881804 | (E)-1-(2,4-dihydroxyphenyl)-3-(2,2-dimethylchromen-6-yl)prop-2-en-1-one | SLC5A1  |
| 10881804 | (E)-1-(2,4-dihydroxyphenyl)-3-(2,2-dimethylchromen-6-yl)prop-2-en-1-one | SLC9A1  |
| 10881804 | (E)-1-(2,4-dihydroxyphenyl)-3-(2,2-dimethylchromen-6-yl)prop-2-en-1-one | SREBF2  |
| 10881804 | (E)-1-(2,4-dihydroxyphenyl)-3-(2,2-dimethylchromen-6-yl)prop-2-en-1-one | SYK     |

|          |                                                                         |        |
|----------|-------------------------------------------------------------------------|--------|
| 10881804 | (E)-1-(2,4-dihydroxyphenyl)-3-(2,2-dimethylchromen-6-yl)prop-2-en-1-one | TAOK1  |
| 10881804 | (E)-1-(2,4-dihydroxyphenyl)-3-(2,2-dimethylchromen-6-yl)prop-2-en-1-one | TAOK3  |
| 10881804 | (E)-1-(2,4-dihydroxyphenyl)-3-(2,2-dimethylchromen-6-yl)prop-2-en-1-one | TBK1   |
| 10881804 | (E)-1-(2,4-dihydroxyphenyl)-3-(2,2-dimethylchromen-6-yl)prop-2-en-1-one | TLR9   |
| 10881804 | (E)-1-(2,4-dihydroxyphenyl)-3-(2,2-dimethylchromen-6-yl)prop-2-en-1-one | TRPV1  |
| 10881804 | (E)-1-(2,4-dihydroxyphenyl)-3-(2,2-dimethylchromen-6-yl)prop-2-en-1-one | TYR    |
| 10881804 | (E)-1-(2,4-dihydroxyphenyl)-3-(2,2-dimethylchromen-6-yl)prop-2-en-1-one | VCP    |
| 114829   | DFV                                                                     | ABCC1  |
| 114829   | DFV                                                                     | ABCG2  |
| 114829   | DFV                                                                     | ACHE   |
| 114829   | DFV                                                                     | ADORA1 |
| 114829   | DFV                                                                     | ADORA3 |
| 114829   | DFV                                                                     | AKR1B1 |
| 114829   | DFV                                                                     | AKR1C3 |
| 114829   | DFV                                                                     | ALOX12 |
| 114829   | DFV                                                                     | AURKA  |
| 114829   | DFV                                                                     | BACE1  |
| 114829   | DFV                                                                     | BCHE   |
| 114829   | DFV                                                                     | BCL2L1 |
| 114829   | DFV                                                                     | CA1    |
| 114829   | DFV                                                                     | CA12   |
| 114829   | DFV                                                                     | CA13   |
| 114829   | DFV                                                                     | CA2    |
| 114829   | DFV                                                                     | CA3    |
| 114829   | DFV                                                                     | CA4    |
| 114829   | DFV                                                                     | CA5A   |
| 114829   | DFV                                                                     | CA5B   |
| 114829   | DFV                                                                     | CA6    |
| 114829   | DFV                                                                     | CA7    |
| 114829   | DFV                                                                     | CA9    |

|        |     |          |
|--------|-----|----------|
| 114829 | DFV | CALM1    |
| 114829 | DFV | CBR1     |
| 114829 | DFV | CCNE1    |
| 114829 | DFV | CCNE1    |
| 114829 | DFV | CDK2     |
| 114829 | DFV | CDK3     |
| 114829 | DFV | CES1     |
| 114829 | DFV | CES2     |
| 114829 | DFV | CHRNA7   |
| 114829 | DFV | CLK1     |
| 114829 | DFV | CYP19A1  |
| 114829 | DFV | CYP1B1   |
| 114829 | DFV | CYP2C9   |
| 114829 | DFV | CYP3A4   |
| 114829 | DFV | DNM1     |
| 114829 | DFV | DUSP3    |
| 114829 | DFV | DYRK1A   |
| 114829 | DFV | DYRK1B   |
| 114829 | DFV | EDNRA    |
| 114829 | DFV | ERN1     |
| 114829 | DFV | ESR1     |
| 114829 | DFV | ESR2     |
| 114829 | DFV | ESRRA    |
| 114829 | DFV | ESRRB    |
| 114829 | DFV | F3       |
| 114829 | DFV | FGFR1    |
| 114829 | DFV | GCGR     |
| 114829 | DFV | GRM2     |
| 114829 | DFV | GRM5     |
| 114829 | DFV | GSK3B    |
| 114829 | DFV | HDAC5    |
| 114829 | DFV | HDAC7    |
| 114829 | DFV | HDAC9    |
| 114829 | DFV | HNF4A    |
| 114829 | DFV | HSD17B1  |
| 114829 | DFV | HSD17B14 |
| 114829 | DFV | HSD17B2  |
| 114829 | DFV | IGF1R    |
| 114829 | DFV | INSR     |
| 114829 | DFV | KDR      |
| 114829 | DFV | KIT      |
| 114829 | DFV | KLK1     |
| 114829 | DFV | KLK2     |
| 114829 | DFV | MAOB     |

|          |             |          |
|----------|-------------|----------|
| 114829   | DFV         | MET      |
| 114829   | DFV         | MMP12    |
| 114829   | DFV         | MMP13    |
| 114829   | DFV         | MMP2     |
| 114829   | DFV         | MMP3     |
| 114829   | DFV         | MMP9     |
| 114829   | DFV         | NOX4     |
| 114829   | DFV         | NQO2     |
| 114829   | DFV         | PDPK1    |
| 114829   | DFV         | PGF      |
| 114829   | DFV         | PIK3CA   |
| 114829   | DFV         | PIK3CB   |
| 114829   | DFV         | PLA2G10  |
| 114829   | DFV         | PLA2G1B  |
| 114829   | DFV         | PLA2G2A  |
| 114829   | DFV         | PLA2G5   |
| 114829   | DFV         | POLB     |
| 114829   | DFV         | PPARG    |
| 114829   | DFV         | PTGER1   |
| 114829   | DFV         | PTGER2   |
| 114829   | DFV         | PTGER3   |
| 114829   | DFV         | PTGER4   |
| 114829   | DFV         | PTGS1    |
| 114829   | DFV         | PTPN1    |
| 114829   | DFV         | RPS6KA5  |
| 114829   | DFV         | RXRA     |
| 114829   | DFV         | SERPINE1 |
| 114829   | DFV         | SHBG     |
| 114829   | DFV         | SLC5A2   |
| 114829   | DFV         | SRC      |
| 114829   | DFV         | TAS2R31  |
| 114829   | DFV         | VCP      |
| 114829   | DFV         | VEGFA    |
| 114829   | DFV         | WEE1     |
| 114829   | DFV         | YWHAG    |
| 15380912 | konzonols W | ACVR1    |
| 15380912 | konzonols W | ADAM17   |
| 15380912 | konzonols W | ADAMTS4  |
| 15380912 | konzonols W | ADAMTS5  |
| 15380912 | konzonols W | ADORA2B  |
| 15380912 | konzonols W | AGPAT2   |
| 15380912 | konzonols W | AKR1B10  |
| 15380912 | konzonols W | ALDH2    |
| 15380912 | konzonols W | ALOX5    |

|          |            |         |
|----------|------------|---------|
| 15380912 | kazonols W | APP     |
| 15380912 | kazonols W | AR      |
| 15380912 | kazonols W | AURKA   |
| 15380912 | kazonols W | AURKB   |
| 15380912 | kazonols W | BMP1    |
| 15380912 | kazonols W | BMP4    |
| 15380912 | kazonols W | BRAF    |
| 15380912 | kazonols W | CA1     |
| 15380912 | kazonols W | CA12    |
| 15380912 | kazonols W | CA13    |
| 15380912 | kazonols W | CA7     |
| 15380912 | kazonols W | CA9     |
| 15380912 | kazonols W | CCNB1   |
| 15380912 | kazonols W | CCNB2   |
| 15380912 | kazonols W | CCNB3   |
| 15380912 | kazonols W | CDC25A  |
| 15380912 | kazonols W | CDC25B  |
| 15380912 | kazonols W | CDK1    |
| 15380912 | kazonols W | CDK2    |
| 15380912 | kazonols W | CDK5    |
| 15380912 | kazonols W | CDK5R1  |
| 15380912 | kazonols W | CES1    |
| 15380912 | kazonols W | CES2    |
| 15380912 | kazonols W | CHEK1   |
| 15380912 | kazonols W | CHRNA7  |
| 15380912 | kazonols W | COMT    |
| 15380912 | kazonols W | CTSL    |
| 15380912 | kazonols W | CYP11B1 |
| 15380912 | kazonols W | CYP11B2 |
| 15380912 | kazonols W | CYP1A2  |
| 15380912 | kazonols W | CYP1B1  |
| 15380912 | kazonols W | DPP4    |
| 15380912 | kazonols W | ELANE   |
| 15380912 | kazonols W | EP300   |
| 15380912 | kazonols W | EPHX2   |
| 15380912 | kazonols W | ERN1    |
| 15380912 | kazonols W | FLT3    |
| 15380912 | kazonols W | GCGR    |
| 15380912 | kazonols W | GRIN1   |
| 15380912 | kazonols W | GRIN2B  |
| 15380912 | kazonols W | GRK6    |
| 15380912 | kazonols W | GSK3A   |
| 15380912 | kazonols W | GSK3B   |
| 15380912 | kazonols W | HDAC1   |

|          |            |          |
|----------|------------|----------|
| 15380912 | kazonols W | HDAC2    |
| 15380912 | kazonols W | HDAC3    |
| 15380912 | kazonols W | HDAC6    |
| 15380912 | kazonols W | HDAC8    |
| 15380912 | kazonols W | HIF1A    |
| 15380912 | kazonols W | HPGD     |
| 15380912 | kazonols W | HPGDS    |
| 15380912 | kazonols W | HSD11B1  |
| 15380912 | kazonols W | HSP90AA1 |
| 15380912 | kazonols W | HTR3A    |
| 15380912 | kazonols W | IKBKE    |
| 15380912 | kazonols W | KAT2A    |
| 15380912 | kazonols W | KAT2B    |
| 15380912 | kazonols W | KDR      |
| 15380912 | kazonols W | MAOB     |
| 15380912 | kazonols W | MAPK1    |
| 15380912 | kazonols W | MAPT     |
| 15380912 | kazonols W | MCHR1    |
| 15380912 | kazonols W | MCL1     |
| 15380912 | kazonols W | MET      |
| 15380912 | kazonols W | METAP1   |
| 15380912 | kazonols W | MMP1     |
| 15380912 | kazonols W | MMP12    |
| 15380912 | kazonols W | MMP13    |
| 15380912 | kazonols W | MMP14    |
| 15380912 | kazonols W | MMP2     |
| 15380912 | kazonols W | MMP3     |
| 15380912 | kazonols W | MMP7     |
| 15380912 | kazonols W | MMP8     |
| 15380912 | kazonols W | MMP9     |
| 15380912 | kazonols W | MPEG1    |
| 15380912 | kazonols W | ODC1     |
| 15380912 | kazonols W | PARP1    |
| 15380912 | kazonols W | PDE4D    |
| 15380912 | kazonols W | PDK1     |
| 15380912 | kazonols W | PPARG    |
| 15380912 | kazonols W | PTK6     |
| 15380912 | kazonols W | PTPN1    |
| 15380912 | kazonols W | RAF1     |
| 15380912 | kazonols W | ROCK2    |
| 15380912 | kazonols W | S1PR1    |
| 15380912 | kazonols W | S1PR3    |
| 15380912 | kazonols W | SCD      |
| 15380912 | kazonols W | SNCA     |

|          |                                                                                                     |         |
|----------|-----------------------------------------------------------------------------------------------------|---------|
| 15380912 | kanzonols W                                                                                         | SRC     |
| 15380912 | kanzonols W                                                                                         | SREBF2  |
| 15380912 | kanzonols W                                                                                         | TAS2R31 |
| 15380912 | kanzonols W                                                                                         | TBK1    |
| 15380912 | kanzonols W                                                                                         | TBXA2R  |
| 15380912 | kanzonols W                                                                                         | TGFBR1  |
| 15380912 | kanzonols W                                                                                         | TNNT2   |
| 15380912 | kanzonols W                                                                                         | TRPV1   |
| 637112   | (2S)-6-(2,4-dihydroxyphenyl)-2-(2-hydroxypropan-2-yl)-4-methoxy-2,3-dihydrofuro[3,2-g]chromen-7-one | ABHD6   |
| 637112   | (2S)-6-(2,4-dihydroxyphenyl)-2-(2-hydroxypropan-2-yl)-4-methoxy-2,3-dihydrofuro[3,2-g]chromen-7-one | AURKA   |
| 637112   | (2S)-6-(2,4-dihydroxyphenyl)-2-(2-hydroxypropan-2-yl)-4-methoxy-2,3-dihydrofuro[3,2-g]chromen-7-one | BACE2   |
| 637112   | (2S)-6-(2,4-dihydroxyphenyl)-2-(2-hydroxypropan-2-yl)-4-methoxy-2,3-dihydrofuro[3,2-g]chromen-7-one | CCNB1   |
| 637112   | (2S)-6-(2,4-dihydroxyphenyl)-2-(2-hydroxypropan-2-yl)-4-methoxy-2,3-dihydrofuro[3,2-g]chromen-7-one | CCNE1   |
| 637112   | (2S)-6-(2,4-dihydroxyphenyl)-2-(2-hydroxypropan-2-yl)-4-methoxy-2,3-dihydrofuro[3,2-g]chromen-7-one | CDK1    |
| 637112   | (2S)-6-(2,4-dihydroxyphenyl)-2-(2-hydroxypropan-2-yl)-4-methoxy-2,3-dihydrofuro[3,2-g]chromen-7-one | CDK2    |
| 637112   | (2S)-6-(2,4-dihydroxyphenyl)-2-(2-hydroxypropan-2-yl)-4-methoxy-2,3-dihydrofuro[3,2-g]chromen-7-one | CHEK1   |
| 637112   | (2S)-6-(2,4-dihydroxyphenyl)-2-(2-hydroxypropan-2-yl)-4-methoxy-2,3-dihydrofuro[3,2-g]chromen-7-one | CSF1R   |



|        |                                                                                                     |       |
|--------|-----------------------------------------------------------------------------------------------------|-------|
| 637112 | (2S)-6-(2,4-dihydroxyphenyl)-2-(2-hydroxypropan-2-yl)-4-methoxy-2,3-dihydrofuro[3,2-g]chromen-7-one | F2    |
| 637112 | (2S)-6-(2,4-dihydroxyphenyl)-2-(2-hydroxypropan-2-yl)-4-methoxy-2,3-dihydrofuro[3,2-g]chromen-7-one | FAAH  |
| 637112 | (2S)-6-(2,4-dihydroxyphenyl)-2-(2-hydroxypropan-2-yl)-4-methoxy-2,3-dihydrofuro[3,2-g]chromen-7-one | GRM5  |
| 637112 | (2S)-6-(2,4-dihydroxyphenyl)-2-(2-hydroxypropan-2-yl)-4-methoxy-2,3-dihydrofuro[3,2-g]chromen-7-one | HIF1A |
| 637112 | (2S)-6-(2,4-dihydroxyphenyl)-2-(2-hydroxypropan-2-yl)-4-methoxy-2,3-dihydrofuro[3,2-g]chromen-7-one | KCNH2 |
| 637112 | (2S)-6-(2,4-dihydroxyphenyl)-2-(2-hydroxypropan-2-yl)-4-methoxy-2,3-dihydrofuro[3,2-g]chromen-7-one | KDR   |
| 637112 | (2S)-6-(2,4-dihydroxyphenyl)-2-(2-hydroxypropan-2-yl)-4-methoxy-2,3-dihydrofuro[3,2-g]chromen-7-one | MET   |
| 637112 | (2S)-6-(2,4-dihydroxyphenyl)-2-(2-hydroxypropan-2-yl)-4-methoxy-2,3-dihydrofuro[3,2-g]chromen-7-one | MGLL  |
| 637112 | (2S)-6-(2,4-dihydroxyphenyl)-2-(2-hydroxypropan-2-yl)-4-methoxy-2,3-dihydrofuro[3,2-g]chromen-7-one | MMP1  |
| 637112 | (2S)-6-(2,4-dihydroxyphenyl)-2-(2-hydroxypropan-2-yl)-4-methoxy-2,3-dihydrofuro[3,2-g]chromen-7-one | MMP13 |
| 637112 | (2S)-6-(2,4-dihydroxyphenyl)-2-(2-hydroxypropan-2-yl)-4-methoxy-2,3-dihydrofuro[3,2-g]chromen-7-one | MMP2  |

|         |                                                                                                     |          |
|---------|-----------------------------------------------------------------------------------------------------|----------|
| 637112  | (2S)-6-(2,4-dihydroxyphenyl)-2-(2-hydroxypropan-2-yl)-4-methoxy-2,3-dihydrofuro[3,2-g]chromen-7-one | MMP9     |
| 637112  | (2S)-6-(2,4-dihydroxyphenyl)-2-(2-hydroxypropan-2-yl)-4-methoxy-2,3-dihydrofuro[3,2-g]chromen-7-one | NR3C1    |
| 637112  | (2S)-6-(2,4-dihydroxyphenyl)-2-(2-hydroxypropan-2-yl)-4-methoxy-2,3-dihydrofuro[3,2-g]chromen-7-one | RPS6KB1  |
| 637112  | (2S)-6-(2,4-dihydroxyphenyl)-2-(2-hydroxypropan-2-yl)-4-methoxy-2,3-dihydrofuro[3,2-g]chromen-7-one | SCN9A    |
| 637112  | (2S)-6-(2,4-dihydroxyphenyl)-2-(2-hydroxypropan-2-yl)-4-methoxy-2,3-dihydrofuro[3,2-g]chromen-7-one | SLC5A1   |
| 637112  | (2S)-6-(2,4-dihydroxyphenyl)-2-(2-hydroxypropan-2-yl)-4-methoxy-2,3-dihydrofuro[3,2-g]chromen-7-one | SOAT1    |
| 637112  | (2S)-6-(2,4-dihydroxyphenyl)-2-(2-hydroxypropan-2-yl)-4-methoxy-2,3-dihydrofuro[3,2-g]chromen-7-one | SOAT2    |
| 637112  | (2S)-6-(2,4-dihydroxyphenyl)-2-(2-hydroxypropan-2-yl)-4-methoxy-2,3-dihydrofuro[3,2-g]chromen-7-one | TYMS     |
| 5481948 | Semilicoisoflavone B                                                                                | ADRB1    |
| 5481948 | Semilicoisoflavone B                                                                                | ADRB1    |
| 5481948 | Semilicoisoflavone B                                                                                | ADRB2    |
| 5481948 | Semilicoisoflavone B                                                                                | ADRB2    |
| 5481948 | Semilicoisoflavone B                                                                                | CA7      |
| 5481948 | Semilicoisoflavone B                                                                                | CYP19A1  |
| 5481948 | Semilicoisoflavone B                                                                                | CYP19A1  |
| 5481948 | Semilicoisoflavone B                                                                                | GCCR     |
| 5481948 | Semilicoisoflavone B                                                                                | HSP90AA1 |
| 5481948 | Semilicoisoflavone B                                                                                | HSP90AB1 |
| 5481948 | Semilicoisoflavone B                                                                                | PTPN1    |
| 5481948 | Semilicoisoflavone B                                                                                | PTPN1    |

|         |                      |         |
|---------|----------------------|---------|
| 5481948 | Semilicoisoflavone B | RARA    |
| 5281619 | Glepidotin A         | ABCB1   |
| 5281619 | Glepidotin A         | ABCC1   |
| 5281619 | Glepidotin A         | ABCG2   |
| 5281619 | Glepidotin A         | ACHE    |
| 5281619 | Glepidotin A         | ADORA1  |
| 5281619 | Glepidotin A         | ADORA2A |
| 5281619 | Glepidotin A         | AHR     |
| 5281619 | Glepidotin A         | AKR1B1  |
| 5281619 | Glepidotin A         | AKR1C1  |
| 5281619 | Glepidotin A         | AKR1C2  |
| 5281619 | Glepidotin A         | AKR1C3  |
| 5281619 | Glepidotin A         | AKR1C4  |
| 5281619 | Glepidotin A         | AKT1    |
| 5281619 | Glepidotin A         | ALK     |
| 5281619 | Glepidotin A         | ALOX12  |
| 5281619 | Glepidotin A         | ALOX15  |
| 5281619 | Glepidotin A         | ALOX5   |
| 5281619 | Glepidotin A         | ALPL    |
| 5281619 | Glepidotin A         | APEX1   |
| 5281619 | Glepidotin A         | ARG1    |
| 5281619 | Glepidotin A         | AVPR2   |
| 5281619 | Glepidotin A         | BACE1   |
| 5281619 | Glepidotin A         | BCHE    |
| 5281619 | Glepidotin A         | BCL2    |
| 5281619 | Glepidotin A         | CA1     |
| 5281619 | Glepidotin A         | CA12    |
| 5281619 | Glepidotin A         | CA13    |
| 5281619 | Glepidotin A         | CA2     |
| 5281619 | Glepidotin A         | CA3     |
| 5281619 | Glepidotin A         | CA4     |
| 5281619 | Glepidotin A         | CA5A    |
| 5281619 | Glepidotin A         | CA7     |
| 5281619 | Glepidotin A         | CA9     |
| 5281619 | Glepidotin A         | CBR1    |
| 5281619 | Glepidotin A         | CCND1   |
| 5281619 | Glepidotin A         | CDK1    |
| 5281619 | Glepidotin A         | CDK2    |
| 5281619 | Glepidotin A         | CDK4    |
| 5281619 | Glepidotin A         | CFTR    |
| 5281619 | Glepidotin A         | CNR2    |
| 5281619 | Glepidotin A         | CSNK2A1 |
| 5281619 | Glepidotin A         | CXCR1   |
| 5281619 | Glepidotin A         | CYP19A1 |

|         |              |          |
|---------|--------------|----------|
| 5281619 | Glepidotin A | CYP1B1   |
| 5281619 | Glepidotin A | DAPK1    |
| 5281619 | Glepidotin A | DHFR     |
| 5281619 | Glepidotin A | DRD4     |
| 5281619 | Glepidotin A | EGFR     |
| 5281619 | Glepidotin A | EGLN1    |
| 5281619 | Glepidotin A | EP300    |
| 5281619 | Glepidotin A | ERBB2    |
| 5281619 | Glepidotin A | ESR1     |
| 5281619 | Glepidotin A | ESR2     |
| 5281619 | Glepidotin A | ESRRA    |
| 5281619 | Glepidotin A | F2       |
| 5281619 | Glepidotin A | GABRA1   |
| 5281619 | Glepidotin A | GABRA3   |
| 5281619 | Glepidotin A | GABRB3   |
| 5281619 | Glepidotin A | GABRB3   |
| 5281619 | Glepidotin A | GABRG2   |
| 5281619 | Glepidotin A | GABRG2   |
| 5281619 | Glepidotin A | GCGR     |
| 5281619 | Glepidotin A | GPR35    |
| 5281619 | Glepidotin A | GPR84    |
| 5281619 | Glepidotin A | GSK3B    |
| 5281619 | Glepidotin A | HSD17B1  |
| 5281619 | Glepidotin A | HSD17B2  |
| 5281619 | Glepidotin A | HSP90AA1 |
| 5281619 | Glepidotin A | HSP90AB1 |
| 5281619 | Glepidotin A | HSP90B1  |
| 5281619 | Glepidotin A | KDM4E    |
| 5281619 | Glepidotin A | MAOA     |
| 5281619 | Glepidotin A | MAPT     |
| 5281619 | Glepidotin A | MCL1     |
| 5281619 | Glepidotin A | MMP13    |
| 5281619 | Glepidotin A | MMP2     |
| 5281619 | Glepidotin A | MMP3     |
| 5281619 | Glepidotin A | MMP9     |
| 5281619 | Glepidotin A | MPG      |
| 5281619 | Glepidotin A | MPO      |
| 5281619 | Glepidotin A | MYLK     |
| 5281619 | Glepidotin A | NAE1     |
| 5281619 | Glepidotin A | NEK2     |
| 5281619 | Glepidotin A | NEK6     |
| 5281619 | Glepidotin A | NOX4     |
| 5281619 | Glepidotin A | PDE10A   |
| 5281619 | Glepidotin A | PDE5A    |

|         |                    |         |
|---------|--------------------|---------|
| 5281619 | Glepidotin A       | PDK1    |
| 5281619 | Glepidotin A       | PFKFB3  |
| 5281619 | Glepidotin A       | PIK3R1  |
| 5281619 | Glepidotin A       | PLA2G1B |
| 5281619 | Glepidotin A       | PLAU    |
| 5281619 | Glepidotin A       | PLK1    |
| 5281619 | Glepidotin A       | PTAFR   |
| 5281619 | Glepidotin A       | PTGS2   |
| 5281619 | Glepidotin A       | PTPN1   |
| 5281619 | Glepidotin A       | PTPRS   |
| 5281619 | Glepidotin A       | PYGL    |
| 5281619 | Glepidotin A       | SYK     |
| 5281619 | Glepidotin A       | TOP2A   |
| 5281619 | Glepidotin A       | TYR     |
| 5281619 | Glepidotin A       | XDH     |
| 162412  | Phaseolinisoflavan | ABL1    |
| 162412  | Phaseolinisoflavan | ADORA1  |
| 162412  | Phaseolinisoflavan | ADORA2A |
| 162412  | Phaseolinisoflavan | ADORA2B |
| 162412  | Phaseolinisoflavan | ALDH2   |
| 162412  | Phaseolinisoflavan | ALK     |
| 162412  | Phaseolinisoflavan | ALPL    |
| 162412  | Phaseolinisoflavan | AR      |
| 162412  | Phaseolinisoflavan | AURKA   |
| 162412  | Phaseolinisoflavan | BLK     |
| 162412  | Phaseolinisoflavan | CA13    |
| 162412  | Phaseolinisoflavan | CA7     |
| 162412  | Phaseolinisoflavan | CASK    |
| 162412  | Phaseolinisoflavan | CCNB1   |
| 162412  | Phaseolinisoflavan | CCNB2   |
| 162412  | Phaseolinisoflavan | CCNB3   |
| 162412  | Phaseolinisoflavan | CCND1   |
| 162412  | Phaseolinisoflavan | CCND2   |
| 162412  | Phaseolinisoflavan | CCND3   |
| 162412  | Phaseolinisoflavan | CCR4    |
| 162412  | Phaseolinisoflavan | CDK1    |
| 162412  | Phaseolinisoflavan | CDK4    |
| 162412  | Phaseolinisoflavan | CDK5    |
| 162412  | Phaseolinisoflavan | CDK5R1  |
| 162412  | Phaseolinisoflavan | CDK7    |
| 162412  | Phaseolinisoflavan | CHEK1   |
| 162412  | Phaseolinisoflavan | CHEK2   |
| 162412  | Phaseolinisoflavan | CSF1R   |
| 162412  | Phaseolinisoflavan | CSK     |

|        |                    |         |
|--------|--------------------|---------|
| 162412 | Phaseolinisoflavan | CSNK1A1 |
| 162412 | Phaseolinisoflavan | CSNK1D  |
| 162412 | Phaseolinisoflavan | CSNK1G1 |
| 162412 | Phaseolinisoflavan | CSNK1G2 |
| 162412 | Phaseolinisoflavan | DAPK1   |
| 162412 | Phaseolinisoflavan | DAPK2   |
| 162412 | Phaseolinisoflavan | DAPK3   |
| 162412 | Phaseolinisoflavan | DRD4    |
| 162412 | Phaseolinisoflavan | DSTYK   |
| 162412 | Phaseolinisoflavan | EGFR    |
| 162412 | Phaseolinisoflavan | ELANE   |
| 162412 | Phaseolinisoflavan | EP300   |
| 162412 | Phaseolinisoflavan | EPHA2   |
| 162412 | Phaseolinisoflavan | ERBB2   |
| 162412 | Phaseolinisoflavan | ERN1    |
| 162412 | Phaseolinisoflavan | ESR1    |
| 162412 | Phaseolinisoflavan | ESR1    |
| 162412 | Phaseolinisoflavan | ESR2    |
| 162412 | Phaseolinisoflavan | ESR2    |
| 162412 | Phaseolinisoflavan | FGFR1   |
| 162412 | Phaseolinisoflavan | FGFR3   |
| 162412 | Phaseolinisoflavan | FLT1    |
| 162412 | Phaseolinisoflavan | FLT3    |
| 162412 | Phaseolinisoflavan | FLT4    |
| 162412 | Phaseolinisoflavan | FNTA    |
| 162412 | Phaseolinisoflavan | FNTB    |
| 162412 | Phaseolinisoflavan | FYN     |
| 162412 | Phaseolinisoflavan | GABRA1  |
| 162412 | Phaseolinisoflavan | GABRA3  |
| 162412 | Phaseolinisoflavan | GABRA5  |
| 162412 | Phaseolinisoflavan | GABRA6  |
| 162412 | Phaseolinisoflavan | GABRB3  |
| 162412 | Phaseolinisoflavan | GABRB3  |
| 162412 | Phaseolinisoflavan | GABRB3  |
| 162412 | Phaseolinisoflavan | GABRB3  |
| 162412 | Phaseolinisoflavan | GABRB3  |
| 162412 | Phaseolinisoflavan | GABRG2  |
| 162412 | Phaseolinisoflavan | GABRG2  |
| 162412 | Phaseolinisoflavan | GABRG2  |
| 162412 | Phaseolinisoflavan | GABRG2  |
| 162412 | Phaseolinisoflavan | GCCR    |
| 162412 | Phaseolinisoflavan | GPR84   |
| 162412 | Phaseolinisoflavan | GRK7    |
| 162412 | Phaseolinisoflavan | GRM4    |
| 162412 | Phaseolinisoflavan | GSK3A   |

|        |                    |          |
|--------|--------------------|----------|
| 162412 | Phaseolinisoflavan | HIPK4    |
| 162412 | Phaseolinisoflavan | HSD17B1  |
| 162412 | Phaseolinisoflavan | HSD17B2  |
| 162412 | Phaseolinisoflavan | HSD17B3  |
| 162412 | Phaseolinisoflavan | HSP90AA1 |
| 162412 | Phaseolinisoflavan | HSP90AB1 |
| 162412 | Phaseolinisoflavan | HSP90B1  |
| 162412 | Phaseolinisoflavan | JAK1     |
| 162412 | Phaseolinisoflavan | JAK2     |
| 162412 | Phaseolinisoflavan | JAK3     |
| 162412 | Phaseolinisoflavan | KDM1A    |
| 162412 | Phaseolinisoflavan | KDR      |
| 162412 | Phaseolinisoflavan | KIT      |
| 162412 | Phaseolinisoflavan | LCK      |
| 162412 | Phaseolinisoflavan | LNPEP    |
| 162412 | Phaseolinisoflavan | LRRK2    |
| 162412 | Phaseolinisoflavan | LTA4H    |
| 162412 | Phaseolinisoflavan | MAP2K2   |
| 162412 | Phaseolinisoflavan | MAP2K3   |
| 162412 | Phaseolinisoflavan | MAP2K4   |
| 162412 | Phaseolinisoflavan | MAP3K9   |
| 162412 | Phaseolinisoflavan | MAPK14   |
| 162412 | Phaseolinisoflavan | MET      |
| 162412 | Phaseolinisoflavan | MMP1     |
| 162412 | Phaseolinisoflavan | MTOR     |
| 162412 | Phaseolinisoflavan | MYLK     |
| 162412 | Phaseolinisoflavan | NTRK1    |
| 162412 | Phaseolinisoflavan | PDE10A   |
| 162412 | Phaseolinisoflavan | PDE5A    |
| 162412 | Phaseolinisoflavan | PDE5A    |
| 162412 | Phaseolinisoflavan | PDGFRA   |
| 162412 | Phaseolinisoflavan | PDGFRB   |
| 162412 | Phaseolinisoflavan | PHKG2    |
| 162412 | Phaseolinisoflavan | PIK3C2G  |
| 162412 | Phaseolinisoflavan | PIK3CB   |
| 162412 | Phaseolinisoflavan | PIK3CD   |
| 162412 | Phaseolinisoflavan | PIM1     |
| 162412 | Phaseolinisoflavan | PIP4K2C  |
| 162412 | Phaseolinisoflavan | PIP5K1C  |
| 162412 | Phaseolinisoflavan | PLK1     |
| 162412 | Phaseolinisoflavan | PRKDC    |
| 162412 | Phaseolinisoflavan | PRKG2    |
| 162412 | Phaseolinisoflavan | PTPN1    |
| 162412 | Phaseolinisoflavan | PTPN1    |

|         |                    |         |
|---------|--------------------|---------|
| 162412  | Phaseolinisoflavan | RELA    |
| 162412  | Phaseolinisoflavan | RET     |
| 162412  | Phaseolinisoflavan | RORC    |
| 162412  | Phaseolinisoflavan | RPS6KA1 |
| 162412  | Phaseolinisoflavan | RPS6KA2 |
| 162412  | Phaseolinisoflavan | RPS6KA3 |
| 162412  | Phaseolinisoflavan | RPS6KA4 |
| 162412  | Phaseolinisoflavan | SRC     |
| 162412  | Phaseolinisoflavan | SRD5A1  |
| 162412  | Phaseolinisoflavan | SYK     |
| 162412  | Phaseolinisoflavan | TAOK2   |
| 162412  | Phaseolinisoflavan | TLR9    |
| 162412  | Phaseolinisoflavan | TRPM8   |
| 162412  | Phaseolinisoflavan | VCP     |
| 162412  | Phaseolinisoflavan | WEE1    |
| 162412  | Phaseolinisoflavan | XPO1    |
| 162412  | Phaseolinisoflavan | YES1    |
| 5317768 | Glypallichalcone   | ABCB1   |
| 5317768 | Glypallichalcone   | ABCG2   |
| 5317768 | Glypallichalcone   | ACHE    |
| 5317768 | Glypallichalcone   | ADAM10  |
| 5317768 | Glypallichalcone   | ADAM17  |
| 5317768 | Glypallichalcone   | ADAM9   |
| 5317768 | Glypallichalcone   | AKR1B1  |
| 5317768 | Glypallichalcone   | ALDH2   |
| 5317768 | Glypallichalcone   | ALOX15  |
| 5317768 | Glypallichalcone   | ALOX5   |
| 5317768 | Glypallichalcone   | APP     |
| 5317768 | Glypallichalcone   | BACE1   |
| 5317768 | Glypallichalcone   | BCHE    |
| 5317768 | Glypallichalcone   | BMP1    |
| 5317768 | Glypallichalcone   | BRAF    |
| 5317768 | Glypallichalcone   | CCNA1   |
| 5317768 | Glypallichalcone   | CCNA2   |
| 5317768 | Glypallichalcone   | CCNC    |
| 5317768 | Glypallichalcone   | CCND1   |
| 5317768 | Glypallichalcone   | CCNE1   |
| 5317768 | Glypallichalcone   | CCNE2   |
| 5317768 | Glypallichalcone   | CDC25A  |
| 5317768 | Glypallichalcone   | CDC25B  |
| 5317768 | Glypallichalcone   | CDK2    |
| 5317768 | Glypallichalcone   | CDK2    |
| 5317768 | Glypallichalcone   | CDK2    |
| 5317768 | Glypallichalcone   | CDK4    |



|         |                  |         |
|---------|------------------|---------|
| 5317768 | Glypallichalcone | CDK8    |
| 5317768 | Glypallichalcone | CDK8    |
| 5317768 | Glypallichalcone | CHEK1   |
| 5317768 | Glypallichalcone | CHRNA7  |
| 5317768 | Glypallichalcone | CTSS    |
| 5317768 | Glypallichalcone | CXCR4   |
| 5317768 | Glypallichalcone | CYP19A1 |
| 5317768 | Glypallichalcone | DUSP3   |
| 5317768 | Glypallichalcone | EDNRA   |
| 5317768 | Glypallichalcone | EGFR    |
| 5317768 | Glypallichalcone | EZR     |
| 5317768 | Glypallichalcone | F3      |
| 5317768 | Glypallichalcone | FCER2   |
| 5317768 | Glypallichalcone | GRIA1   |
| 5317768 | Glypallichalcone | GSK3A   |
| 5317768 | Glypallichalcone | GSTM2   |
| 5317768 | Glypallichalcone | GSTP1   |
| 5317768 | Glypallichalcone | HDAC1   |
| 5317768 | Glypallichalcone | HDAC3   |
| 5317768 | Glypallichalcone | HDAC5   |
| 5317768 | Glypallichalcone | HDAC6   |
| 5317768 | Glypallichalcone | HDAC7   |
| 5317768 | Glypallichalcone | HDAC8   |
| 5317768 | Glypallichalcone | HDAC9   |
| 5317768 | Glypallichalcone | HPGDS   |
| 5317768 | Glypallichalcone | HTR1A   |
| 5317768 | Glypallichalcone | KCNA3   |
| 5317768 | Glypallichalcone | KIT     |
| 5317768 | Glypallichalcone | LNPEP   |
| 5317768 | Glypallichalcone | MAOA    |
| 5317768 | Glypallichalcone | MAOB    |
| 5317768 | Glypallichalcone | MAP2K1  |
| 5317768 | Glypallichalcone | MAPK14  |
| 5317768 | Glypallichalcone | MELK    |
| 5317768 | Glypallichalcone | MIF     |
| 5317768 | Glypallichalcone | MMP1    |
| 5317768 | Glypallichalcone | MMP12   |
| 5317768 | Glypallichalcone | MMP13   |
| 5317768 | Glypallichalcone | MMP14   |
| 5317768 | Glypallichalcone | MMP16   |
| 5317768 | Glypallichalcone | MMP2    |
| 5317768 | Glypallichalcone | MMP25   |
| 5317768 | Glypallichalcone | MMP3    |
| 5317768 | Glypallichalcone | MMP7    |

|          |                                                           |        |
|----------|-----------------------------------------------------------|--------|
| 5317768  | Glypallichalcone                                          | MMP8   |
| 5317768  | Glypallichalcone                                          | MMP9   |
| 5317768  | Glypallichalcone                                          | MPEG1  |
| 5317768  | Glypallichalcone                                          | NOS2   |
| 5317768  | Glypallichalcone                                          | NOX4   |
| 5317768  | Glypallichalcone                                          | NR1D1  |
| 5317768  | Glypallichalcone                                          | PDE4A  |
| 5317768  | Glypallichalcone                                          | PDE4B  |
| 5317768  | Glypallichalcone                                          | PDE4C  |
| 5317768  | Glypallichalcone                                          | PDE4D  |
| 5317768  | Glypallichalcone                                          | PDK1   |
| 5317768  | Glypallichalcone                                          | PDPK1  |
| 5317768  | Glypallichalcone                                          | PFKFB3 |
| 5317768  | Glypallichalcone                                          | PIK3CA |
| 5317768  | Glypallichalcone                                          | PIK3CB |
| 5317768  | Glypallichalcone                                          | PIK3CD |
| 5317768  | Glypallichalcone                                          | PIK3R1 |
| 5317768  | Glypallichalcone                                          | PIM1   |
| 5317768  | Glypallichalcone                                          | PIM2   |
| 5317768  | Glypallichalcone                                          | PLK1   |
| 5317768  | Glypallichalcone                                          | PNMT   |
| 5317768  | Glypallichalcone                                          | PPARG  |
| 5317768  | Glypallichalcone                                          | PTGS1  |
| 5317768  | Glypallichalcone                                          | PTGS2  |
| 5317768  | Glypallichalcone                                          | PTPN1  |
| 5317768  | Glypallichalcone                                          | RAF1   |
| 5317768  | Glypallichalcone                                          | RET    |
| 5317768  | Glypallichalcone                                          | ROCK1  |
| 5317768  | Glypallichalcone                                          | ROCK2  |
| 5317768  | Glypallichalcone                                          | SLC1A3 |
| 5317768  | Glypallichalcone                                          | SNCA   |
| 5317768  | Glypallichalcone                                          | TERT   |
| 5317768  | Glypallichalcone                                          | TLR9   |
| 5317768  | Glypallichalcone                                          | TUBB1  |
| 5317768  | Glypallichalcone                                          | VCP    |
| 5317768  | Glypallichalcone                                          | WEE1   |
| 10542808 | 8-(6-hydroxy-2-benzofuranyl)-<br>2,2-dimethyl-5-chromenol | ADRA2A |
| 10542808 | 8-(6-hydroxy-2-benzofuranyl)-<br>2,2-dimethyl-5-chromenol | BACE1  |
| 10542808 | 8-(6-hydroxy-2-benzofuranyl)-<br>2,2-dimethyl-5-chromenol | BMP1   |
| 10542808 | 8-(6-hydroxy-2-benzofuranyl)-<br>2,2-dimethyl-5-chromenol | BRAF   |

|          |                                                           |          |
|----------|-----------------------------------------------------------|----------|
| 10542808 | 8-(6-hydroxy-2-benzofuranyl)-<br>2,2-dimethyl-5-chromenol | EDNRA    |
| 10542808 | 8-(6-hydroxy-2-benzofuranyl)-<br>2,2-dimethyl-5-chromenol | EIF2AK3  |
| 10542808 | 8-(6-hydroxy-2-benzofuranyl)-<br>2,2-dimethyl-5-chromenol | ESR1     |
| 10542808 | 8-(6-hydroxy-2-benzofuranyl)-<br>2,2-dimethyl-5-chromenol | GSK3B    |
| 10542808 | 8-(6-hydroxy-2-benzofuranyl)-<br>2,2-dimethyl-5-chromenol | HSD17B1  |
| 10542808 | 8-(6-hydroxy-2-benzofuranyl)-<br>2,2-dimethyl-5-chromenol | HSD17B2  |
| 10542808 | 8-(6-hydroxy-2-benzofuranyl)-<br>2,2-dimethyl-5-chromenol | HSP90AA1 |
| 10542808 | 8-(6-hydroxy-2-benzofuranyl)-<br>2,2-dimethyl-5-chromenol | HSP90AB1 |
| 10542808 | 8-(6-hydroxy-2-benzofuranyl)-<br>2,2-dimethyl-5-chromenol | LRRK2    |
| 10542808 | 8-(6-hydroxy-2-benzofuranyl)-<br>2,2-dimethyl-5-chromenol | MAP3K12  |
| 10542808 | 8-(6-hydroxy-2-benzofuranyl)-<br>2,2-dimethyl-5-chromenol | MAPK1    |
| 10542808 | 8-(6-hydroxy-2-benzofuranyl)-<br>2,2-dimethyl-5-chromenol | MTOR     |
| 10542808 | 8-(6-hydroxy-2-benzofuranyl)-<br>2,2-dimethyl-5-chromenol | OPRD1    |
| 10542808 | 8-(6-hydroxy-2-benzofuranyl)-<br>2,2-dimethyl-5-chromenol | PIK3CA   |
| 5318999  | Licochalcone B                                            | ABCB1    |
| 5318999  | Licochalcone B                                            | ABCC1    |
| 5318999  | Licochalcone B                                            | ABCG2    |
| 5318999  | Licochalcone B                                            | ABL1     |
| 5318999  | Licochalcone B                                            | ADAM17   |
| 5318999  | Licochalcone B                                            | ADCY5    |
| 5318999  | Licochalcone B                                            | AKR1B1   |
| 5318999  | Licochalcone B                                            | ALOX5    |
| 5318999  | Licochalcone B                                            | APP      |
| 5318999  | Licochalcone B                                            | BACE1    |
| 5318999  | Licochalcone B                                            | BCL2     |
| 5318999  | Licochalcone B                                            | BCL2L1   |
| 5318999  | Licochalcone B                                            | BRAF     |
| 5318999  | Licochalcone B                                            | CALM1    |
| 5318999  | Licochalcone B                                            | CAPN1    |
| 5318999  | Licochalcone B                                            | CBR1     |

|         |                |          |
|---------|----------------|----------|
| 5318999 | Licochalcone B | CCNB1    |
| 5318999 | Licochalcone B | CCNE1    |
| 5318999 | Licochalcone B | CCNE1    |
| 5318999 | Licochalcone B | CDK1     |
| 5318999 | Licochalcone B | CDK2     |
| 5318999 | Licochalcone B | CDK3     |
| 5318999 | Licochalcone B | CDK4     |
| 5318999 | Licochalcone B | CHEK1    |
| 5318999 | Licochalcone B | CHRNA7   |
| 5318999 | Licochalcone B | CLK1     |
| 5318999 | Licochalcone B | CXCR4    |
| 5318999 | Licochalcone B | CYP19A1  |
| 5318999 | Licochalcone B | CYP1B1   |
| 5318999 | Licochalcone B | DUSP3    |
| 5318999 | Licochalcone B | EGFR     |
| 5318999 | Licochalcone B | ERN1     |
| 5318999 | Licochalcone B | ESR1     |
| 5318999 | Licochalcone B | ESR2     |
| 5318999 | Licochalcone B | ESRRA    |
| 5318999 | Licochalcone B | ESRRB    |
| 5318999 | Licochalcone B | F3       |
| 5318999 | Licochalcone B | FLT3     |
| 5318999 | Licochalcone B | GLI1     |
| 5318999 | Licochalcone B | GLI2     |
| 5318999 | Licochalcone B | GRK2     |
| 5318999 | Licochalcone B | HDAC4    |
| 5318999 | Licochalcone B | HDAC8    |
| 5318999 | Licochalcone B | HPGDS    |
| 5318999 | Licochalcone B | HSD17B14 |
| 5318999 | Licochalcone B | IGF1R    |
| 5318999 | Licochalcone B | INSR     |
| 5318999 | Licochalcone B | KCNA3    |
| 5318999 | Licochalcone B | MAOA     |
| 5318999 | Licochalcone B | MAOB     |
| 5318999 | Licochalcone B | MAP4K4   |
| 5318999 | Licochalcone B | MAPT     |
| 5318999 | Licochalcone B | MMP2     |
| 5318999 | Licochalcone B | MMP3     |
| 5318999 | Licochalcone B | MMP8     |
| 5318999 | Licochalcone B | MTOR     |
| 5318999 | Licochalcone B | NOS2     |
| 5318999 | Licochalcone B | NOX4     |
| 5318999 | Licochalcone B | NQO2     |
| 5318999 | Licochalcone B | ODC1     |

|          |                |         |
|----------|----------------|---------|
| 5318999  | Licochalcone B | PDGFRB  |
| 5318999  | Licochalcone B | PDK1    |
| 5318999  | Licochalcone B | PDPK1   |
| 5318999  | Licochalcone B | PLAU    |
| 5318999  | Licochalcone B | PLK1    |
| 5318999  | Licochalcone B | PTGS1   |
| 5318999  | Licochalcone B | PTGS2   |
| 5318999  | Licochalcone B | PTPN1   |
| 5318999  | Licochalcone B | RAF1    |
| 5318999  | Licochalcone B | RPS6KB1 |
| 5318999  | Licochalcone B | SHBG    |
| 5318999  | Licochalcone B | SIGMAR1 |
| 5318999  | Licochalcone B | SLC9A1  |
| 5318999  | Licochalcone B | SNCA    |
| 5318999  | Licochalcone B | TERT    |
| 5318999  | Licochalcone B | THRA    |
| 5318999  | Licochalcone B | THRB    |
| 5318999  | Licochalcone B | TUBB1   |
| 5318999  | Licochalcone B | TYR     |
| 5318999  | Licochalcone B | VCP     |
| 5318999  | Licochalcone B | WEE1    |
| 5318999  | Licochalcone B | YWHAG   |
| 49856081 | licochalcone G | ABCB1   |
| 49856081 | licochalcone G | ABCG2   |
| 49856081 | licochalcone G | ABL1    |
| 49856081 | licochalcone G | ACHE    |
| 49856081 | licochalcone G | ADAM17  |
| 49856081 | licochalcone G | ADORA1  |
| 49856081 | licochalcone G | AKR1B1  |
| 49856081 | licochalcone G | ALDH2   |
| 49856081 | licochalcone G | ALOX5   |
| 49856081 | licochalcone G | APP     |
| 49856081 | licochalcone G | BACE1   |
| 49856081 | licochalcone G | BCHE    |
| 49856081 | licochalcone G | BMP1    |
| 49856081 | licochalcone G | BRAF    |
| 49856081 | licochalcone G | CA6     |
| 49856081 | licochalcone G | CCND1   |
| 49856081 | licochalcone G | CCNE1   |
| 49856081 | licochalcone G | CCNE2   |
| 49856081 | licochalcone G | CDC25A  |
| 49856081 | licochalcone G | CDK2    |
| 49856081 | licochalcone G | CDK4    |
| 49856081 | licochalcone G | CHRNA7  |

|          |                |          |
|----------|----------------|----------|
| 49856081 | licochalcone G | CSF1R    |
| 49856081 | licochalcone G | CTSD     |
| 49856081 | licochalcone G | CYP19A1  |
| 49856081 | licochalcone G | ECE1     |
| 49856081 | licochalcone G | EGFR     |
| 49856081 | licochalcone G | ESRRB    |
| 49856081 | licochalcone G | F10      |
| 49856081 | licochalcone G | F3       |
| 49856081 | licochalcone G | FLT3     |
| 49856081 | licochalcone G | GNRHR    |
| 49856081 | licochalcone G | HDAC1    |
| 49856081 | licochalcone G | HDAC10   |
| 49856081 | licochalcone G | HDAC3    |
| 49856081 | licochalcone G | HDAC4    |
| 49856081 | licochalcone G | HDAC5    |
| 49856081 | licochalcone G | HDAC6    |
| 49856081 | licochalcone G | HDAC7    |
| 49856081 | licochalcone G | HDAC8    |
| 49856081 | licochalcone G | HDAC9    |
| 49856081 | licochalcone G | HPGDS    |
| 49856081 | licochalcone G | HSP90AB1 |
| 49856081 | licochalcone G | ITK      |
| 49856081 | licochalcone G | JAK2     |
| 49856081 | licochalcone G | KCNA3    |
| 49856081 | licochalcone G | KDM1A    |
| 49856081 | licochalcone G | MAOA     |
| 49856081 | licochalcone G | MAOB     |
| 49856081 | licochalcone G | MAPK14   |
| 49856081 | licochalcone G | MAPKAPK2 |
| 49856081 | licochalcone G | MAPKAPK5 |
| 49856081 | licochalcone G | MMP1     |
| 49856081 | licochalcone G | MMP13    |
| 49856081 | licochalcone G | MMP14    |
| 49856081 | licochalcone G | MMP16    |
| 49856081 | licochalcone G | MMP8     |
| 49856081 | licochalcone G | MMP9     |
| 49856081 | licochalcone G | NAAA     |
| 49856081 | licochalcone G | NOS2     |
| 49856081 | licochalcone G | NR1H4    |
| 49856081 | licochalcone G | ODC1     |
| 49856081 | licochalcone G | PDE4B    |
| 49856081 | licochalcone G | PDGFRB   |
| 49856081 | licochalcone G | PDK1     |
| 49856081 | licochalcone G | PDPK1    |

|          |                |          |
|----------|----------------|----------|
| 49856081 | licochalcone G | PIM1     |
| 49856081 | licochalcone G | PIM2     |
| 49856081 | licochalcone G | PIM3     |
| 49856081 | licochalcone G | PLA2G1B  |
| 49856081 | licochalcone G | PLA2G2A  |
| 49856081 | licochalcone G | PRKCB    |
| 49856081 | licochalcone G | PTGS1    |
| 49856081 | licochalcone G | PTGS2    |
| 49856081 | licochalcone G | PTPN1    |
| 49856081 | licochalcone G | PTPN11   |
| 49856081 | licochalcone G | PTPN6    |
| 49856081 | licochalcone G | RAF1     |
| 49856081 | licochalcone G | RET      |
| 49856081 | licochalcone G | RPS6KB1  |
| 49856081 | licochalcone G | SLC29A1  |
| 49856081 | licochalcone G | SLC5A1   |
| 49856081 | licochalcone G | SLC5A2   |
| 49856081 | licochalcone G | SSTR2    |
| 49856081 | licochalcone G | TERT     |
| 49856081 | licochalcone G | TGFBR1   |
| 49856081 | licochalcone G | THRA     |
| 49856081 | licochalcone G | THRB     |
| 49856081 | licochalcone G | TKT      |
| 49856081 | licochalcone G | TNF      |
| 49856081 | licochalcone G | TRPM8    |
| 49856081 | licochalcone G | TYR      |
| 5320083  | Glycyrol       | ALOX12   |
| 5320083  | Glycyrol       | ALOX15   |
| 5320083  | Glycyrol       | CA13     |
| 5320083  | Glycyrol       | CCR4     |
| 5320083  | Glycyrol       | CFTR     |
| 5320083  | Glycyrol       | CXCR2    |
| 5320083  | Glycyrol       | EGLN1    |
| 5320083  | Glycyrol       | EP300    |
| 5320083  | Glycyrol       | ESR1     |
| 5320083  | Glycyrol       | ESR2     |
| 5320083  | Glycyrol       | FNTA     |
| 5320083  | Glycyrol       | FNTB     |
| 5320083  | Glycyrol       | GCGR     |
| 5320083  | Glycyrol       | GPR84    |
| 5320083  | Glycyrol       | HSD17B1  |
| 5320083  | Glycyrol       | HSP90AA1 |
| 5320083  | Glycyrol       | HSP90AB1 |
| 5320083  | Glycyrol       | HSP90B1  |

|          |                                                                                  |         |
|----------|----------------------------------------------------------------------------------|---------|
| 5320083  | Glycyrol                                                                         | IDH1    |
| 5320083  | Glycyrol                                                                         | MPI     |
| 5320083  | Glycyrol                                                                         | NFKB1   |
| 5320083  | Glycyrol                                                                         | NOS2    |
| 5320083  | Glycyrol                                                                         | NOX4    |
| 5320083  | Glycyrol                                                                         | PDE10A  |
| 5320083  | Glycyrol                                                                         | PDE4D   |
| 5320083  | Glycyrol                                                                         | PLAU    |
| 5320083  | Glycyrol                                                                         | ROCK2   |
| 5320083  | Glycyrol                                                                         | SRD5A1  |
| 5320083  | Glycyrol                                                                         | XPO1    |
| 10090416 | 3-(2,4-dihydroxyphenyl)-8-(1,1-dimethylprop-2-enyl)-7-hydroxy-5-methoxy-coumarin | ABL1    |
| 10090416 | 3-(2,4-dihydroxyphenyl)-8-(1,1-dimethylprop-2-enyl)-7-hydroxy-5-methoxy-coumarin | ACHE    |
| 10090416 | 3-(2,4-dihydroxyphenyl)-8-(1,1-dimethylprop-2-enyl)-7-hydroxy-5-methoxy-coumarin | ADORA2B |
| 10090416 | 3-(2,4-dihydroxyphenyl)-8-(1,1-dimethylprop-2-enyl)-7-hydroxy-5-methoxy-coumarin | AKR1B10 |
| 10090416 | 3-(2,4-dihydroxyphenyl)-8-(1,1-dimethylprop-2-enyl)-7-hydroxy-5-methoxy-coumarin | AURKA   |
| 10090416 | 3-(2,4-dihydroxyphenyl)-8-(1,1-dimethylprop-2-enyl)-7-hydroxy-5-methoxy-coumarin | AURKB   |
| 10090416 | 3-(2,4-dihydroxyphenyl)-8-(1,1-dimethylprop-2-enyl)-7-hydroxy-5-methoxy-coumarin | BMP1    |
| 10090416 | 3-(2,4-dihydroxyphenyl)-8-(1,1-dimethylprop-2-enyl)-7-hydroxy-5-methoxy-coumarin | CA1     |
| 10090416 | 3-(2,4-dihydroxyphenyl)-8-(1,1-dimethylprop-2-enyl)-7-hydroxy-5-methoxy-coumarin | CA2     |
| 10090416 | 3-(2,4-dihydroxyphenyl)-8-(1,1-dimethylprop-2-enyl)-7-hydroxy-5-methoxy-coumarin | CDC25A  |
| 10090416 | 3-(2,4-dihydroxyphenyl)-8-(1,1-dimethylprop-2-enyl)-7-hydroxy-5-methoxy-coumarin | CDC25B  |



|          |                                                                                  |         |
|----------|----------------------------------------------------------------------------------|---------|
| 10090416 | 3-(2,4-dihydroxyphenyl)-8-(1,1-dimethylprop-2-enyl)-7-hydroxy-5-methoxy-coumarin | CTSD    |
| 10090416 | 3-(2,4-dihydroxyphenyl)-8-(1,1-dimethylprop-2-enyl)-7-hydroxy-5-methoxy-coumarin | CYP19A1 |
| 10090416 | 3-(2,4-dihydroxyphenyl)-8-(1,1-dimethylprop-2-enyl)-7-hydroxy-5-methoxy-coumarin | CYP2C19 |
| 10090416 | 3-(2,4-dihydroxyphenyl)-8-(1,1-dimethylprop-2-enyl)-7-hydroxy-5-methoxy-coumarin | CYP3A4  |
| 10090416 | 3-(2,4-dihydroxyphenyl)-8-(1,1-dimethylprop-2-enyl)-7-hydroxy-5-methoxy-coumarin | DNM1    |
| 10090416 | 3-(2,4-dihydroxyphenyl)-8-(1,1-dimethylprop-2-enyl)-7-hydroxy-5-methoxy-coumarin | EP300   |
| 10090416 | 3-(2,4-dihydroxyphenyl)-8-(1,1-dimethylprop-2-enyl)-7-hydroxy-5-methoxy-coumarin | ESR1    |
| 10090416 | 3-(2,4-dihydroxyphenyl)-8-(1,1-dimethylprop-2-enyl)-7-hydroxy-5-methoxy-coumarin | ESR2    |
| 10090416 | 3-(2,4-dihydroxyphenyl)-8-(1,1-dimethylprop-2-enyl)-7-hydroxy-5-methoxy-coumarin | F10     |
| 10090416 | 3-(2,4-dihydroxyphenyl)-8-(1,1-dimethylprop-2-enyl)-7-hydroxy-5-methoxy-coumarin | FLT1    |
| 10090416 | 3-(2,4-dihydroxyphenyl)-8-(1,1-dimethylprop-2-enyl)-7-hydroxy-5-methoxy-coumarin | FLT3    |
| 10090416 | 3-(2,4-dihydroxyphenyl)-8-(1,1-dimethylprop-2-enyl)-7-hydroxy-5-methoxy-coumarin | GNRHR   |
| 10090416 | 3-(2,4-dihydroxyphenyl)-8-(1,1-dimethylprop-2-enyl)-7-hydroxy-5-methoxy-coumarin | HDAC2   |
| 10090416 | 3-(2,4-dihydroxyphenyl)-8-(1,1-dimethylprop-2-enyl)-7-hydroxy-5-methoxy-coumarin | HDAC3   |

|          |                                                                                  |          |
|----------|----------------------------------------------------------------------------------|----------|
| 10090416 | 3-(2,4-dihydroxyphenyl)-8-(1,1-dimethylprop-2-enyl)-7-hydroxy-5-methoxy-coumarin | HSD17B1  |
| 10090416 | 3-(2,4-dihydroxyphenyl)-8-(1,1-dimethylprop-2-enyl)-7-hydroxy-5-methoxy-coumarin | HSD17B2  |
| 10090416 | 3-(2,4-dihydroxyphenyl)-8-(1,1-dimethylprop-2-enyl)-7-hydroxy-5-methoxy-coumarin | HSP90AA1 |
| 10090416 | 3-(2,4-dihydroxyphenyl)-8-(1,1-dimethylprop-2-enyl)-7-hydroxy-5-methoxy-coumarin | KDR      |
| 10090416 | 3-(2,4-dihydroxyphenyl)-8-(1,1-dimethylprop-2-enyl)-7-hydroxy-5-methoxy-coumarin | MAOB     |
| 10090416 | 3-(2,4-dihydroxyphenyl)-8-(1,1-dimethylprop-2-enyl)-7-hydroxy-5-methoxy-coumarin | MAPK14   |
| 10090416 | 3-(2,4-dihydroxyphenyl)-8-(1,1-dimethylprop-2-enyl)-7-hydroxy-5-methoxy-coumarin | MDM2     |
| 10090416 | 3-(2,4-dihydroxyphenyl)-8-(1,1-dimethylprop-2-enyl)-7-hydroxy-5-methoxy-coumarin | MDM4     |
| 10090416 | 3-(2,4-dihydroxyphenyl)-8-(1,1-dimethylprop-2-enyl)-7-hydroxy-5-methoxy-coumarin | MET      |
| 10090416 | 3-(2,4-dihydroxyphenyl)-8-(1,1-dimethylprop-2-enyl)-7-hydroxy-5-methoxy-coumarin | MMP1     |
| 10090416 | 3-(2,4-dihydroxyphenyl)-8-(1,1-dimethylprop-2-enyl)-7-hydroxy-5-methoxy-coumarin | MMP13    |
| 10090416 | 3-(2,4-dihydroxyphenyl)-8-(1,1-dimethylprop-2-enyl)-7-hydroxy-5-methoxy-coumarin | NPY5R    |
| 10090416 | 3-(2,4-dihydroxyphenyl)-8-(1,1-dimethylprop-2-enyl)-7-hydroxy-5-methoxy-coumarin | NR1H4    |
| 10090416 | 3-(2,4-dihydroxyphenyl)-8-(1,1-dimethylprop-2-enyl)-7-hydroxy-5-methoxy-coumarin | OPRM1    |

|          |                                                                                  |        |
|----------|----------------------------------------------------------------------------------|--------|
| 10090416 | 3-(2,4-dihydroxyphenyl)-8-(1,1-dimethylprop-2-enyl)-7-hydroxy-5-methoxy-coumarin | P2RX3  |
| 10090416 | 3-(2,4-dihydroxyphenyl)-8-(1,1-dimethylprop-2-enyl)-7-hydroxy-5-methoxy-coumarin | PDE10A |
| 10090416 | 3-(2,4-dihydroxyphenyl)-8-(1,1-dimethylprop-2-enyl)-7-hydroxy-5-methoxy-coumarin | PDE4D  |
| 10090416 | 3-(2,4-dihydroxyphenyl)-8-(1,1-dimethylprop-2-enyl)-7-hydroxy-5-methoxy-coumarin | PDGFRA |
| 10090416 | 3-(2,4-dihydroxyphenyl)-8-(1,1-dimethylprop-2-enyl)-7-hydroxy-5-methoxy-coumarin | PDGFRB |
| 10090416 | 3-(2,4-dihydroxyphenyl)-8-(1,1-dimethylprop-2-enyl)-7-hydroxy-5-methoxy-coumarin | PDGFRB |
| 10090416 | 3-(2,4-dihydroxyphenyl)-8-(1,1-dimethylprop-2-enyl)-7-hydroxy-5-methoxy-coumarin | PDK1   |
| 10090416 | 3-(2,4-dihydroxyphenyl)-8-(1,1-dimethylprop-2-enyl)-7-hydroxy-5-methoxy-coumarin | PDPK1  |
| 10090416 | 3-(2,4-dihydroxyphenyl)-8-(1,1-dimethylprop-2-enyl)-7-hydroxy-5-methoxy-coumarin | PIM1   |
| 10090416 | 3-(2,4-dihydroxyphenyl)-8-(1,1-dimethylprop-2-enyl)-7-hydroxy-5-methoxy-coumarin | PIM2   |
| 10090416 | 3-(2,4-dihydroxyphenyl)-8-(1,1-dimethylprop-2-enyl)-7-hydroxy-5-methoxy-coumarin | PIM3   |
| 10090416 | 3-(2,4-dihydroxyphenyl)-8-(1,1-dimethylprop-2-enyl)-7-hydroxy-5-methoxy-coumarin | PLK1   |
| 10090416 | 3-(2,4-dihydroxyphenyl)-8-(1,1-dimethylprop-2-enyl)-7-hydroxy-5-methoxy-coumarin | PTGIR  |
| 10090416 | 3-(2,4-dihydroxyphenyl)-8-(1,1-dimethylprop-2-enyl)-7-hydroxy-5-methoxy-coumarin | PTGS1  |

|          |                                                                                  |         |
|----------|----------------------------------------------------------------------------------|---------|
| 10090416 | 3-(2,4-dihydroxyphenyl)-8-(1,1-dimethylprop-2-enyl)-7-hydroxy-5-methoxy-coumarin | PTPN1   |
| 10090416 | 3-(2,4-dihydroxyphenyl)-8-(1,1-dimethylprop-2-enyl)-7-hydroxy-5-methoxy-coumarin | PTPN11  |
| 10090416 | 3-(2,4-dihydroxyphenyl)-8-(1,1-dimethylprop-2-enyl)-7-hydroxy-5-methoxy-coumarin | PTPN6   |
| 10090416 | 3-(2,4-dihydroxyphenyl)-8-(1,1-dimethylprop-2-enyl)-7-hydroxy-5-methoxy-coumarin | RET     |
| 10090416 | 3-(2,4-dihydroxyphenyl)-8-(1,1-dimethylprop-2-enyl)-7-hydroxy-5-methoxy-coumarin | RPS6KB1 |
| 10090416 | 3-(2,4-dihydroxyphenyl)-8-(1,1-dimethylprop-2-enyl)-7-hydroxy-5-methoxy-coumarin | SLC29A1 |
| 10090416 | 3-(2,4-dihydroxyphenyl)-8-(1,1-dimethylprop-2-enyl)-7-hydroxy-5-methoxy-coumarin | SLC5A1  |
| 10090416 | 3-(2,4-dihydroxyphenyl)-8-(1,1-dimethylprop-2-enyl)-7-hydroxy-5-methoxy-coumarin | SLC5A2  |
| 10090416 | 3-(2,4-dihydroxyphenyl)-8-(1,1-dimethylprop-2-enyl)-7-hydroxy-5-methoxy-coumarin | SRC     |
| 10090416 | 3-(2,4-dihydroxyphenyl)-8-(1,1-dimethylprop-2-enyl)-7-hydroxy-5-methoxy-coumarin | TAS2R31 |
| 10090416 | 3-(2,4-dihydroxyphenyl)-8-(1,1-dimethylprop-2-enyl)-7-hydroxy-5-methoxy-coumarin | TGFBR1  |
| 10090416 | 3-(2,4-dihydroxyphenyl)-8-(1,1-dimethylprop-2-enyl)-7-hydroxy-5-methoxy-coumarin | TGM2    |
| 10090416 | 3-(2,4-dihydroxyphenyl)-8-(1,1-dimethylprop-2-enyl)-7-hydroxy-5-methoxy-coumarin | THRA    |
| 10090416 | 3-(2,4-dihydroxyphenyl)-8-(1,1-dimethylprop-2-enyl)-7-hydroxy-5-methoxy-coumarin | THRB    |

|          |                                                                                  |          |
|----------|----------------------------------------------------------------------------------|----------|
| 10090416 | 3-(2,4-dihydroxyphenyl)-8-(1,1-dimethylprop-2-enyl)-7-hydroxy-5-methoxy-coumarin | TKT      |
| 10090416 | 3-(2,4-dihydroxyphenyl)-8-(1,1-dimethylprop-2-enyl)-7-hydroxy-5-methoxy-coumarin | TRPM8    |
| 10090416 | 3-(2,4-dihydroxyphenyl)-8-(1,1-dimethylprop-2-enyl)-7-hydroxy-5-methoxy-coumarin | TRPV1    |
| 10090416 | 3-(2,4-dihydroxyphenyl)-8-(1,1-dimethylprop-2-enyl)-7-hydroxy-5-methoxy-coumarin | XPO1     |
| 5319013  | Licoricone                                                                       | ABCB1    |
| 5319013  | Licoricone                                                                       | ACHE     |
| 5319013  | Licoricone                                                                       | ACP1     |
| 5319013  | Licoricone                                                                       | ADRB1    |
| 5319013  | Licoricone                                                                       | ADRB2    |
| 5319013  | Licoricone                                                                       | AGTR1    |
| 5319013  | Licoricone                                                                       | ALDH2    |
| 5319013  | Licoricone                                                                       | CA4      |
| 5319013  | Licoricone                                                                       | CBR1     |
| 5319013  | Licoricone                                                                       | CCND1    |
| 5319013  | Licoricone                                                                       | CDK1     |
| 5319013  | Licoricone                                                                       | CDK2     |
| 5319013  | Licoricone                                                                       | CDK4     |
| 5319013  | Licoricone                                                                       | CHEK2    |
| 5319013  | Licoricone                                                                       | CNOT7    |
| 5319013  | Licoricone                                                                       | CYP19A1  |
| 5319013  | Licoricone                                                                       | F10      |
| 5319013  | Licoricone                                                                       | GCGR     |
| 5319013  | Licoricone                                                                       | HSP90AA1 |
| 5319013  | Licoricone                                                                       | HSP90AB1 |
| 5319013  | Licoricone                                                                       | HSP90B1  |
| 5319013  | Licoricone                                                                       | IL2      |
| 5319013  | Licoricone                                                                       | MELK     |
| 5319013  | Licoricone                                                                       | MTOR     |
| 5319013  | Licoricone                                                                       | OPRK1    |
| 5319013  | Licoricone                                                                       | PDK1     |
| 5319013  | Licoricone                                                                       | PIM1     |
| 5319013  | Licoricone                                                                       | PIM2     |
| 5319013  | Licoricone                                                                       | PIM3     |
| 5319013  | Licoricone                                                                       | PTPN1    |
| 5319013  | Licoricone                                                                       | SIRT1    |
| 5319013  | Licoricone                                                                       | SRC      |

|         |             |          |
|---------|-------------|----------|
| 5317478 | Gancaonin A | ABCB1    |
| 5317478 | Gancaonin A | ABCG2    |
| 5317478 | Gancaonin A | ACHE     |
| 5317478 | Gancaonin A | ADORA1   |
| 5317478 | Gancaonin A | ADORA2A  |
| 5317478 | Gancaonin A | AGTR1    |
| 5317478 | Gancaonin A | ALDH2    |
| 5317478 | Gancaonin A | ALOX12   |
| 5317478 | Gancaonin A | ALOX15   |
| 5317478 | Gancaonin A | CA12     |
| 5317478 | Gancaonin A | CA4      |
| 5317478 | Gancaonin A | CA7      |
| 5317478 | Gancaonin A | CALCA    |
| 5317478 | Gancaonin A | CBR1     |
| 5317478 | Gancaonin A | CDK2     |
| 5317478 | Gancaonin A | CDK4     |
| 5317478 | Gancaonin A | CNOT7    |
| 5317478 | Gancaonin A | CXCR2    |
| 5317478 | Gancaonin A | CYP19A1  |
| 5317478 | Gancaonin A | DUSP3    |
| 5317478 | Gancaonin A | EGFR     |
| 5317478 | Gancaonin A | EGLN1    |
| 5317478 | Gancaonin A | ESR1     |
| 5317478 | Gancaonin A | ESR2     |
| 5317478 | Gancaonin A | ESRRA    |
| 5317478 | Gancaonin A | ESRRB    |
| 5317478 | Gancaonin A | FBP1     |
| 5317478 | Gancaonin A | GABRA1   |
| 5317478 | Gancaonin A | GABRA3   |
| 5317478 | Gancaonin A | GABRB3   |
| 5317478 | Gancaonin A | GABRB3   |
| 5317478 | Gancaonin A | GABRG2   |
| 5317478 | Gancaonin A | GABRG2   |
| 5317478 | Gancaonin A | HSD17B1  |
| 5317478 | Gancaonin A | HSD17B2  |
| 5317478 | Gancaonin A | HSP90AA1 |
| 5317478 | Gancaonin A | HSP90AB1 |
| 5317478 | Gancaonin A | HSP90B1  |
| 5317478 | Gancaonin A | HTR2A    |
| 5317478 | Gancaonin A | HTR2C    |
| 5317478 | Gancaonin A | IL2      |
| 5317478 | Gancaonin A | KISS1R   |
| 5317478 | Gancaonin A | MAOA     |
| 5317478 | Gancaonin A | MGAM     |

|         |             |          |
|---------|-------------|----------|
| 5317478 | Gancaonin A | MIF      |
| 5317478 | Gancaonin A | NOS2     |
| 5317478 | Gancaonin A | OPRK1    |
| 5317478 | Gancaonin A | PDE5A    |
| 5317478 | Gancaonin A | PDK1     |
| 5317478 | Gancaonin A | PFKFB3   |
| 5317478 | Gancaonin A | PPARA    |
| 5317478 | Gancaonin A | PTGS1    |
| 5317478 | Gancaonin A | PTPN1    |
| 5317478 | Gancaonin A | RELA     |
| 5317478 | Gancaonin A | SLC6A2   |
| 5317478 | Gancaonin A | TBXAS1   |
| 5317478 | Gancaonin A | TYR      |
| 5317479 | Gancaonin B | ABCB1    |
| 5317479 | Gancaonin B | ABCG2    |
| 5317479 | Gancaonin B | ACHE     |
| 5317479 | Gancaonin B | ADORA1   |
| 5317479 | Gancaonin B | ALDH2    |
| 5317479 | Gancaonin B | ALOX12   |
| 5317479 | Gancaonin B | ALOX15   |
| 5317479 | Gancaonin B | CA1      |
| 5317479 | Gancaonin B | CA12     |
| 5317479 | Gancaonin B | CA2      |
| 5317479 | Gancaonin B | CA4      |
| 5317479 | Gancaonin B | CA7      |
| 5317479 | Gancaonin B | CBR1     |
| 5317479 | Gancaonin B | CHEK1    |
| 5317479 | Gancaonin B | CHEK2    |
| 5317479 | Gancaonin B | CYP19A1  |
| 5317479 | Gancaonin B | DUSP3    |
| 5317479 | Gancaonin B | EGFR     |
| 5317479 | Gancaonin B | ESR1     |
| 5317479 | Gancaonin B | ESR2     |
| 5317479 | Gancaonin B | ESRRA    |
| 5317479 | Gancaonin B | ESRRB    |
| 5317479 | Gancaonin B | F10      |
| 5317479 | Gancaonin B | FASN     |
| 5317479 | Gancaonin B | FBP1     |
| 5317479 | Gancaonin B | HSD17B1  |
| 5317479 | Gancaonin B | HSD17B2  |
| 5317479 | Gancaonin B | HSP90AA1 |
| 5317479 | Gancaonin B | HSP90AB1 |
| 5317479 | Gancaonin B | HSP90B1  |
| 5317479 | Gancaonin B | HTR2A    |

|          |                                                                      |        |
|----------|----------------------------------------------------------------------|--------|
| 5317479  | Gancaonin B                                                          | HTR2C  |
| 5317479  | Gancaonin B                                                          | IDH1   |
| 5317479  | Gancaonin B                                                          | IKBKB  |
| 5317479  | Gancaonin B                                                          | IL2    |
| 5317479  | Gancaonin B                                                          | KISS1R |
| 5317479  | Gancaonin B                                                          | MGAM   |
| 5317479  | Gancaonin B                                                          | MIF    |
| 5317479  | Gancaonin B                                                          | NOX4   |
| 5317479  | Gancaonin B                                                          | PDK1   |
| 5317479  | Gancaonin B                                                          | PFKFB3 |
| 5317479  | Gancaonin B                                                          | PLAU   |
| 5317479  | Gancaonin B                                                          | PPARA  |
| 5317479  | Gancaonin B                                                          | PRKCA  |
| 5317479  | Gancaonin B                                                          | PRKCB  |
| 5317479  | Gancaonin B                                                          | PRKCD  |
| 5317479  | Gancaonin B                                                          | PRKCE  |
| 5317479  | Gancaonin B                                                          | PRKCG  |
| 5317479  | Gancaonin B                                                          | PRKCH  |
| 5317479  | Gancaonin B                                                          | PTGES  |
| 5317479  | Gancaonin B                                                          | PTGS1  |
| 5317479  | Gancaonin B                                                          | PTGS2  |
| 5317479  | Gancaonin B                                                          | PTPN1  |
| 5317479  | Gancaonin B                                                          | PTPRS  |
| 5317479  | Gancaonin B                                                          | RELA   |
| 5317479  | Gancaonin B                                                          | SIRT1  |
| 5317479  | Gancaonin B                                                          | SLC6A2 |
| 5317479  | Gancaonin B                                                          | TBXAS1 |
| 5317479  | Gancaonin B                                                          | TYR    |
| 14604077 | 3-(3,4-dihydroxyphenyl)-5,7-dihydroxy-8-(3-methylbut-2-enyl)chromone | ABCB1  |
| 14604077 | 3-(3,4-dihydroxyphenyl)-5,7-dihydroxy-8-(3-methylbut-2-enyl)chromone | ACHE   |
| 14604077 | 3-(3,4-dihydroxyphenyl)-5,7-dihydroxy-8-(3-methylbut-2-enyl)chromone | AKT1   |
| 14604077 | 3-(3,4-dihydroxyphenyl)-5,7-dihydroxy-8-(3-methylbut-2-enyl)chromone | ALDH2  |
| 14604077 | 3-(3,4-dihydroxyphenyl)-5,7-dihydroxy-8-(3-methylbut-2-enyl)chromone | ALOX12 |



|          |                                                                      |          |
|----------|----------------------------------------------------------------------|----------|
| 14604077 | 3-(3,4-dihydroxyphenyl)-5,7-dihydroxy-8-(3-methylbut-2-enyl)chromone | ALOX15   |
| 14604077 | 3-(3,4-dihydroxyphenyl)-5,7-dihydroxy-8-(3-methylbut-2-enyl)chromone | BACE1    |
| 14604077 | 3-(3,4-dihydroxyphenyl)-5,7-dihydroxy-8-(3-methylbut-2-enyl)chromone | BCL2     |
| 14604077 | 3-(3,4-dihydroxyphenyl)-5,7-dihydroxy-8-(3-methylbut-2-enyl)chromone | CA4      |
| 14604077 | 3-(3,4-dihydroxyphenyl)-5,7-dihydroxy-8-(3-methylbut-2-enyl)chromone | CCR4     |
| 14604077 | 3-(3,4-dihydroxyphenyl)-5,7-dihydroxy-8-(3-methylbut-2-enyl)chromone | EGFR     |
| 14604077 | 3-(3,4-dihydroxyphenyl)-5,7-dihydroxy-8-(3-methylbut-2-enyl)chromone | ESR1     |
| 14604077 | 3-(3,4-dihydroxyphenyl)-5,7-dihydroxy-8-(3-methylbut-2-enyl)chromone | ESR2     |
| 14604077 | 3-(3,4-dihydroxyphenyl)-5,7-dihydroxy-8-(3-methylbut-2-enyl)chromone | ESRRA    |
| 14604077 | 3-(3,4-dihydroxyphenyl)-5,7-dihydroxy-8-(3-methylbut-2-enyl)chromone | ESRRB    |
| 14604077 | 3-(3,4-dihydroxyphenyl)-5,7-dihydroxy-8-(3-methylbut-2-enyl)chromone | F10      |
| 14604077 | 3-(3,4-dihydroxyphenyl)-5,7-dihydroxy-8-(3-methylbut-2-enyl)chromone | GCGR     |
| 14604077 | 3-(3,4-dihydroxyphenyl)-5,7-dihydroxy-8-(3-methylbut-2-enyl)chromone | HSD17B1  |
| 14604077 | 3-(3,4-dihydroxyphenyl)-5,7-dihydroxy-8-(3-methylbut-2-enyl)chromone | HSP90AA1 |

|          |                                                                      |          |
|----------|----------------------------------------------------------------------|----------|
| 14604077 | 3-(3,4-dihydroxyphenyl)-5,7-dihydroxy-8-(3-methylbut-2-enyl)chromone | HSP90AB1 |
| 14604077 | 3-(3,4-dihydroxyphenyl)-5,7-dihydroxy-8-(3-methylbut-2-enyl)chromone | HSP90B1  |
| 14604077 | 3-(3,4-dihydroxyphenyl)-5,7-dihydroxy-8-(3-methylbut-2-enyl)chromone | HTR2A    |
| 14604077 | 3-(3,4-dihydroxyphenyl)-5,7-dihydroxy-8-(3-methylbut-2-enyl)chromone | HTR2C    |
| 14604077 | 3-(3,4-dihydroxyphenyl)-5,7-dihydroxy-8-(3-methylbut-2-enyl)chromone | MAOA     |
| 14604077 | 3-(3,4-dihydroxyphenyl)-5,7-dihydroxy-8-(3-methylbut-2-enyl)chromone | MCL1     |
| 14604077 | 3-(3,4-dihydroxyphenyl)-5,7-dihydroxy-8-(3-methylbut-2-enyl)chromone | MGAM     |
| 14604077 | 3-(3,4-dihydroxyphenyl)-5,7-dihydroxy-8-(3-methylbut-2-enyl)chromone | MIF      |
| 14604077 | 3-(3,4-dihydroxyphenyl)-5,7-dihydroxy-8-(3-methylbut-2-enyl)chromone | NOS2     |
| 14604077 | 3-(3,4-dihydroxyphenyl)-5,7-dihydroxy-8-(3-methylbut-2-enyl)chromone | NOX4     |
| 14604077 | 3-(3,4-dihydroxyphenyl)-5,7-dihydroxy-8-(3-methylbut-2-enyl)chromone | PDE10A   |
| 14604077 | 3-(3,4-dihydroxyphenyl)-5,7-dihydroxy-8-(3-methylbut-2-enyl)chromone | PDE5A    |
| 14604077 | 3-(3,4-dihydroxyphenyl)-5,7-dihydroxy-8-(3-methylbut-2-enyl)chromone | PFKFB3   |
| 14604077 | 3-(3,4-dihydroxyphenyl)-5,7-dihydroxy-8-(3-methylbut-2-enyl)chromone | PLAU     |

|          |                                                                      |        |
|----------|----------------------------------------------------------------------|--------|
| 14604077 | 3-(3,4-dihydroxyphenyl)-5,7-dihydroxy-8-(3-methylbut-2-enyl)chromone | PTPN1  |
| 14604077 | 3-(3,4-dihydroxyphenyl)-5,7-dihydroxy-8-(3-methylbut-2-enyl)chromone | PTPRS  |
| 14604077 | 3-(3,4-dihydroxyphenyl)-5,7-dihydroxy-8-(3-methylbut-2-enyl)chromone | RELA   |
| 14604077 | 3-(3,4-dihydroxyphenyl)-5,7-dihydroxy-8-(3-methylbut-2-enyl)chromone | SIRT1  |
| 14604077 | 3-(3,4-dihydroxyphenyl)-5,7-dihydroxy-8-(3-methylbut-2-enyl)chromone | TBXAS1 |
| 14604077 | 3-(3,4-dihydroxyphenyl)-5,7-dihydroxy-8-(3-methylbut-2-enyl)chromone | TYR    |
| 14604077 | 3-(3,4-dihydroxyphenyl)-5,7-dihydroxy-8-(3-methylbut-2-enyl)chromone | XDH    |
| 14604078 | 5,7-dihydroxy-3-(4-methoxyphenyl)-8-(3-methylbut-2-enyl)chromone     | ABCB1  |
| 14604078 | 5,7-dihydroxy-3-(4-methoxyphenyl)-8-(3-methylbut-2-enyl)chromone     | ABCG2  |
| 14604078 | 5,7-dihydroxy-3-(4-methoxyphenyl)-8-(3-methylbut-2-enyl)chromone     | ACHE   |
| 14604078 | 5,7-dihydroxy-3-(4-methoxyphenyl)-8-(3-methylbut-2-enyl)chromone     | ADORA1 |
| 14604078 | 5,7-dihydroxy-3-(4-methoxyphenyl)-8-(3-methylbut-2-enyl)chromone     | ALDH2  |
| 14604078 | 5,7-dihydroxy-3-(4-methoxyphenyl)-8-(3-methylbut-2-enyl)chromone     | ALOX15 |
| 14604078 | 5,7-dihydroxy-3-(4-methoxyphenyl)-8-(3-methylbut-2-enyl)chromone     | BAD    |

|          |                                                                  |         |
|----------|------------------------------------------------------------------|---------|
| 14604078 | 5,7-dihydroxy-3-(4-methoxyphenyl)-8-(3-methylbut-2-enyl)chromone | BCL2    |
| 14604078 | 5,7-dihydroxy-3-(4-methoxyphenyl)-8-(3-methylbut-2-enyl)chromone | CA12    |
| 14604078 | 5,7-dihydroxy-3-(4-methoxyphenyl)-8-(3-methylbut-2-enyl)chromone | CA4     |
| 14604078 | 5,7-dihydroxy-3-(4-methoxyphenyl)-8-(3-methylbut-2-enyl)chromone | CA7     |
| 14604078 | 5,7-dihydroxy-3-(4-methoxyphenyl)-8-(3-methylbut-2-enyl)chromone | CBR1    |
| 14604078 | 5,7-dihydroxy-3-(4-methoxyphenyl)-8-(3-methylbut-2-enyl)chromone | CDK1    |
| 14604078 | 5,7-dihydroxy-3-(4-methoxyphenyl)-8-(3-methylbut-2-enyl)chromone | CDK2    |
| 14604078 | 5,7-dihydroxy-3-(4-methoxyphenyl)-8-(3-methylbut-2-enyl)chromone | CDK4    |
| 14604078 | 5,7-dihydroxy-3-(4-methoxyphenyl)-8-(3-methylbut-2-enyl)chromone | CNOT7   |
| 14604078 | 5,7-dihydroxy-3-(4-methoxyphenyl)-8-(3-methylbut-2-enyl)chromone | CYP19A1 |
| 14604078 | 5,7-dihydroxy-3-(4-methoxyphenyl)-8-(3-methylbut-2-enyl)chromone | DUSP3   |
| 14604078 | 5,7-dihydroxy-3-(4-methoxyphenyl)-8-(3-methylbut-2-enyl)chromone | EGFR    |
| 14604078 | 5,7-dihydroxy-3-(4-methoxyphenyl)-8-(3-methylbut-2-enyl)chromone | EP300   |
| 14604078 | 5,7-dihydroxy-3-(4-methoxyphenyl)-8-(3-methylbut-2-enyl)chromone | ESR2    |

|          |                                                                  |          |
|----------|------------------------------------------------------------------|----------|
| 14604078 | 5,7-dihydroxy-3-(4-methoxyphenyl)-8-(3-methylbut-2-enyl)chromone | ESRRA    |
| 14604078 | 5,7-dihydroxy-3-(4-methoxyphenyl)-8-(3-methylbut-2-enyl)chromone | ESRRB    |
| 14604078 | 5,7-dihydroxy-3-(4-methoxyphenyl)-8-(3-methylbut-2-enyl)chromone | FASN     |
| 14604078 | 5,7-dihydroxy-3-(4-methoxyphenyl)-8-(3-methylbut-2-enyl)chromone | FBP1     |
| 14604078 | 5,7-dihydroxy-3-(4-methoxyphenyl)-8-(3-methylbut-2-enyl)chromone | HSD17B1  |
| 14604078 | 5,7-dihydroxy-3-(4-methoxyphenyl)-8-(3-methylbut-2-enyl)chromone | HSD17B2  |
| 14604078 | 5,7-dihydroxy-3-(4-methoxyphenyl)-8-(3-methylbut-2-enyl)chromone | HSP90AA1 |
| 14604078 | 5,7-dihydroxy-3-(4-methoxyphenyl)-8-(3-methylbut-2-enyl)chromone | HSP90AB1 |
| 14604078 | 5,7-dihydroxy-3-(4-methoxyphenyl)-8-(3-methylbut-2-enyl)chromone | HSP90B1  |
| 14604078 | 5,7-dihydroxy-3-(4-methoxyphenyl)-8-(3-methylbut-2-enyl)chromone | HTR2A    |
| 14604078 | 5,7-dihydroxy-3-(4-methoxyphenyl)-8-(3-methylbut-2-enyl)chromone | HTR2C    |
| 14604078 | 5,7-dihydroxy-3-(4-methoxyphenyl)-8-(3-methylbut-2-enyl)chromone | IL2      |
| 14604078 | 5,7-dihydroxy-3-(4-methoxyphenyl)-8-(3-methylbut-2-enyl)chromone | MCL1     |
| 14604078 | 5,7-dihydroxy-3-(4-methoxyphenyl)-8-(3-methylbut-2-enyl)chromone | MELK     |

|          |                                                                      |        |
|----------|----------------------------------------------------------------------|--------|
| 14604078 | 5,7-dihydroxy-3-(4-methoxyphenyl)-8-(3-methylbut-2-enyl)chromone     | MGAM   |
| 14604078 | 5,7-dihydroxy-3-(4-methoxyphenyl)-8-(3-methylbut-2-enyl)chromone     | MPI    |
| 14604078 | 5,7-dihydroxy-3-(4-methoxyphenyl)-8-(3-methylbut-2-enyl)chromone     | NOS2   |
| 14604078 | 5,7-dihydroxy-3-(4-methoxyphenyl)-8-(3-methylbut-2-enyl)chromone     | PDE10A |
| 14604078 | 5,7-dihydroxy-3-(4-methoxyphenyl)-8-(3-methylbut-2-enyl)chromone     | PDE4D  |
| 14604078 | 5,7-dihydroxy-3-(4-methoxyphenyl)-8-(3-methylbut-2-enyl)chromone     | PDE5A  |
| 14604078 | 5,7-dihydroxy-3-(4-methoxyphenyl)-8-(3-methylbut-2-enyl)chromone     | PDK1   |
| 14604078 | 5,7-dihydroxy-3-(4-methoxyphenyl)-8-(3-methylbut-2-enyl)chromone     | PTGS1  |
| 14604078 | 5,7-dihydroxy-3-(4-methoxyphenyl)-8-(3-methylbut-2-enyl)chromone     | PTPN1  |
| 14604078 | 5,7-dihydroxy-3-(4-methoxyphenyl)-8-(3-methylbut-2-enyl)chromone     | RELA   |
| 14604078 | 5,7-dihydroxy-3-(4-methoxyphenyl)-8-(3-methylbut-2-enyl)chromone     | SLC6A2 |
| 14604081 | 2-(3,4-dihydroxyphenyl)-5,7-dihydroxy-6-(3-methylbut-2-enyl)chromone | ABCB1  |
| 14604081 | 2-(3,4-dihydroxyphenyl)-5,7-dihydroxy-6-(3-methylbut-2-enyl)chromone | ABCC1  |
| 14604081 | 2-(3,4-dihydroxyphenyl)-5,7-dihydroxy-6-(3-methylbut-2-enyl)chromone | ABCG2  |

|          |                                                                      |         |
|----------|----------------------------------------------------------------------|---------|
| 14604081 | 2-(3,4-dihydroxyphenyl)-5,7-dihydroxy-6-(3-methylbut-2-enyl)chromone | ACHE    |
| 14604081 | 2-(3,4-dihydroxyphenyl)-5,7-dihydroxy-6-(3-methylbut-2-enyl)chromone | ADORA1  |
| 14604081 | 2-(3,4-dihydroxyphenyl)-5,7-dihydroxy-6-(3-methylbut-2-enyl)chromone | ADORA2A |
| 14604081 | 2-(3,4-dihydroxyphenyl)-5,7-dihydroxy-6-(3-methylbut-2-enyl)chromone | AHR     |
| 14604081 | 2-(3,4-dihydroxyphenyl)-5,7-dihydroxy-6-(3-methylbut-2-enyl)chromone | AKR1A1  |
| 14604081 | 2-(3,4-dihydroxyphenyl)-5,7-dihydroxy-6-(3-methylbut-2-enyl)chromone | AKR1B1  |
| 14604081 | 2-(3,4-dihydroxyphenyl)-5,7-dihydroxy-6-(3-methylbut-2-enyl)chromone | AKR1B10 |
| 14604081 | 2-(3,4-dihydroxyphenyl)-5,7-dihydroxy-6-(3-methylbut-2-enyl)chromone | AKR1C1  |
| 14604081 | 2-(3,4-dihydroxyphenyl)-5,7-dihydroxy-6-(3-methylbut-2-enyl)chromone | AKR1C2  |
| 14604081 | 2-(3,4-dihydroxyphenyl)-5,7-dihydroxy-6-(3-methylbut-2-enyl)chromone | AKR1C3  |
| 14604081 | 2-(3,4-dihydroxyphenyl)-5,7-dihydroxy-6-(3-methylbut-2-enyl)chromone | AKR1C4  |
| 14604081 | 2-(3,4-dihydroxyphenyl)-5,7-dihydroxy-6-(3-methylbut-2-enyl)chromone | AKT1    |
| 14604081 | 2-(3,4-dihydroxyphenyl)-5,7-dihydroxy-6-(3-methylbut-2-enyl)chromone | ALK     |
| 14604081 | 2-(3,4-dihydroxyphenyl)-5,7-dihydroxy-6-(3-methylbut-2-enyl)chromone | ALOX12  |

|          |                                                                      |        |
|----------|----------------------------------------------------------------------|--------|
| 14604081 | 2-(3,4-dihydroxyphenyl)-5,7-dihydroxy-6-(3-methylbut-2-enyl)chromone | ALOX15 |
| 14604081 | 2-(3,4-dihydroxyphenyl)-5,7-dihydroxy-6-(3-methylbut-2-enyl)chromone | ALOX5  |
| 14604081 | 2-(3,4-dihydroxyphenyl)-5,7-dihydroxy-6-(3-methylbut-2-enyl)chromone | AMY1A  |
| 14604081 | 2-(3,4-dihydroxyphenyl)-5,7-dihydroxy-6-(3-methylbut-2-enyl)chromone | APEX1  |
| 14604081 | 2-(3,4-dihydroxyphenyl)-5,7-dihydroxy-6-(3-methylbut-2-enyl)chromone | APP    |
| 14604081 | 2-(3,4-dihydroxyphenyl)-5,7-dihydroxy-6-(3-methylbut-2-enyl)chromone | AR     |
| 14604081 | 2-(3,4-dihydroxyphenyl)-5,7-dihydroxy-6-(3-methylbut-2-enyl)chromone | ARG1   |
| 14604081 | 2-(3,4-dihydroxyphenyl)-5,7-dihydroxy-6-(3-methylbut-2-enyl)chromone | AURKB  |
| 14604081 | 2-(3,4-dihydroxyphenyl)-5,7-dihydroxy-6-(3-methylbut-2-enyl)chromone | AVPR2  |
| 14604081 | 2-(3,4-dihydroxyphenyl)-5,7-dihydroxy-6-(3-methylbut-2-enyl)chromone | BACE1  |
| 14604081 | 2-(3,4-dihydroxyphenyl)-5,7-dihydroxy-6-(3-methylbut-2-enyl)chromone | BCHE   |
| 14604081 | 2-(3,4-dihydroxyphenyl)-5,7-dihydroxy-6-(3-methylbut-2-enyl)chromone | CA1    |
| 14604081 | 2-(3,4-dihydroxyphenyl)-5,7-dihydroxy-6-(3-methylbut-2-enyl)chromone | CA12   |
| 14604081 | 2-(3,4-dihydroxyphenyl)-5,7-dihydroxy-6-(3-methylbut-2-enyl)chromone | CA13   |



|          |                                                                      |        |
|----------|----------------------------------------------------------------------|--------|
| 14604081 | 2-(3,4-dihydroxyphenyl)-5,7-dihydroxy-6-(3-methylbut-2-enyl)chromone | CA2    |
| 14604081 | 2-(3,4-dihydroxyphenyl)-5,7-dihydroxy-6-(3-methylbut-2-enyl)chromone | CA3    |
| 14604081 | 2-(3,4-dihydroxyphenyl)-5,7-dihydroxy-6-(3-methylbut-2-enyl)chromone | CA4    |
| 14604081 | 2-(3,4-dihydroxyphenyl)-5,7-dihydroxy-6-(3-methylbut-2-enyl)chromone | CA5A   |
| 14604081 | 2-(3,4-dihydroxyphenyl)-5,7-dihydroxy-6-(3-methylbut-2-enyl)chromone | CA6    |
| 14604081 | 2-(3,4-dihydroxyphenyl)-5,7-dihydroxy-6-(3-methylbut-2-enyl)chromone | CA7    |
| 14604081 | 2-(3,4-dihydroxyphenyl)-5,7-dihydroxy-6-(3-methylbut-2-enyl)chromone | CA9    |
| 14604081 | 2-(3,4-dihydroxyphenyl)-5,7-dihydroxy-6-(3-methylbut-2-enyl)chromone | CAMK2B |
| 14604081 | 2-(3,4-dihydroxyphenyl)-5,7-dihydroxy-6-(3-methylbut-2-enyl)chromone | CBR1   |
| 14604081 | 2-(3,4-dihydroxyphenyl)-5,7-dihydroxy-6-(3-methylbut-2-enyl)chromone | CCNB1  |
| 14604081 | 2-(3,4-dihydroxyphenyl)-5,7-dihydroxy-6-(3-methylbut-2-enyl)chromone | CCNB2  |
| 14604081 | 2-(3,4-dihydroxyphenyl)-5,7-dihydroxy-6-(3-methylbut-2-enyl)chromone | CCNB3  |
| 14604081 | 2-(3,4-dihydroxyphenyl)-5,7-dihydroxy-6-(3-methylbut-2-enyl)chromone | CD38   |
| 14604081 | 2-(3,4-dihydroxyphenyl)-5,7-dihydroxy-6-(3-methylbut-2-enyl)chromone | CDK1   |

|          |                                                                      |         |
|----------|----------------------------------------------------------------------|---------|
| 14604081 | 2-(3,4-dihydroxyphenyl)-5,7-dihydroxy-6-(3-methylbut-2-enyl)chromone | CDK5    |
| 14604081 | 2-(3,4-dihydroxyphenyl)-5,7-dihydroxy-6-(3-methylbut-2-enyl)chromone | CDK5R1  |
| 14604081 | 2-(3,4-dihydroxyphenyl)-5,7-dihydroxy-6-(3-methylbut-2-enyl)chromone | CDK6    |
| 14604081 | 2-(3,4-dihydroxyphenyl)-5,7-dihydroxy-6-(3-methylbut-2-enyl)chromone | CFTR    |
| 14604081 | 2-(3,4-dihydroxyphenyl)-5,7-dihydroxy-6-(3-methylbut-2-enyl)chromone | CSNK2A1 |
| 14604081 | 2-(3,4-dihydroxyphenyl)-5,7-dihydroxy-6-(3-methylbut-2-enyl)chromone | CYP19A1 |
| 14604081 | 2-(3,4-dihydroxyphenyl)-5,7-dihydroxy-6-(3-methylbut-2-enyl)chromone | CYP1B1  |
| 14604081 | 2-(3,4-dihydroxyphenyl)-5,7-dihydroxy-6-(3-methylbut-2-enyl)chromone | DAPK1   |
| 14604081 | 2-(3,4-dihydroxyphenyl)-5,7-dihydroxy-6-(3-methylbut-2-enyl)chromone | DRD4    |
| 14604081 | 2-(3,4-dihydroxyphenyl)-5,7-dihydroxy-6-(3-methylbut-2-enyl)chromone | ESRRA   |
| 14604081 | 2-(3,4-dihydroxyphenyl)-5,7-dihydroxy-6-(3-methylbut-2-enyl)chromone | F2      |
| 14604081 | 2-(3,4-dihydroxyphenyl)-5,7-dihydroxy-6-(3-methylbut-2-enyl)chromone | FLT3    |
| 14604081 | 2-(3,4-dihydroxyphenyl)-5,7-dihydroxy-6-(3-methylbut-2-enyl)chromone | GLO1    |
| 14604081 | 2-(3,4-dihydroxyphenyl)-5,7-dihydroxy-6-(3-methylbut-2-enyl)chromone | GPR35   |

|          |                                                                      |       |
|----------|----------------------------------------------------------------------|-------|
| 14604081 | 2-(3,4-dihydroxyphenyl)-5,7-dihydroxy-6-(3-methylbut-2-enyl)chromone | GSK3B |
| 14604081 | 2-(3,4-dihydroxyphenyl)-5,7-dihydroxy-6-(3-methylbut-2-enyl)chromone | IGF1R |
| 14604081 | 2-(3,4-dihydroxyphenyl)-5,7-dihydroxy-6-(3-methylbut-2-enyl)chromone | INSR  |
| 14604081 | 2-(3,4-dihydroxyphenyl)-5,7-dihydroxy-6-(3-methylbut-2-enyl)chromone | KDM4E |
| 14604081 | 2-(3,4-dihydroxyphenyl)-5,7-dihydroxy-6-(3-methylbut-2-enyl)chromone | KDR   |
| 14604081 | 2-(3,4-dihydroxyphenyl)-5,7-dihydroxy-6-(3-methylbut-2-enyl)chromone | MAOA  |
| 14604081 | 2-(3,4-dihydroxyphenyl)-5,7-dihydroxy-6-(3-methylbut-2-enyl)chromone | MAPT  |
| 14604081 | 2-(3,4-dihydroxyphenyl)-5,7-dihydroxy-6-(3-methylbut-2-enyl)chromone | MET   |
| 14604081 | 2-(3,4-dihydroxyphenyl)-5,7-dihydroxy-6-(3-methylbut-2-enyl)chromone | MMP12 |
| 14604081 | 2-(3,4-dihydroxyphenyl)-5,7-dihydroxy-6-(3-methylbut-2-enyl)chromone | MMP13 |
| 14604081 | 2-(3,4-dihydroxyphenyl)-5,7-dihydroxy-6-(3-methylbut-2-enyl)chromone | MMP2  |
| 14604081 | 2-(3,4-dihydroxyphenyl)-5,7-dihydroxy-6-(3-methylbut-2-enyl)chromone | MMP3  |
| 14604081 | 2-(3,4-dihydroxyphenyl)-5,7-dihydroxy-6-(3-methylbut-2-enyl)chromone | MMP9  |
| 14604081 | 2-(3,4-dihydroxyphenyl)-5,7-dihydroxy-6-(3-methylbut-2-enyl)chromone | MPO   |

|          |                                                                      |         |
|----------|----------------------------------------------------------------------|---------|
| 14604081 | 2-(3,4-dihydroxyphenyl)-5,7-dihydroxy-6-(3-methylbut-2-enyl)chromone | MYLK    |
| 14604081 | 2-(3,4-dihydroxyphenyl)-5,7-dihydroxy-6-(3-methylbut-2-enyl)chromone | NAE1    |
| 14604081 | 2-(3,4-dihydroxyphenyl)-5,7-dihydroxy-6-(3-methylbut-2-enyl)chromone | NEK2    |
| 14604081 | 2-(3,4-dihydroxyphenyl)-5,7-dihydroxy-6-(3-methylbut-2-enyl)chromone | NEK6    |
| 14604081 | 2-(3,4-dihydroxyphenyl)-5,7-dihydroxy-6-(3-methylbut-2-enyl)chromone | NOX4    |
| 14604081 | 2-(3,4-dihydroxyphenyl)-5,7-dihydroxy-6-(3-methylbut-2-enyl)chromone | NUAK1   |
| 14604081 | 2-(3,4-dihydroxyphenyl)-5,7-dihydroxy-6-(3-methylbut-2-enyl)chromone | PARP1   |
| 14604081 | 2-(3,4-dihydroxyphenyl)-5,7-dihydroxy-6-(3-methylbut-2-enyl)chromone | PDE5A   |
| 14604081 | 2-(3,4-dihydroxyphenyl)-5,7-dihydroxy-6-(3-methylbut-2-enyl)chromone | PFKFB3  |
| 14604081 | 2-(3,4-dihydroxyphenyl)-5,7-dihydroxy-6-(3-methylbut-2-enyl)chromone | PIK3CG  |
| 14604081 | 2-(3,4-dihydroxyphenyl)-5,7-dihydroxy-6-(3-methylbut-2-enyl)chromone | PIK3R1  |
| 14604081 | 2-(3,4-dihydroxyphenyl)-5,7-dihydroxy-6-(3-methylbut-2-enyl)chromone | PIM1    |
| 14604081 | 2-(3,4-dihydroxyphenyl)-5,7-dihydroxy-6-(3-methylbut-2-enyl)chromone | PKN1    |
| 14604081 | 2-(3,4-dihydroxyphenyl)-5,7-dihydroxy-6-(3-methylbut-2-enyl)chromone | PLA2G1B |

|          |                                                                      |         |
|----------|----------------------------------------------------------------------|---------|
| 14604081 | 2-(3,4-dihydroxyphenyl)-5,7-dihydroxy-6-(3-methylbut-2-enyl)chromone | PLA2G2A |
| 14604081 | 2-(3,4-dihydroxyphenyl)-5,7-dihydroxy-6-(3-methylbut-2-enyl)chromone | PLG     |
| 14604081 | 2-(3,4-dihydroxyphenyl)-5,7-dihydroxy-6-(3-methylbut-2-enyl)chromone | PLK1    |
| 14604081 | 2-(3,4-dihydroxyphenyl)-5,7-dihydroxy-6-(3-methylbut-2-enyl)chromone | PPARG   |
| 14604081 | 2-(3,4-dihydroxyphenyl)-5,7-dihydroxy-6-(3-methylbut-2-enyl)chromone | PTK2    |
| 14604081 | 2-(3,4-dihydroxyphenyl)-5,7-dihydroxy-6-(3-methylbut-2-enyl)chromone | PTPN1   |
| 14604081 | 2-(3,4-dihydroxyphenyl)-5,7-dihydroxy-6-(3-methylbut-2-enyl)chromone | PTPRS   |
| 14604081 | 2-(3,4-dihydroxyphenyl)-5,7-dihydroxy-6-(3-methylbut-2-enyl)chromone | PYGL    |
| 14604081 | 2-(3,4-dihydroxyphenyl)-5,7-dihydroxy-6-(3-methylbut-2-enyl)chromone | ST6GAL1 |
| 14604081 | 2-(3,4-dihydroxyphenyl)-5,7-dihydroxy-6-(3-methylbut-2-enyl)chromone | SYK     |
| 14604081 | 2-(3,4-dihydroxyphenyl)-5,7-dihydroxy-6-(3-methylbut-2-enyl)chromone | TNKS    |
| 14604081 | 2-(3,4-dihydroxyphenyl)-5,7-dihydroxy-6-(3-methylbut-2-enyl)chromone | TNKS2   |
| 14604081 | 2-(3,4-dihydroxyphenyl)-5,7-dihydroxy-6-(3-methylbut-2-enyl)chromone | TOP1    |
| 14604081 | 2-(3,4-dihydroxyphenyl)-5,7-dihydroxy-6-(3-methylbut-2-enyl)chromone | TOP2A   |

|          |                                                                      |         |
|----------|----------------------------------------------------------------------|---------|
| 14604081 | 2-(3,4-dihydroxyphenyl)-5,7-dihydroxy-6-(3-methylbut-2-enyl)chromone | TTR     |
| 14604081 | 2-(3,4-dihydroxyphenyl)-5,7-dihydroxy-6-(3-methylbut-2-enyl)chromone | TYR     |
| 14604081 | 2-(3,4-dihydroxyphenyl)-5,7-dihydroxy-6-(3-methylbut-2-enyl)chromone | XDH     |
| 480787   | Glycyrin                                                             | ACHE    |
| 480787   | Glycyrin                                                             | ACVR1   |
| 480787   | Glycyrin                                                             | ADAM17  |
| 480787   | Glycyrin                                                             | ADORA2B |
| 480787   | Glycyrin                                                             | AKR1B10 |
| 480787   | Glycyrin                                                             | ALDH2   |
| 480787   | Glycyrin                                                             | AURKA   |
| 480787   | Glycyrin                                                             | AVPR2   |
| 480787   | Glycyrin                                                             | BACE2   |
| 480787   | Glycyrin                                                             | BMP1    |
| 480787   | Glycyrin                                                             | CA12    |
| 480787   | Glycyrin                                                             | CES1    |
| 480787   | Glycyrin                                                             | CES2    |
| 480787   | Glycyrin                                                             | CHRM3   |
| 480787   | Glycyrin                                                             | CHRNA7  |
| 480787   | Glycyrin                                                             | COMT    |
| 480787   | Glycyrin                                                             | CSNK1A1 |
| 480787   | Glycyrin                                                             | CTSB    |
| 480787   | Glycyrin                                                             | CTSL    |
| 480787   | Glycyrin                                                             | CYP19A1 |
| 480787   | Glycyrin                                                             | DPP4    |
| 480787   | Glycyrin                                                             | DUSP3   |
| 480787   | Glycyrin                                                             | EP300   |
| 480787   | Glycyrin                                                             | EPHX2   |
| 480787   | Glycyrin                                                             | ERN1    |
| 480787   | Glycyrin                                                             | F3      |
| 480787   | Glycyrin                                                             | FKBP1A  |
| 480787   | Glycyrin                                                             | FLT1    |
| 480787   | Glycyrin                                                             | FLT3    |
| 480787   | Glycyrin                                                             | FNTA    |
| 480787   | Glycyrin                                                             | FNTB    |
| 480787   | Glycyrin                                                             | GCGR    |
| 480787   | Glycyrin                                                             | HDAC1   |
| 480787   | Glycyrin                                                             | HDAC10  |
| 480787   | Glycyrin                                                             | HDAC11  |

|        |          |         |
|--------|----------|---------|
| 480787 | Glycyrin | HDAC2   |
| 480787 | Glycyrin | HDAC3   |
| 480787 | Glycyrin | HDAC3   |
| 480787 | Glycyrin | HDAC4   |
| 480787 | Glycyrin | HDAC5   |
| 480787 | Glycyrin | HDAC6   |
| 480787 | Glycyrin | HDAC7   |
| 480787 | Glycyrin | HDAC8   |
| 480787 | Glycyrin | HDAC9   |
| 480787 | Glycyrin | HPGD    |
| 480787 | Glycyrin | HPGDS   |
| 480787 | Glycyrin | HSD17B2 |
| 480787 | Glycyrin | HTR3A   |
| 480787 | Glycyrin | IKBKE   |
| 480787 | Glycyrin | KDR     |
| 480787 | Glycyrin | LIMK1   |
| 480787 | Glycyrin | LIMK2   |
| 480787 | Glycyrin | MAOB    |
| 480787 | Glycyrin | MAPK14  |
| 480787 | Glycyrin | MELK    |
| 480787 | Glycyrin | MERTK   |
| 480787 | Glycyrin | MET     |
| 480787 | Glycyrin | MGLL    |
| 480787 | Glycyrin | MIF     |
| 480787 | Glycyrin | MMP1    |
| 480787 | Glycyrin | MMP13   |
| 480787 | Glycyrin | MMP2    |
| 480787 | Glycyrin | MMP3    |
| 480787 | Glycyrin | MMP9    |
| 480787 | Glycyrin | MPI     |
| 480787 | Glycyrin | NCOR1   |
| 480787 | Glycyrin | NCOR2   |
| 480787 | Glycyrin | NOS2    |
| 480787 | Glycyrin | ODC1    |
| 480787 | Glycyrin | PDE4A   |
| 480787 | Glycyrin | PDE4B   |
| 480787 | Glycyrin | PDE4C   |
| 480787 | Glycyrin | PDE4D   |
| 480787 | Glycyrin | PDE7A   |
| 480787 | Glycyrin | PDK1    |
| 480787 | Glycyrin | PIK3CA  |
| 480787 | Glycyrin | PLEC    |
| 480787 | Glycyrin | PLK1    |
| 480787 | Glycyrin | PPARG   |

|        |               |         |
|--------|---------------|---------|
| 480787 | Glycyrin      | PRF1    |
| 480787 | Glycyrin      | PTAFR   |
| 480787 | Glycyrin      | PTPN1   |
| 480787 | Glycyrin      | ROCK1   |
| 480787 | Glycyrin      | ROCK2   |
| 480787 | Glycyrin      | RPS6KA3 |
| 480787 | Glycyrin      | S1PR1   |
| 480787 | Glycyrin      | S1PR3   |
| 480787 | Glycyrin      | SCD     |
| 480787 | Glycyrin      | SF3B3   |
| 480787 | Glycyrin      | SLC29A1 |
| 480787 | Glycyrin      | SLC5A1  |
| 480787 | Glycyrin      | SREBF2  |
| 480787 | Glycyrin      | STK17B  |
| 480787 | Glycyrin      | SYK     |
| 480787 | Glycyrin      | TAOK1   |
| 480787 | Glycyrin      | TAOK3   |
| 480787 | Glycyrin      | TBK1    |
| 480787 | Glycyrin      | TBXA2R  |
| 480787 | Glycyrin      | TGFBR1  |
| 480787 | Glycyrin      | TLR9    |
| 480787 | Glycyrin      | TRPV1   |
| 480787 | Glycyrin      | XPO1    |
| 503731 | Licocoumarone | ABHD6   |
| 503731 | Licocoumarone | ACHE    |
| 503731 | Licocoumarone | ADRA2A  |
| 503731 | Licocoumarone | AGTR1   |
| 503731 | Licocoumarone | ALOX5AP |
| 503731 | Licocoumarone | APH1A   |
| 503731 | Licocoumarone | APH1B   |
| 503731 | Licocoumarone | BACE1   |
| 503731 | Licocoumarone | BACE2   |
| 503731 | Licocoumarone | BCHE    |
| 503731 | Licocoumarone | CASP3   |
| 503731 | Licocoumarone | CASP7   |
| 503731 | Licocoumarone | CCNB1   |
| 503731 | Licocoumarone | CCNE1   |
| 503731 | Licocoumarone | CCNE1   |
| 503731 | Licocoumarone | CCNE2   |
| 503731 | Licocoumarone | CDC25A  |
| 503731 | Licocoumarone | CDC25B  |
| 503731 | Licocoumarone | CDK1    |
| 503731 | Licocoumarone | CDK2    |
| 503731 | Licocoumarone | CDK2    |



|        |               |          |
|--------|---------------|----------|
| 503731 | Licocoumarone | CHEK1    |
| 503731 | Licocoumarone | CXCR2    |
| 503731 | Licocoumarone | CYP17A1  |
| 503731 | Licocoumarone | DUT      |
| 503731 | Licocoumarone | EDNRA    |
| 503731 | Licocoumarone | EDNRB    |
| 503731 | Licocoumarone | EPHA2    |
| 503731 | Licocoumarone | ESR1     |
| 503731 | Licocoumarone | FAAH     |
| 503731 | Licocoumarone | FGFR1    |
| 503731 | Licocoumarone | FLT1     |
| 503731 | Licocoumarone | FNTA     |
| 503731 | Licocoumarone | FNTB     |
| 503731 | Licocoumarone | GCGR     |
| 503731 | Licocoumarone | GRM5     |
| 503731 | Licocoumarone | HIF1A    |
| 503731 | Licocoumarone | HPGD     |
| 503731 | Licocoumarone | HPSE     |
| 503731 | Licocoumarone | HSP90AB1 |
| 503731 | Licocoumarone | HTR6     |
| 503731 | Licocoumarone | HTR7     |
| 503731 | Licocoumarone | IMPDH2   |
| 503731 | Licocoumarone | JAK1     |
| 503731 | Licocoumarone | JAK3     |
| 503731 | Licocoumarone | LRRK2    |
| 503731 | Licocoumarone | MGLL     |
| 503731 | Licocoumarone | MKNK1    |
| 503731 | Licocoumarone | MMP1     |
| 503731 | Licocoumarone | MMP7     |
| 503731 | Licocoumarone | MMP8     |
| 503731 | Licocoumarone | NCSTN    |
| 503731 | Licocoumarone | NR3C2    |
| 503731 | Licocoumarone | P2RX3    |
| 503731 | Licocoumarone | PGR      |
| 503731 | Licocoumarone | PIK3CA   |
| 503731 | Licocoumarone | PPARG    |
| 503731 | Licocoumarone | PRKCA    |
| 503731 | Licocoumarone | PSEN1    |
| 503731 | Licocoumarone | PSEN2    |
| 503731 | Licocoumarone | PSENEN   |
| 503731 | Licocoumarone | RASGRP3  |
| 503731 | Licocoumarone | ROCK2    |
| 503731 | Licocoumarone | RPS6KA1  |
| 503731 | Licocoumarone | SCN9A    |

|         |                |          |
|---------|----------------|----------|
| 503731  | Licocoumarone  | SLC5A1   |
| 503731  | Licocoumarone  | SLC6A2   |
| 503731  | Licocoumarone  | WEE1     |
| 5281789 | Licoisoflavone | ABCB1    |
| 5281789 | Licoisoflavone | ABCG2    |
| 5281789 | Licoisoflavone | ACHE     |
| 5281789 | Licoisoflavone | ADORA2A  |
| 5281789 | Licoisoflavone | ADRB1    |
| 5281789 | Licoisoflavone | ADRB2    |
| 5281789 | Licoisoflavone | ALDH2    |
| 5281789 | Licoisoflavone | AR       |
| 5281789 | Licoisoflavone | BCL2L1   |
| 5281789 | Licoisoflavone | CA12     |
| 5281789 | Licoisoflavone | CHEK2    |
| 5281789 | Licoisoflavone | CYP19A1  |
| 5281789 | Licoisoflavone | EGFR     |
| 5281789 | Licoisoflavone | ESR1     |
| 5281789 | Licoisoflavone | ESRRA    |
| 5281789 | Licoisoflavone | ESRRB    |
| 5281789 | Licoisoflavone | GCGR     |
| 5281789 | Licoisoflavone | HSD17B1  |
| 5281789 | Licoisoflavone | HSD17B2  |
| 5281789 | Licoisoflavone | HSP90AA1 |
| 5281789 | Licoisoflavone | HSP90AB1 |
| 5281789 | Licoisoflavone | HTR2A    |
| 5281789 | Licoisoflavone | IL2      |
| 5281789 | Licoisoflavone | MAOA     |
| 5281789 | Licoisoflavone | MGAM     |
| 5281789 | Licoisoflavone | MIF      |
| 5281789 | Licoisoflavone | NOX4     |
| 5281789 | Licoisoflavone | PTPN1    |
| 5281789 | Licoisoflavone | PTPRS    |
| 5281789 | Licoisoflavone | RELA     |
| 5281789 | Licoisoflavone | TBXAS1   |
| 5281789 | Licoisoflavone | TYR      |
| 5281789 | Licoisoflavone | XDH      |
| 5318869 | Jaranol        | ABCB1    |
| 5318869 | Jaranol        | ABCC1    |
| 5318869 | Jaranol        | ABCG2    |
| 5318869 | Jaranol        | ACHE     |
| 5318869 | Jaranol        | ADORA1   |
| 5318869 | Jaranol        | ADORA2A  |
| 5318869 | Jaranol        | ADORA3   |
| 5318869 | Jaranol        | AHR      |

|         |         |         |
|---------|---------|---------|
| 5318869 | Jaranol | AKR1B1  |
| 5318869 | Jaranol | AKR1B10 |
| 5318869 | Jaranol | AKR1C1  |
| 5318869 | Jaranol | AKT1    |
| 5318869 | Jaranol | ALK     |
| 5318869 | Jaranol | ALOX15  |
| 5318869 | Jaranol | ALOX5   |
| 5318869 | Jaranol | AMY1A   |
| 5318869 | Jaranol | APEX1   |
| 5318869 | Jaranol | APP     |
| 5318869 | Jaranol | AR      |
| 5318869 | Jaranol | ARG1    |
| 5318869 | Jaranol | AURKB   |
| 5318869 | Jaranol | AVPR2   |
| 5318869 | Jaranol | AXL     |
| 5318869 | Jaranol | BACE1   |
| 5318869 | Jaranol | BCHE    |
| 5318869 | Jaranol | CA1     |
| 5318869 | Jaranol | CA12    |
| 5318869 | Jaranol | CA13    |
| 5318869 | Jaranol | CA14    |
| 5318869 | Jaranol | CA2     |
| 5318869 | Jaranol | CA3     |
| 5318869 | Jaranol | CA4     |
| 5318869 | Jaranol | CA5A    |
| 5318869 | Jaranol | CA6     |
| 5318869 | Jaranol | CA7     |
| 5318869 | Jaranol | CA9     |
| 5318869 | Jaranol | CAMK2B  |
| 5318869 | Jaranol | CCNB1   |
| 5318869 | Jaranol | CCNB2   |
| 5318869 | Jaranol | CCNB3   |
| 5318869 | Jaranol | CDK1    |
| 5318869 | Jaranol | CDK1    |
| 5318869 | Jaranol | CDK2    |
| 5318869 | Jaranol | CDK5    |
| 5318869 | Jaranol | CDK5R1  |
| 5318869 | Jaranol | CDK6    |
| 5318869 | Jaranol | CSNK2A1 |
| 5318869 | Jaranol | CYP19A1 |
| 5318869 | Jaranol | CYP1B1  |
| 5318869 | Jaranol | DAPK1   |
| 5318869 | Jaranol | DRD4    |
| 5318869 | Jaranol | EGFR    |

|         |         |          |
|---------|---------|----------|
| 5318869 | Jaranol | ESR1     |
| 5318869 | Jaranol | ESR2     |
| 5318869 | Jaranol | ESRRA    |
| 5318869 | Jaranol | F2       |
| 5318869 | Jaranol | FLT3     |
| 5318869 | Jaranol | GLO1     |
| 5318869 | Jaranol | GPR35    |
| 5318869 | Jaranol | GSK3B    |
| 5318869 | Jaranol | HSD17B1  |
| 5318869 | Jaranol | HSD17B2  |
| 5318869 | Jaranol | IGF1R    |
| 5318869 | Jaranol | KDM4E    |
| 5318869 | Jaranol | KDR      |
| 5318869 | Jaranol | KIT      |
| 5318869 | Jaranol | MAOA     |
| 5318869 | Jaranol | MCL1     |
| 5318869 | Jaranol | MET      |
| 5318869 | Jaranol | MMP12    |
| 5318869 | Jaranol | MMP13    |
| 5318869 | Jaranol | MMP2     |
| 5318869 | Jaranol | MMP3     |
| 5318869 | Jaranol | MMP9     |
| 5318869 | Jaranol | MPG      |
| 5318869 | Jaranol | MYLK     |
| 5318869 | Jaranol | NAE1     |
| 5318869 | Jaranol | NEK6     |
| 5318869 | Jaranol | NOS2     |
| 5318869 | Jaranol | NOX4     |
| 5318869 | Jaranol | NUAK1    |
| 5318869 | Jaranol | ODC1     |
| 5318869 | Jaranol | OPRD1    |
| 5318869 | Jaranol | OPRM1    |
| 5318869 | Jaranol | PARP1    |
| 5318869 | Jaranol | PIK3CG   |
| 5318869 | Jaranol | PIK3R1   |
| 5318869 | Jaranol | PIM1     |
| 5318869 | Jaranol | PLG      |
| 5318869 | Jaranol | PLK1     |
| 5318869 | Jaranol | PTGS2    |
| 5318869 | Jaranol | PTK2     |
| 5318869 | Jaranol | PTPN1    |
| 5318869 | Jaranol | PTPRS    |
| 5318869 | Jaranol | SLC22A12 |
| 5318869 | Jaranol | SRC      |

|         |                  |         |
|---------|------------------|---------|
| 5318869 | Jaranol          | SYK     |
| 5318869 | Jaranol          | TAS2R31 |
| 5318869 | Jaranol          | TERT    |
| 5318869 | Jaranol          | TNKS    |
| 5318869 | Jaranol          | TNKS2   |
| 5318869 | Jaranol          | TOP2A   |
| 5318869 | Jaranol          | TYR     |
| 5318869 | Jaranol          | XDH     |
| 392443  | licoisoflavanone | ABAT    |
| 392443  | licoisoflavanone | ABL1    |
| 392443  | licoisoflavanone | ADAM17  |
| 392443  | licoisoflavanone | ADAMTS4 |
| 392443  | licoisoflavanone | ADAMTS5 |
| 392443  | licoisoflavanone | ADORA2A |
| 392443  | licoisoflavanone | ADORA2B |
| 392443  | licoisoflavanone | ALK     |
| 392443  | licoisoflavanone | ALPG    |
| 392443  | licoisoflavanone | ALPL    |
| 392443  | licoisoflavanone | AURKA   |
| 392443  | licoisoflavanone | AURKB   |
| 392443  | licoisoflavanone | BMP1    |
| 392443  | licoisoflavanone | BRAF    |
| 392443  | licoisoflavanone | CCNB1   |
| 392443  | licoisoflavanone | CCNB1   |
| 392443  | licoisoflavanone | CCNB2   |
| 392443  | licoisoflavanone | CCNB3   |
| 392443  | licoisoflavanone | CCND1   |
| 392443  | licoisoflavanone | CCND1   |
| 392443  | licoisoflavanone | CCND2   |
| 392443  | licoisoflavanone | CCND3   |
| 392443  | licoisoflavanone | CCNE1   |
| 392443  | licoisoflavanone | CCNE2   |
| 392443  | licoisoflavanone | CDC7    |
| 392443  | licoisoflavanone | CDK1    |
| 392443  | licoisoflavanone | CDK1    |
| 392443  | licoisoflavanone | CDK2    |
| 392443  | licoisoflavanone | CDK4    |
| 392443  | licoisoflavanone | CDK4    |
| 392443  | licoisoflavanone | CDK4    |
| 392443  | licoisoflavanone | CHEK1   |
| 392443  | licoisoflavanone | CHRNA7  |
| 392443  | licoisoflavanone | CSNK1G1 |
| 392443  | licoisoflavanone | CTSD    |
| 392443  | licoisoflavanone | CXCR1   |
| 392443  | licoisoflavanone | CXCR2   |

|        |                  |         |
|--------|------------------|---------|
| 392443 | licoisoflavanone | DBF4    |
| 392443 | licoisoflavanone | DNM1    |
| 392443 | licoisoflavanone | EP300   |
| 392443 | licoisoflavanone | EPHB2   |
| 392443 | licoisoflavanone | EPHB4   |
| 392443 | licoisoflavanone | ERN1    |
| 392443 | licoisoflavanone | ESR1    |
| 392443 | licoisoflavanone | ESR2    |
| 392443 | licoisoflavanone | EZR     |
| 392443 | licoisoflavanone | F10     |
| 392443 | licoisoflavanone | FGFR2   |
| 392443 | licoisoflavanone | FLT1    |
| 392443 | licoisoflavanone | FLT3    |
| 392443 | licoisoflavanone | GRM4    |
| 392443 | licoisoflavanone | GSK3A   |
| 392443 | licoisoflavanone | HCK     |
| 392443 | licoisoflavanone | HDAC10  |
| 392443 | licoisoflavanone | HDAC11  |
| 392443 | licoisoflavanone | HDAC3   |
| 392443 | licoisoflavanone | HDAC3   |
| 392443 | licoisoflavanone | HDAC5   |
| 392443 | licoisoflavanone | HDAC7   |
| 392443 | licoisoflavanone | HDAC9   |
| 392443 | licoisoflavanone | HSD11B1 |
| 392443 | licoisoflavanone | HSD17B2 |
| 392443 | licoisoflavanone | HSD17B3 |
| 392443 | licoisoflavanone | IMPDH1  |
| 392443 | licoisoflavanone | IMPDH2  |
| 392443 | licoisoflavanone | JAK3    |
| 392443 | licoisoflavanone | KDM1A   |
| 392443 | licoisoflavanone | LCK     |
| 392443 | licoisoflavanone | MAOB    |
| 392443 | licoisoflavanone | MAP2K1  |
| 392443 | licoisoflavanone | MAPK1   |
| 392443 | licoisoflavanone | MAPK14  |
| 392443 | licoisoflavanone | MARK1   |
| 392443 | licoisoflavanone | MME     |
| 392443 | licoisoflavanone | MMP14   |
| 392443 | licoisoflavanone | MMP2    |
| 392443 | licoisoflavanone | MMP7    |
| 392443 | licoisoflavanone | MMP8    |
| 392443 | licoisoflavanone | MTOR    |
| 392443 | licoisoflavanone | MYLK    |
| 392443 | licoisoflavanone | NCOR1   |

|          |                  |         |
|----------|------------------|---------|
| 392443   | licoisoflavanone | NCOR2   |
| 392443   | licoisoflavanone | ODC1    |
| 392443   | licoisoflavanone | PARP1   |
| 392443   | licoisoflavanone | PDE4A   |
| 392443   | licoisoflavanone | PDE4B   |
| 392443   | licoisoflavanone | PDE4C   |
| 392443   | licoisoflavanone | PDE7A   |
| 392443   | licoisoflavanone | PDGFRB  |
| 392443   | licoisoflavanone | PDPK1   |
| 392443   | licoisoflavanone | PI4KB   |
| 392443   | licoisoflavanone | PIK3CB  |
| 392443   | licoisoflavanone | PIK3CD  |
| 392443   | licoisoflavanone | PIK3CG  |
| 392443   | licoisoflavanone | PIK3R1  |
| 392443   | licoisoflavanone | PIM1    |
| 392443   | licoisoflavanone | PIM2    |
| 392443   | licoisoflavanone | PLAA    |
| 392443   | licoisoflavanone | PLK1    |
| 392443   | licoisoflavanone | PRKDC   |
| 392443   | licoisoflavanone | PTK6    |
| 392443   | licoisoflavanone | PTPN1   |
| 392443   | licoisoflavanone | RAF1    |
| 392443   | licoisoflavanone | RET     |
| 392443   | licoisoflavanone | ROCK1   |
| 392443   | licoisoflavanone | RPS6KA1 |
| 392443   | licoisoflavanone | RPS6KA2 |
| 392443   | licoisoflavanone | SPHK1   |
| 392443   | licoisoflavanone | SPHK2   |
| 392443   | licoisoflavanone | SYK     |
| 392443   | licoisoflavanone | TRPM8   |
| 392443   | licoisoflavanone | TUBB1   |
| 392443   | licoisoflavanone | VCP     |
| 392443   | licoisoflavanone | WEE1    |
| 10336244 | shinpterocarpin  | ABL1    |
| 10336244 | shinpterocarpin  | ADORA2B |
| 10336244 | shinpterocarpin  | AKT1    |
| 10336244 | shinpterocarpin  | ALDH2   |
| 10336244 | shinpterocarpin  | AR      |
| 10336244 | shinpterocarpin  | AURKA   |
| 10336244 | shinpterocarpin  | BAD     |
| 10336244 | shinpterocarpin  | BLK     |
| 10336244 | shinpterocarpin  | CASK    |
| 10336244 | shinpterocarpin  | CCNB1   |
| 10336244 | shinpterocarpin  | CCNB2   |

|          |                 |         |
|----------|-----------------|---------|
| 10336244 | shinpterocarpin | CCNB3   |
| 10336244 | shinpterocarpin | CDK1    |
| 10336244 | shinpterocarpin | CDK1    |
| 10336244 | shinpterocarpin | CDK2    |
| 10336244 | shinpterocarpin | CDK4    |
| 10336244 | shinpterocarpin | CDK5    |
| 10336244 | shinpterocarpin | CDK5R1  |
| 10336244 | shinpterocarpin | CHEK1   |
| 10336244 | shinpterocarpin | CLK3    |
| 10336244 | shinpterocarpin | COMT    |
| 10336244 | shinpterocarpin | CSF1R   |
| 10336244 | shinpterocarpin | CSNK1D  |
| 10336244 | shinpterocarpin | CSNK1G1 |
| 10336244 | shinpterocarpin | CTSS    |
| 10336244 | shinpterocarpin | DAPK3   |
| 10336244 | shinpterocarpin | DPP4    |
| 10336244 | shinpterocarpin | DSTYK   |
| 10336244 | shinpterocarpin | EGFR    |
| 10336244 | shinpterocarpin | ELANE   |
| 10336244 | shinpterocarpin | EP300   |
| 10336244 | shinpterocarpin | EPHA2   |
| 10336244 | shinpterocarpin | EPHB4   |
| 10336244 | shinpterocarpin | ERBB2   |
| 10336244 | shinpterocarpin | ERN1    |
| 10336244 | shinpterocarpin | ESR1    |
| 10336244 | shinpterocarpin | ESR2    |
| 10336244 | shinpterocarpin | FLT1    |
| 10336244 | shinpterocarpin | FLT3    |
| 10336244 | shinpterocarpin | FLT4    |
| 10336244 | shinpterocarpin | FNTA    |
| 10336244 | shinpterocarpin | FNTB    |
| 10336244 | shinpterocarpin | FYN     |
| 10336244 | shinpterocarpin | GABRA5  |
| 10336244 | shinpterocarpin | GABRB3  |
| 10336244 | shinpterocarpin | GABRG2  |
| 10336244 | shinpterocarpin | GCGR    |
| 10336244 | shinpterocarpin | GRK7    |
| 10336244 | shinpterocarpin | GRM4    |
| 10336244 | shinpterocarpin | GSK3B   |
| 10336244 | shinpterocarpin | HCK     |
| 10336244 | shinpterocarpin | HDAC1   |
| 10336244 | shinpterocarpin | HIPK4   |
| 10336244 | shinpterocarpin | HPGDS   |
| 10336244 | shinpterocarpin | HSD17B2 |



|          |                 |         |
|----------|-----------------|---------|
| 10336244 | shinpterocarpin | HSD17B3 |
| 10336244 | shinpterocarpin | JAK3    |
| 10336244 | shinpterocarpin | LCK     |
| 10336244 | shinpterocarpin | LNPEP   |
| 10336244 | shinpterocarpin | LRRK2   |
| 10336244 | shinpterocarpin | LTA4H   |
| 10336244 | shinpterocarpin | MAP2K3  |
| 10336244 | shinpterocarpin | MAPK1   |
| 10336244 | shinpterocarpin | MAPK14  |
| 10336244 | shinpterocarpin | MBD2    |
| 10336244 | shinpterocarpin | MERTK   |
| 10336244 | shinpterocarpin | MIF     |
| 10336244 | shinpterocarpin | MTOR    |
| 10336244 | shinpterocarpin | MYLK    |
| 10336244 | shinpterocarpin | NR1D1   |
| 10336244 | shinpterocarpin | NR4A1   |
| 10336244 | shinpterocarpin | PARP1   |
| 10336244 | shinpterocarpin | PDE3A   |
| 10336244 | shinpterocarpin | PDE4B   |
| 10336244 | shinpterocarpin | PDE5A   |
| 10336244 | shinpterocarpin | PDE7A   |
| 10336244 | shinpterocarpin | PDGFRA  |
| 10336244 | shinpterocarpin | PDGFRA  |
| 10336244 | shinpterocarpin | PDGFRB  |
| 10336244 | shinpterocarpin | PDGFRB  |
| 10336244 | shinpterocarpin | PFKFB3  |
| 10336244 | shinpterocarpin | PHKG2   |
| 10336244 | shinpterocarpin | PI4KB   |
| 10336244 | shinpterocarpin | PIK3C2G |
| 10336244 | shinpterocarpin | PIK3CB  |
| 10336244 | shinpterocarpin | PIK3CD  |
| 10336244 | shinpterocarpin | PIK3CG  |
| 10336244 | shinpterocarpin | PIM1    |
| 10336244 | shinpterocarpin | PIM2    |
| 10336244 | shinpterocarpin | PIM3    |
| 10336244 | shinpterocarpin | PIP4K2C |
| 10336244 | shinpterocarpin | PIP5K1C |
| 10336244 | shinpterocarpin | PLAA    |
| 10336244 | shinpterocarpin | PLK1    |
| 10336244 | shinpterocarpin | PRKDC   |
| 10336244 | shinpterocarpin | PTAFR   |
| 10336244 | shinpterocarpin | PTPN1   |
| 10336244 | shinpterocarpin | RET     |
| 10336244 | shinpterocarpin | RPS6KA3 |

|          |                                                                                           |         |
|----------|-------------------------------------------------------------------------------------------|---------|
| 10336244 | shinpterocarpin                                                                           | SPHK1   |
| 10336244 | shinpterocarpin                                                                           | SPHK2   |
| 10336244 | shinpterocarpin                                                                           | SREBF2  |
| 10336244 | shinpterocarpin                                                                           | SYK     |
| 10336244 | shinpterocarpin                                                                           | TAOK2   |
| 10336244 | shinpterocarpin                                                                           | TLR9    |
| 10336244 | shinpterocarpin                                                                           | VCP     |
| 10336244 | shinpterocarpin                                                                           | WEE1    |
| 10336244 | shinpterocarpin                                                                           | YES1    |
| 11267805 | (E)-3-[3,4-dihydroxy-5-(3-methylbut-2-enyl)phenyl]-1-(2,4-dihydroxyphenyl)prop-2-en-1-one | ABCB1   |
| 11267805 | (E)-3-[3,4-dihydroxy-5-(3-methylbut-2-enyl)phenyl]-1-(2,4-dihydroxyphenyl)prop-2-en-1-one | ABCG2   |
| 11267805 | (E)-3-[3,4-dihydroxy-5-(3-methylbut-2-enyl)phenyl]-1-(2,4-dihydroxyphenyl)prop-2-en-1-one | ADAM17  |
| 11267805 | (E)-3-[3,4-dihydroxy-5-(3-methylbut-2-enyl)phenyl]-1-(2,4-dihydroxyphenyl)prop-2-en-1-one | ADAMTS4 |
| 11267805 | (E)-3-[3,4-dihydroxy-5-(3-methylbut-2-enyl)phenyl]-1-(2,4-dihydroxyphenyl)prop-2-en-1-one | ADAMTS5 |
| 11267805 | (E)-3-[3,4-dihydroxy-5-(3-methylbut-2-enyl)phenyl]-1-(2,4-dihydroxyphenyl)prop-2-en-1-one | AKR1B1  |
| 11267805 | (E)-3-[3,4-dihydroxy-5-(3-methylbut-2-enyl)phenyl]-1-(2,4-dihydroxyphenyl)prop-2-en-1-one | AKT2    |
| 11267805 | (E)-3-[3,4-dihydroxy-5-(3-methylbut-2-enyl)phenyl]-1-(2,4-dihydroxyphenyl)prop-2-en-1-one | ALDH2   |
| 11267805 | (E)-3-[3,4-dihydroxy-5-(3-methylbut-2-enyl)phenyl]-1-                                     | ALOX5   |

|          |                                                                                                                                   |        |
|----------|-----------------------------------------------------------------------------------------------------------------------------------|--------|
| 11267805 | (2,4-dihydroxyphenyl)prop-2-en-1-one<br>(E)-3-[3,4-dihydroxy-5-(3-methylbut-2-enyl)phenyl]-1-(2,4-dihydroxyphenyl)prop-2-en-1-one | APP    |
| 11267805 | (E)-3-[3,4-dihydroxy-5-(3-methylbut-2-enyl)phenyl]-1-(2,4-dihydroxyphenyl)prop-2-en-1-one                                         | AR     |
| 11267805 | (E)-3-[3,4-dihydroxy-5-(3-methylbut-2-enyl)phenyl]-1-(2,4-dihydroxyphenyl)prop-2-en-1-one                                         | AURKA  |
| 11267805 | (E)-3-[3,4-dihydroxy-5-(3-methylbut-2-enyl)phenyl]-1-(2,4-dihydroxyphenyl)prop-2-en-1-one                                         | BACE1  |
| 11267805 | (E)-3-[3,4-dihydroxy-5-(3-methylbut-2-enyl)phenyl]-1-(2,4-dihydroxyphenyl)prop-2-en-1-one                                         | BRAF   |
| 11267805 | (E)-3-[3,4-dihydroxy-5-(3-methylbut-2-enyl)phenyl]-1-(2,4-dihydroxyphenyl)prop-2-en-1-one                                         | CCNE1  |
| 11267805 | (E)-3-[3,4-dihydroxy-5-(3-methylbut-2-enyl)phenyl]-1-(2,4-dihydroxyphenyl)prop-2-en-1-one                                         | CCNE1  |
| 11267805 | (E)-3-[3,4-dihydroxy-5-(3-methylbut-2-enyl)phenyl]-1-(2,4-dihydroxyphenyl)prop-2-en-1-one                                         | CDK2   |
| 11267805 | (E)-3-[3,4-dihydroxy-5-(3-methylbut-2-enyl)phenyl]-1-(2,4-dihydroxyphenyl)prop-2-en-1-one                                         | CDK3   |
| 11267805 | (E)-3-[3,4-dihydroxy-5-(3-methylbut-2-enyl)phenyl]-1-(2,4-dihydroxyphenyl)prop-2-en-1-one                                         | CHEK1  |
| 11267805 | (E)-3-[3,4-dihydroxy-5-(3-methylbut-2-enyl)phenyl]-1-                                                                             | CHRNA7 |

|          |                                                                                                                                   |         |
|----------|-----------------------------------------------------------------------------------------------------------------------------------|---------|
| 11267805 | (2,4-dihydroxyphenyl)prop-2-en-1-one<br>(E)-3-[3,4-dihydroxy-5-(3-methylbut-2-enyl)phenyl]-1-(2,4-dihydroxyphenyl)prop-2-en-1-one | CYP19A1 |
| 11267805 | (E)-3-[3,4-dihydroxy-5-(3-methylbut-2-enyl)phenyl]-1-(2,4-dihydroxyphenyl)prop-2-en-1-one                                         | DHODH   |
| 11267805 | (E)-3-[3,4-dihydroxy-5-(3-methylbut-2-enyl)phenyl]-1-(2,4-dihydroxyphenyl)prop-2-en-1-one                                         | DNM1    |
| 11267805 | (E)-3-[3,4-dihydroxy-5-(3-methylbut-2-enyl)phenyl]-1-(2,4-dihydroxyphenyl)prop-2-en-1-one                                         | DYRK1B  |
| 11267805 | (E)-3-[3,4-dihydroxy-5-(3-methylbut-2-enyl)phenyl]-1-(2,4-dihydroxyphenyl)prop-2-en-1-one                                         | EGFR    |
| 11267805 | (E)-3-[3,4-dihydroxy-5-(3-methylbut-2-enyl)phenyl]-1-(2,4-dihydroxyphenyl)prop-2-en-1-one                                         | ERN1    |
| 11267805 | (E)-3-[3,4-dihydroxy-5-(3-methylbut-2-enyl)phenyl]-1-(2,4-dihydroxyphenyl)prop-2-en-1-one                                         | ESR1    |
| 11267805 | (E)-3-[3,4-dihydroxy-5-(3-methylbut-2-enyl)phenyl]-1-(2,4-dihydroxyphenyl)prop-2-en-1-one                                         | ESR2    |
| 11267805 | (E)-3-[3,4-dihydroxy-5-(3-methylbut-2-enyl)phenyl]-1-(2,4-dihydroxyphenyl)prop-2-en-1-one                                         | ESRRA   |
| 11267805 | (E)-3-[3,4-dihydroxy-5-(3-methylbut-2-enyl)phenyl]-1-(2,4-dihydroxyphenyl)prop-2-en-1-one                                         | ESRRB   |
| 11267805 | (E)-3-[3,4-dihydroxy-5-(3-methylbut-2-enyl)phenyl]-1-                                                                             | F3      |

|          |                                                                                                                                   |       |
|----------|-----------------------------------------------------------------------------------------------------------------------------------|-------|
| 11267805 | (2,4-dihydroxyphenyl)prop-2-en-1-one<br>(E)-3-[3,4-dihydroxy-5-(3-methylbut-2-enyl)phenyl]-1-(2,4-dihydroxyphenyl)prop-2-en-1-one | FLT3  |
| 11267805 | (E)-3-[3,4-dihydroxy-5-(3-methylbut-2-enyl)phenyl]-1-(2,4-dihydroxyphenyl)prop-2-en-1-one                                         | GRM2  |
| 11267805 | (E)-3-[3,4-dihydroxy-5-(3-methylbut-2-enyl)phenyl]-1-(2,4-dihydroxyphenyl)prop-2-en-1-one                                         | GSK3A |
| 11267805 | (E)-3-[3,4-dihydroxy-5-(3-methylbut-2-enyl)phenyl]-1-(2,4-dihydroxyphenyl)prop-2-en-1-one                                         | HDAC1 |
| 11267805 | (E)-3-[3,4-dihydroxy-5-(3-methylbut-2-enyl)phenyl]-1-(2,4-dihydroxyphenyl)prop-2-en-1-one                                         | HDAC2 |
| 11267805 | (E)-3-[3,4-dihydroxy-5-(3-methylbut-2-enyl)phenyl]-1-(2,4-dihydroxyphenyl)prop-2-en-1-one                                         | HDAC3 |
| 11267805 | (E)-3-[3,4-dihydroxy-5-(3-methylbut-2-enyl)phenyl]-1-(2,4-dihydroxyphenyl)prop-2-en-1-one                                         | HDAC4 |
| 11267805 | (E)-3-[3,4-dihydroxy-5-(3-methylbut-2-enyl)phenyl]-1-(2,4-dihydroxyphenyl)prop-2-en-1-one                                         | HDAC5 |
| 11267805 | (E)-3-[3,4-dihydroxy-5-(3-methylbut-2-enyl)phenyl]-1-(2,4-dihydroxyphenyl)prop-2-en-1-one                                         | HDAC6 |
| 11267805 | (E)-3-[3,4-dihydroxy-5-(3-methylbut-2-enyl)phenyl]-1-(2,4-dihydroxyphenyl)prop-2-en-1-one                                         | HDAC7 |
| 11267805 | (E)-3-[3,4-dihydroxy-5-(3-methylbut-2-enyl)phenyl]-1-                                                                             | HDAC8 |

|          |                                                                                                                                   |          |
|----------|-----------------------------------------------------------------------------------------------------------------------------------|----------|
| 11267805 | (2,4-dihydroxyphenyl)prop-2-en-1-one<br>(E)-3-[3,4-dihydroxy-5-(3-methylbut-2-enyl)phenyl]-1-(2,4-dihydroxyphenyl)prop-2-en-1-one | HDAC9    |
| 11267805 | (E)-3-[3,4-dihydroxy-5-(3-methylbut-2-enyl)phenyl]-1-(2,4-dihydroxyphenyl)prop-2-en-1-one                                         | HPGDS    |
| 11267805 | (E)-3-[3,4-dihydroxy-5-(3-methylbut-2-enyl)phenyl]-1-(2,4-dihydroxyphenyl)prop-2-en-1-one                                         | HSD17B1  |
| 11267805 | (E)-3-[3,4-dihydroxy-5-(3-methylbut-2-enyl)phenyl]-1-(2,4-dihydroxyphenyl)prop-2-en-1-one                                         | HSD17B2  |
| 11267805 | (E)-3-[3,4-dihydroxy-5-(3-methylbut-2-enyl)phenyl]-1-(2,4-dihydroxyphenyl)prop-2-en-1-one                                         | HSP90AA1 |
| 11267805 | (E)-3-[3,4-dihydroxy-5-(3-methylbut-2-enyl)phenyl]-1-(2,4-dihydroxyphenyl)prop-2-en-1-one                                         | ILK      |
| 11267805 | (E)-3-[3,4-dihydroxy-5-(3-methylbut-2-enyl)phenyl]-1-(2,4-dihydroxyphenyl)prop-2-en-1-one                                         | MAOA     |
| 11267805 | (E)-3-[3,4-dihydroxy-5-(3-methylbut-2-enyl)phenyl]-1-(2,4-dihydroxyphenyl)prop-2-en-1-one                                         | MAOB     |
| 11267805 | (E)-3-[3,4-dihydroxy-5-(3-methylbut-2-enyl)phenyl]-1-(2,4-dihydroxyphenyl)prop-2-en-1-one                                         | MMP13    |
| 11267805 | (E)-3-[3,4-dihydroxy-5-(3-methylbut-2-enyl)phenyl]-1-(2,4-dihydroxyphenyl)prop-2-en-1-one                                         | MMP14    |
| 11267805 | (E)-3-[3,4-dihydroxy-5-(3-methylbut-2-enyl)phenyl]-1-                                                                             | MMP3     |

|          |                                                                                                                                   |       |
|----------|-----------------------------------------------------------------------------------------------------------------------------------|-------|
| 11267805 | (2,4-dihydroxyphenyl)prop-2-en-1-one<br>(E)-3-[3,4-dihydroxy-5-(3-methylbut-2-enyl)phenyl]-1-(2,4-dihydroxyphenyl)prop-2-en-1-one | MMP8  |
| 11267805 | (E)-3-[3,4-dihydroxy-5-(3-methylbut-2-enyl)phenyl]-1-(2,4-dihydroxyphenyl)prop-2-en-1-one                                         | NOS2  |
| 11267805 | (E)-3-[3,4-dihydroxy-5-(3-methylbut-2-enyl)phenyl]-1-(2,4-dihydroxyphenyl)prop-2-en-1-one                                         | NPY5R |
| 11267805 | (E)-3-[3,4-dihydroxy-5-(3-methylbut-2-enyl)phenyl]-1-(2,4-dihydroxyphenyl)prop-2-en-1-one                                         | ODC1  |
| 11267805 | (E)-3-[3,4-dihydroxy-5-(3-methylbut-2-enyl)phenyl]-1-(2,4-dihydroxyphenyl)prop-2-en-1-one                                         | PDK1  |
| 11267805 | (E)-3-[3,4-dihydroxy-5-(3-methylbut-2-enyl)phenyl]-1-(2,4-dihydroxyphenyl)prop-2-en-1-one                                         | PDPK1 |
| 11267805 | (E)-3-[3,4-dihydroxy-5-(3-methylbut-2-enyl)phenyl]-1-(2,4-dihydroxyphenyl)prop-2-en-1-one                                         | PLK1  |
| 11267805 | (E)-3-[3,4-dihydroxy-5-(3-methylbut-2-enyl)phenyl]-1-(2,4-dihydroxyphenyl)prop-2-en-1-one                                         | PRKCZ |
| 11267805 | (E)-3-[3,4-dihydroxy-5-(3-methylbut-2-enyl)phenyl]-1-(2,4-dihydroxyphenyl)prop-2-en-1-one                                         | PTGES |
| 11267805 | (E)-3-[3,4-dihydroxy-5-(3-methylbut-2-enyl)phenyl]-1-(2,4-dihydroxyphenyl)prop-2-en-1-one                                         | PTGS1 |
| 11267805 | (E)-3-[3,4-dihydroxy-5-(3-methylbut-2-enyl)phenyl]-1-                                                                             | PTGS2 |

|          |                                                                                                                                   |          |
|----------|-----------------------------------------------------------------------------------------------------------------------------------|----------|
| 11267805 | (2,4-dihydroxyphenyl)prop-2-en-1-one<br>(E)-3-[3,4-dihydroxy-5-(3-methylbut-2-enyl)phenyl]-1-(2,4-dihydroxyphenyl)prop-2-en-1-one | PTPN1    |
| 11267805 | (E)-3-[3,4-dihydroxy-5-(3-methylbut-2-enyl)phenyl]-1-(2,4-dihydroxyphenyl)prop-2-en-1-one                                         | QPCT     |
| 11267805 | (E)-3-[3,4-dihydroxy-5-(3-methylbut-2-enyl)phenyl]-1-(2,4-dihydroxyphenyl)prop-2-en-1-one                                         | RAF1     |
| 11267805 | (E)-3-[3,4-dihydroxy-5-(3-methylbut-2-enyl)phenyl]-1-(2,4-dihydroxyphenyl)prop-2-en-1-one                                         | ROCK2    |
| 11267805 | (E)-3-[3,4-dihydroxy-5-(3-methylbut-2-enyl)phenyl]-1-(2,4-dihydroxyphenyl)prop-2-en-1-one                                         | RPS6KB1  |
| 11267805 | (E)-3-[3,4-dihydroxy-5-(3-methylbut-2-enyl)phenyl]-1-(2,4-dihydroxyphenyl)prop-2-en-1-one                                         | SERPINE1 |
| 11267805 | (E)-3-[3,4-dihydroxy-5-(3-methylbut-2-enyl)phenyl]-1-(2,4-dihydroxyphenyl)prop-2-en-1-one                                         | SNCA     |
| 11267805 | (E)-3-[3,4-dihydroxy-5-(3-methylbut-2-enyl)phenyl]-1-(2,4-dihydroxyphenyl)prop-2-en-1-one                                         | TAS2R31  |
| 11267805 | (E)-3-[3,4-dihydroxy-5-(3-methylbut-2-enyl)phenyl]-1-(2,4-dihydroxyphenyl)prop-2-en-1-one                                         | TERT     |
| 11267805 | (E)-3-[3,4-dihydroxy-5-(3-methylbut-2-enyl)phenyl]-1-(2,4-dihydroxyphenyl)prop-2-en-1-one                                         | TNF      |
| 11267805 | (E)-3-[3,4-dihydroxy-5-(3-methylbut-2-enyl)phenyl]-1-                                                                             | TRPV1    |



|          |                                                                                                                                   |          |
|----------|-----------------------------------------------------------------------------------------------------------------------------------|----------|
| 11267805 | (2,4-dihydroxyphenyl)prop-2-en-1-one<br>(E)-3-[3,4-dihydroxy-5-(3-methylbut-2-enyl)phenyl]-1-(2,4-dihydroxyphenyl)prop-2-en-1-one | TUBB1    |
| 11267805 | (E)-3-[3,4-dihydroxy-5-(3-methylbut-2-enyl)phenyl]-1-(2,4-dihydroxyphenyl)prop-2-en-1-one                                         | TYR      |
| 11267805 | (E)-3-[3,4-dihydroxy-5-(3-methylbut-2-enyl)phenyl]-1-(2,4-dihydroxyphenyl)prop-2-en-1-one                                         | WEE1     |
| 122851   | licopyranocoumarin                                                                                                                | ACVRL1   |
| 122851   | licopyranocoumarin                                                                                                                | ADORA3   |
| 122851   | licopyranocoumarin                                                                                                                | AKT1     |
| 122851   | licopyranocoumarin                                                                                                                | ALOX5AP  |
| 122851   | licopyranocoumarin                                                                                                                | AURKA    |
| 122851   | licopyranocoumarin                                                                                                                | AURKB    |
| 122851   | licopyranocoumarin                                                                                                                | CDC42BPA |
| 122851   | licopyranocoumarin                                                                                                                | CHRM1    |
| 122851   | licopyranocoumarin                                                                                                                | CSF1R    |
| 122851   | licopyranocoumarin                                                                                                                | DHFR     |
| 122851   | licopyranocoumarin                                                                                                                | DNM1     |
| 122851   | licopyranocoumarin                                                                                                                | ERN1     |
| 122851   | licopyranocoumarin                                                                                                                | FKBP1A   |
| 122851   | licopyranocoumarin                                                                                                                | HDAC10   |
| 122851   | licopyranocoumarin                                                                                                                | HDAC11   |
| 122851   | licopyranocoumarin                                                                                                                | HDAC3    |
| 122851   | licopyranocoumarin                                                                                                                | HSP90AA1 |
| 122851   | licopyranocoumarin                                                                                                                | MAOB     |
| 122851   | licopyranocoumarin                                                                                                                | MAP2K1   |
| 122851   | licopyranocoumarin                                                                                                                | MTOR     |
| 122851   | licopyranocoumarin                                                                                                                | MTOR     |
| 122851   | licopyranocoumarin                                                                                                                | PDE10A   |
| 122851   | licopyranocoumarin                                                                                                                | PIK3CA   |
| 122851   | licopyranocoumarin                                                                                                                | PIK3CA   |
| 122851   | licopyranocoumarin                                                                                                                | PIK3CG   |
| 122851   | licopyranocoumarin                                                                                                                | PIK3R1   |
| 122851   | licopyranocoumarin                                                                                                                | ROCK1    |
| 122851   | licopyranocoumarin                                                                                                                | ROCK2    |
| 122851   | licopyranocoumarin                                                                                                                | SLC5A2   |
| 122851   | licopyranocoumarin                                                                                                                | TNKS2    |

|        |                                                                                       |        |
|--------|---------------------------------------------------------------------------------------|--------|
| 122851 | licopyranocoumarin                                                                    | WDR5   |
| 122851 | licopyranocoumarin                                                                    | WNT3A  |
| 195396 | 3,22-Dihydroxy-11-oxo-<br>delta(12)-oleanene-27-alpha-<br>methoxycarbonyl-29-oic acid | ACACB  |
| 195396 | 3,22-Dihydroxy-11-oxo-<br>delta(12)-oleanene-27-alpha-<br>methoxycarbonyl-29-oic acid | ACHE   |
| 195396 | 3,22-Dihydroxy-11-oxo-<br>delta(12)-oleanene-27-alpha-<br>methoxycarbonyl-29-oic acid | ACKR3  |
| 195396 | 3,22-Dihydroxy-11-oxo-<br>delta(12)-oleanene-27-alpha-<br>methoxycarbonyl-29-oic acid | AKR1C1 |
| 195396 | 3,22-Dihydroxy-11-oxo-<br>delta(12)-oleanene-27-alpha-<br>methoxycarbonyl-29-oic acid | AKR1C2 |
| 195396 | 3,22-Dihydroxy-11-oxo-<br>delta(12)-oleanene-27-alpha-<br>methoxycarbonyl-29-oic acid | APP    |
| 195396 | 3,22-Dihydroxy-11-oxo-<br>delta(12)-oleanene-27-alpha-<br>methoxycarbonyl-29-oic acid | AR     |
| 195396 | 3,22-Dihydroxy-11-oxo-<br>delta(12)-oleanene-27-alpha-<br>methoxycarbonyl-29-oic acid | AURKA  |
| 195396 | 3,22-Dihydroxy-11-oxo-<br>delta(12)-oleanene-27-alpha-<br>methoxycarbonyl-29-oic acid | AVPR1A |
| 195396 | 3,22-Dihydroxy-11-oxo-<br>delta(12)-oleanene-27-alpha-<br>methoxycarbonyl-29-oic acid | AVPR2  |
| 195396 | 3,22-Dihydroxy-11-oxo-<br>delta(12)-oleanene-27-alpha-<br>methoxycarbonyl-29-oic acid | C5AR1  |
| 195396 | 3,22-Dihydroxy-11-oxo-<br>delta(12)-oleanene-27-alpha-<br>methoxycarbonyl-29-oic acid | CAPN1  |
| 195396 | 3,22-Dihydroxy-11-oxo-<br>delta(12)-oleanene-27-alpha-<br>methoxycarbonyl-29-oic acid | CAPN2  |
| 195396 | 3,22-Dihydroxy-11-oxo-<br>delta(12)-oleanene-27-alpha-<br>methoxycarbonyl-29-oic acid | CASP3  |

|        |                                                                                       |       |
|--------|---------------------------------------------------------------------------------------|-------|
| 195396 | 3,22-Dihydroxy-11-oxo-<br>delta(12)-oleanene-27-alpha-<br>methoxycarbonyl-29-oic acid | CASP7 |
| 195396 | 3,22-Dihydroxy-11-oxo-<br>delta(12)-oleanene-27-alpha-<br>methoxycarbonyl-29-oic acid | CASR  |
| 195396 | 3,22-Dihydroxy-11-oxo-<br>delta(12)-oleanene-27-alpha-<br>methoxycarbonyl-29-oic acid | CCKBR |
| 195396 | 3,22-Dihydroxy-11-oxo-<br>delta(12)-oleanene-27-alpha-<br>methoxycarbonyl-29-oic acid | CCNA1 |
| 195396 | 3,22-Dihydroxy-11-oxo-<br>delta(12)-oleanene-27-alpha-<br>methoxycarbonyl-29-oic acid | CCNA2 |
| 195396 | 3,22-Dihydroxy-11-oxo-<br>delta(12)-oleanene-27-alpha-<br>methoxycarbonyl-29-oic acid | CCNT1 |
| 195396 | 3,22-Dihydroxy-11-oxo-<br>delta(12)-oleanene-27-alpha-<br>methoxycarbonyl-29-oic acid | CCR1  |
| 195396 | 3,22-Dihydroxy-11-oxo-<br>delta(12)-oleanene-27-alpha-<br>methoxycarbonyl-29-oic acid | CDK2  |
| 195396 | 3,22-Dihydroxy-11-oxo-<br>delta(12)-oleanene-27-alpha-<br>methoxycarbonyl-29-oic acid | CDK8  |
| 195396 | 3,22-Dihydroxy-11-oxo-<br>delta(12)-oleanene-27-alpha-<br>methoxycarbonyl-29-oic acid | CES2  |
| 195396 | 3,22-Dihydroxy-11-oxo-<br>delta(12)-oleanene-27-alpha-<br>methoxycarbonyl-29-oic acid | CTRC  |
| 195396 | 3,22-Dihydroxy-11-oxo-<br>delta(12)-oleanene-27-alpha-<br>methoxycarbonyl-29-oic acid | CTSB  |
| 195396 | 3,22-Dihydroxy-11-oxo-<br>delta(12)-oleanene-27-alpha-<br>methoxycarbonyl-29-oic acid | CTSK  |
| 195396 | 3,22-Dihydroxy-11-oxo-<br>delta(12)-oleanene-27-alpha-<br>methoxycarbonyl-29-oic acid | CTSL  |

|        |                                                                                       |         |
|--------|---------------------------------------------------------------------------------------|---------|
| 195396 | 3,22-Dihydroxy-11-oxo-<br>delta(12)-oleanene-27-alpha-<br>methoxycarbonyl-29-oic acid | CTSS    |
| 195396 | 3,22-Dihydroxy-11-oxo-<br>delta(12)-oleanene-27-alpha-<br>methoxycarbonyl-29-oic acid | CXCR3   |
| 195396 | 3,22-Dihydroxy-11-oxo-<br>delta(12)-oleanene-27-alpha-<br>methoxycarbonyl-29-oic acid | CYP17A1 |
| 195396 | 3,22-Dihydroxy-11-oxo-<br>delta(12)-oleanene-27-alpha-<br>methoxycarbonyl-29-oic acid | CYP19A1 |
| 195396 | 3,22-Dihydroxy-11-oxo-<br>delta(12)-oleanene-27-alpha-<br>methoxycarbonyl-29-oic acid | DNTT    |
| 195396 | 3,22-Dihydroxy-11-oxo-<br>delta(12)-oleanene-27-alpha-<br>methoxycarbonyl-29-oic acid | EPAS1   |
| 195396 | 3,22-Dihydroxy-11-oxo-<br>delta(12)-oleanene-27-alpha-<br>methoxycarbonyl-29-oic acid | EPHB4   |
| 195396 | 3,22-Dihydroxy-11-oxo-<br>delta(12)-oleanene-27-alpha-<br>methoxycarbonyl-29-oic acid | EPHX2   |
| 195396 | 3,22-Dihydroxy-11-oxo-<br>delta(12)-oleanene-27-alpha-<br>methoxycarbonyl-29-oic acid | EZH2    |
| 195396 | 3,22-Dihydroxy-11-oxo-<br>delta(12)-oleanene-27-alpha-<br>methoxycarbonyl-29-oic acid | F2      |
| 195396 | 3,22-Dihydroxy-11-oxo-<br>delta(12)-oleanene-27-alpha-<br>methoxycarbonyl-29-oic acid | FLT3    |
| 195396 | 3,22-Dihydroxy-11-oxo-<br>delta(12)-oleanene-27-alpha-<br>methoxycarbonyl-29-oic acid | FNTA    |
| 195396 | 3,22-Dihydroxy-11-oxo-<br>delta(12)-oleanene-27-alpha-<br>methoxycarbonyl-29-oic acid | FNTB    |
| 195396 | 3,22-Dihydroxy-11-oxo-<br>delta(12)-oleanene-27-alpha-<br>methoxycarbonyl-29-oic acid | GSK3B   |

|        |                                                                                       |          |
|--------|---------------------------------------------------------------------------------------|----------|
| 195396 | 3,22-Dihydroxy-11-oxo-<br>delta(12)-oleanene-27-alpha-<br>methoxycarbonyl-29-oic acid | HCRTR1   |
| 195396 | 3,22-Dihydroxy-11-oxo-<br>delta(12)-oleanene-27-alpha-<br>methoxycarbonyl-29-oic acid | HCRTR2   |
| 195396 | 3,22-Dihydroxy-11-oxo-<br>delta(12)-oleanene-27-alpha-<br>methoxycarbonyl-29-oic acid | HMGCR    |
| 195396 | 3,22-Dihydroxy-11-oxo-<br>delta(12)-oleanene-27-alpha-<br>methoxycarbonyl-29-oic acid | HPGDS    |
| 195396 | 3,22-Dihydroxy-11-oxo-<br>delta(12)-oleanene-27-alpha-<br>methoxycarbonyl-29-oic acid | HSD11B1  |
| 195396 | 3,22-Dihydroxy-11-oxo-<br>delta(12)-oleanene-27-alpha-<br>methoxycarbonyl-29-oic acid | HSD11B2  |
| 195396 | 3,22-Dihydroxy-11-oxo-<br>delta(12)-oleanene-27-alpha-<br>methoxycarbonyl-29-oic acid | HSD17B2  |
| 195396 | 3,22-Dihydroxy-11-oxo-<br>delta(12)-oleanene-27-alpha-<br>methoxycarbonyl-29-oic acid | HSP90AA1 |
| 195396 | 3,22-Dihydroxy-11-oxo-<br>delta(12)-oleanene-27-alpha-<br>methoxycarbonyl-29-oic acid | ICAM1    |
| 195396 | 3,22-Dihydroxy-11-oxo-<br>delta(12)-oleanene-27-alpha-<br>methoxycarbonyl-29-oic acid | IDH1     |
| 195396 | 3,22-Dihydroxy-11-oxo-<br>delta(12)-oleanene-27-alpha-<br>methoxycarbonyl-29-oic acid | IGF1R    |
| 195396 | 3,22-Dihydroxy-11-oxo-<br>delta(12)-oleanene-27-alpha-<br>methoxycarbonyl-29-oic acid | ITGAL    |
| 195396 | 3,22-Dihydroxy-11-oxo-<br>delta(12)-oleanene-27-alpha-<br>methoxycarbonyl-29-oic acid | ITGB2    |
| 195396 | 3,22-Dihydroxy-11-oxo-<br>delta(12)-oleanene-27-alpha-<br>methoxycarbonyl-29-oic acid | KDR      |

|        |                                                                                       |        |
|--------|---------------------------------------------------------------------------------------|--------|
| 195396 | 3,22-Dihydroxy-11-oxo-<br>delta(12)-oleanene-27-alpha-<br>methoxycarbonyl-29-oic acid | KIF11  |
| 195396 | 3,22-Dihydroxy-11-oxo-<br>delta(12)-oleanene-27-alpha-<br>methoxycarbonyl-29-oic acid | MAPK1  |
| 195396 | 3,22-Dihydroxy-11-oxo-<br>delta(12)-oleanene-27-alpha-<br>methoxycarbonyl-29-oic acid | MAPK14 |
| 195396 | 3,22-Dihydroxy-11-oxo-<br>delta(12)-oleanene-27-alpha-<br>methoxycarbonyl-29-oic acid | MAPK8  |
| 195396 | 3,22-Dihydroxy-11-oxo-<br>delta(12)-oleanene-27-alpha-<br>methoxycarbonyl-29-oic acid | MAST3  |
| 195396 | 3,22-Dihydroxy-11-oxo-<br>delta(12)-oleanene-27-alpha-<br>methoxycarbonyl-29-oic acid | MDM2   |
| 195396 | 3,22-Dihydroxy-11-oxo-<br>delta(12)-oleanene-27-alpha-<br>methoxycarbonyl-29-oic acid | MDM4   |
| 195396 | 3,22-Dihydroxy-11-oxo-<br>delta(12)-oleanene-27-alpha-<br>methoxycarbonyl-29-oic acid | MTNR1A |
| 195396 | 3,22-Dihydroxy-11-oxo-<br>delta(12)-oleanene-27-alpha-<br>methoxycarbonyl-29-oic acid | MTNR1B |
| 195396 | 3,22-Dihydroxy-11-oxo-<br>delta(12)-oleanene-27-alpha-<br>methoxycarbonyl-29-oic acid | MTOR   |
| 195396 | 3,22-Dihydroxy-11-oxo-<br>delta(12)-oleanene-27-alpha-<br>methoxycarbonyl-29-oic acid | NOS2   |
| 195396 | 3,22-Dihydroxy-11-oxo-<br>delta(12)-oleanene-27-alpha-<br>methoxycarbonyl-29-oic acid | NPY5R  |
| 195396 | 3,22-Dihydroxy-11-oxo-<br>delta(12)-oleanene-27-alpha-<br>methoxycarbonyl-29-oic acid | NR1H4  |
| 195396 | 3,22-Dihydroxy-11-oxo-<br>delta(12)-oleanene-27-alpha-<br>methoxycarbonyl-29-oic acid | NR3C1  |

|        |                                                                                       |        |
|--------|---------------------------------------------------------------------------------------|--------|
| 195396 | 3,22-Dihydroxy-11-oxo-<br>delta(12)-oleanene-27-alpha-<br>methoxycarbonyl-29-oic acid | NR3C2  |
| 195396 | 3,22-Dihydroxy-11-oxo-<br>delta(12)-oleanene-27-alpha-<br>methoxycarbonyl-29-oic acid | P2RX3  |
| 195396 | 3,22-Dihydroxy-11-oxo-<br>delta(12)-oleanene-27-alpha-<br>methoxycarbonyl-29-oic acid | P2RY1  |
| 195396 | 3,22-Dihydroxy-11-oxo-<br>delta(12)-oleanene-27-alpha-<br>methoxycarbonyl-29-oic acid | PDE10A |
| 195396 | 3,22-Dihydroxy-11-oxo-<br>delta(12)-oleanene-27-alpha-<br>methoxycarbonyl-29-oic acid | PDGFRB |
| 195396 | 3,22-Dihydroxy-11-oxo-<br>delta(12)-oleanene-27-alpha-<br>methoxycarbonyl-29-oic acid | PDPK1  |
| 195396 | 3,22-Dihydroxy-11-oxo-<br>delta(12)-oleanene-27-alpha-<br>methoxycarbonyl-29-oic acid | PFKFB3 |
| 195396 | 3,22-Dihydroxy-11-oxo-<br>delta(12)-oleanene-27-alpha-<br>methoxycarbonyl-29-oic acid | PGGT1B |
| 195396 | 3,22-Dihydroxy-11-oxo-<br>delta(12)-oleanene-27-alpha-<br>methoxycarbonyl-29-oic acid | PGR    |
| 195396 | 3,22-Dihydroxy-11-oxo-<br>delta(12)-oleanene-27-alpha-<br>methoxycarbonyl-29-oic acid | PI4KB  |
| 195396 | 3,22-Dihydroxy-11-oxo-<br>delta(12)-oleanene-27-alpha-<br>methoxycarbonyl-29-oic acid | PIK3C3 |
| 195396 | 3,22-Dihydroxy-11-oxo-<br>delta(12)-oleanene-27-alpha-<br>methoxycarbonyl-29-oic acid | PIK3CA |
| 195396 | 3,22-Dihydroxy-11-oxo-<br>delta(12)-oleanene-27-alpha-<br>methoxycarbonyl-29-oic acid | PIK3CB |
| 195396 | 3,22-Dihydroxy-11-oxo-<br>delta(12)-oleanene-27-alpha-<br>methoxycarbonyl-29-oic acid | PIK3CD |

|        |                                                                                       |          |
|--------|---------------------------------------------------------------------------------------|----------|
| 195396 | 3,22-Dihydroxy-11-oxo-<br>delta(12)-oleanene-27-alpha-<br>methoxycarbonyl-29-oic acid | PIK3CG   |
| 195396 | 3,22-Dihydroxy-11-oxo-<br>delta(12)-oleanene-27-alpha-<br>methoxycarbonyl-29-oic acid | PLA2G2A  |
| 195396 | 3,22-Dihydroxy-11-oxo-<br>delta(12)-oleanene-27-alpha-<br>methoxycarbonyl-29-oic acid | PLA2G7   |
| 195396 | 3,22-Dihydroxy-11-oxo-<br>delta(12)-oleanene-27-alpha-<br>methoxycarbonyl-29-oic acid | POLB     |
| 195396 | 3,22-Dihydroxy-11-oxo-<br>delta(12)-oleanene-27-alpha-<br>methoxycarbonyl-29-oic acid | PRKCA    |
| 195396 | 3,22-Dihydroxy-11-oxo-<br>delta(12)-oleanene-27-alpha-<br>methoxycarbonyl-29-oic acid | PRKD1    |
| 195396 | 3,22-Dihydroxy-11-oxo-<br>delta(12)-oleanene-27-alpha-<br>methoxycarbonyl-29-oic acid | PRSS1    |
| 195396 | 3,22-Dihydroxy-11-oxo-<br>delta(12)-oleanene-27-alpha-<br>methoxycarbonyl-29-oic acid | PTGS2    |
| 195396 | 3,22-Dihydroxy-11-oxo-<br>delta(12)-oleanene-27-alpha-<br>methoxycarbonyl-29-oic acid | PTPN1    |
| 195396 | 3,22-Dihydroxy-11-oxo-<br>delta(12)-oleanene-27-alpha-<br>methoxycarbonyl-29-oic acid | PYGL     |
| 195396 | 3,22-Dihydroxy-11-oxo-<br>delta(12)-oleanene-27-alpha-<br>methoxycarbonyl-29-oic acid | REN      |
| 195396 | 3,22-Dihydroxy-11-oxo-<br>delta(12)-oleanene-27-alpha-<br>methoxycarbonyl-29-oic acid | S1PR3    |
| 195396 | 3,22-Dihydroxy-11-oxo-<br>delta(12)-oleanene-27-alpha-<br>methoxycarbonyl-29-oic acid | SERPINA6 |
| 195396 | 3,22-Dihydroxy-11-oxo-<br>delta(12)-oleanene-27-alpha-<br>methoxycarbonyl-29-oic acid | SHBG     |



|         |                                                                                       |         |
|---------|---------------------------------------------------------------------------------------|---------|
| 195396  | 3,22-Dihydroxy-11-oxo-<br>delta(12)-oleanene-27-alpha-<br>methoxycarbonyl-29-oic acid | SLC16A1 |
| 195396  | 3,22-Dihydroxy-11-oxo-<br>delta(12)-oleanene-27-alpha-<br>methoxycarbonyl-29-oic acid | SLC6A2  |
| 195396  | 3,22-Dihydroxy-11-oxo-<br>delta(12)-oleanene-27-alpha-<br>methoxycarbonyl-29-oic acid | SLC6A3  |
| 195396  | 3,22-Dihydroxy-11-oxo-<br>delta(12)-oleanene-27-alpha-<br>methoxycarbonyl-29-oic acid | TACR2   |
| 195396  | 3,22-Dihydroxy-11-oxo-<br>delta(12)-oleanene-27-alpha-<br>methoxycarbonyl-29-oic acid | TERT    |
| 195396  | 3,22-Dihydroxy-11-oxo-<br>delta(12)-oleanene-27-alpha-<br>methoxycarbonyl-29-oic acid | TNF     |
| 195396  | 3,22-Dihydroxy-11-oxo-<br>delta(12)-oleanene-27-alpha-<br>methoxycarbonyl-29-oic acid | VHL     |
| 5317777 | Glyzaglabrin                                                                          | ABCB1   |
| 5317777 | Glyzaglabrin                                                                          | ABCG2   |
| 5317777 | Glyzaglabrin                                                                          | ACHE    |
| 5317777 | Glyzaglabrin                                                                          | ADORA1  |
| 5317777 | Glyzaglabrin                                                                          | ADORA2A |
| 5317777 | Glyzaglabrin                                                                          | ALOX12  |
| 5317777 | Glyzaglabrin                                                                          | BCHE    |
| 5317777 | Glyzaglabrin                                                                          | CA12    |
| 5317777 | Glyzaglabrin                                                                          | CA2     |
| 5317777 | Glyzaglabrin                                                                          | CA4     |
| 5317777 | Glyzaglabrin                                                                          | CA7     |
| 5317777 | Glyzaglabrin                                                                          | CBR1    |
| 5317777 | Glyzaglabrin                                                                          | CDC25B  |
| 5317777 | Glyzaglabrin                                                                          | CDC7    |
| 5317777 | Glyzaglabrin                                                                          | CYP19A1 |
| 5317777 | Glyzaglabrin                                                                          | DUSP3   |
| 5317777 | Glyzaglabrin                                                                          | EGFR    |
| 5317777 | Glyzaglabrin                                                                          | ESR1    |
| 5317777 | Glyzaglabrin                                                                          | ESR2    |
| 5317777 | Glyzaglabrin                                                                          | ESRRA   |
| 5317777 | Glyzaglabrin                                                                          | ESRRB   |
| 5317777 | Glyzaglabrin                                                                          | HSD17B1 |
| 5317777 | Glyzaglabrin                                                                          | HSD17B2 |

|         |               |         |
|---------|---------------|---------|
| 5317777 | Glyzagliabrin | HTR2A   |
| 5317777 | Glyzagliabrin | HTR2C   |
| 5317777 | Glyzagliabrin | LCK     |
| 5317777 | Glyzagliabrin | MAOA    |
| 5317777 | Glyzagliabrin | MAOB    |
| 5317777 | Glyzagliabrin | MGAM    |
| 5317777 | Glyzagliabrin | MIF     |
| 5317777 | Glyzagliabrin | NOX4    |
| 5317777 | Glyzagliabrin | PPARA   |
| 5317777 | Glyzagliabrin | PTK6    |
| 5317777 | Glyzagliabrin | PTPRS   |
| 5317777 | Glyzagliabrin | SIRT1   |
| 5317777 | Glyzagliabrin | TBXAS1  |
| 5317777 | Glyzagliabrin | TLR9    |
| 5317777 | Glyzagliabrin | TYR     |
| 5317777 | Glyzagliabrin | XDH     |
| 124052  | Glabridin     | ADAM17  |
| 124052  | Glabridin     | ADAMTS4 |
| 124052  | Glabridin     | ADAMTS5 |
| 124052  | Glabridin     | ADORA1  |
| 124052  | Glabridin     | ADORA2A |
| 124052  | Glabridin     | ADORA2B |
| 124052  | Glabridin     | ALDH2   |
| 124052  | Glabridin     | AURKA   |
| 124052  | Glabridin     | AURKB   |
| 124052  | Glabridin     | AVPR1A  |
| 124052  | Glabridin     | BMP4    |
| 124052  | Glabridin     | BRAF    |
| 124052  | Glabridin     | CCNB1   |
| 124052  | Glabridin     | CCNB2   |
| 124052  | Glabridin     | CCNB3   |
| 124052  | Glabridin     | CDC25A  |
| 124052  | Glabridin     | CDC25B  |
| 124052  | Glabridin     | CDK1    |
| 124052  | Glabridin     | CDK5    |
| 124052  | Glabridin     | CDK5R1  |
| 124052  | Glabridin     | CES1    |
| 124052  | Glabridin     | CES2    |
| 124052  | Glabridin     | CHEK1   |
| 124052  | Glabridin     | CHRNA7  |
| 124052  | Glabridin     | CMA1    |
| 124052  | Glabridin     | COMT    |
| 124052  | Glabridin     | CSNK1D  |
| 124052  | Glabridin     | CYP11B1 |

|        |           |          |
|--------|-----------|----------|
| 124052 | Glabridin | CYP11B2  |
| 124052 | Glabridin | CYP17A1  |
| 124052 | Glabridin | DPP4     |
| 124052 | Glabridin | DRD1     |
| 124052 | Glabridin | DRD2     |
| 124052 | Glabridin | DRD3     |
| 124052 | Glabridin | EGFR     |
| 124052 | Glabridin | ELANE    |
| 124052 | Glabridin | EPHX2    |
| 124052 | Glabridin | ERBB2    |
| 124052 | Glabridin | ERN1     |
| 124052 | Glabridin | ESR1     |
| 124052 | Glabridin | ESR2     |
| 124052 | Glabridin | FLT3     |
| 124052 | Glabridin | FNTA     |
| 124052 | Glabridin | FNTB     |
| 124052 | Glabridin | GCGR     |
| 124052 | Glabridin | GRIN1    |
| 124052 | Glabridin | GRIN2B   |
| 124052 | Glabridin | GSK3A    |
| 124052 | Glabridin | HDAC1    |
| 124052 | Glabridin | HDAC10   |
| 124052 | Glabridin | HDAC2    |
| 124052 | Glabridin | HDAC3    |
| 124052 | Glabridin | HDAC5    |
| 124052 | Glabridin | HDAC6    |
| 124052 | Glabridin | HDAC7    |
| 124052 | Glabridin | HDAC8    |
| 124052 | Glabridin | HSD11B1  |
| 124052 | Glabridin | HSD17B1  |
| 124052 | Glabridin | HSD17B2  |
| 124052 | Glabridin | HSD17B3  |
| 124052 | Glabridin | HSP90AA1 |
| 124052 | Glabridin | HTR3A    |
| 124052 | Glabridin | IDH1     |
| 124052 | Glabridin | IKBKE    |
| 124052 | Glabridin | KDR      |
| 124052 | Glabridin | KIF11    |
| 124052 | Glabridin | MAOB     |
| 124052 | Glabridin | MAPK1    |
| 124052 | Glabridin | MAPK14   |
| 124052 | Glabridin | MERTK    |
| 124052 | Glabridin | MET      |
| 124052 | Glabridin | MMP1     |

|        |           |         |
|--------|-----------|---------|
| 124052 | Glabridin | MMP12   |
| 124052 | Glabridin | MMP13   |
| 124052 | Glabridin | MMP14   |
| 124052 | Glabridin | MMP3    |
| 124052 | Glabridin | MMP7    |
| 124052 | Glabridin | MMP8    |
| 124052 | Glabridin | MPEG1   |
| 124052 | Glabridin | NPY5R   |
| 124052 | Glabridin | ODC1    |
| 124052 | Glabridin | PARP1   |
| 124052 | Glabridin | PDK1    |
| 124052 | Glabridin | PFKFB3  |
| 124052 | Glabridin | PLA2G1B |
| 124052 | Glabridin | PLEC    |
| 124052 | Glabridin | PLK1    |
| 124052 | Glabridin | PRF1    |
| 124052 | Glabridin | PTPN1   |
| 124052 | Glabridin | RAF1    |
| 124052 | Glabridin | ROCK2   |
| 124052 | Glabridin | S1PR1   |
| 124052 | Glabridin | S1PR3   |
| 124052 | Glabridin | SCD     |
| 124052 | Glabridin | SIGMAR1 |
| 124052 | Glabridin | SRC     |
| 124052 | Glabridin | SREBF2  |
| 124052 | Glabridin | STAT6   |
| 124052 | Glabridin | STK17B  |
| 124052 | Glabridin | TBK1    |
| 124052 | Glabridin | TBXA2R  |
| 124052 | Glabridin | TLR9    |
| 124052 | Glabridin | TNNT2   |
| 124052 | Glabridin | TRPV1   |
| 124052 | Glabridin | TYR     |
| 124052 | Glabridin | VCP     |
| 124049 | Glabranin | ABCC1   |
| 124049 | Glabranin | ABCG2   |
| 124049 | Glabranin | ACHE    |
| 124049 | Glabranin | ADORA1  |
| 124049 | Glabranin | ADORA2A |
| 124049 | Glabranin | ADORA3  |
| 124049 | Glabranin | AKR1C3  |
| 124049 | Glabranin | ANPEP   |
| 124049 | Glabranin | BACE1   |
| 124049 | Glabranin | BCHE    |

|        |           |         |
|--------|-----------|---------|
| 124049 | Glabranin | BCL2A1  |
| 124049 | Glabranin | BLK     |
| 124049 | Glabranin | BMX     |
| 124049 | Glabranin | BTK     |
| 124049 | Glabranin | CA1     |
| 124049 | Glabranin | CA12    |
| 124049 | Glabranin | CA2     |
| 124049 | Glabranin | CA4     |
| 124049 | Glabranin | CA7     |
| 124049 | Glabranin | CASR    |
| 124049 | Glabranin | CBR1    |
| 124049 | Glabranin | CES1    |
| 124049 | Glabranin | CES2    |
| 124049 | Glabranin | COQ8B   |
| 124049 | Glabranin | CSF1R   |
| 124049 | Glabranin | CSK     |
| 124049 | Glabranin | CTSL    |
| 124049 | Glabranin | CXCR2   |
| 124049 | Glabranin | CYP11B1 |
| 124049 | Glabranin | CYP11B2 |
| 124049 | Glabranin | CYP17A1 |
| 124049 | Glabranin | CYP19A1 |
| 124049 | Glabranin | CYP1B1  |
| 124049 | Glabranin | EPHA1   |
| 124049 | Glabranin | EPHA2   |
| 124049 | Glabranin | EPHA3   |
| 124049 | Glabranin | EPHA4   |
| 124049 | Glabranin | EPHA5   |
| 124049 | Glabranin | EPHA6   |
| 124049 | Glabranin | EPHB2   |
| 124049 | Glabranin | EPHB3   |
| 124049 | Glabranin | ERBB2   |
| 124049 | Glabranin | ERN1    |
| 124049 | Glabranin | ESR1    |
| 124049 | Glabranin | ESR2    |
| 124049 | Glabranin | FADS1   |
| 124049 | Glabranin | FAP     |
| 124049 | Glabranin | FGR     |
| 124049 | Glabranin | FPR1    |
| 124049 | Glabranin | FYN     |
| 124049 | Glabranin | GSK3B   |
| 124049 | Glabranin | GSTA1   |
| 124049 | Glabranin | HSD17B1 |
| 124049 | Glabranin | HSD17B2 |

|        |           |          |
|--------|-----------|----------|
| 124049 | Glabranin | HSD17B3  |
| 124049 | Glabranin | HSP90AA1 |
| 124049 | Glabranin | JAK2     |
| 124049 | Glabranin | KDM4E    |
| 124049 | Glabranin | KLK2     |
| 124049 | Glabranin | LCK      |
| 124049 | Glabranin | LYN      |
| 124049 | Glabranin | MAOB     |
| 124049 | Glabranin | MAP3K5   |
| 124049 | Glabranin | MET      |
| 124049 | Glabranin | MMP1     |
| 124049 | Glabranin | MMP12    |
| 124049 | Glabranin | MMP13    |
| 124049 | Glabranin | MTNR1A   |
| 124049 | Glabranin | MTNR1B   |
| 124049 | Glabranin | ODC1     |
| 124049 | Glabranin | PARP1    |
| 124049 | Glabranin | PDE10A   |
| 124049 | Glabranin | PDE4B    |
| 124049 | Glabranin | PIM1     |
| 124049 | Glabranin | PIM2     |
| 124049 | Glabranin | PIM3     |
| 124049 | Glabranin | PLA2G1B  |
| 124049 | Glabranin | PLA2G2A  |
| 124049 | Glabranin | PLA2G5   |
| 124049 | Glabranin | POLB     |
| 124049 | Glabranin | PPARG    |
| 124049 | Glabranin | PTGS1    |
| 124049 | Glabranin | PTK2B    |
| 124049 | Glabranin | PTK6     |
| 124049 | Glabranin | PTPN1    |
| 124049 | Glabranin | QPCT     |
| 124049 | Glabranin | RAF1     |
| 124049 | Glabranin | ROCK1    |
| 124049 | Glabranin | ROCK2    |
| 124049 | Glabranin | RXRA     |
| 124049 | Glabranin | SERPINE1 |
| 124049 | Glabranin | SHBG     |
| 124049 | Glabranin | SLC5A2   |
| 124049 | Glabranin | STAT6    |
| 124049 | Glabranin | SYK      |
| 124049 | Glabranin | TACR3    |
| 124049 | Glabranin | TAS2R31  |
| 124049 | Glabranin | TXK      |

|        |           |         |
|--------|-----------|---------|
| 124049 | Glabranin | TYRO3   |
| 124049 | Glabranin | YES1    |
| 480774 | Glabrene  | ABL1    |
| 480774 | Glabrene  | ACHE    |
| 480774 | Glabrene  | ADAM17  |
| 480774 | Glabrene  | ADORA1  |
| 480774 | Glabrene  | ADORA3  |
| 480774 | Glabrene  | AKR1B1  |
| 480774 | Glabrene  | AKR1B10 |
| 480774 | Glabrene  | ALOX15  |
| 480774 | Glabrene  | ASAH1   |
| 480774 | Glabrene  | AVPR1A  |
| 480774 | Glabrene  | BACE1   |
| 480774 | Glabrene  | CAPN1   |
| 480774 | Glabrene  | CCND1   |
| 480774 | Glabrene  | CCNE1   |
| 480774 | Glabrene  | CCNE1   |
| 480774 | Glabrene  | CCNE1   |
| 480774 | Glabrene  | CCNE1   |
| 480774 | Glabrene  | CCNE2   |
| 480774 | Glabrene  | CDK2    |
| 480774 | Glabrene  | CDK2    |
| 480774 | Glabrene  | CDK3    |
| 480774 | Glabrene  | CDK4    |
| 480774 | Glabrene  | CHEK1   |
| 480774 | Glabrene  | CTSD    |
| 480774 | Glabrene  | CYP2C19 |
| 480774 | Glabrene  | CYP2C9  |
| 480774 | Glabrene  | CYP3A4  |
| 480774 | Glabrene  | DRD1    |
| 480774 | Glabrene  | DRD3    |
| 480774 | Glabrene  | DRD4    |
| 480774 | Glabrene  | DRD5    |
| 480774 | Glabrene  | EGFR    |
| 480774 | Glabrene  | ELANE   |
| 480774 | Glabrene  | EPHA1   |
| 480774 | Glabrene  | EPHA2   |
| 480774 | Glabrene  | EPHA3   |
| 480774 | Glabrene  | EPHA4   |
| 480774 | Glabrene  | EPHA5   |
| 480774 | Glabrene  | EPHA7   |
| 480774 | Glabrene  | EPHA8   |
| 480774 | Glabrene  | EPHB1   |
| 480774 | Glabrene  | EPHB2   |
| 480774 | Glabrene  | EPHB3   |

|        |          |          |
|--------|----------|----------|
| 480774 | Glabrene | EPHB4    |
| 480774 | Glabrene | ESR1     |
| 480774 | Glabrene | ESR2     |
| 480774 | Glabrene | ESRRA    |
| 480774 | Glabrene | ESRRB    |
| 480774 | Glabrene | F10      |
| 480774 | Glabrene | F3       |
| 480774 | Glabrene | FASN     |
| 480774 | Glabrene | FLT3     |
| 480774 | Glabrene | GCGR     |
| 480774 | Glabrene | HDAC1    |
| 480774 | Glabrene | HSD17B1  |
| 480774 | Glabrene | HSD17B2  |
| 480774 | Glabrene | HSP90AA1 |
| 480774 | Glabrene | HTR1A    |
| 480774 | Glabrene | HTR1B    |
| 480774 | Glabrene | JAK2     |
| 480774 | Glabrene | JAK3     |
| 480774 | Glabrene | KIF11    |
| 480774 | Glabrene | LCK      |
| 480774 | Glabrene | MAPK14   |
| 480774 | Glabrene | MMP1     |
| 480774 | Glabrene | MMP2     |
| 480774 | Glabrene | MMP9     |
| 480774 | Glabrene | MTOR     |
| 480774 | Glabrene | NAAA     |
| 480774 | Glabrene | NR1H4    |
| 480774 | Glabrene | PDE7A    |
| 480774 | Glabrene | PDK1     |
| 480774 | Glabrene | PHLPP2   |
| 480774 | Glabrene | PLK1     |
| 480774 | Glabrene | PRKCZ    |
| 480774 | Glabrene | PTGS1    |
| 480774 | Glabrene | PTPN1    |
| 480774 | Glabrene | RAF1     |
| 480774 | Glabrene | RARA     |
| 480774 | Glabrene | RARG     |
| 480774 | Glabrene | SLC6A2   |
| 480774 | Glabrene | TACR2    |
| 480774 | Glabrene | THRA     |
| 480774 | Glabrene | THRB     |
| 480774 | Glabrene | TNKS     |
| 480774 | Glabrene | TNKS2    |
| 480774 | Glabrene | TRPM8    |



|        |            |         |
|--------|------------|---------|
| 480774 | Glabrene   | TSPO    |
| 480774 | Glabrene   | WEE1    |
| 336327 | Medicarpin | ABCB1   |
| 336327 | Medicarpin | ABL1    |
| 336327 | Medicarpin | ADAM17  |
| 336327 | Medicarpin | ADORA2B |
| 336327 | Medicarpin | ALK     |
| 336327 | Medicarpin | ALOX12  |
| 336327 | Medicarpin | ALOX15  |
| 336327 | Medicarpin | ALPL    |
| 336327 | Medicarpin | CA1     |
| 336327 | Medicarpin | CA12    |
| 336327 | Medicarpin | CA14    |
| 336327 | Medicarpin | CA2     |
| 336327 | Medicarpin | CA4     |
| 336327 | Medicarpin | CA5A    |
| 336327 | Medicarpin | CA5B    |
| 336327 | Medicarpin | CA9     |
| 336327 | Medicarpin | CASP3   |
| 336327 | Medicarpin | CASP7   |
| 336327 | Medicarpin | CCND1   |
| 336327 | Medicarpin | CCND2   |
| 336327 | Medicarpin | CCND3   |
| 336327 | Medicarpin | CDK2    |
| 336327 | Medicarpin | CDK4    |
| 336327 | Medicarpin | CDK4    |
| 336327 | Medicarpin | CHEK1   |
| 336327 | Medicarpin | COMT    |
| 336327 | Medicarpin | CTSS    |
| 336327 | Medicarpin | CYP11B1 |
| 336327 | Medicarpin | CYP11B2 |
| 336327 | Medicarpin | CYP17A1 |
| 336327 | Medicarpin | CYP19A1 |
| 336327 | Medicarpin | DAO     |
| 336327 | Medicarpin | DGAT1   |
| 336327 | Medicarpin | EIF4A1  |
| 336327 | Medicarpin | EPHA3   |
| 336327 | Medicarpin | EPHB2   |
| 336327 | Medicarpin | EPHB4   |
| 336327 | Medicarpin | ERN1    |
| 336327 | Medicarpin | ESR1    |
| 336327 | Medicarpin | ESR2    |
| 336327 | Medicarpin | FGFR1   |
| 336327 | Medicarpin | GABRA5  |

|        |            |          |
|--------|------------|----------|
| 336327 | Medicarpin | GABRB3   |
| 336327 | Medicarpin | GABRG2   |
| 336327 | Medicarpin | GCK      |
| 336327 | Medicarpin | GRIA1    |
| 336327 | Medicarpin | GSK3B    |
| 336327 | Medicarpin | GSTM2    |
| 336327 | Medicarpin | GSTP1    |
| 336327 | Medicarpin | HCK      |
| 336327 | Medicarpin | HDAC2    |
| 336327 | Medicarpin | HDAC4    |
| 336327 | Medicarpin | HSD17B14 |
| 336327 | Medicarpin | HSD17B2  |
| 336327 | Medicarpin | HSD17B3  |
| 336327 | Medicarpin | HTT      |
| 336327 | Medicarpin | IRAK4    |
| 336327 | Medicarpin | JAK3     |
| 336327 | Medicarpin | KDM4C    |
| 336327 | Medicarpin | KDR      |
| 336327 | Medicarpin | KIT      |
| 336327 | Medicarpin | LCK      |
| 336327 | Medicarpin | LNPEP    |
| 336327 | Medicarpin | MAP2K1   |
| 336327 | Medicarpin | MAPKAPK2 |
| 336327 | Medicarpin | MBD2     |
| 336327 | Medicarpin | MET      |
| 336327 | Medicarpin | MIF      |
| 336327 | Medicarpin | MKNK1    |
| 336327 | Medicarpin | MMP1     |
| 336327 | Medicarpin | MMP3     |
| 336327 | Medicarpin | MMP7     |
| 336327 | Medicarpin | MMP8     |
| 336327 | Medicarpin | MPEG1    |
| 336327 | Medicarpin | MTOR     |
| 336327 | Medicarpin | PARP1    |
| 336327 | Medicarpin | PDE4A    |
| 336327 | Medicarpin | PDE4B    |
| 336327 | Medicarpin | PDE4C    |
| 336327 | Medicarpin | PDE4D    |
| 336327 | Medicarpin | PGK1     |
| 336327 | Medicarpin | PIK3CA   |
| 336327 | Medicarpin | PIK3CA   |
| 336327 | Medicarpin | PIK3CB   |
| 336327 | Medicarpin | PIK3CD   |
| 336327 | Medicarpin | PIK3CG   |

|          |                                                        |          |
|----------|--------------------------------------------------------|----------|
| 336327   | Medicarpin                                             | PIK3R1   |
| 336327   | Medicarpin                                             | PIK3R1   |
| 336327   | Medicarpin                                             | PIM1     |
| 336327   | Medicarpin                                             | PIM2     |
| 336327   | Medicarpin                                             | PLK1     |
| 336327   | Medicarpin                                             | PRKDC    |
| 336327   | Medicarpin                                             | PTGS1    |
| 336327   | Medicarpin                                             | PTPN1    |
| 336327   | Medicarpin                                             | RAF1     |
| 336327   | Medicarpin                                             | RET      |
| 336327   | Medicarpin                                             | RPS6KA2  |
| 336327   | Medicarpin                                             | RPS6KA5  |
| 336327   | Medicarpin                                             | SRC      |
| 336327   | Medicarpin                                             | SYK      |
| 336327   | Medicarpin                                             | TUBB1    |
| 336327   | Medicarpin                                             | TUBB3    |
| 336327   | Medicarpin                                             | TYMS     |
| 336327   | Medicarpin                                             | VCP      |
| 336327   | Medicarpin                                             | WEE1     |
| 336327   | Medicarpin                                             | XIAP     |
| 5317652  | Glabrone                                               | ADRB1    |
| 5317652  | Glabrone                                               | ADRB2    |
| 5317652  | Glabrone                                               | ALDH2    |
| 5317652  | Glabrone                                               | CA7      |
| 5317652  | Glabrone                                               | GCGR     |
| 5317652  | Glabrone                                               | HSP90AA1 |
| 5317652  | Glabrone                                               | HSP90AB1 |
| 5317652  | Glabrone                                               | PDE10A   |
| 5317652  | Glabrone                                               | PDE4D    |
| 5317652  | Glabrone                                               | PTPN1    |
| 11558452 | 1,3-dihydroxy-9-methoxy-6-benzofurano[3,2-c]chromenone | AKR1B1   |
| 11558452 | 1,3-dihydroxy-9-methoxy-6-benzofurano[3,2-c]chromenone | ALOX5    |
| 11558452 | 1,3-dihydroxy-9-methoxy-6-benzofurano[3,2-c]chromenone | AURKA    |
| 11558452 | 1,3-dihydroxy-9-methoxy-6-benzofurano[3,2-c]chromenone | BRAF     |
| 11558452 | 1,3-dihydroxy-9-methoxy-6-benzofurano[3,2-c]chromenone | CA1      |
| 11558452 | 1,3-dihydroxy-9-methoxy-6-benzofurano[3,2-c]chromenone | CA12     |
| 11558452 | 1,3-dihydroxy-9-methoxy-6-benzofurano[3,2-c]chromenone | CA13     |

|          |                                                        |        |
|----------|--------------------------------------------------------|--------|
| 11558452 | 1,3-dihydroxy-9-methoxy-6-benzofurano[3,2-c]chromenone | CA14   |
| 11558452 | 1,3-dihydroxy-9-methoxy-6-benzofurano[3,2-c]chromenone | CA4    |
| 11558452 | 1,3-dihydroxy-9-methoxy-6-benzofurano[3,2-c]chromenone | CA5A   |
| 11558452 | 1,3-dihydroxy-9-methoxy-6-benzofurano[3,2-c]chromenone | CA5B   |
| 11558452 | 1,3-dihydroxy-9-methoxy-6-benzofurano[3,2-c]chromenone | CA6    |
| 11558452 | 1,3-dihydroxy-9-methoxy-6-benzofurano[3,2-c]chromenone | CA7    |
| 11558452 | 1,3-dihydroxy-9-methoxy-6-benzofurano[3,2-c]chromenone | CA9    |
| 11558452 | 1,3-dihydroxy-9-methoxy-6-benzofurano[3,2-c]chromenone | CBR1   |
| 11558452 | 1,3-dihydroxy-9-methoxy-6-benzofurano[3,2-c]chromenone | CCNA1  |
| 11558452 | 1,3-dihydroxy-9-methoxy-6-benzofurano[3,2-c]chromenone | CCNA2  |
| 11558452 | 1,3-dihydroxy-9-methoxy-6-benzofurano[3,2-c]chromenone | CCND1  |
| 11558452 | 1,3-dihydroxy-9-methoxy-6-benzofurano[3,2-c]chromenone | CDK2   |
| 11558452 | 1,3-dihydroxy-9-methoxy-6-benzofurano[3,2-c]chromenone | CDK4   |
| 11558452 | 1,3-dihydroxy-9-methoxy-6-benzofurano[3,2-c]chromenone | CYP1A2 |
| 11558452 | 1,3-dihydroxy-9-methoxy-6-benzofurano[3,2-c]chromenone | EGFR   |
| 11558452 | 1,3-dihydroxy-9-methoxy-6-benzofurano[3,2-c]chromenone | EPHB4  |
| 11558452 | 1,3-dihydroxy-9-methoxy-6-benzofurano[3,2-c]chromenone | ERBB2  |
| 11558452 | 1,3-dihydroxy-9-methoxy-6-benzofurano[3,2-c]chromenone | ESR1   |
| 11558452 | 1,3-dihydroxy-9-methoxy-6-benzofurano[3,2-c]chromenone | ESR2   |
| 11558452 | 1,3-dihydroxy-9-methoxy-6-benzofurano[3,2-c]chromenone | FEN1   |
| 11558452 | 1,3-dihydroxy-9-methoxy-6-benzofurano[3,2-c]chromenone | FGR    |
| 11558452 | 1,3-dihydroxy-9-methoxy-6-benzofurano[3,2-c]chromenone | FLT4   |

|          |                                                            |         |
|----------|------------------------------------------------------------|---------|
| 11558452 | 1,3-dihydroxy-9-methoxy-6-benzofurano[3,2-c]chromenone     | GSR     |
| 11558452 | 1,3-dihydroxy-9-methoxy-6-benzofurano[3,2-c]chromenone     | HSD17B1 |
| 11558452 | 1,3-dihydroxy-9-methoxy-6-benzofurano[3,2-c]chromenone     | INSR    |
| 11558452 | 1,3-dihydroxy-9-methoxy-6-benzofurano[3,2-c]chromenone     | KCNA3   |
| 11558452 | 1,3-dihydroxy-9-methoxy-6-benzofurano[3,2-c]chromenone     | KCNA5   |
| 11558452 | 1,3-dihydroxy-9-methoxy-6-benzofurano[3,2-c]chromenone     | KCNMA1  |
| 11558452 | 1,3-dihydroxy-9-methoxy-6-benzofurano[3,2-c]chromenone     | LYN     |
| 11558452 | 1,3-dihydroxy-9-methoxy-6-benzofurano[3,2-c]chromenone     | MAP3K8  |
| 11558452 | 1,3-dihydroxy-9-methoxy-6-benzofurano[3,2-c]chromenone     | PDGFRB  |
| 11558452 | 1,3-dihydroxy-9-methoxy-6-benzofurano[3,2-c]chromenone     | PLK4    |
| 11558452 | 1,3-dihydroxy-9-methoxy-6-benzofurano[3,2-c]chromenone     | SQLE    |
| 11558452 | 1,3-dihydroxy-9-methoxy-6-benzofurano[3,2-c]chromenone     | SRC     |
| 11558452 | 1,3-dihydroxy-9-methoxy-6-benzofurano[3,2-c]chromenone     | TEK     |
| 11602329 | 1,3-dihydroxy-8,9-dimethoxy-6-benzofurano[3,2-c]chromenone | AKR1B1  |
| 11602329 | 1,3-dihydroxy-8,9-dimethoxy-6-benzofurano[3,2-c]chromenone | ALOX5   |
| 11602329 | 1,3-dihydroxy-8,9-dimethoxy-6-benzofurano[3,2-c]chromenone | AURKA   |
| 11602329 | 1,3-dihydroxy-8,9-dimethoxy-6-benzofurano[3,2-c]chromenone | BRAF    |
| 11602329 | 1,3-dihydroxy-8,9-dimethoxy-6-benzofurano[3,2-c]chromenone | CA12    |
| 11602329 | 1,3-dihydroxy-8,9-dimethoxy-6-benzofurano[3,2-c]chromenone | CA13    |
| 11602329 | 1,3-dihydroxy-8,9-dimethoxy-6-benzofurano[3,2-c]chromenone | CA14    |
| 11602329 | 1,3-dihydroxy-8,9-dimethoxy-6-benzofurano[3,2-c]chromenone | CA5A    |
| 11602329 | 1,3-dihydroxy-8,9-dimethoxy-6-benzofurano[3,2-c]chromenone | CA5B    |

|          |                                                            |         |
|----------|------------------------------------------------------------|---------|
| 11602329 | 1,3-dihydroxy-8,9-dimethoxy-6-benzofurano[3,2-c]chromenone | CA9     |
| 11602329 | 1,3-dihydroxy-8,9-dimethoxy-6-benzofurano[3,2-c]chromenone | CBR1    |
| 11602329 | 1,3-dihydroxy-8,9-dimethoxy-6-benzofurano[3,2-c]chromenone | CCNA1   |
| 11602329 | 1,3-dihydroxy-8,9-dimethoxy-6-benzofurano[3,2-c]chromenone | CCNA2   |
| 11602329 | 1,3-dihydroxy-8,9-dimethoxy-6-benzofurano[3,2-c]chromenone | CCND1   |
| 11602329 | 1,3-dihydroxy-8,9-dimethoxy-6-benzofurano[3,2-c]chromenone | CDK2    |
| 11602329 | 1,3-dihydroxy-8,9-dimethoxy-6-benzofurano[3,2-c]chromenone | CDK4    |
| 11602329 | 1,3-dihydroxy-8,9-dimethoxy-6-benzofurano[3,2-c]chromenone | CSNK2A1 |
| 11602329 | 1,3-dihydroxy-8,9-dimethoxy-6-benzofurano[3,2-c]chromenone | EGFR    |
| 11602329 | 1,3-dihydroxy-8,9-dimethoxy-6-benzofurano[3,2-c]chromenone | EPHB4   |
| 11602329 | 1,3-dihydroxy-8,9-dimethoxy-6-benzofurano[3,2-c]chromenone | ERBB2   |
| 11602329 | 1,3-dihydroxy-8,9-dimethoxy-6-benzofurano[3,2-c]chromenone | ESR1    |
| 11602329 | 1,3-dihydroxy-8,9-dimethoxy-6-benzofurano[3,2-c]chromenone | ESR2    |
| 11602329 | 1,3-dihydroxy-8,9-dimethoxy-6-benzofurano[3,2-c]chromenone | FGR     |
| 11602329 | 1,3-dihydroxy-8,9-dimethoxy-6-benzofurano[3,2-c]chromenone | FLT4    |
| 11602329 | 1,3-dihydroxy-8,9-dimethoxy-6-benzofurano[3,2-c]chromenone | GSK3B   |
| 11602329 | 1,3-dihydroxy-8,9-dimethoxy-6-benzofurano[3,2-c]chromenone | GSR     |
| 11602329 | 1,3-dihydroxy-8,9-dimethoxy-6-benzofurano[3,2-c]chromenone | INSR    |
| 11602329 | 1,3-dihydroxy-8,9-dimethoxy-6-benzofurano[3,2-c]chromenone | KCNA3   |
| 11602329 | 1,3-dihydroxy-8,9-dimethoxy-6-benzofurano[3,2-c]chromenone | KCNA5   |
| 11602329 | 1,3-dihydroxy-8,9-dimethoxy-6-benzofurano[3,2-c]chromenone | LYN     |
| 11602329 | 1,3-dihydroxy-8,9-dimethoxy-6-benzofurano[3,2-c]chromenone | MAOA    |

|          |                                                            |          |
|----------|------------------------------------------------------------|----------|
| 11602329 | 1,3-dihydroxy-8,9-dimethoxy-6-benzofurano[3,2-c]chromenone | MAP3K8   |
| 11602329 | 1,3-dihydroxy-8,9-dimethoxy-6-benzofurano[3,2-c]chromenone | PDGFRB   |
| 11602329 | 1,3-dihydroxy-8,9-dimethoxy-6-benzofurano[3,2-c]chromenone | PLK4     |
| 11602329 | 1,3-dihydroxy-8,9-dimethoxy-6-benzofurano[3,2-c]chromenone | SQLE     |
| 11602329 | 1,3-dihydroxy-8,9-dimethoxy-6-benzofurano[3,2-c]chromenone | TEK      |
| 5317300  | Eurycarpin A                                               | ABCB1    |
| 5317300  | Eurycarpin A                                               | ABCG2    |
| 5317300  | Eurycarpin A                                               | ACHE     |
| 5317300  | Eurycarpin A                                               | ADRB1    |
| 5317300  | Eurycarpin A                                               | ADRB2    |
| 5317300  | Eurycarpin A                                               | ALDH2    |
| 5317300  | Eurycarpin A                                               | AR       |
| 5317300  | Eurycarpin A                                               | BCL2L1   |
| 5317300  | Eurycarpin A                                               | CA12     |
| 5317300  | Eurycarpin A                                               | CHEK2    |
| 5317300  | Eurycarpin A                                               | CYP19A1  |
| 5317300  | Eurycarpin A                                               | EGFR     |
| 5317300  | Eurycarpin A                                               | ESR1     |
| 5317300  | Eurycarpin A                                               | ESRRA    |
| 5317300  | Eurycarpin A                                               | ESRRB    |
| 5317300  | Eurycarpin A                                               | GCGR     |
| 5317300  | Eurycarpin A                                               | HSD17B1  |
| 5317300  | Eurycarpin A                                               | HSD17B2  |
| 5317300  | Eurycarpin A                                               | HSP90AA1 |
| 5317300  | Eurycarpin A                                               | HSP90AB1 |
| 5317300  | Eurycarpin A                                               | HTR2A    |
| 5317300  | Eurycarpin A                                               | IL2      |
| 5317300  | Eurycarpin A                                               | MAOA     |
| 5317300  | Eurycarpin A                                               | MGAM     |
| 5317300  | Eurycarpin A                                               | MIF      |
| 5317300  | Eurycarpin A                                               | NOX4     |
| 5317300  | Eurycarpin A                                               | PDE10A   |
| 5317300  | Eurycarpin A                                               | PFKFB3   |
| 5317300  | Eurycarpin A                                               | PTPN1    |
| 5317300  | Eurycarpin A                                               | PTPRS    |
| 5317300  | Eurycarpin A                                               | RELA     |
| 5317300  | Eurycarpin A                                               | TBXAS1   |
| 5317300  | Eurycarpin A                                               | TYR      |
| 5317300  | Eurycarpin A                                               | XDH      |

|          |                  |         |
|----------|------------------|---------|
| 23724664 | (-)-Medicocarpin | ABL1    |
| 23724664 | (-)-Medicocarpin | ADK     |
| 23724664 | (-)-Medicocarpin | ADORA1  |
| 23724664 | (-)-Medicocarpin | ADORA2A |
| 23724664 | (-)-Medicocarpin | ADORA2B |
| 23724664 | (-)-Medicocarpin | CA14    |
| 23724664 | (-)-Medicocarpin | CASP3   |
| 23724664 | (-)-Medicocarpin | CTSK    |
| 23724664 | (-)-Medicocarpin | CTSL    |
| 23724664 | (-)-Medicocarpin | CTSS    |
| 23724664 | (-)-Medicocarpin | CYP19A1 |
| 23724664 | (-)-Medicocarpin | EGFR    |
| 23724664 | (-)-Medicocarpin | EIF4A1  |
| 23724664 | (-)-Medicocarpin | GBA     |
| 23724664 | (-)-Medicocarpin | HSPA5   |
| 23724664 | (-)-Medicocarpin | MAP2K1  |
| 23724664 | (-)-Medicocarpin | MGMT    |
| 23724664 | (-)-Medicocarpin | PDGFRA  |
| 23724664 | (-)-Medicocarpin | PDGFRB  |
| 23724664 | (-)-Medicocarpin | PYGL    |
| 23724664 | (-)-Medicocarpin | SLC28A2 |
| 23724664 | (-)-Medicocarpin | SLC29A1 |
| 23724664 | (-)-Medicocarpin | SLC2A1  |
| 23724664 | (-)-Medicocarpin | SLC5A1  |
| 23724664 | (-)-Medicocarpin | SLC5A2  |
| 23724664 | (-)-Medicocarpin | SLC5A4  |
| 23724664 | (-)-Medicocarpin | TYR     |
| 73205    | Sigmoidin-B      | ABCC1   |
| 73205    | Sigmoidin-B      | ABCG2   |
| 73205    | Sigmoidin-B      | ABL1    |
| 73205    | Sigmoidin-B      | ACHE    |
| 73205    | Sigmoidin-B      | ADAM17  |
| 73205    | Sigmoidin-B      | ADORA1  |
| 73205    | Sigmoidin-B      | ADORA2B |
| 73205    | Sigmoidin-B      | ADORA3  |
| 73205    | Sigmoidin-B      | AKR1B10 |
| 73205    | Sigmoidin-B      | BACE1   |
| 73205    | Sigmoidin-B      | BCHE    |
| 73205    | Sigmoidin-B      | BCL2    |
| 73205    | Sigmoidin-B      | BCL2L1  |
| 73205    | Sigmoidin-B      | BRAF    |
| 73205    | Sigmoidin-B      | CA12    |
| 73205    | Sigmoidin-B      | CA4     |
| 73205    | Sigmoidin-B      | CA7     |



|       |             |          |
|-------|-------------|----------|
| 73205 | Sigmoidin-B | CBR1     |
| 73205 | Sigmoidin-B | CES1     |
| 73205 | Sigmoidin-B | CES2     |
| 73205 | Sigmoidin-B | CHEK1    |
| 73205 | Sigmoidin-B | CHRNA7   |
| 73205 | Sigmoidin-B | CTSL     |
| 73205 | Sigmoidin-B | CYP19A1  |
| 73205 | Sigmoidin-B | CYP1B1   |
| 73205 | Sigmoidin-B | DNM1     |
| 73205 | Sigmoidin-B | DRD1     |
| 73205 | Sigmoidin-B | DRD3     |
| 73205 | Sigmoidin-B | DRD4     |
| 73205 | Sigmoidin-B | DRD5     |
| 73205 | Sigmoidin-B | ESR1     |
| 73205 | Sigmoidin-B | ESR2     |
| 73205 | Sigmoidin-B | ESRRA    |
| 73205 | Sigmoidin-B | ESRRB    |
| 73205 | Sigmoidin-B | F3       |
| 73205 | Sigmoidin-B | GCGR     |
| 73205 | Sigmoidin-B | HDAC4    |
| 73205 | Sigmoidin-B | HSD17B1  |
| 73205 | Sigmoidin-B | HSD17B2  |
| 73205 | Sigmoidin-B | HSP90AA1 |
| 73205 | Sigmoidin-B | IGF1R    |
| 73205 | Sigmoidin-B | INSR     |
| 73205 | Sigmoidin-B | KLK2     |
| 73205 | Sigmoidin-B | MAOB     |
| 73205 | Sigmoidin-B | MAPK14   |
| 73205 | Sigmoidin-B | MCL1     |
| 73205 | Sigmoidin-B | MMP1     |
| 73205 | Sigmoidin-B | MMP12    |
| 73205 | Sigmoidin-B | MMP13    |
| 73205 | Sigmoidin-B | NOX4     |
| 73205 | Sigmoidin-B | ODC1     |
| 73205 | Sigmoidin-B | PDK1     |
| 73205 | Sigmoidin-B | PIM1     |
| 73205 | Sigmoidin-B | PIM2     |
| 73205 | Sigmoidin-B | PIM3     |
| 73205 | Sigmoidin-B | PLA2G10  |
| 73205 | Sigmoidin-B | PLA2G1B  |
| 73205 | Sigmoidin-B | PLA2G5   |
| 73205 | Sigmoidin-B | PLG      |
| 73205 | Sigmoidin-B | POLB     |
| 73205 | Sigmoidin-B | PPARG    |

|        |                                                 |          |
|--------|-------------------------------------------------|----------|
| 73205  | Sigmoidin-B                                     | PTGS1    |
| 73205  | Sigmoidin-B                                     | PTPN1    |
| 73205  | Sigmoidin-B                                     | RET      |
| 73205  | Sigmoidin-B                                     | RXRA     |
| 73205  | Sigmoidin-B                                     | SERPINE1 |
| 73205  | Sigmoidin-B                                     | SGK1     |
| 73205  | Sigmoidin-B                                     | SHBG     |
| 73205  | Sigmoidin-B                                     | SLC5A2   |
| 73205  | Sigmoidin-B                                     | SRC      |
| 73205  | Sigmoidin-B                                     | TAS2R31  |
| 73205  | Sigmoidin-B                                     | TNF      |
| 73205  | Sigmoidin-B                                     | WEE1     |
| 928837 | (2R)-7-hydroxy-2-(4-hydroxyphenyl)chroman-4-one | ABCC1    |
| 928837 | (2R)-7-hydroxy-2-(4-hydroxyphenyl)chroman-4-one | ABCG2    |
| 928837 | (2R)-7-hydroxy-2-(4-hydroxyphenyl)chroman-4-one | ABL1     |
| 928837 | (2R)-7-hydroxy-2-(4-hydroxyphenyl)chroman-4-one | ACHE     |
| 928837 | (2R)-7-hydroxy-2-(4-hydroxyphenyl)chroman-4-one | ADORA1   |
| 928837 | (2R)-7-hydroxy-2-(4-hydroxyphenyl)chroman-4-one | ADORA3   |
| 928837 | (2R)-7-hydroxy-2-(4-hydroxyphenyl)chroman-4-one | AKR1C3   |
| 928837 | (2R)-7-hydroxy-2-(4-hydroxyphenyl)chroman-4-one | ALK      |
| 928837 | (2R)-7-hydroxy-2-(4-hydroxyphenyl)chroman-4-one | ALPG     |
| 928837 | (2R)-7-hydroxy-2-(4-hydroxyphenyl)chroman-4-one | ALPL     |
| 928837 | (2R)-7-hydroxy-2-(4-hydroxyphenyl)chroman-4-one | APP      |
| 928837 | (2R)-7-hydroxy-2-(4-hydroxyphenyl)chroman-4-one | AURKA    |
| 928837 | (2R)-7-hydroxy-2-(4-hydroxyphenyl)chroman-4-one | AURKB    |
| 928837 | (2R)-7-hydroxy-2-(4-hydroxyphenyl)chroman-4-one | BACE1    |
| 928837 | (2R)-7-hydroxy-2-(4-hydroxyphenyl)chroman-4-one | BCHE     |
| 928837 | (2R)-7-hydroxy-2-(4-hydroxyphenyl)chroman-4-one | CA1      |

|        |                                                 |       |
|--------|-------------------------------------------------|-------|
| 928837 | (2R)-7-hydroxy-2-(4-hydroxyphenyl)chroman-4-one | CA12  |
| 928837 | (2R)-7-hydroxy-2-(4-hydroxyphenyl)chroman-4-one | CA13  |
| 928837 | (2R)-7-hydroxy-2-(4-hydroxyphenyl)chroman-4-one | CA2   |
| 928837 | (2R)-7-hydroxy-2-(4-hydroxyphenyl)chroman-4-one | CA3   |
| 928837 | (2R)-7-hydroxy-2-(4-hydroxyphenyl)chroman-4-one | CA4   |
| 928837 | (2R)-7-hydroxy-2-(4-hydroxyphenyl)chroman-4-one | CA5A  |
| 928837 | (2R)-7-hydroxy-2-(4-hydroxyphenyl)chroman-4-one | CA5B  |
| 928837 | (2R)-7-hydroxy-2-(4-hydroxyphenyl)chroman-4-one | CA6   |
| 928837 | (2R)-7-hydroxy-2-(4-hydroxyphenyl)chroman-4-one | CA7   |
| 928837 | (2R)-7-hydroxy-2-(4-hydroxyphenyl)chroman-4-one | CA9   |
| 928837 | (2R)-7-hydroxy-2-(4-hydroxyphenyl)chroman-4-one | CBR1  |
| 928837 | (2R)-7-hydroxy-2-(4-hydroxyphenyl)chroman-4-one | CCNB1 |
| 928837 | (2R)-7-hydroxy-2-(4-hydroxyphenyl)chroman-4-one | CCNB2 |
| 928837 | (2R)-7-hydroxy-2-(4-hydroxyphenyl)chroman-4-one | CCNB3 |
| 928837 | (2R)-7-hydroxy-2-(4-hydroxyphenyl)chroman-4-one | CCNE1 |
| 928837 | (2R)-7-hydroxy-2-(4-hydroxyphenyl)chroman-4-one | CCNE2 |
| 928837 | (2R)-7-hydroxy-2-(4-hydroxyphenyl)chroman-4-one | CDK1  |
| 928837 | (2R)-7-hydroxy-2-(4-hydroxyphenyl)chroman-4-one | CDK1  |
| 928837 | (2R)-7-hydroxy-2-(4-hydroxyphenyl)chroman-4-one | CDK2  |
| 928837 | (2R)-7-hydroxy-2-(4-hydroxyphenyl)chroman-4-one | CDK2  |
| 928837 | (2R)-7-hydroxy-2-(4-hydroxyphenyl)chroman-4-one | CDK4  |
| 928837 | (2R)-7-hydroxy-2-(4-hydroxyphenyl)chroman-4-one | CDK5  |

|        |                                                 |         |
|--------|-------------------------------------------------|---------|
| 928837 | (2R)-7-hydroxy-2-(4-hydroxyphenyl)chroman-4-one | CDK5R1  |
| 928837 | (2R)-7-hydroxy-2-(4-hydroxyphenyl)chroman-4-one | CES1    |
| 928837 | (2R)-7-hydroxy-2-(4-hydroxyphenyl)chroman-4-one | CES2    |
| 928837 | (2R)-7-hydroxy-2-(4-hydroxyphenyl)chroman-4-one | CHEK1   |
| 928837 | (2R)-7-hydroxy-2-(4-hydroxyphenyl)chroman-4-one | CISD1   |
| 928837 | (2R)-7-hydroxy-2-(4-hydroxyphenyl)chroman-4-one | CYP19A1 |
| 928837 | (2R)-7-hydroxy-2-(4-hydroxyphenyl)chroman-4-one | CYP1B1  |
| 928837 | (2R)-7-hydroxy-2-(4-hydroxyphenyl)chroman-4-one | DAO     |
| 928837 | (2R)-7-hydroxy-2-(4-hydroxyphenyl)chroman-4-one | DCTPP1  |
| 928837 | (2R)-7-hydroxy-2-(4-hydroxyphenyl)chroman-4-one | EDNRA   |
| 928837 | (2R)-7-hydroxy-2-(4-hydroxyphenyl)chroman-4-one | EEF2K   |
| 928837 | (2R)-7-hydroxy-2-(4-hydroxyphenyl)chroman-4-one | ERN1    |
| 928837 | (2R)-7-hydroxy-2-(4-hydroxyphenyl)chroman-4-one | ESR1    |
| 928837 | (2R)-7-hydroxy-2-(4-hydroxyphenyl)chroman-4-one | ESR2    |
| 928837 | (2R)-7-hydroxy-2-(4-hydroxyphenyl)chroman-4-one | GCGR    |
| 928837 | (2R)-7-hydroxy-2-(4-hydroxyphenyl)chroman-4-one | GRK2    |
| 928837 | (2R)-7-hydroxy-2-(4-hydroxyphenyl)chroman-4-one | GRM2    |
| 928837 | (2R)-7-hydroxy-2-(4-hydroxyphenyl)chroman-4-one | GRM4    |
| 928837 | (2R)-7-hydroxy-2-(4-hydroxyphenyl)chroman-4-one | GRM5    |
| 928837 | (2R)-7-hydroxy-2-(4-hydroxyphenyl)chroman-4-one | GSK3B   |
| 928837 | (2R)-7-hydroxy-2-(4-hydroxyphenyl)chroman-4-one | HNF4A   |
| 928837 | (2R)-7-hydroxy-2-(4-hydroxyphenyl)chroman-4-one | HSD17B1 |

|        |                                                 |         |
|--------|-------------------------------------------------|---------|
| 928837 | (2R)-7-hydroxy-2-(4-hydroxyphenyl)chroman-4-one | HSD17B3 |
| 928837 | (2R)-7-hydroxy-2-(4-hydroxyphenyl)chroman-4-one | IGF1R   |
| 928837 | (2R)-7-hydroxy-2-(4-hydroxyphenyl)chroman-4-one | KLK1    |
| 928837 | (2R)-7-hydroxy-2-(4-hydroxyphenyl)chroman-4-one | KLK2    |
| 928837 | (2R)-7-hydroxy-2-(4-hydroxyphenyl)chroman-4-one | LNPEP   |
| 928837 | (2R)-7-hydroxy-2-(4-hydroxyphenyl)chroman-4-one | MAOA    |
| 928837 | (2R)-7-hydroxy-2-(4-hydroxyphenyl)chroman-4-one | MAOB    |
| 928837 | (2R)-7-hydroxy-2-(4-hydroxyphenyl)chroman-4-one | MET     |
| 928837 | (2R)-7-hydroxy-2-(4-hydroxyphenyl)chroman-4-one | MME     |
| 928837 | (2R)-7-hydroxy-2-(4-hydroxyphenyl)chroman-4-one | MMP12   |
| 928837 | (2R)-7-hydroxy-2-(4-hydroxyphenyl)chroman-4-one | MMP13   |
| 928837 | (2R)-7-hydroxy-2-(4-hydroxyphenyl)chroman-4-one | MMP2    |
| 928837 | (2R)-7-hydroxy-2-(4-hydroxyphenyl)chroman-4-one | MMP3    |
| 928837 | (2R)-7-hydroxy-2-(4-hydroxyphenyl)chroman-4-one | PDPK1   |
| 928837 | (2R)-7-hydroxy-2-(4-hydroxyphenyl)chroman-4-one | PGF     |
| 928837 | (2R)-7-hydroxy-2-(4-hydroxyphenyl)chroman-4-one | PIK3CG  |
| 928837 | (2R)-7-hydroxy-2-(4-hydroxyphenyl)chroman-4-one | PLA2G10 |
| 928837 | (2R)-7-hydroxy-2-(4-hydroxyphenyl)chroman-4-one | PLA2G1B |
| 928837 | (2R)-7-hydroxy-2-(4-hydroxyphenyl)chroman-4-one | PLA2G2A |
| 928837 | (2R)-7-hydroxy-2-(4-hydroxyphenyl)chroman-4-one | PLA2G5  |
| 928837 | (2R)-7-hydroxy-2-(4-hydroxyphenyl)chroman-4-one | PNMT    |
| 928837 | (2R)-7-hydroxy-2-(4-hydroxyphenyl)chroman-4-one | POLB    |

|        |                                                                        |          |
|--------|------------------------------------------------------------------------|----------|
| 928837 | (2R)-7-hydroxy-2-(4-hydroxyphenyl)chroman-4-one                        | PPARG    |
| 928837 | (2R)-7-hydroxy-2-(4-hydroxyphenyl)chroman-4-one                        | PRKACA   |
| 928837 | (2R)-7-hydroxy-2-(4-hydroxyphenyl)chroman-4-one                        | PTGER1   |
| 928837 | (2R)-7-hydroxy-2-(4-hydroxyphenyl)chroman-4-one                        | PTGER3   |
| 928837 | (2R)-7-hydroxy-2-(4-hydroxyphenyl)chroman-4-one                        | PTGS1    |
| 928837 | (2R)-7-hydroxy-2-(4-hydroxyphenyl)chroman-4-one                        | QDPR     |
| 928837 | (2R)-7-hydroxy-2-(4-hydroxyphenyl)chroman-4-one                        | ROCK1    |
| 928837 | (2R)-7-hydroxy-2-(4-hydroxyphenyl)chroman-4-one                        | RPS6KA3  |
| 928837 | (2R)-7-hydroxy-2-(4-hydroxyphenyl)chroman-4-one                        | RPS6KA5  |
| 928837 | (2R)-7-hydroxy-2-(4-hydroxyphenyl)chroman-4-one                        | RPS6KB1  |
| 928837 | (2R)-7-hydroxy-2-(4-hydroxyphenyl)chroman-4-one                        | RXRA     |
| 928837 | (2R)-7-hydroxy-2-(4-hydroxyphenyl)chroman-4-one                        | SERPINE1 |
| 928837 | (2R)-7-hydroxy-2-(4-hydroxyphenyl)chroman-4-one                        | SHBG     |
| 928837 | (2R)-7-hydroxy-2-(4-hydroxyphenyl)chroman-4-one                        | SLC5A2   |
| 928837 | (2R)-7-hydroxy-2-(4-hydroxyphenyl)chroman-4-one                        | SRC      |
| 928837 | (2R)-7-hydroxy-2-(4-hydroxyphenyl)chroman-4-one                        | TAS2R31  |
| 928837 | (2R)-7-hydroxy-2-(4-hydroxyphenyl)chroman-4-one                        | VEGFA    |
| 928837 | (2R)-7-hydroxy-2-(4-hydroxyphenyl)chroman-4-one                        | WEE1     |
| 193679 | (2S)-7-hydroxy-2-(4-hydroxyphenyl)-8-(3-methylbut-2-enyl)chroman-4-one | ABCC1    |
| 193679 | (2S)-7-hydroxy-2-(4-hydroxyphenyl)-8-(3-methylbut-2-enyl)chroman-4-one | ABCG2    |

|        |                                                                        |         |
|--------|------------------------------------------------------------------------|---------|
| 193679 | (2S)-7-hydroxy-2-(4-hydroxyphenyl)-8-(3-methylbut-2-enyl)chroman-4-one | ABL1    |
| 193679 | (2S)-7-hydroxy-2-(4-hydroxyphenyl)-8-(3-methylbut-2-enyl)chroman-4-one | ACHE    |
| 193679 | (2S)-7-hydroxy-2-(4-hydroxyphenyl)-8-(3-methylbut-2-enyl)chroman-4-one | ADAM17  |
| 193679 | (2S)-7-hydroxy-2-(4-hydroxyphenyl)-8-(3-methylbut-2-enyl)chroman-4-one | ADORA1  |
| 193679 | (2S)-7-hydroxy-2-(4-hydroxyphenyl)-8-(3-methylbut-2-enyl)chroman-4-one | ADORA2A |
| 193679 | (2S)-7-hydroxy-2-(4-hydroxyphenyl)-8-(3-methylbut-2-enyl)chroman-4-one | ADORA3  |
| 193679 | (2S)-7-hydroxy-2-(4-hydroxyphenyl)-8-(3-methylbut-2-enyl)chroman-4-one | ADRA2A  |
| 193679 | (2S)-7-hydroxy-2-(4-hydroxyphenyl)-8-(3-methylbut-2-enyl)chroman-4-one | ADRA2B  |
| 193679 | (2S)-7-hydroxy-2-(4-hydroxyphenyl)-8-(3-methylbut-2-enyl)chroman-4-one | ADRA2C  |
| 193679 | (2S)-7-hydroxy-2-(4-hydroxyphenyl)-8-(3-methylbut-2-enyl)chroman-4-one | AGTR1   |
| 193679 | (2S)-7-hydroxy-2-(4-hydroxyphenyl)-8-(3-methylbut-2-enyl)chroman-4-one | AKR1B10 |
| 193679 | (2S)-7-hydroxy-2-(4-hydroxyphenyl)-8-(3-methylbut-2-enyl)chroman-4-one | ANPEP   |
| 193679 | (2S)-7-hydroxy-2-(4-hydroxyphenyl)-8-(3-methylbut-2-enyl)chroman-4-one | BACE1   |
| 193679 | (2S)-7-hydroxy-2-(4-hydroxyphenyl)-8-(3-methylbut-2-enyl)chroman-4-one | BCHE    |

|        |                                                                        |        |
|--------|------------------------------------------------------------------------|--------|
| 193679 | (2S)-7-hydroxy-2-(4-hydroxyphenyl)-8-(3-methylbut-2-enyl)chroman-4-one | BCL2L1 |
| 193679 | (2S)-7-hydroxy-2-(4-hydroxyphenyl)-8-(3-methylbut-2-enyl)chroman-4-one | BRAF   |
| 193679 | (2S)-7-hydroxy-2-(4-hydroxyphenyl)-8-(3-methylbut-2-enyl)chroman-4-one | CA12   |
| 193679 | (2S)-7-hydroxy-2-(4-hydroxyphenyl)-8-(3-methylbut-2-enyl)chroman-4-one | CA4    |
| 193679 | (2S)-7-hydroxy-2-(4-hydroxyphenyl)-8-(3-methylbut-2-enyl)chroman-4-one | CA7    |
| 193679 | (2S)-7-hydroxy-2-(4-hydroxyphenyl)-8-(3-methylbut-2-enyl)chroman-4-one | CBR1   |
| 193679 | (2S)-7-hydroxy-2-(4-hydroxyphenyl)-8-(3-methylbut-2-enyl)chroman-4-one | CCNE1  |
| 193679 | (2S)-7-hydroxy-2-(4-hydroxyphenyl)-8-(3-methylbut-2-enyl)chroman-4-one | CCNE1  |
| 193679 | (2S)-7-hydroxy-2-(4-hydroxyphenyl)-8-(3-methylbut-2-enyl)chroman-4-one | CDK2   |
| 193679 | (2S)-7-hydroxy-2-(4-hydroxyphenyl)-8-(3-methylbut-2-enyl)chroman-4-one | CDK3   |
| 193679 | (2S)-7-hydroxy-2-(4-hydroxyphenyl)-8-(3-methylbut-2-enyl)chroman-4-one | CES1   |
| 193679 | (2S)-7-hydroxy-2-(4-hydroxyphenyl)-8-(3-methylbut-2-enyl)chroman-4-one | CES2   |
| 193679 | (2S)-7-hydroxy-2-(4-hydroxyphenyl)-8-(3-methylbut-2-enyl)chroman-4-one | CHEK1  |
| 193679 | (2S)-7-hydroxy-2-(4-hydroxyphenyl)-8-(3-methylbut-2-enyl)chroman-4-one | CHRNA7 |



|        |                                                                        |         |
|--------|------------------------------------------------------------------------|---------|
| 193679 | (2S)-7-hydroxy-2-(4-hydroxyphenyl)-8-(3-methylbut-2-enyl)chroman-4-one | CLK1    |
| 193679 | (2S)-7-hydroxy-2-(4-hydroxyphenyl)-8-(3-methylbut-2-enyl)chroman-4-one | CMA1    |
| 193679 | (2S)-7-hydroxy-2-(4-hydroxyphenyl)-8-(3-methylbut-2-enyl)chroman-4-one | CTSD    |
| 193679 | (2S)-7-hydroxy-2-(4-hydroxyphenyl)-8-(3-methylbut-2-enyl)chroman-4-one | CTSL    |
| 193679 | (2S)-7-hydroxy-2-(4-hydroxyphenyl)-8-(3-methylbut-2-enyl)chroman-4-one | CYP19A1 |
| 193679 | (2S)-7-hydroxy-2-(4-hydroxyphenyl)-8-(3-methylbut-2-enyl)chroman-4-one | CYP1B1  |
| 193679 | (2S)-7-hydroxy-2-(4-hydroxyphenyl)-8-(3-methylbut-2-enyl)chroman-4-one | DYRK1B  |
| 193679 | (2S)-7-hydroxy-2-(4-hydroxyphenyl)-8-(3-methylbut-2-enyl)chroman-4-one | EPHA1   |
| 193679 | (2S)-7-hydroxy-2-(4-hydroxyphenyl)-8-(3-methylbut-2-enyl)chroman-4-one | EPHA2   |
| 193679 | (2S)-7-hydroxy-2-(4-hydroxyphenyl)-8-(3-methylbut-2-enyl)chroman-4-one | EPHA3   |
| 193679 | (2S)-7-hydroxy-2-(4-hydroxyphenyl)-8-(3-methylbut-2-enyl)chroman-4-one | EPHA4   |
| 193679 | (2S)-7-hydroxy-2-(4-hydroxyphenyl)-8-(3-methylbut-2-enyl)chroman-4-one | EPHA5   |
| 193679 | (2S)-7-hydroxy-2-(4-hydroxyphenyl)-8-(3-methylbut-2-enyl)chroman-4-one | EPHA7   |
| 193679 | (2S)-7-hydroxy-2-(4-hydroxyphenyl)-8-(3-methylbut-2-enyl)chroman-4-one | EPHA8   |

|        |                                                                        |          |
|--------|------------------------------------------------------------------------|----------|
| 193679 | (2S)-7-hydroxy-2-(4-hydroxyphenyl)-8-(3-methylbut-2-enyl)chroman-4-one | EPHB1    |
| 193679 | (2S)-7-hydroxy-2-(4-hydroxyphenyl)-8-(3-methylbut-2-enyl)chroman-4-one | EPHB2    |
| 193679 | (2S)-7-hydroxy-2-(4-hydroxyphenyl)-8-(3-methylbut-2-enyl)chroman-4-one | EPHB3    |
| 193679 | (2S)-7-hydroxy-2-(4-hydroxyphenyl)-8-(3-methylbut-2-enyl)chroman-4-one | EPHB4    |
| 193679 | (2S)-7-hydroxy-2-(4-hydroxyphenyl)-8-(3-methylbut-2-enyl)chroman-4-one | ERBB2    |
| 193679 | (2S)-7-hydroxy-2-(4-hydroxyphenyl)-8-(3-methylbut-2-enyl)chroman-4-one | ESR1     |
| 193679 | (2S)-7-hydroxy-2-(4-hydroxyphenyl)-8-(3-methylbut-2-enyl)chroman-4-one | ESR2     |
| 193679 | (2S)-7-hydroxy-2-(4-hydroxyphenyl)-8-(3-methylbut-2-enyl)chroman-4-one | GCGR     |
| 193679 | (2S)-7-hydroxy-2-(4-hydroxyphenyl)-8-(3-methylbut-2-enyl)chroman-4-one | GSK3B    |
| 193679 | (2S)-7-hydroxy-2-(4-hydroxyphenyl)-8-(3-methylbut-2-enyl)chroman-4-one | HSD17B1  |
| 193679 | (2S)-7-hydroxy-2-(4-hydroxyphenyl)-8-(3-methylbut-2-enyl)chroman-4-one | HSD17B2  |
| 193679 | (2S)-7-hydroxy-2-(4-hydroxyphenyl)-8-(3-methylbut-2-enyl)chroman-4-one | HSP90AA1 |
| 193679 | (2S)-7-hydroxy-2-(4-hydroxyphenyl)-8-(3-methylbut-2-enyl)chroman-4-one | JAK1     |
| 193679 | (2S)-7-hydroxy-2-(4-hydroxyphenyl)-8-(3-methylbut-2-enyl)chroman-4-one | JAK2     |

|        |                                                                        |       |
|--------|------------------------------------------------------------------------|-------|
| 193679 | (2S)-7-hydroxy-2-(4-hydroxyphenyl)-8-(3-methylbut-2-enyl)chroman-4-one | KCNA5 |
| 193679 | (2S)-7-hydroxy-2-(4-hydroxyphenyl)-8-(3-methylbut-2-enyl)chroman-4-one | KDM1A |
| 193679 | (2S)-7-hydroxy-2-(4-hydroxyphenyl)-8-(3-methylbut-2-enyl)chroman-4-one | KDR   |
| 193679 | (2S)-7-hydroxy-2-(4-hydroxyphenyl)-8-(3-methylbut-2-enyl)chroman-4-one | KLK1  |
| 193679 | (2S)-7-hydroxy-2-(4-hydroxyphenyl)-8-(3-methylbut-2-enyl)chroman-4-one | KLK2  |
| 193679 | (2S)-7-hydroxy-2-(4-hydroxyphenyl)-8-(3-methylbut-2-enyl)chroman-4-one | LCK   |
| 193679 | (2S)-7-hydroxy-2-(4-hydroxyphenyl)-8-(3-methylbut-2-enyl)chroman-4-one | MAOB  |
| 193679 | (2S)-7-hydroxy-2-(4-hydroxyphenyl)-8-(3-methylbut-2-enyl)chroman-4-one | MET   |
| 193679 | (2S)-7-hydroxy-2-(4-hydroxyphenyl)-8-(3-methylbut-2-enyl)chroman-4-one | MMP12 |
| 193679 | (2S)-7-hydroxy-2-(4-hydroxyphenyl)-8-(3-methylbut-2-enyl)chroman-4-one | MMP13 |
| 193679 | (2S)-7-hydroxy-2-(4-hydroxyphenyl)-8-(3-methylbut-2-enyl)chroman-4-one | MMP15 |
| 193679 | (2S)-7-hydroxy-2-(4-hydroxyphenyl)-8-(3-methylbut-2-enyl)chroman-4-one | MMP16 |
| 193679 | (2S)-7-hydroxy-2-(4-hydroxyphenyl)-8-(3-methylbut-2-enyl)chroman-4-one | MMP26 |
| 193679 | (2S)-7-hydroxy-2-(4-hydroxyphenyl)-8-(3-methylbut-2-enyl)chroman-4-one | MMP3  |

|        |                                                                        |         |
|--------|------------------------------------------------------------------------|---------|
| 193679 | (2S)-7-hydroxy-2-(4-hydroxyphenyl)-8-(3-methylbut-2-enyl)chroman-4-one | MMP8    |
| 193679 | (2S)-7-hydroxy-2-(4-hydroxyphenyl)-8-(3-methylbut-2-enyl)chroman-4-one | NAAA    |
| 193679 | (2S)-7-hydroxy-2-(4-hydroxyphenyl)-8-(3-methylbut-2-enyl)chroman-4-one | NEK1    |
| 193679 | (2S)-7-hydroxy-2-(4-hydroxyphenyl)-8-(3-methylbut-2-enyl)chroman-4-one | NR1H4   |
| 193679 | (2S)-7-hydroxy-2-(4-hydroxyphenyl)-8-(3-methylbut-2-enyl)chroman-4-one | ODC1    |
| 193679 | (2S)-7-hydroxy-2-(4-hydroxyphenyl)-8-(3-methylbut-2-enyl)chroman-4-one | OPRD1   |
| 193679 | (2S)-7-hydroxy-2-(4-hydroxyphenyl)-8-(3-methylbut-2-enyl)chroman-4-one | PDE7A   |
| 193679 | (2S)-7-hydroxy-2-(4-hydroxyphenyl)-8-(3-methylbut-2-enyl)chroman-4-one | PITRM1  |
| 193679 | (2S)-7-hydroxy-2-(4-hydroxyphenyl)-8-(3-methylbut-2-enyl)chroman-4-one | PLA2G1B |
| 193679 | (2S)-7-hydroxy-2-(4-hydroxyphenyl)-8-(3-methylbut-2-enyl)chroman-4-one | PLA2G2A |
| 193679 | (2S)-7-hydroxy-2-(4-hydroxyphenyl)-8-(3-methylbut-2-enyl)chroman-4-one | PLA2G5  |
| 193679 | (2S)-7-hydroxy-2-(4-hydroxyphenyl)-8-(3-methylbut-2-enyl)chroman-4-one | PLA2G7  |
| 193679 | (2S)-7-hydroxy-2-(4-hydroxyphenyl)-8-(3-methylbut-2-enyl)chroman-4-one | POLB    |
| 193679 | (2S)-7-hydroxy-2-(4-hydroxyphenyl)-8-(3-methylbut-2-enyl)chroman-4-one | PPARG   |

|        |                                                                        |         |
|--------|------------------------------------------------------------------------|---------|
| 193679 | (2S)-7-hydroxy-2-(4-hydroxyphenyl)-8-(3-methylbut-2-enyl)chroman-4-one | PRKCZ   |
| 193679 | (2S)-7-hydroxy-2-(4-hydroxyphenyl)-8-(3-methylbut-2-enyl)chroman-4-one | PTGS1   |
| 193679 | (2S)-7-hydroxy-2-(4-hydroxyphenyl)-8-(3-methylbut-2-enyl)chroman-4-one | PTGS2   |
| 193679 | (2S)-7-hydroxy-2-(4-hydroxyphenyl)-8-(3-methylbut-2-enyl)chroman-4-one | PTPN1   |
| 193679 | (2S)-7-hydroxy-2-(4-hydroxyphenyl)-8-(3-methylbut-2-enyl)chroman-4-one | RET     |
| 193679 | (2S)-7-hydroxy-2-(4-hydroxyphenyl)-8-(3-methylbut-2-enyl)chroman-4-one | RPS6KA3 |
| 193679 | (2S)-7-hydroxy-2-(4-hydroxyphenyl)-8-(3-methylbut-2-enyl)chroman-4-one | RXRA    |
| 193679 | (2S)-7-hydroxy-2-(4-hydroxyphenyl)-8-(3-methylbut-2-enyl)chroman-4-one | SHBG    |
| 193679 | (2S)-7-hydroxy-2-(4-hydroxyphenyl)-8-(3-methylbut-2-enyl)chroman-4-one | SLC5A2  |
| 193679 | (2S)-7-hydroxy-2-(4-hydroxyphenyl)-8-(3-methylbut-2-enyl)chroman-4-one | TAOK1   |
| 193679 | (2S)-7-hydroxy-2-(4-hydroxyphenyl)-8-(3-methylbut-2-enyl)chroman-4-one | TAOK3   |
| 193679 | (2S)-7-hydroxy-2-(4-hydroxyphenyl)-8-(3-methylbut-2-enyl)chroman-4-one | TAS2R31 |
| 193679 | (2S)-7-hydroxy-2-(4-hydroxyphenyl)-8-(3-methylbut-2-enyl)chroman-4-one | TBXA2R  |
| 193679 | (2S)-7-hydroxy-2-(4-hydroxyphenyl)-8-(3-methylbut-2-enyl)chroman-4-one | TNKS    |

|        |                                                                        |         |
|--------|------------------------------------------------------------------------|---------|
| 193679 | (2S)-7-hydroxy-2-(4-hydroxyphenyl)-8-(3-methylbut-2-enyl)chroman-4-one | TNKS2   |
| 193679 | (2S)-7-hydroxy-2-(4-hydroxyphenyl)-8-(3-methylbut-2-enyl)chroman-4-one | WEE1    |
| 124050 | Isoglycyrol                                                            | AGTR1   |
| 124050 | Isoglycyrol                                                            | APP     |
| 124050 | Isoglycyrol                                                            | CA1     |
| 124050 | Isoglycyrol                                                            | CA2     |
| 124050 | Isoglycyrol                                                            | CCNB1   |
| 124050 | Isoglycyrol                                                            | CCNB2   |
| 124050 | Isoglycyrol                                                            | CCNB3   |
| 124050 | Isoglycyrol                                                            | CDK1    |
| 124050 | Isoglycyrol                                                            | CES1    |
| 124050 | Isoglycyrol                                                            | CES2    |
| 124050 | Isoglycyrol                                                            | CHEK1   |
| 124050 | Isoglycyrol                                                            | CHRNA7  |
| 124050 | Isoglycyrol                                                            | COMT    |
| 124050 | Isoglycyrol                                                            | EGFR    |
| 124050 | Isoglycyrol                                                            | ERN1    |
| 124050 | Isoglycyrol                                                            | FLT3    |
| 124050 | Isoglycyrol                                                            | HDAC10  |
| 124050 | Isoglycyrol                                                            | HDAC11  |
| 124050 | Isoglycyrol                                                            | HDAC2   |
| 124050 | Isoglycyrol                                                            | HDAC3   |
| 124050 | Isoglycyrol                                                            | HDAC4   |
| 124050 | Isoglycyrol                                                            | HDAC5   |
| 124050 | Isoglycyrol                                                            | HDAC7   |
| 124050 | Isoglycyrol                                                            | HDAC9   |
| 124050 | Isoglycyrol                                                            | HPGDS   |
| 124050 | Isoglycyrol                                                            | HSD17B1 |
| 124050 | Isoglycyrol                                                            | HTR3A   |
| 124050 | Isoglycyrol                                                            | IMPDH2  |
| 124050 | Isoglycyrol                                                            | KCNA3   |
| 124050 | Isoglycyrol                                                            | KDR     |
| 124050 | Isoglycyrol                                                            | MET     |
| 124050 | Isoglycyrol                                                            | MMP1    |
| 124050 | Isoglycyrol                                                            | MMP13   |
| 124050 | Isoglycyrol                                                            | MMP2    |
| 124050 | Isoglycyrol                                                            | MMP8    |
| 124050 | Isoglycyrol                                                            | MMP9    |
| 124050 | Isoglycyrol                                                            | ODC1    |
| 124050 | Isoglycyrol                                                            | P2RX3   |

|         |                 |         |
|---------|-----------------|---------|
| 124050  | Isoglycyrol     | PDE4A   |
| 124050  | Isoglycyrol     | PDE4B   |
| 124050  | Isoglycyrol     | PDE4C   |
| 124050  | Isoglycyrol     | PDE4D   |
| 124050  | Isoglycyrol     | PLK1    |
| 124050  | Isoglycyrol     | PPARG   |
| 124050  | Isoglycyrol     | PTPN1   |
| 124050  | Isoglycyrol     | ROCK2   |
| 124050  | Isoglycyrol     | SCN9A   |
| 124050  | Isoglycyrol     | SRC     |
| 5318585 | Isolicoflavonol | ABCB1   |
| 5318585 | Isolicoflavonol | ABCC1   |
| 5318585 | Isolicoflavonol | ABCG2   |
| 5318585 | Isolicoflavonol | ACHE    |
| 5318585 | Isolicoflavonol | ADORA1  |
| 5318585 | Isolicoflavonol | ADORA2A |
| 5318585 | Isolicoflavonol | ADORA3  |
| 5318585 | Isolicoflavonol | AHR     |
| 5318585 | Isolicoflavonol | AKR1A1  |
| 5318585 | Isolicoflavonol | AKR1B1  |
| 5318585 | Isolicoflavonol | AKR1B10 |
| 5318585 | Isolicoflavonol | AKR1C1  |
| 5318585 | Isolicoflavonol | AKR1C2  |
| 5318585 | Isolicoflavonol | AKR1C3  |
| 5318585 | Isolicoflavonol | AKR1C4  |
| 5318585 | Isolicoflavonol | AKT1    |
| 5318585 | Isolicoflavonol | ALK     |
| 5318585 | Isolicoflavonol | ALOX12  |
| 5318585 | Isolicoflavonol | ALOX15  |
| 5318585 | Isolicoflavonol | ALOX5   |
| 5318585 | Isolicoflavonol | AMY1A   |
| 5318585 | Isolicoflavonol | APEX1   |
| 5318585 | Isolicoflavonol | AR      |
| 5318585 | Isolicoflavonol | ARG1    |
| 5318585 | Isolicoflavonol | AURKB   |
| 5318585 | Isolicoflavonol | AVPR2   |
| 5318585 | Isolicoflavonol | AXL     |
| 5318585 | Isolicoflavonol | BACE1   |
| 5318585 | Isolicoflavonol | BCHE    |
| 5318585 | Isolicoflavonol | BCL2    |
| 5318585 | Isolicoflavonol | BCL2L1  |
| 5318585 | Isolicoflavonol | CA1     |
| 5318585 | Isolicoflavonol | CA12    |
| 5318585 | Isolicoflavonol | CA13    |

|         |                 |          |
|---------|-----------------|----------|
| 5318585 | Isolicoflavonol | CA2      |
| 5318585 | Isolicoflavonol | CA3      |
| 5318585 | Isolicoflavonol | CA4      |
| 5318585 | Isolicoflavonol | CA5A     |
| 5318585 | Isolicoflavonol | CA7      |
| 5318585 | Isolicoflavonol | CA9      |
| 5318585 | Isolicoflavonol | CAMK2B   |
| 5318585 | Isolicoflavonol | CCNB1    |
| 5318585 | Isolicoflavonol | CCNB2    |
| 5318585 | Isolicoflavonol | CCNB3    |
| 5318585 | Isolicoflavonol | CDK1     |
| 5318585 | Isolicoflavonol | CDK1     |
| 5318585 | Isolicoflavonol | CDK2     |
| 5318585 | Isolicoflavonol | CDK5     |
| 5318585 | Isolicoflavonol | CDK5R1   |
| 5318585 | Isolicoflavonol | CDK6     |
| 5318585 | Isolicoflavonol | CFTR     |
| 5318585 | Isolicoflavonol | CSNK2A1  |
| 5318585 | Isolicoflavonol | CYP19A1  |
| 5318585 | Isolicoflavonol | CYP1B1   |
| 5318585 | Isolicoflavonol | DAPK1    |
| 5318585 | Isolicoflavonol | DRD4     |
| 5318585 | Isolicoflavonol | EGFR     |
| 5318585 | Isolicoflavonol | ESR1     |
| 5318585 | Isolicoflavonol | ESR2     |
| 5318585 | Isolicoflavonol | ESRRA    |
| 5318585 | Isolicoflavonol | F2       |
| 5318585 | Isolicoflavonol | FLT3     |
| 5318585 | Isolicoflavonol | GCGR     |
| 5318585 | Isolicoflavonol | GLO1     |
| 5318585 | Isolicoflavonol | GSK3B    |
| 5318585 | Isolicoflavonol | HSD17B1  |
| 5318585 | Isolicoflavonol | HSD17B2  |
| 5318585 | Isolicoflavonol | HSP90AA1 |
| 5318585 | Isolicoflavonol | HSP90AB1 |
| 5318585 | Isolicoflavonol | IGF1R    |
| 5318585 | Isolicoflavonol | INSR     |
| 5318585 | Isolicoflavonol | KDM4E    |
| 5318585 | Isolicoflavonol | KDR      |
| 5318585 | Isolicoflavonol | MAOA     |
| 5318585 | Isolicoflavonol | MAPT     |
| 5318585 | Isolicoflavonol | MPG      |
| 5318585 | Isolicoflavonol | MPO      |
| 5318585 | Isolicoflavonol | MYLK     |



|         |                 |          |
|---------|-----------------|----------|
| 5318585 | Isolicoflavonol | NAE1     |
| 5318585 | Isolicoflavonol | NEK2     |
| 5318585 | Isolicoflavonol | NEK6     |
| 5318585 | Isolicoflavonol | NOX4     |
| 5318585 | Isolicoflavonol | NUAK1    |
| 5318585 | Isolicoflavonol | OPRD1    |
| 5318585 | Isolicoflavonol | PDE5A    |
| 5318585 | Isolicoflavonol | PFKFB3   |
| 5318585 | Isolicoflavonol | PIK3R1   |
| 5318585 | Isolicoflavonol | PIM1     |
| 5318585 | Isolicoflavonol | PKN1     |
| 5318585 | Isolicoflavonol | PLA2G1B  |
| 5318585 | Isolicoflavonol | PLK1     |
| 5318585 | Isolicoflavonol | PTK2     |
| 5318585 | Isolicoflavonol | PTPN1    |
| 5318585 | Isolicoflavonol | PYGL     |
| 5318585 | Isolicoflavonol | RAF1     |
| 5318585 | Isolicoflavonol | SLC22A12 |
| 5318585 | Isolicoflavonol | SRC      |
| 5318585 | Isolicoflavonol | SYK      |
| 5318585 | Isolicoflavonol | TNKS     |
| 5318585 | Isolicoflavonol | TNKS2    |
| 5318585 | Isolicoflavonol | TOP2A    |
| 5318585 | Isolicoflavonol | TTR      |
| 5318585 | Isolicoflavonol | TYR      |
| 5318585 | Isolicoflavonol | XDH      |
| 5281654 | isorhamnetin    | ABCB1    |
| 5281654 | isorhamnetin    | ABCC1    |
| 5281654 | isorhamnetin    | ABCG2    |
| 5281654 | isorhamnetin    | ACHE     |
| 5281654 | isorhamnetin    | ADORA1   |
| 5281654 | isorhamnetin    | ADORA2A  |
| 5281654 | isorhamnetin    | AHR      |
| 5281654 | isorhamnetin    | AKR1A1   |
| 5281654 | isorhamnetin    | AKR1B1   |
| 5281654 | isorhamnetin    | AKR1B10  |
| 5281654 | isorhamnetin    | AKR1C1   |
| 5281654 | isorhamnetin    | AKR1C2   |
| 5281654 | isorhamnetin    | AKR1C3   |
| 5281654 | isorhamnetin    | AKR1C4   |
| 5281654 | isorhamnetin    | AKT1     |
| 5281654 | isorhamnetin    | ALK      |
| 5281654 | isorhamnetin    | ALOX12   |
| 5281654 | isorhamnetin    | ALOX15   |

|         |              |         |
|---------|--------------|---------|
| 5281654 | isorhamnetin | ALOX5   |
| 5281654 | isorhamnetin | APEX1   |
| 5281654 | isorhamnetin | APP     |
| 5281654 | isorhamnetin | ARG1    |
| 5281654 | isorhamnetin | AURKB   |
| 5281654 | isorhamnetin | AVPR2   |
| 5281654 | isorhamnetin | AXL     |
| 5281654 | isorhamnetin | BACE1   |
| 5281654 | isorhamnetin | CA1     |
| 5281654 | isorhamnetin | CA12    |
| 5281654 | isorhamnetin | CA13    |
| 5281654 | isorhamnetin | CA14    |
| 5281654 | isorhamnetin | CA2     |
| 5281654 | isorhamnetin | CA3     |
| 5281654 | isorhamnetin | CA4     |
| 5281654 | isorhamnetin | CA5A    |
| 5281654 | isorhamnetin | CA6     |
| 5281654 | isorhamnetin | CA7     |
| 5281654 | isorhamnetin | CA9     |
| 5281654 | isorhamnetin | CAMK2B  |
| 5281654 | isorhamnetin | CCNB1   |
| 5281654 | isorhamnetin | CCNB2   |
| 5281654 | isorhamnetin | CCNB3   |
| 5281654 | isorhamnetin | CD38    |
| 5281654 | isorhamnetin | CDK1    |
| 5281654 | isorhamnetin | CDK1    |
| 5281654 | isorhamnetin | CDK2    |
| 5281654 | isorhamnetin | CDK5    |
| 5281654 | isorhamnetin | CDK5R1  |
| 5281654 | isorhamnetin | CDK6    |
| 5281654 | isorhamnetin | CSNK2A1 |
| 5281654 | isorhamnetin | CXCR1   |
| 5281654 | isorhamnetin | CYP19A1 |
| 5281654 | isorhamnetin | CYP11B1 |
| 5281654 | isorhamnetin | DAPK1   |
| 5281654 | isorhamnetin | DRD4    |
| 5281654 | isorhamnetin | EGFR    |
| 5281654 | isorhamnetin | ESR2    |
| 5281654 | isorhamnetin | ESRRA   |
| 5281654 | isorhamnetin | F2      |
| 5281654 | isorhamnetin | FLT3    |
| 5281654 | isorhamnetin | GLO1    |
| 5281654 | isorhamnetin | GPR35   |
| 5281654 | isorhamnetin | GSK3B   |

|         |              |          |
|---------|--------------|----------|
| 5281654 | isorhamnetin | HSD17B1  |
| 5281654 | isorhamnetin | HSD17B2  |
| 5281654 | isorhamnetin | IGF1R    |
| 5281654 | isorhamnetin | INSR     |
| 5281654 | isorhamnetin | KDM4E    |
| 5281654 | isorhamnetin | KDR      |
| 5281654 | isorhamnetin | MAOA     |
| 5281654 | isorhamnetin | MAPT     |
| 5281654 | isorhamnetin | MCL1     |
| 5281654 | isorhamnetin | MET      |
| 5281654 | isorhamnetin | MMP12    |
| 5281654 | isorhamnetin | MMP13    |
| 5281654 | isorhamnetin | MMP2     |
| 5281654 | isorhamnetin | MMP3     |
| 5281654 | isorhamnetin | MMP9     |
| 5281654 | isorhamnetin | MPG      |
| 5281654 | isorhamnetin | MPO      |
| 5281654 | isorhamnetin | MYLK     |
| 5281654 | isorhamnetin | NEK2     |
| 5281654 | isorhamnetin | NEK6     |
| 5281654 | isorhamnetin | NOX4     |
| 5281654 | isorhamnetin | NUAK1    |
| 5281654 | isorhamnetin | PARP1    |
| 5281654 | isorhamnetin | PIK3CG   |
| 5281654 | isorhamnetin | PIK3R1   |
| 5281654 | isorhamnetin | PIM1     |
| 5281654 | isorhamnetin | PKN1     |
| 5281654 | isorhamnetin | PLA2G1B  |
| 5281654 | isorhamnetin | PLG      |
| 5281654 | isorhamnetin | PLK1     |
| 5281654 | isorhamnetin | PTK2     |
| 5281654 | isorhamnetin | PTPRS    |
| 5281654 | isorhamnetin | PYGL     |
| 5281654 | isorhamnetin | SLC22A12 |
| 5281654 | isorhamnetin | SRC      |
| 5281654 | isorhamnetin | SYK      |
| 5281654 | isorhamnetin | TERT     |
| 5281654 | isorhamnetin | TNKS2    |
| 5281654 | isorhamnetin | TOP2A    |
| 5281654 | isorhamnetin | TTR      |
| 5281654 | isorhamnetin | TYR      |
| 5281654 | isorhamnetin | XDH      |
| 3764    | HMO          | ABCB1    |
| 3764    | HMO          | ABCG2    |

|      |     |         |
|------|-----|---------|
| 3764 | HMO | ABL1    |
| 3764 | HMO | ACHE    |
| 3764 | HMO | ADAM17  |
| 3764 | HMO | ADORA1  |
| 3764 | HMO | ADORA2A |
| 3764 | HMO | ALDH2   |
| 3764 | HMO | ALOX12  |
| 3764 | HMO | ALOX15  |
| 3764 | HMO | ALPG    |
| 3764 | HMO | ALPL    |
| 3764 | HMO | AURKA   |
| 3764 | HMO | BACE1   |
| 3764 | HMO | BMP1    |
| 3764 | HMO | CA1     |
| 3764 | HMO | CA12    |
| 3764 | HMO | CA13    |
| 3764 | HMO | CA14    |
| 3764 | HMO | CA2     |
| 3764 | HMO | CA3     |
| 3764 | HMO | CA4     |
| 3764 | HMO | CA5A    |
| 3764 | HMO | CA5B    |
| 3764 | HMO | CA6     |
| 3764 | HMO | CA7     |
| 3764 | HMO | CA9     |
| 3764 | HMO | CBR1    |
| 3764 | HMO | CCNA1   |
| 3764 | HMO | CCNA2   |
| 3764 | HMO | CDC25A  |
| 3764 | HMO | CDC25B  |
| 3764 | HMO | CDK2    |
| 3764 | HMO | CDK4    |
| 3764 | HMO | CHEK1   |
| 3764 | HMO | CHRNA7  |
| 3764 | HMO | CYP19A1 |
| 3764 | HMO | DRD1    |
| 3764 | HMO | EGFR    |
| 3764 | HMO | EPHB2   |
| 3764 | HMO | EPHB4   |
| 3764 | HMO | ESR1    |
| 3764 | HMO | ESR2    |
| 3764 | HMO | ESRRA   |
| 3764 | HMO | ESRRB   |
| 3764 | HMO | EZR     |

|      |     |          |
|------|-----|----------|
| 3764 | HMO | FGFR1    |
| 3764 | HMO | FLT1     |
| 3764 | HMO | GRIA1    |
| 3764 | HMO | GRM4     |
| 3764 | HMO | GSK3A    |
| 3764 | HMO | HCK      |
| 3764 | HMO | HDAC1    |
| 3764 | HMO | HDAC10   |
| 3764 | HMO | HDAC11   |
| 3764 | HMO | HDAC3    |
| 3764 | HMO | HDAC6    |
| 3764 | HMO | HSD17B1  |
| 3764 | HMO | HSD17B2  |
| 3764 | HMO | HTR2A    |
| 3764 | HMO | HTR2C    |
| 3764 | HMO | IL2      |
| 3764 | HMO | KDM1A    |
| 3764 | HMO | MAOA     |
| 3764 | HMO | MAOB     |
| 3764 | HMO | MAP2K1   |
| 3764 | HMO | MAPKAPK2 |
| 3764 | HMO | MARK1    |
| 3764 | HMO | MGAM     |
| 3764 | HMO | MIF      |
| 3764 | HMO | MMP1     |
| 3764 | HMO | MMP14    |
| 3764 | HMO | MMP16    |
| 3764 | HMO | MMP25    |
| 3764 | HMO | MMP8     |
| 3764 | HMO | NCOR2    |
| 3764 | HMO | NOX4     |
| 3764 | HMO | PDE4A    |
| 3764 | HMO | PDE4B    |
| 3764 | HMO | PDE4C    |
| 3764 | HMO | PDPK1    |
| 3764 | HMO | PFKFB3   |
| 3764 | HMO | PI4KB    |
| 3764 | HMO | PIM2     |
| 3764 | HMO | PLAA     |
| 3764 | HMO | PON1     |
| 3764 | HMO | PPARA    |
| 3764 | HMO | PTGS1    |
| 3764 | HMO | PTK6     |
| 3764 | HMO | PTPN1    |

|        |                       |         |
|--------|-----------------------|---------|
| 3764   | HMO                   | PTPRS   |
| 3764   | HMO                   | RET     |
| 3764   | HMO                   | ROCK1   |
| 3764   | HMO                   | RPS6KA2 |
| 3764   | HMO                   | RPS6KB1 |
| 3764   | HMO                   | SLC6A2  |
| 3764   | HMO                   | SLC9A1  |
| 3764   | HMO                   | TBXAS1  |
| 3764   | HMO                   | TLR9    |
| 3764   | HMO                   | TRPM8   |
| 3764   | HMO                   | TYR     |
| 3764   | HMO                   | WEE1    |
| 3764   | HMO                   | XDH     |
| 480873 | 1-Methoxyphaseollidin | ABL1    |
| 480873 | 1-Methoxyphaseollidin | ADAM17  |
| 480873 | 1-Methoxyphaseollidin | ADORA2B |
| 480873 | 1-Methoxyphaseollidin | AGTR1   |
| 480873 | 1-Methoxyphaseollidin | AKR1B10 |
| 480873 | 1-Methoxyphaseollidin | AR      |
| 480873 | 1-Methoxyphaseollidin | AURKA   |
| 480873 | 1-Methoxyphaseollidin | AURKB   |
| 480873 | 1-Methoxyphaseollidin | AVPR1A  |
| 480873 | 1-Methoxyphaseollidin | BACE1   |
| 480873 | 1-Methoxyphaseollidin | BRAF    |
| 480873 | 1-Methoxyphaseollidin | CA14    |
| 480873 | 1-Methoxyphaseollidin | CCNB1   |
| 480873 | 1-Methoxyphaseollidin | CCND1   |
| 480873 | 1-Methoxyphaseollidin | CCNE1   |
| 480873 | 1-Methoxyphaseollidin | CCNE1   |
| 480873 | 1-Methoxyphaseollidin | CCNE1   |
| 480873 | 1-Methoxyphaseollidin | CCNE2   |
| 480873 | 1-Methoxyphaseollidin | CDK1    |
| 480873 | 1-Methoxyphaseollidin | CDK2    |
| 480873 | 1-Methoxyphaseollidin | CDK2    |
| 480873 | 1-Methoxyphaseollidin | CDK3    |
| 480873 | 1-Methoxyphaseollidin | CDK4    |
| 480873 | 1-Methoxyphaseollidin | CFD     |
| 480873 | 1-Methoxyphaseollidin | CHEK1   |
| 480873 | 1-Methoxyphaseollidin | CLK1    |
| 480873 | 1-Methoxyphaseollidin | CMA1    |
| 480873 | 1-Methoxyphaseollidin | CSF1R   |
| 480873 | 1-Methoxyphaseollidin | CSNK1G1 |
| 480873 | 1-Methoxyphaseollidin | CTSD    |
| 480873 | 1-Methoxyphaseollidin | CTSK    |

|        |                       |          |
|--------|-----------------------|----------|
| 480873 | 1-Methoxyphaseollidin | CYP19A1  |
| 480873 | 1-Methoxyphaseollidin | DNM1     |
| 480873 | 1-Methoxyphaseollidin | DRD1     |
| 480873 | 1-Methoxyphaseollidin | DYRK1B   |
| 480873 | 1-Methoxyphaseollidin | EPHA1    |
| 480873 | 1-Methoxyphaseollidin | EPHA2    |
| 480873 | 1-Methoxyphaseollidin | EPHA3    |
| 480873 | 1-Methoxyphaseollidin | EPHA4    |
| 480873 | 1-Methoxyphaseollidin | EPHA5    |
| 480873 | 1-Methoxyphaseollidin | EPHA7    |
| 480873 | 1-Methoxyphaseollidin | EPHA8    |
| 480873 | 1-Methoxyphaseollidin | EPHB1    |
| 480873 | 1-Methoxyphaseollidin | EPHB2    |
| 480873 | 1-Methoxyphaseollidin | EPHB3    |
| 480873 | 1-Methoxyphaseollidin | EPHB4    |
| 480873 | 1-Methoxyphaseollidin | ESR1     |
| 480873 | 1-Methoxyphaseollidin | ESR2     |
| 480873 | 1-Methoxyphaseollidin | GCGR     |
| 480873 | 1-Methoxyphaseollidin | GRK2     |
| 480873 | 1-Methoxyphaseollidin | HDAC1    |
| 480873 | 1-Methoxyphaseollidin | HDAC2    |
| 480873 | 1-Methoxyphaseollidin | HDAC3    |
| 480873 | 1-Methoxyphaseollidin | HDAC4    |
| 480873 | 1-Methoxyphaseollidin | HDAC5    |
| 480873 | 1-Methoxyphaseollidin | HDAC6    |
| 480873 | 1-Methoxyphaseollidin | HDAC7    |
| 480873 | 1-Methoxyphaseollidin | HDAC8    |
| 480873 | 1-Methoxyphaseollidin | HSD11B1  |
| 480873 | 1-Methoxyphaseollidin | HSD17B2  |
| 480873 | 1-Methoxyphaseollidin | HSP90AA1 |
| 480873 | 1-Methoxyphaseollidin | HTR2C    |
| 480873 | 1-Methoxyphaseollidin | HTR7     |
| 480873 | 1-Methoxyphaseollidin | IMPDH1   |
| 480873 | 1-Methoxyphaseollidin | IMPDH2   |
| 480873 | 1-Methoxyphaseollidin | KDM1A    |
| 480873 | 1-Methoxyphaseollidin | LCK      |
| 480873 | 1-Methoxyphaseollidin | MAPK1    |
| 480873 | 1-Methoxyphaseollidin | MAPK8    |
| 480873 | 1-Methoxyphaseollidin | MAPKAPK2 |
| 480873 | 1-Methoxyphaseollidin | MMP1     |
| 480873 | 1-Methoxyphaseollidin | MMP10    |
| 480873 | 1-Methoxyphaseollidin | MMP3     |
| 480873 | 1-Methoxyphaseollidin | MMP8     |
| 480873 | 1-Methoxyphaseollidin | OPRK1    |

|         |                       |         |
|---------|-----------------------|---------|
| 480873  | 1-Methoxyphaseollidin | P2RX3   |
| 480873  | 1-Methoxyphaseollidin | P2RX7   |
| 480873  | 1-Methoxyphaseollidin | PARP1   |
| 480873  | 1-Methoxyphaseollidin | PDPK1   |
| 480873  | 1-Methoxyphaseollidin | PIK3CA  |
| 480873  | 1-Methoxyphaseollidin | PIK3CD  |
| 480873  | 1-Methoxyphaseollidin | PIM1    |
| 480873  | 1-Methoxyphaseollidin | PIM2    |
| 480873  | 1-Methoxyphaseollidin | PITRM1  |
| 480873  | 1-Methoxyphaseollidin | PLK1    |
| 480873  | 1-Methoxyphaseollidin | PTGS1   |
| 480873  | 1-Methoxyphaseollidin | PTPN1   |
| 480873  | 1-Methoxyphaseollidin | RAF1    |
| 480873  | 1-Methoxyphaseollidin | RET     |
| 480873  | 1-Methoxyphaseollidin | ROCK1   |
| 480873  | 1-Methoxyphaseollidin | RPS6KA1 |
| 480873  | 1-Methoxyphaseollidin | RPS6KB1 |
| 480873  | 1-Methoxyphaseollidin | SGK1    |
| 480873  | 1-Methoxyphaseollidin | SIGMAR1 |
| 480873  | 1-Methoxyphaseollidin | SLC29A1 |
| 480873  | 1-Methoxyphaseollidin | SPHK1   |
| 480873  | 1-Methoxyphaseollidin | SPHK2   |
| 480873  | 1-Methoxyphaseollidin | SYK     |
| 480873  | 1-Methoxyphaseollidin | TGM2    |
| 480873  | 1-Methoxyphaseollidin | TKT     |
| 480873  | 1-Methoxyphaseollidin | TNF     |
| 480873  | 1-Methoxyphaseollidin | TRPM8   |
| 480873  | 1-Methoxyphaseollidin | TUBB1   |
| 480873  | 1-Methoxyphaseollidin | TYMS    |
| 480873  | 1-Methoxyphaseollidin | TYR     |
| 480873  | 1-Methoxyphaseollidin | WEE1    |
| 5316900 | Quercetin der         | ABCB1   |
| 5316900 | Quercetin der         | ABCC1   |
| 5316900 | Quercetin der         | ABCG2   |
| 5316900 | Quercetin der         | ACHE    |
| 5316900 | Quercetin der         | ADORA1  |
| 5316900 | Quercetin der         | ADORA2A |
| 5316900 | Quercetin der         | ADORA3  |
| 5316900 | Quercetin der         | AHR     |
| 5316900 | Quercetin der         | AKR1A1  |
| 5316900 | Quercetin der         | AKR1B1  |
| 5316900 | Quercetin der         | AKR1C1  |
| 5316900 | Quercetin der         | AKR1C2  |
| 5316900 | Quercetin der         | AKR1C3  |



|         |               |         |
|---------|---------------|---------|
| 5316900 | Quercetin der | AKR1C4  |
| 5316900 | Quercetin der | AKT1    |
| 5316900 | Quercetin der | ALK     |
| 5316900 | Quercetin der | ALOX12  |
| 5316900 | Quercetin der | ALOX15  |
| 5316900 | Quercetin der | ALOX5   |
| 5316900 | Quercetin der | APEX1   |
| 5316900 | Quercetin der | APP     |
| 5316900 | Quercetin der | ARG1    |
| 5316900 | Quercetin der | AURKB   |
| 5316900 | Quercetin der | AVPR2   |
| 5316900 | Quercetin der | AXL     |
| 5316900 | Quercetin der | BACE1   |
| 5316900 | Quercetin der | CA1     |
| 5316900 | Quercetin der | CA12    |
| 5316900 | Quercetin der | CA13    |
| 5316900 | Quercetin der | CA14    |
| 5316900 | Quercetin der | CA2     |
| 5316900 | Quercetin der | CA3     |
| 5316900 | Quercetin der | CA4     |
| 5316900 | Quercetin der | CA5A    |
| 5316900 | Quercetin der | CA6     |
| 5316900 | Quercetin der | CA7     |
| 5316900 | Quercetin der | CA9     |
| 5316900 | Quercetin der | CAMK2B  |
| 5316900 | Quercetin der | CCNB1   |
| 5316900 | Quercetin der | CCNB2   |
| 5316900 | Quercetin der | CCNB3   |
| 5316900 | Quercetin der | CDK1    |
| 5316900 | Quercetin der | CDK1    |
| 5316900 | Quercetin der | CDK2    |
| 5316900 | Quercetin der | CDK5    |
| 5316900 | Quercetin der | CDK5R1  |
| 5316900 | Quercetin der | CDK6    |
| 5316900 | Quercetin der | CSNK2A1 |
| 5316900 | Quercetin der | CXCR1   |
| 5316900 | Quercetin der | CYP19A1 |
| 5316900 | Quercetin der | CYP1B1  |
| 5316900 | Quercetin der | DAPK1   |
| 5316900 | Quercetin der | DRD4    |
| 5316900 | Quercetin der | EGFR    |
| 5316900 | Quercetin der | ESR1    |
| 5316900 | Quercetin der | ESR2    |
| 5316900 | Quercetin der | ESRRA   |

|         |               |          |
|---------|---------------|----------|
| 5316900 | Quercetin der | F2       |
| 5316900 | Quercetin der | FLT3     |
| 5316900 | Quercetin der | GLO1     |
| 5316900 | Quercetin der | GPR35    |
| 5316900 | Quercetin der | GSK3B    |
| 5316900 | Quercetin der | HSD17B1  |
| 5316900 | Quercetin der | HSD17B2  |
| 5316900 | Quercetin der | IGF1R    |
| 5316900 | Quercetin der | INSR     |
| 5316900 | Quercetin der | KDM4E    |
| 5316900 | Quercetin der | KDR      |
| 5316900 | Quercetin der | KIT      |
| 5316900 | Quercetin der | MAOA     |
| 5316900 | Quercetin der | MAPT     |
| 5316900 | Quercetin der | MCL1     |
| 5316900 | Quercetin der | MET      |
| 5316900 | Quercetin der | MMP13    |
| 5316900 | Quercetin der | MMP2     |
| 5316900 | Quercetin der | MMP3     |
| 5316900 | Quercetin der | MMP9     |
| 5316900 | Quercetin der | MPO      |
| 5316900 | Quercetin der | MYLK     |
| 5316900 | Quercetin der | NEK2     |
| 5316900 | Quercetin der | NEK6     |
| 5316900 | Quercetin der | NOS2     |
| 5316900 | Quercetin der | NOX4     |
| 5316900 | Quercetin der | NUAK1    |
| 5316900 | Quercetin der | OPRD1    |
| 5316900 | Quercetin der | OPRM1    |
| 5316900 | Quercetin der | PIK3CG   |
| 5316900 | Quercetin der | PIK3R1   |
| 5316900 | Quercetin der | PIM1     |
| 5316900 | Quercetin der | PKN1     |
| 5316900 | Quercetin der | PLA2G1B  |
| 5316900 | Quercetin der | PLA2G2A  |
| 5316900 | Quercetin der | PLG      |
| 5316900 | Quercetin der | PLK1     |
| 5316900 | Quercetin der | PTK2     |
| 5316900 | Quercetin der | PYGL     |
| 5316900 | Quercetin der | SLC22A12 |
| 5316900 | Quercetin der | SRC      |
| 5316900 | Quercetin der | ST6GAL1  |
| 5316900 | Quercetin der | SYK      |
| 5316900 | Quercetin der | TERT     |

|          |                                 |         |
|----------|---------------------------------|---------|
| 5316900  | Quercetin der                   | TOP2A   |
| 5316900  | Quercetin der                   | TYR     |
| 5316900  | Quercetin der                   | XDH     |
| 15228662 | 3'-Hydroxy-4'-O-Methylglabridin | ABL1    |
| 15228662 | 3'-Hydroxy-4'-O-Methylglabridin | ADORA1  |
| 15228662 | 3'-Hydroxy-4'-O-Methylglabridin | ADORA2A |
| 15228662 | 3'-Hydroxy-4'-O-Methylglabridin | ADORA2B |
| 15228662 | 3'-Hydroxy-4'-O-Methylglabridin | ADORA3  |
| 15228662 | 3'-Hydroxy-4'-O-Methylglabridin | AHCY    |
| 15228662 | 3'-Hydroxy-4'-O-Methylglabridin | ALPG    |
| 15228662 | 3'-Hydroxy-4'-O-Methylglabridin | ALPL    |
| 15228662 | 3'-Hydroxy-4'-O-Methylglabridin | AR      |
| 15228662 | 3'-Hydroxy-4'-O-Methylglabridin | ATM     |
| 15228662 | 3'-Hydroxy-4'-O-Methylglabridin | ATR     |
| 15228662 | 3'-Hydroxy-4'-O-Methylglabridin | BMP1    |
| 15228662 | 3'-Hydroxy-4'-O-Methylglabridin | BRAF    |
| 15228662 | 3'-Hydroxy-4'-O-Methylglabridin | CCND1   |
| 15228662 | 3'-Hydroxy-4'-O-Methylglabridin | CCNE1   |
| 15228662 | 3'-Hydroxy-4'-O-Methylglabridin | CCNE2   |
| 15228662 | 3'-Hydroxy-4'-O-Methylglabridin | CDC25A  |
| 15228662 | 3'-Hydroxy-4'-O-Methylglabridin | CDC25B  |
| 15228662 | 3'-Hydroxy-4'-O-Methylglabridin | CDC25C  |
| 15228662 | 3'-Hydroxy-4'-O-Methylglabridin | CDK1    |

|          |                                 |       |
|----------|---------------------------------|-------|
| 15228662 | 3'-Hydroxy-4'-O-Methylglabridin | CDK2  |
| 15228662 | 3'-Hydroxy-4'-O-Methylglabridin | CDK2  |
| 15228662 | 3'-Hydroxy-4'-O-Methylglabridin | CDK4  |
| 15228662 | 3'-Hydroxy-4'-O-Methylglabridin | CDK4  |
| 15228662 | 3'-Hydroxy-4'-O-Methylglabridin | CHEK1 |
| 15228662 | 3'-Hydroxy-4'-O-Methylglabridin | CRHR1 |
| 15228662 | 3'-Hydroxy-4'-O-Methylglabridin | DNM1  |
| 15228662 | 3'-Hydroxy-4'-O-Methylglabridin | DRD1  |
| 15228662 | 3'-Hydroxy-4'-O-Methylglabridin | DRD3  |
| 15228662 | 3'-Hydroxy-4'-O-Methylglabridin | ELANE |
| 15228662 | 3'-Hydroxy-4'-O-Methylglabridin | ENPP1 |
| 15228662 | 3'-Hydroxy-4'-O-Methylglabridin | EPHB2 |
| 15228662 | 3'-Hydroxy-4'-O-Methylglabridin | EPHB4 |
| 15228662 | 3'-Hydroxy-4'-O-Methylglabridin | ERN1  |
| 15228662 | 3'-Hydroxy-4'-O-Methylglabridin | ESR1  |
| 15228662 | 3'-Hydroxy-4'-O-Methylglabridin | ESR2  |
| 15228662 | 3'-Hydroxy-4'-O-Methylglabridin | ESRRG |
| 15228662 | 3'-Hydroxy-4'-O-Methylglabridin | F3    |
| 15228662 | 3'-Hydroxy-4'-O-Methylglabridin | FGFR1 |
| 15228662 | 3'-Hydroxy-4'-O-Methylglabridin | FLT3  |
| 15228662 | 3'-Hydroxy-4'-O-Methylglabridin | GCGR  |
| 15228662 | 3'-Hydroxy-4'-O-Methylglabridin | GCK   |

|          |                                 |          |
|----------|---------------------------------|----------|
| 15228662 | 3'-Hydroxy-4'-O-Methylglabridin | GRIA1    |
| 15228662 | 3'-Hydroxy-4'-O-Methylglabridin | GRM1     |
| 15228662 | 3'-Hydroxy-4'-O-Methylglabridin | GSK3A    |
| 15228662 | 3'-Hydroxy-4'-O-Methylglabridin | HCK      |
| 15228662 | 3'-Hydroxy-4'-O-Methylglabridin | HDAC1    |
| 15228662 | 3'-Hydroxy-4'-O-Methylglabridin | HDAC8    |
| 15228662 | 3'-Hydroxy-4'-O-Methylglabridin | HPGDS    |
| 15228662 | 3'-Hydroxy-4'-O-Methylglabridin | HSD17B1  |
| 15228662 | 3'-Hydroxy-4'-O-Methylglabridin | HSD17B2  |
| 15228662 | 3'-Hydroxy-4'-O-Methylglabridin | HSD17B3  |
| 15228662 | 3'-Hydroxy-4'-O-Methylglabridin | HSP90AB1 |
| 15228662 | 3'-Hydroxy-4'-O-Methylglabridin | HTR1A    |
| 15228662 | 3'-Hydroxy-4'-O-Methylglabridin | HTR2C    |
| 15228662 | 3'-Hydroxy-4'-O-Methylglabridin | KDM1A    |
| 15228662 | 3'-Hydroxy-4'-O-Methylglabridin | KDR      |
| 15228662 | 3'-Hydroxy-4'-O-Methylglabridin | KIT      |
| 15228662 | 3'-Hydroxy-4'-O-Methylglabridin | LCK      |
| 15228662 | 3'-Hydroxy-4'-O-Methylglabridin | LNPEP    |
| 15228662 | 3'-Hydroxy-4'-O-Methylglabridin | MAOB     |
| 15228662 | 3'-Hydroxy-4'-O-Methylglabridin | MAPT     |
| 15228662 | 3'-Hydroxy-4'-O-Methylglabridin | MARK1    |
| 15228662 | 3'-Hydroxy-4'-O-Methylglabridin | MELK     |

|          |                                 |        |
|----------|---------------------------------|--------|
| 15228662 | 3'-Hydroxy-4'-O-Methylglabridin | MET    |
| 15228662 | 3'-Hydroxy-4'-O-Methylglabridin | MTOR   |
| 15228662 | 3'-Hydroxy-4'-O-Methylglabridin | MYLK   |
| 15228662 | 3'-Hydroxy-4'-O-Methylglabridin | ODC1   |
| 15228662 | 3'-Hydroxy-4'-O-Methylglabridin | PARP1  |
| 15228662 | 3'-Hydroxy-4'-O-Methylglabridin | PDE10A |
| 15228662 | 3'-Hydroxy-4'-O-Methylglabridin | PDE3A  |
| 15228662 | 3'-Hydroxy-4'-O-Methylglabridin | PDE5A  |
| 15228662 | 3'-Hydroxy-4'-O-Methylglabridin | PDE7A  |
| 15228662 | 3'-Hydroxy-4'-O-Methylglabridin | PDK1   |
| 15228662 | 3'-Hydroxy-4'-O-Methylglabridin | PI4KB  |
| 15228662 | 3'-Hydroxy-4'-O-Methylglabridin | PIK3CB |
| 15228662 | 3'-Hydroxy-4'-O-Methylglabridin | PIK3CD |
| 15228662 | 3'-Hydroxy-4'-O-Methylglabridin | PIK3CG |
| 15228662 | 3'-Hydroxy-4'-O-Methylglabridin | PIK3R1 |
| 15228662 | 3'-Hydroxy-4'-O-Methylglabridin | PIM1   |
| 15228662 | 3'-Hydroxy-4'-O-Methylglabridin | PIM2   |
| 15228662 | 3'-Hydroxy-4'-O-Methylglabridin | PIM3   |
| 15228662 | 3'-Hydroxy-4'-O-Methylglabridin | PLAA   |
| 15228662 | 3'-Hydroxy-4'-O-Methylglabridin | PLK1   |
| 15228662 | 3'-Hydroxy-4'-O-Methylglabridin | PRKDC  |
| 15228662 | 3'-Hydroxy-4'-O-Methylglabridin | PTK6   |

|          |                                 |         |
|----------|---------------------------------|---------|
| 15228662 | 3'-Hydroxy-4'-O-Methylglabridin | PTPN1   |
| 15228662 | 3'-Hydroxy-4'-O-Methylglabridin | RAF1    |
| 15228662 | 3'-Hydroxy-4'-O-Methylglabridin | RET     |
| 15228662 | 3'-Hydroxy-4'-O-Methylglabridin | ROCK1   |
| 15228662 | 3'-Hydroxy-4'-O-Methylglabridin | RORC    |
| 15228662 | 3'-Hydroxy-4'-O-Methylglabridin | RPS6KA3 |
| 15228662 | 3'-Hydroxy-4'-O-Methylglabridin | S1PR1   |
| 15228662 | 3'-Hydroxy-4'-O-Methylglabridin | S1PR3   |
| 15228662 | 3'-Hydroxy-4'-O-Methylglabridin | SHBG    |
| 15228662 | 3'-Hydroxy-4'-O-Methylglabridin | SNCA    |
| 15228662 | 3'-Hydroxy-4'-O-Methylglabridin | SRC     |
| 15228662 | 3'-Hydroxy-4'-O-Methylglabridin | TBXA2R  |
| 15228662 | 3'-Hydroxy-4'-O-Methylglabridin | TGFBR1  |
| 15228662 | 3'-Hydroxy-4'-O-Methylglabridin | TRPM8   |
| 15228662 | 3'-Hydroxy-4'-O-Methylglabridin | VCP     |
| 15228662 | 3'-Hydroxy-4'-O-Methylglabridin | WEE1    |
| 15228662 | 3'-Hydroxy-4'-O-Methylglabridin | XDH     |
| 5318998  | licochalcone a                  | ABCB1   |
| 5318998  | licochalcone a                  | ABCG2   |
| 5318998  | licochalcone a                  | ABL1    |
| 5318998  | licochalcone a                  | ACHE    |
| 5318998  | licochalcone a                  | ADAM10  |
| 5318998  | licochalcone a                  | ADAM17  |
| 5318998  | licochalcone a                  | ADORA2B |
| 5318998  | licochalcone a                  | ADRA1B  |
| 5318998  | licochalcone a                  | AKR1B1  |
| 5318998  | licochalcone a                  | ALOX5   |

|         |                |         |
|---------|----------------|---------|
| 5318998 | licochalcone a | APH1A   |
| 5318998 | licochalcone a | APH1B   |
| 5318998 | licochalcone a | APP     |
| 5318998 | licochalcone a | BACE1   |
| 5318998 | licochalcone a | BCHE    |
| 5318998 | licochalcone a | BMP1    |
| 5318998 | licochalcone a | BRAF    |
| 5318998 | licochalcone a | CAPN1   |
| 5318998 | licochalcone a | CDC25A  |
| 5318998 | licochalcone a | CDC25B  |
| 5318998 | licochalcone a | CHRNA4  |
| 5318998 | licochalcone a | CHRNA7  |
| 5318998 | licochalcone a | CHRNA7  |
| 5318998 | licochalcone a | CTSD    |
| 5318998 | licochalcone a | CYP11B1 |
| 5318998 | licochalcone a | CYP11B2 |
| 5318998 | licochalcone a | CYP19A1 |
| 5318998 | licochalcone a | EGFR    |
| 5318998 | licochalcone a | ERN1    |
| 5318998 | licochalcone a | ESRRB   |
| 5318998 | licochalcone a | F3      |
| 5318998 | licochalcone a | FASN    |
| 5318998 | licochalcone a | FLT3    |
| 5318998 | licochalcone a | GNRHR   |
| 5318998 | licochalcone a | HCRTR2  |
| 5318998 | licochalcone a | HDAC1   |
| 5318998 | licochalcone a | HDAC10  |
| 5318998 | licochalcone a | HDAC11  |
| 5318998 | licochalcone a | HDAC3   |
| 5318998 | licochalcone a | HDAC3   |
| 5318998 | licochalcone a | HDAC4   |
| 5318998 | licochalcone a | HDAC5   |
| 5318998 | licochalcone a | HDAC6   |
| 5318998 | licochalcone a | HDAC7   |
| 5318998 | licochalcone a | HDAC8   |
| 5318998 | licochalcone a | HDAC9   |
| 5318998 | licochalcone a | HPGDS   |
| 5318998 | licochalcone a | HTR1A   |
| 5318998 | licochalcone a | ICAM1   |
| 5318998 | licochalcone a | IMPDH1  |
| 5318998 | licochalcone a | ITGAL   |
| 5318998 | licochalcone a | ITGB2   |
| 5318998 | licochalcone a | ITK     |
| 5318998 | licochalcone a | JAK2    |



|         |              |          |
|---------|--------------|----------|
| 5318998 | licoalcone a | KCNA3    |
| 5318998 | licoalcone a | MAOA     |
| 5318998 | licoalcone a | MAOB     |
| 5318998 | licoalcone a | MAPK1    |
| 5318998 | licoalcone a | MAPK10   |
| 5318998 | licoalcone a | MAPK14   |
| 5318998 | licoalcone a | MAPKAPK2 |
| 5318998 | licoalcone a | MDM2     |
| 5318998 | licoalcone a | MDM4     |
| 5318998 | licoalcone a | MIF      |
| 5318998 | licoalcone a | MMP1     |
| 5318998 | licoalcone a | MMP13    |
| 5318998 | licoalcone a | MMP8     |
| 5318998 | licoalcone a | MMP9     |
| 5318998 | licoalcone a | NAAA     |
| 5318998 | licoalcone a | NCOR2    |
| 5318998 | licoalcone a | NCSTN    |
| 5318998 | licoalcone a | NOS2     |
| 5318998 | licoalcone a | NPY5R    |
| 5318998 | licoalcone a | NR1H4    |
| 5318998 | licoalcone a | ODC1     |
| 5318998 | licoalcone a | P2RX3    |
| 5318998 | licoalcone a | PDE10A   |
| 5318998 | licoalcone a | PDE4B    |
| 5318998 | licoalcone a | PDGFRB   |
| 5318998 | licoalcone a | PDK1     |
| 5318998 | licoalcone a | PDPK1    |
| 5318998 | licoalcone a | PIM1     |
| 5318998 | licoalcone a | PIM2     |
| 5318998 | licoalcone a | PIM3     |
| 5318998 | licoalcone a | PLA2G1B  |
| 5318998 | licoalcone a | PLA2G2A  |
| 5318998 | licoalcone a | PRKCB    |
| 5318998 | licoalcone a | PSEN1    |
| 5318998 | licoalcone a | PSEN2    |
| 5318998 | licoalcone a | PSENEN   |
| 5318998 | licoalcone a | PTGS1    |
| 5318998 | licoalcone a | PTGS2    |
| 5318998 | licoalcone a | PTPN1    |
| 5318998 | licoalcone a | PTPN6    |
| 5318998 | licoalcone a | RAF1     |
| 5318998 | licoalcone a | RET      |
| 5318998 | licoalcone a | ROCK1    |
| 5318998 | licoalcone a | ROCK2    |

|          |                     |         |
|----------|---------------------|---------|
| 5318998  | licochalcone a      | RPS6KB1 |
| 5318998  | licochalcone a      | S1PR1   |
| 5318998  | licochalcone a      | S1PR3   |
| 5318998  | licochalcone a      | SLC29A1 |
| 5318998  | licochalcone a      | SLC5A1  |
| 5318998  | licochalcone a      | SLC5A2  |
| 5318998  | licochalcone a      | TACR3   |
| 5318998  | licochalcone a      | THRA    |
| 5318998  | licochalcone a      | THRB    |
| 5318998  | licochalcone a      | TRPM8   |
| 5318998  | licochalcone a      | TYR     |
| 5318998  | licochalcone a      | VCP     |
| 15228663 | 3'-Methoxyglabridin | ABL1    |
| 15228663 | 3'-Methoxyglabridin | ADORA1  |
| 15228663 | 3'-Methoxyglabridin | ADORA2A |
| 15228663 | 3'-Methoxyglabridin | ADORA2B |
| 15228663 | 3'-Methoxyglabridin | ADORA3  |
| 15228663 | 3'-Methoxyglabridin | AHCY    |
| 15228663 | 3'-Methoxyglabridin | ALPG    |
| 15228663 | 3'-Methoxyglabridin | ALPL    |
| 15228663 | 3'-Methoxyglabridin | AR      |
| 15228663 | 3'-Methoxyglabridin | AURKA   |
| 15228663 | 3'-Methoxyglabridin | AURKB   |
| 15228663 | 3'-Methoxyglabridin | BCL2    |
| 15228663 | 3'-Methoxyglabridin | BMP1    |
| 15228663 | 3'-Methoxyglabridin | BRAF    |
| 15228663 | 3'-Methoxyglabridin | CBFB    |
| 15228663 | 3'-Methoxyglabridin | CCNB1   |
| 15228663 | 3'-Methoxyglabridin | CCNB2   |
| 15228663 | 3'-Methoxyglabridin | CCNB3   |
| 15228663 | 3'-Methoxyglabridin | CCND1   |
| 15228663 | 3'-Methoxyglabridin | CCND1   |
| 15228663 | 3'-Methoxyglabridin | CCND2   |
| 15228663 | 3'-Methoxyglabridin | CCND3   |
| 15228663 | 3'-Methoxyglabridin | CCNE1   |
| 15228663 | 3'-Methoxyglabridin | CCNE2   |
| 15228663 | 3'-Methoxyglabridin | CDC25A  |
| 15228663 | 3'-Methoxyglabridin | CDC25B  |
| 15228663 | 3'-Methoxyglabridin | CDC25C  |
| 15228663 | 3'-Methoxyglabridin | CDK1    |
| 15228663 | 3'-Methoxyglabridin | CDK1    |
| 15228663 | 3'-Methoxyglabridin | CDK2    |
| 15228663 | 3'-Methoxyglabridin | CDK2    |
| 15228663 | 3'-Methoxyglabridin | CDK4    |

|          |                     |         |
|----------|---------------------|---------|
| 15228663 | 3'-Methoxyglabridin | CDK4    |
| 15228663 | 3'-Methoxyglabridin | CDK4    |
| 15228663 | 3'-Methoxyglabridin | CDK5    |
| 15228663 | 3'-Methoxyglabridin | CDK5R1  |
| 15228663 | 3'-Methoxyglabridin | CHEK1   |
| 15228663 | 3'-Methoxyglabridin | DRD1    |
| 15228663 | 3'-Methoxyglabridin | DRD3    |
| 15228663 | 3'-Methoxyglabridin | ELANE   |
| 15228663 | 3'-Methoxyglabridin | ENPP1   |
| 15228663 | 3'-Methoxyglabridin | EP300   |
| 15228663 | 3'-Methoxyglabridin | EPHB2   |
| 15228663 | 3'-Methoxyglabridin | ERN1    |
| 15228663 | 3'-Methoxyglabridin | ESR2    |
| 15228663 | 3'-Methoxyglabridin | ESRRG   |
| 15228663 | 3'-Methoxyglabridin | EZR     |
| 15228663 | 3'-Methoxyglabridin | FGFR1   |
| 15228663 | 3'-Methoxyglabridin | FGFR2   |
| 15228663 | 3'-Methoxyglabridin | FLT3    |
| 15228663 | 3'-Methoxyglabridin | GRIA1   |
| 15228663 | 3'-Methoxyglabridin | GRM1    |
| 15228663 | 3'-Methoxyglabridin | HDAC1   |
| 15228663 | 3'-Methoxyglabridin | HDAC8   |
| 15228663 | 3'-Methoxyglabridin | HPGDS   |
| 15228663 | 3'-Methoxyglabridin | HSD17B1 |
| 15228663 | 3'-Methoxyglabridin | HSD17B2 |
| 15228663 | 3'-Methoxyglabridin | HSD17B3 |
| 15228663 | 3'-Methoxyglabridin | HTR1A   |
| 15228663 | 3'-Methoxyglabridin | KDR     |
| 15228663 | 3'-Methoxyglabridin | KIT     |
| 15228663 | 3'-Methoxyglabridin | LCK     |
| 15228663 | 3'-Methoxyglabridin | LNPEP   |
| 15228663 | 3'-Methoxyglabridin | LTA4H   |
| 15228663 | 3'-Methoxyglabridin | MAOB    |
| 15228663 | 3'-Methoxyglabridin | MAPK14  |
| 15228663 | 3'-Methoxyglabridin | MAPT    |
| 15228663 | 3'-Methoxyglabridin | MCL1    |
| 15228663 | 3'-Methoxyglabridin | MELK    |
| 15228663 | 3'-Methoxyglabridin | MET     |
| 15228663 | 3'-Methoxyglabridin | MKNK1   |
| 15228663 | 3'-Methoxyglabridin | MMP8    |
| 15228663 | 3'-Methoxyglabridin | MTOR    |
| 15228663 | 3'-Methoxyglabridin | NOX1    |
| 15228663 | 3'-Methoxyglabridin | NOX4    |
| 15228663 | 3'-Methoxyglabridin | ODC1    |

|          |                                                                                |         |
|----------|--------------------------------------------------------------------------------|---------|
| 15228663 | 3'-Methoxyglabridin                                                            | PDE10A  |
| 15228663 | 3'-Methoxyglabridin                                                            | PDE5A   |
| 15228663 | 3'-Methoxyglabridin                                                            | PDE7A   |
| 15228663 | 3'-Methoxyglabridin                                                            | PDGFRA  |
| 15228663 | 3'-Methoxyglabridin                                                            | PDGFRB  |
| 15228663 | 3'-Methoxyglabridin                                                            | PDK1    |
| 15228663 | 3'-Methoxyglabridin                                                            | PIK3CD  |
| 15228663 | 3'-Methoxyglabridin                                                            | PIK3CG  |
| 15228663 | 3'-Methoxyglabridin                                                            | PIK3R1  |
| 15228663 | 3'-Methoxyglabridin                                                            | PIM1    |
| 15228663 | 3'-Methoxyglabridin                                                            | PIM2    |
| 15228663 | 3'-Methoxyglabridin                                                            | PIM3    |
| 15228663 | 3'-Methoxyglabridin                                                            | PLAA    |
| 15228663 | 3'-Methoxyglabridin                                                            | PLK1    |
| 15228663 | 3'-Methoxyglabridin                                                            | PRF1    |
| 15228663 | 3'-Methoxyglabridin                                                            | PRKACA  |
| 15228663 | 3'-Methoxyglabridin                                                            | PRKCA   |
| 15228663 | 3'-Methoxyglabridin                                                            | PTK2    |
| 15228663 | 3'-Methoxyglabridin                                                            | PTK6    |
| 15228663 | 3'-Methoxyglabridin                                                            | PTPN1   |
| 15228663 | 3'-Methoxyglabridin                                                            | RAF1    |
| 15228663 | 3'-Methoxyglabridin                                                            | RET     |
| 15228663 | 3'-Methoxyglabridin                                                            | ROCK1   |
| 15228663 | 3'-Methoxyglabridin                                                            | S1PR1   |
| 15228663 | 3'-Methoxyglabridin                                                            | S1PR3   |
| 15228663 | 3'-Methoxyglabridin                                                            | SCD     |
| 15228663 | 3'-Methoxyglabridin                                                            | SHBG    |
| 15228663 | 3'-Methoxyglabridin                                                            | SNCA    |
| 15228663 | 3'-Methoxyglabridin                                                            | SRC     |
| 15228663 | 3'-Methoxyglabridin                                                            | SYK     |
| 15228663 | 3'-Methoxyglabridin                                                            | TBXA2R  |
| 15228663 | 3'-Methoxyglabridin                                                            | TRPM8   |
| 15228663 | 3'-Methoxyglabridin                                                            | VCP     |
| 15228663 | 3'-Methoxyglabridin                                                            | WEE1    |
| 15228663 | 3'-Methoxyglabridin                                                            | XDH     |
| 9927807  | 2-[(3R)-8,8-dimethyl-3,4-dihydro-2H-pyrano[6,5-f]chromen-3-yl]-5-methoxyphenol | ABL1    |
| 9927807  | 2-[(3R)-8,8-dimethyl-3,4-dihydro-2H-pyrano[6,5-f]chromen-3-yl]-5-methoxyphenol | ADAMTS5 |

|         |                                                                                |         |
|---------|--------------------------------------------------------------------------------|---------|
| 9927807 | 2-[(3R)-8,8-dimethyl-3,4-dihydro-2H-pyrano[6,5-f]chromen-3-yl]-5-methoxyphenol | ADORA1  |
| 9927807 | 2-[(3R)-8,8-dimethyl-3,4-dihydro-2H-pyrano[6,5-f]chromen-3-yl]-5-methoxyphenol | ADORA2A |
| 9927807 | 2-[(3R)-8,8-dimethyl-3,4-dihydro-2H-pyrano[6,5-f]chromen-3-yl]-5-methoxyphenol | ADORA2B |
| 9927807 | 2-[(3R)-8,8-dimethyl-3,4-dihydro-2H-pyrano[6,5-f]chromen-3-yl]-5-methoxyphenol | ADORA3  |
| 9927807 | 2-[(3R)-8,8-dimethyl-3,4-dihydro-2H-pyrano[6,5-f]chromen-3-yl]-5-methoxyphenol | ALPL    |
| 9927807 | 2-[(3R)-8,8-dimethyl-3,4-dihydro-2H-pyrano[6,5-f]chromen-3-yl]-5-methoxyphenol | AR      |
| 9927807 | 2-[(3R)-8,8-dimethyl-3,4-dihydro-2H-pyrano[6,5-f]chromen-3-yl]-5-methoxyphenol | ATM     |
| 9927807 | 2-[(3R)-8,8-dimethyl-3,4-dihydro-2H-pyrano[6,5-f]chromen-3-yl]-5-methoxyphenol | ATP4A   |
| 9927807 | 2-[(3R)-8,8-dimethyl-3,4-dihydro-2H-pyrano[6,5-f]chromen-3-yl]-5-methoxyphenol | ATP4B   |
| 9927807 | 2-[(3R)-8,8-dimethyl-3,4-dihydro-2H-pyrano[6,5-f]chromen-3-yl]-5-methoxyphenol | ATR     |
| 9927807 | 2-[(3R)-8,8-dimethyl-3,4-dihydro-2H-pyrano[6,5-f]chromen-3-yl]-5-methoxyphenol | AVPR1A  |

|         |                                                                                |       |
|---------|--------------------------------------------------------------------------------|-------|
| 9927807 | 2-[(3R)-8,8-dimethyl-3,4-dihydro-2H-pyrano[6,5-f]chromen-3-yl]-5-methoxyphenol | BRAF  |
| 9927807 | 2-[(3R)-8,8-dimethyl-3,4-dihydro-2H-pyrano[6,5-f]chromen-3-yl]-5-methoxyphenol | CCNB1 |
| 9927807 | 2-[(3R)-8,8-dimethyl-3,4-dihydro-2H-pyrano[6,5-f]chromen-3-yl]-5-methoxyphenol | CCNB2 |
| 9927807 | 2-[(3R)-8,8-dimethyl-3,4-dihydro-2H-pyrano[6,5-f]chromen-3-yl]-5-methoxyphenol | CCNB3 |
| 9927807 | 2-[(3R)-8,8-dimethyl-3,4-dihydro-2H-pyrano[6,5-f]chromen-3-yl]-5-methoxyphenol | CCND1 |
| 9927807 | 2-[(3R)-8,8-dimethyl-3,4-dihydro-2H-pyrano[6,5-f]chromen-3-yl]-5-methoxyphenol | CCNE1 |
| 9927807 | 2-[(3R)-8,8-dimethyl-3,4-dihydro-2H-pyrano[6,5-f]chromen-3-yl]-5-methoxyphenol | CCNE2 |
| 9927807 | 2-[(3R)-8,8-dimethyl-3,4-dihydro-2H-pyrano[6,5-f]chromen-3-yl]-5-methoxyphenol | CDK1  |
| 9927807 | 2-[(3R)-8,8-dimethyl-3,4-dihydro-2H-pyrano[6,5-f]chromen-3-yl]-5-methoxyphenol | CDK2  |
| 9927807 | 2-[(3R)-8,8-dimethyl-3,4-dihydro-2H-pyrano[6,5-f]chromen-3-yl]-5-methoxyphenol | CDK4  |
| 9927807 | 2-[(3R)-8,8-dimethyl-3,4-dihydro-2H-pyrano[6,5-f]chromen-3-yl]-5-methoxyphenol | CDK5  |

|         |                                                                                |        |
|---------|--------------------------------------------------------------------------------|--------|
| 9927807 | 2-[(3R)-8,8-dimethyl-3,4-dihydro-2H-pyrano[6,5-f]chromen-3-yl]-5-methoxyphenol | CDK5R1 |
| 9927807 | 2-[(3R)-8,8-dimethyl-3,4-dihydro-2H-pyrano[6,5-f]chromen-3-yl]-5-methoxyphenol | CHEK1  |
| 9927807 | 2-[(3R)-8,8-dimethyl-3,4-dihydro-2H-pyrano[6,5-f]chromen-3-yl]-5-methoxyphenol | CHRNA7 |
| 9927807 | 2-[(3R)-8,8-dimethyl-3,4-dihydro-2H-pyrano[6,5-f]chromen-3-yl]-5-methoxyphenol | CRHR1  |
| 9927807 | 2-[(3R)-8,8-dimethyl-3,4-dihydro-2H-pyrano[6,5-f]chromen-3-yl]-5-methoxyphenol | CTSD   |
| 9927807 | 2-[(3R)-8,8-dimethyl-3,4-dihydro-2H-pyrano[6,5-f]chromen-3-yl]-5-methoxyphenol | DAGLA  |
| 9927807 | 2-[(3R)-8,8-dimethyl-3,4-dihydro-2H-pyrano[6,5-f]chromen-3-yl]-5-methoxyphenol | DRD1   |
| 9927807 | 2-[(3R)-8,8-dimethyl-3,4-dihydro-2H-pyrano[6,5-f]chromen-3-yl]-5-methoxyphenol | DRD2   |
| 9927807 | 2-[(3R)-8,8-dimethyl-3,4-dihydro-2H-pyrano[6,5-f]chromen-3-yl]-5-methoxyphenol | DRD3   |
| 9927807 | 2-[(3R)-8,8-dimethyl-3,4-dihydro-2H-pyrano[6,5-f]chromen-3-yl]-5-methoxyphenol | EGFR   |
| 9927807 | 2-[(3R)-8,8-dimethyl-3,4-dihydro-2H-pyrano[6,5-f]chromen-3-yl]-5-methoxyphenol | ELANE  |

|         |                                                                                |       |
|---------|--------------------------------------------------------------------------------|-------|
| 9927807 | 2-[(3R)-8,8-dimethyl-3,4-dihydro-2H-pyrano[6,5-f]chromen-3-yl]-5-methoxyphenol | EP300 |
| 9927807 | 2-[(3R)-8,8-dimethyl-3,4-dihydro-2H-pyrano[6,5-f]chromen-3-yl]-5-methoxyphenol | EPHB2 |
| 9927807 | 2-[(3R)-8,8-dimethyl-3,4-dihydro-2H-pyrano[6,5-f]chromen-3-yl]-5-methoxyphenol | ERBB2 |
| 9927807 | 2-[(3R)-8,8-dimethyl-3,4-dihydro-2H-pyrano[6,5-f]chromen-3-yl]-5-methoxyphenol | ERN1  |
| 9927807 | 2-[(3R)-8,8-dimethyl-3,4-dihydro-2H-pyrano[6,5-f]chromen-3-yl]-5-methoxyphenol | ESR1  |
| 9927807 | 2-[(3R)-8,8-dimethyl-3,4-dihydro-2H-pyrano[6,5-f]chromen-3-yl]-5-methoxyphenol | ESR2  |
| 9927807 | 2-[(3R)-8,8-dimethyl-3,4-dihydro-2H-pyrano[6,5-f]chromen-3-yl]-5-methoxyphenol | ESRRG |
| 9927807 | 2-[(3R)-8,8-dimethyl-3,4-dihydro-2H-pyrano[6,5-f]chromen-3-yl]-5-methoxyphenol | F3    |
| 9927807 | 2-[(3R)-8,8-dimethyl-3,4-dihydro-2H-pyrano[6,5-f]chromen-3-yl]-5-methoxyphenol | FASN  |
| 9927807 | 2-[(3R)-8,8-dimethyl-3,4-dihydro-2H-pyrano[6,5-f]chromen-3-yl]-5-methoxyphenol | FGFR1 |
| 9927807 | 2-[(3R)-8,8-dimethyl-3,4-dihydro-2H-pyrano[6,5-f]chromen-3-yl]-5-methoxyphenol | FLT1  |



|         |                                                                                |         |
|---------|--------------------------------------------------------------------------------|---------|
| 9927807 | 2-[(3R)-8,8-dimethyl-3,4-dihydro-2H-pyrano[6,5-f]chromen-3-yl]-5-methoxyphenol | FLT3    |
| 9927807 | 2-[(3R)-8,8-dimethyl-3,4-dihydro-2H-pyrano[6,5-f]chromen-3-yl]-5-methoxyphenol | FNTA    |
| 9927807 | 2-[(3R)-8,8-dimethyl-3,4-dihydro-2H-pyrano[6,5-f]chromen-3-yl]-5-methoxyphenol | FNTB    |
| 9927807 | 2-[(3R)-8,8-dimethyl-3,4-dihydro-2H-pyrano[6,5-f]chromen-3-yl]-5-methoxyphenol | GCGR    |
| 9927807 | 2-[(3R)-8,8-dimethyl-3,4-dihydro-2H-pyrano[6,5-f]chromen-3-yl]-5-methoxyphenol | GCK     |
| 9927807 | 2-[(3R)-8,8-dimethyl-3,4-dihydro-2H-pyrano[6,5-f]chromen-3-yl]-5-methoxyphenol | GRIA1   |
| 9927807 | 2-[(3R)-8,8-dimethyl-3,4-dihydro-2H-pyrano[6,5-f]chromen-3-yl]-5-methoxyphenol | GRM4    |
| 9927807 | 2-[(3R)-8,8-dimethyl-3,4-dihydro-2H-pyrano[6,5-f]chromen-3-yl]-5-methoxyphenol | GSK3A   |
| 9927807 | 2-[(3R)-8,8-dimethyl-3,4-dihydro-2H-pyrano[6,5-f]chromen-3-yl]-5-methoxyphenol | HPGDS   |
| 9927807 | 2-[(3R)-8,8-dimethyl-3,4-dihydro-2H-pyrano[6,5-f]chromen-3-yl]-5-methoxyphenol | HSD17B1 |
| 9927807 | 2-[(3R)-8,8-dimethyl-3,4-dihydro-2H-pyrano[6,5-f]chromen-3-yl]-5-methoxyphenol | HSD17B2 |

|         |                                                                                |          |
|---------|--------------------------------------------------------------------------------|----------|
| 9927807 | 2-[(3R)-8,8-dimethyl-3,4-dihydro-2H-pyrano[6,5-f]chromen-3-yl]-5-methoxyphenol | HSD17B3  |
| 9927807 | 2-[(3R)-8,8-dimethyl-3,4-dihydro-2H-pyrano[6,5-f]chromen-3-yl]-5-methoxyphenol | HSP90AB1 |
| 9927807 | 2-[(3R)-8,8-dimethyl-3,4-dihydro-2H-pyrano[6,5-f]chromen-3-yl]-5-methoxyphenol | HTR1A    |
| 9927807 | 2-[(3R)-8,8-dimethyl-3,4-dihydro-2H-pyrano[6,5-f]chromen-3-yl]-5-methoxyphenol | KDM1A    |
| 9927807 | 2-[(3R)-8,8-dimethyl-3,4-dihydro-2H-pyrano[6,5-f]chromen-3-yl]-5-methoxyphenol | KDR      |
| 9927807 | 2-[(3R)-8,8-dimethyl-3,4-dihydro-2H-pyrano[6,5-f]chromen-3-yl]-5-methoxyphenol | KIF11    |
| 9927807 | 2-[(3R)-8,8-dimethyl-3,4-dihydro-2H-pyrano[6,5-f]chromen-3-yl]-5-methoxyphenol | LCK      |
| 9927807 | 2-[(3R)-8,8-dimethyl-3,4-dihydro-2H-pyrano[6,5-f]chromen-3-yl]-5-methoxyphenol | LNPEP    |
| 9927807 | 2-[(3R)-8,8-dimethyl-3,4-dihydro-2H-pyrano[6,5-f]chromen-3-yl]-5-methoxyphenol | LTA4H    |
| 9927807 | 2-[(3R)-8,8-dimethyl-3,4-dihydro-2H-pyrano[6,5-f]chromen-3-yl]-5-methoxyphenol | MAOB     |
| 9927807 | 2-[(3R)-8,8-dimethyl-3,4-dihydro-2H-pyrano[6,5-f]chromen-3-yl]-5-methoxyphenol | MAPK14   |

|         |                                                                                |       |
|---------|--------------------------------------------------------------------------------|-------|
| 9927807 | 2-[(3R)-8,8-dimethyl-3,4-dihydro-2H-pyrano[6,5-f]chromen-3-yl]-5-methoxyphenol | MAPT  |
| 9927807 | 2-[(3R)-8,8-dimethyl-3,4-dihydro-2H-pyrano[6,5-f]chromen-3-yl]-5-methoxyphenol | MARK1 |
| 9927807 | 2-[(3R)-8,8-dimethyl-3,4-dihydro-2H-pyrano[6,5-f]chromen-3-yl]-5-methoxyphenol | MET   |
| 9927807 | 2-[(3R)-8,8-dimethyl-3,4-dihydro-2H-pyrano[6,5-f]chromen-3-yl]-5-methoxyphenol | MMP1  |
| 9927807 | 2-[(3R)-8,8-dimethyl-3,4-dihydro-2H-pyrano[6,5-f]chromen-3-yl]-5-methoxyphenol | MTOR  |
| 9927807 | 2-[(3R)-8,8-dimethyl-3,4-dihydro-2H-pyrano[6,5-f]chromen-3-yl]-5-methoxyphenol | MYLK  |
| 9927807 | 2-[(3R)-8,8-dimethyl-3,4-dihydro-2H-pyrano[6,5-f]chromen-3-yl]-5-methoxyphenol | NEK1  |
| 9927807 | 2-[(3R)-8,8-dimethyl-3,4-dihydro-2H-pyrano[6,5-f]chromen-3-yl]-5-methoxyphenol | NOX1  |
| 9927807 | 2-[(3R)-8,8-dimethyl-3,4-dihydro-2H-pyrano[6,5-f]chromen-3-yl]-5-methoxyphenol | NOX4  |
| 9927807 | 2-[(3R)-8,8-dimethyl-3,4-dihydro-2H-pyrano[6,5-f]chromen-3-yl]-5-methoxyphenol | NR4A1 |
| 9927807 | 2-[(3R)-8,8-dimethyl-3,4-dihydro-2H-pyrano[6,5-f]chromen-3-yl]-5-methoxyphenol | ODC1  |

|         |                                                                                |        |
|---------|--------------------------------------------------------------------------------|--------|
| 9927807 | 2-[(3R)-8,8-dimethyl-3,4-dihydro-2H-pyrano[6,5-f]chromen-3-yl]-5-methoxyphenol | PARP1  |
| 9927807 | 2-[(3R)-8,8-dimethyl-3,4-dihydro-2H-pyrano[6,5-f]chromen-3-yl]-5-methoxyphenol | PDE3A  |
| 9927807 | 2-[(3R)-8,8-dimethyl-3,4-dihydro-2H-pyrano[6,5-f]chromen-3-yl]-5-methoxyphenol | PDE4A  |
| 9927807 | 2-[(3R)-8,8-dimethyl-3,4-dihydro-2H-pyrano[6,5-f]chromen-3-yl]-5-methoxyphenol | PDE4B  |
| 9927807 | 2-[(3R)-8,8-dimethyl-3,4-dihydro-2H-pyrano[6,5-f]chromen-3-yl]-5-methoxyphenol | PDE5A  |
| 9927807 | 2-[(3R)-8,8-dimethyl-3,4-dihydro-2H-pyrano[6,5-f]chromen-3-yl]-5-methoxyphenol | PDE7A  |
| 9927807 | 2-[(3R)-8,8-dimethyl-3,4-dihydro-2H-pyrano[6,5-f]chromen-3-yl]-5-methoxyphenol | PDK1   |
| 9927807 | 2-[(3R)-8,8-dimethyl-3,4-dihydro-2H-pyrano[6,5-f]chromen-3-yl]-5-methoxyphenol | PIK3CG |
| 9927807 | 2-[(3R)-8,8-dimethyl-3,4-dihydro-2H-pyrano[6,5-f]chromen-3-yl]-5-methoxyphenol | PIK3R1 |
| 9927807 | 2-[(3R)-8,8-dimethyl-3,4-dihydro-2H-pyrano[6,5-f]chromen-3-yl]-5-methoxyphenol | PIM1   |
| 9927807 | 2-[(3R)-8,8-dimethyl-3,4-dihydro-2H-pyrano[6,5-f]chromen-3-yl]-5-methoxyphenol | PIM2   |

|         |                                                                                |         |
|---------|--------------------------------------------------------------------------------|---------|
| 9927807 | 2-[(3R)-8,8-dimethyl-3,4-dihydro-2H-pyrano[6,5-f]chromen-3-yl]-5-methoxyphenol | PLK1    |
| 9927807 | 2-[(3R)-8,8-dimethyl-3,4-dihydro-2H-pyrano[6,5-f]chromen-3-yl]-5-methoxyphenol | PRKDC   |
| 9927807 | 2-[(3R)-8,8-dimethyl-3,4-dihydro-2H-pyrano[6,5-f]chromen-3-yl]-5-methoxyphenol | PTPN1   |
| 9927807 | 2-[(3R)-8,8-dimethyl-3,4-dihydro-2H-pyrano[6,5-f]chromen-3-yl]-5-methoxyphenol | RET     |
| 9927807 | 2-[(3R)-8,8-dimethyl-3,4-dihydro-2H-pyrano[6,5-f]chromen-3-yl]-5-methoxyphenol | RORC    |
| 9927807 | 2-[(3R)-8,8-dimethyl-3,4-dihydro-2H-pyrano[6,5-f]chromen-3-yl]-5-methoxyphenol | S1PR1   |
| 9927807 | 2-[(3R)-8,8-dimethyl-3,4-dihydro-2H-pyrano[6,5-f]chromen-3-yl]-5-methoxyphenol | S1PR3   |
| 9927807 | 2-[(3R)-8,8-dimethyl-3,4-dihydro-2H-pyrano[6,5-f]chromen-3-yl]-5-methoxyphenol | SIGMAR1 |
| 9927807 | 2-[(3R)-8,8-dimethyl-3,4-dihydro-2H-pyrano[6,5-f]chromen-3-yl]-5-methoxyphenol | SMARCA2 |
| 9927807 | 2-[(3R)-8,8-dimethyl-3,4-dihydro-2H-pyrano[6,5-f]chromen-3-yl]-5-methoxyphenol | SNCA    |
| 9927807 | 2-[(3R)-8,8-dimethyl-3,4-dihydro-2H-pyrano[6,5-f]chromen-3-yl]-5-methoxyphenol | SRC     |

|         |                                                                                |        |
|---------|--------------------------------------------------------------------------------|--------|
| 9927807 | 2-[(3R)-8,8-dimethyl-3,4-dihydro-2H-pyrano[6,5-f]chromen-3-yl]-5-methoxyphenol | SREBF2 |
| 9927807 | 2-[(3R)-8,8-dimethyl-3,4-dihydro-2H-pyrano[6,5-f]chromen-3-yl]-5-methoxyphenol | STAT6  |
| 9927807 | 2-[(3R)-8,8-dimethyl-3,4-dihydro-2H-pyrano[6,5-f]chromen-3-yl]-5-methoxyphenol | TBXA2R |
| 9927807 | 2-[(3R)-8,8-dimethyl-3,4-dihydro-2H-pyrano[6,5-f]chromen-3-yl]-5-methoxyphenol | TGFBR1 |
| 9927807 | 2-[(3R)-8,8-dimethyl-3,4-dihydro-2H-pyrano[6,5-f]chromen-3-yl]-5-methoxyphenol | THRA   |
| 9927807 | 2-[(3R)-8,8-dimethyl-3,4-dihydro-2H-pyrano[6,5-f]chromen-3-yl]-5-methoxyphenol | TRPM8  |
| 9927807 | 2-[(3R)-8,8-dimethyl-3,4-dihydro-2H-pyrano[6,5-f]chromen-3-yl]-5-methoxyphenol | TRPV1  |
| 9927807 | 2-[(3R)-8,8-dimethyl-3,4-dihydro-2H-pyrano[6,5-f]chromen-3-yl]-5-methoxyphenol | WEE1   |
| 5318437 | Inflacoumarin A                                                                | ABL1   |
| 5318437 | Inflacoumarin A                                                                | ACVR1  |
| 5318437 | Inflacoumarin A                                                                | ADAM17 |
| 5318437 | Inflacoumarin A                                                                | ADRA1A |
| 5318437 | Inflacoumarin A                                                                | ADRA2A |
| 5318437 | Inflacoumarin A                                                                | ADRA2B |
| 5318437 | Inflacoumarin A                                                                | ADRA2C |
| 5318437 | Inflacoumarin A                                                                | AGTR1  |
| 5318437 | Inflacoumarin A                                                                | AKR1B1 |
| 5318437 | Inflacoumarin A                                                                | AURKC  |
| 5318437 | Inflacoumarin A                                                                | BACE2  |
| 5318437 | Inflacoumarin A                                                                | CA1    |

|         |                 |          |
|---------|-----------------|----------|
| 5318437 | Inflacoumarin A | CA12     |
| 5318437 | Inflacoumarin A | CA7      |
| 5318437 | Inflacoumarin A | CA9      |
| 5318437 | Inflacoumarin A | CAPN1    |
| 5318437 | Inflacoumarin A | CCNE1    |
| 5318437 | Inflacoumarin A | CCNE1    |
| 5318437 | Inflacoumarin A | CCNE2    |
| 5318437 | Inflacoumarin A | CDK2     |
| 5318437 | Inflacoumarin A | CDK2     |
| 5318437 | Inflacoumarin A | CDK4     |
| 5318437 | Inflacoumarin A | CDK5     |
| 5318437 | Inflacoumarin A | CHEK1    |
| 5318437 | Inflacoumarin A | CHRNA4   |
| 5318437 | Inflacoumarin A | CHRNA2   |
| 5318437 | Inflacoumarin A | CLK1     |
| 5318437 | Inflacoumarin A | COMT     |
| 5318437 | Inflacoumarin A | CTSD     |
| 5318437 | Inflacoumarin A | CYP19A1  |
| 5318437 | Inflacoumarin A | DRD1     |
| 5318437 | Inflacoumarin A | DRD2     |
| 5318437 | Inflacoumarin A | DRD3     |
| 5318437 | Inflacoumarin A | DYRK1A   |
| 5318437 | Inflacoumarin A | DYRK1B   |
| 5318437 | Inflacoumarin A | ELANE    |
| 5318437 | Inflacoumarin A | ESR1     |
| 5318437 | Inflacoumarin A | ESR2     |
| 5318437 | Inflacoumarin A | GSK3A    |
| 5318437 | Inflacoumarin A | HSD17B3  |
| 5318437 | Inflacoumarin A | HSP90AA1 |
| 5318437 | Inflacoumarin A | HSP90AB1 |
| 5318437 | Inflacoumarin A | JAK2     |
| 5318437 | Inflacoumarin A | KDM1A    |
| 5318437 | Inflacoumarin A | KIF11    |
| 5318437 | Inflacoumarin A | LDLR     |
| 5318437 | Inflacoumarin A | LTB4R    |
| 5318437 | Inflacoumarin A | MAP2K2   |
| 5318437 | Inflacoumarin A | MAPK8    |
| 5318437 | Inflacoumarin A | MDM2     |
| 5318437 | Inflacoumarin A | MDM4     |
| 5318437 | Inflacoumarin A | MMP1     |
| 5318437 | Inflacoumarin A | MMP7     |
| 5318437 | Inflacoumarin A | MMP8     |
| 5318437 | Inflacoumarin A | NEK1     |
| 5318437 | Inflacoumarin A | PAK4     |

|           |                 |         |
|-----------|-----------------|---------|
| 5318437   | Inflacoumarin A | PDGFRA  |
| 5318437   | Inflacoumarin A | PDK1    |
| 5318437   | Inflacoumarin A | PIK3CD  |
| 5318437   | Inflacoumarin A | PITRM1  |
| 5318437   | Inflacoumarin A | PLA2G2A |
| 5318437   | Inflacoumarin A | PLA2G7  |
| 5318437   | Inflacoumarin A | PRKCZ   |
| 5318437   | Inflacoumarin A | PTK6    |
| 5318437   | Inflacoumarin A | RAF1    |
| 5318437   | Inflacoumarin A | RET     |
| 5318437   | Inflacoumarin A | ROS1    |
| 5318437   | Inflacoumarin A | SHBG    |
| 5318437   | Inflacoumarin A | SIGMAR1 |
| 5318437   | Inflacoumarin A | TYMS    |
| 101666840 | Kanzonol F      | ABL1    |
| 101666840 | Kanzonol F      | ADAMTS4 |
| 101666840 | Kanzonol F      | ADAMTS5 |
| 101666840 | Kanzonol F      | ADORA1  |
| 101666840 | Kanzonol F      | ADORA2A |
| 101666840 | Kanzonol F      | ADORA2B |
| 101666840 | Kanzonol F      | ADORA3  |
| 101666840 | Kanzonol F      | AURKA   |
| 101666840 | Kanzonol F      | BRAF    |
| 101666840 | Kanzonol F      | CCKAR   |
| 101666840 | Kanzonol F      | CCKBR   |
| 101666840 | Kanzonol F      | CCNA1   |
| 101666840 | Kanzonol F      | CCNA2   |
| 101666840 | Kanzonol F      | CCNA2   |
| 101666840 | Kanzonol F      | CDK2    |
| 101666840 | Kanzonol F      | CDK2    |
| 101666840 | Kanzonol F      | CDK5    |
| 101666840 | Kanzonol F      | CDK5R1  |
| 101666840 | Kanzonol F      | CHEK1   |
| 101666840 | Kanzonol F      | CPT1A   |
| 101666840 | Kanzonol F      | CSF1R   |
| 101666840 | Kanzonol F      | CTSB    |
| 101666840 | Kanzonol F      | CXCR2   |
| 101666840 | Kanzonol F      | DDX3X   |
| 101666840 | Kanzonol F      | EGFR    |
| 101666840 | Kanzonol F      | ELANE   |
| 101666840 | Kanzonol F      | ESR1    |
| 101666840 | Kanzonol F      | ESR2    |
| 101666840 | Kanzonol F      | F10     |
| 101666840 | Kanzonol F      | FLT3    |



|           |                                                    |          |
|-----------|----------------------------------------------------|----------|
| 101666840 | Kanzonol F                                         | FNTA     |
| 101666840 | Kanzonol F                                         | FNTB     |
| 101666840 | Kanzonol F                                         | GCK      |
| 101666840 | Kanzonol F                                         | GPR119   |
| 101666840 | Kanzonol F                                         | GPR55    |
| 101666840 | Kanzonol F                                         | GRK2     |
| 101666840 | Kanzonol F                                         | GRK3     |
| 101666840 | Kanzonol F                                         | GRK5     |
| 101666840 | Kanzonol F                                         | GRM2     |
| 101666840 | Kanzonol F                                         | GSK3B    |
| 101666840 | Kanzonol F                                         | HSP90AB1 |
| 101666840 | Kanzonol F                                         | ITK      |
| 101666840 | Kanzonol F                                         | KIF11    |
| 101666840 | Kanzonol F                                         | LDLR     |
| 101666840 | Kanzonol F                                         | MGAM     |
| 101666840 | Kanzonol F                                         | NOS1     |
| 101666840 | Kanzonol F                                         | NOS3     |
| 101666840 | Kanzonol F                                         | NR1H4    |
| 101666840 | Kanzonol F                                         | NR4A1    |
| 101666840 | Kanzonol F                                         | ODC1     |
| 101666840 | Kanzonol F                                         | PDE10A   |
| 101666840 | Kanzonol F                                         | PDE5A    |
| 101666840 | Kanzonol F                                         | PDGFRB   |
| 101666840 | Kanzonol F                                         | PDK1     |
| 101666840 | Kanzonol F                                         | PTPN1    |
| 101666840 | Kanzonol F                                         | QPCTL    |
| 101666840 | Kanzonol F                                         | RAF1     |
| 101666840 | Kanzonol F                                         | SIGMAR1  |
| 101666840 | Kanzonol F                                         | SLC2A1   |
| 101666840 | Kanzonol F                                         | SLC2A2   |
| 101666840 | Kanzonol F                                         | SLC2A3   |
| 101666840 | Kanzonol F                                         | SLC8A1   |
| 101666840 | Kanzonol F                                         | SYK      |
| 25015742  | 7,2',4'-trihydroxy - 5-methoxy-3<br>- arylcoumarin | ABCB1    |
| 25015742  | 7,2',4'-trihydroxy - 5-methoxy-3<br>- arylcoumarin | ABCG2    |
| 25015742  | 7,2',4'-trihydroxy - 5-methoxy-3<br>- arylcoumarin | ACHE     |
| 25015742  | 7,2',4'-trihydroxy - 5-methoxy-3<br>- arylcoumarin | ADAM17   |
| 25015742  | 7,2',4'-trihydroxy - 5-methoxy-3<br>- arylcoumarin | ADORA1   |

|          |                                                    |         |
|----------|----------------------------------------------------|---------|
| 25015742 | 7,2',4'-trihydroxy – 5-methoxy-3<br>– arylcoumarin | ADORA2A |
| 25015742 | 7,2',4'-trihydroxy – 5-methoxy-3<br>– arylcoumarin | ALDH2   |
| 25015742 | 7,2',4'-trihydroxy – 5-methoxy-3<br>– arylcoumarin | ALOX12  |
| 25015742 | 7,2',4'-trihydroxy – 5-methoxy-3<br>– arylcoumarin | ALOX5   |
| 25015742 | 7,2',4'-trihydroxy – 5-methoxy-3<br>– arylcoumarin | AURKA   |
| 25015742 | 7,2',4'-trihydroxy – 5-methoxy-3<br>– arylcoumarin | BACE1   |
| 25015742 | 7,2',4'-trihydroxy – 5-methoxy-3<br>– arylcoumarin | BCL2L1  |
| 25015742 | 7,2',4'-trihydroxy – 5-methoxy-3<br>– arylcoumarin | CA1     |
| 25015742 | 7,2',4'-trihydroxy – 5-methoxy-3<br>– arylcoumarin | CA12    |
| 25015742 | 7,2',4'-trihydroxy – 5-methoxy-3<br>– arylcoumarin | CA2     |
| 25015742 | 7,2',4'-trihydroxy – 5-methoxy-3<br>– arylcoumarin | CA4     |
| 25015742 | 7,2',4'-trihydroxy – 5-methoxy-3<br>– arylcoumarin | CA7     |
| 25015742 | 7,2',4'-trihydroxy – 5-methoxy-3<br>– arylcoumarin | CAPN1   |
| 25015742 | 7,2',4'-trihydroxy – 5-methoxy-3<br>– arylcoumarin | CBR1    |
| 25015742 | 7,2',4'-trihydroxy – 5-methoxy-3<br>– arylcoumarin | CCNB1   |
| 25015742 | 7,2',4'-trihydroxy – 5-methoxy-3<br>– arylcoumarin | CCNE1   |
| 25015742 | 7,2',4'-trihydroxy – 5-methoxy-3<br>– arylcoumarin | CCNE1   |
| 25015742 | 7,2',4'-trihydroxy – 5-methoxy-3<br>– arylcoumarin | CDC7    |
| 25015742 | 7,2',4'-trihydroxy – 5-methoxy-3<br>– arylcoumarin | CDK1    |
| 25015742 | 7,2',4'-trihydroxy – 5-methoxy-3<br>– arylcoumarin | CDK2    |
| 25015742 | 7,2',4'-trihydroxy – 5-methoxy-3<br>– arylcoumarin | CDK2    |
| 25015742 | 7,2',4'-trihydroxy – 5-methoxy-3<br>– arylcoumarin | CDK3    |

|          |                                                    |          |
|----------|----------------------------------------------------|----------|
| 25015742 | 7,2',4'-trihydroxy – 5-methoxy-3<br>– arylcoumarin | CHEK1    |
| 25015742 | 7,2',4'-trihydroxy – 5-methoxy-3<br>– arylcoumarin | CHRNA7   |
| 25015742 | 7,2',4'-trihydroxy – 5-methoxy-3<br>– arylcoumarin | CLK1     |
| 25015742 | 7,2',4'-trihydroxy – 5-methoxy-3<br>– arylcoumarin | CYP19A1  |
| 25015742 | 7,2',4'-trihydroxy – 5-methoxy-3<br>– arylcoumarin | DRD1     |
| 25015742 | 7,2',4'-trihydroxy – 5-methoxy-3<br>– arylcoumarin | DYRK1B   |
| 25015742 | 7,2',4'-trihydroxy – 5-methoxy-3<br>– arylcoumarin | EGFR     |
| 25015742 | 7,2',4'-trihydroxy – 5-methoxy-3<br>– arylcoumarin | ERBB2    |
| 25015742 | 7,2',4'-trihydroxy – 5-methoxy-3<br>– arylcoumarin | ESR1     |
| 25015742 | 7,2',4'-trihydroxy – 5-methoxy-3<br>– arylcoumarin | ESR2     |
| 25015742 | 7,2',4'-trihydroxy – 5-methoxy-3<br>– arylcoumarin | ESRRA    |
| 25015742 | 7,2',4'-trihydroxy – 5-methoxy-3<br>– arylcoumarin | ESRRB    |
| 25015742 | 7,2',4'-trihydroxy – 5-methoxy-3<br>– arylcoumarin | FGFR1    |
| 25015742 | 7,2',4'-trihydroxy – 5-methoxy-3<br>– arylcoumarin | GRK2     |
| 25015742 | 7,2',4'-trihydroxy – 5-methoxy-3<br>– arylcoumarin | HPGDS    |
| 25015742 | 7,2',4'-trihydroxy – 5-methoxy-3<br>– arylcoumarin | HSD17B1  |
| 25015742 | 7,2',4'-trihydroxy – 5-methoxy-3<br>– arylcoumarin | HSD17B14 |
| 25015742 | 7,2',4'-trihydroxy – 5-methoxy-3<br>– arylcoumarin | HSD17B2  |
| 25015742 | 7,2',4'-trihydroxy – 5-methoxy-3<br>– arylcoumarin | HTR2A    |
| 25015742 | 7,2',4'-trihydroxy – 5-methoxy-3<br>– arylcoumarin | HTR2B    |
| 25015742 | 7,2',4'-trihydroxy – 5-methoxy-3<br>– arylcoumarin | IGF1R    |
| 25015742 | 7,2',4'-trihydroxy – 5-methoxy-3<br>– arylcoumarin | IGFBP3   |

|          |                                                    |          |
|----------|----------------------------------------------------|----------|
| 25015742 | 7,2',4'-trihydroxy – 5-methoxy-3<br>– arylcoumarin | IL2      |
| 25015742 | 7,2',4'-trihydroxy – 5-methoxy-3<br>– arylcoumarin | INSR     |
| 25015742 | 7,2',4'-trihydroxy – 5-methoxy-3<br>– arylcoumarin | KDR      |
| 25015742 | 7,2',4'-trihydroxy – 5-methoxy-3<br>– arylcoumarin | MAOA     |
| 25015742 | 7,2',4'-trihydroxy – 5-methoxy-3<br>– arylcoumarin | MAOB     |
| 25015742 | 7,2',4'-trihydroxy – 5-methoxy-3<br>– arylcoumarin | MAPT     |
| 25015742 | 7,2',4'-trihydroxy – 5-methoxy-3<br>– arylcoumarin | MET      |
| 25015742 | 7,2',4'-trihydroxy – 5-methoxy-3<br>– arylcoumarin | MGAM     |
| 25015742 | 7,2',4'-trihydroxy – 5-methoxy-3<br>– arylcoumarin | MIF      |
| 25015742 | 7,2',4'-trihydroxy – 5-methoxy-3<br>– arylcoumarin | MMP1     |
| 25015742 | 7,2',4'-trihydroxy – 5-methoxy-3<br>– arylcoumarin | MMP2     |
| 25015742 | 7,2',4'-trihydroxy – 5-methoxy-3<br>– arylcoumarin | MMP3     |
| 25015742 | 7,2',4'-trihydroxy – 5-methoxy-3<br>– arylcoumarin | MMP9     |
| 25015742 | 7,2',4'-trihydroxy – 5-methoxy-3<br>– arylcoumarin | NOX4     |
| 25015742 | 7,2',4'-trihydroxy – 5-methoxy-3<br>– arylcoumarin | NQO2     |
| 25015742 | 7,2',4'-trihydroxy – 5-methoxy-3<br>– arylcoumarin | PON1     |
| 25015742 | 7,2',4'-trihydroxy – 5-methoxy-3<br>– arylcoumarin | PPARA    |
| 25015742 | 7,2',4'-trihydroxy – 5-methoxy-3<br>– arylcoumarin | PTGS1    |
| 25015742 | 7,2',4'-trihydroxy – 5-methoxy-3<br>– arylcoumarin | PTPRS    |
| 25015742 | 7,2',4'-trihydroxy – 5-methoxy-3<br>– arylcoumarin | SERPINE1 |
| 25015742 | 7,2',4'-trihydroxy – 5-methoxy-3<br>– arylcoumarin | SIGMAR1  |
| 25015742 | 7,2',4'-trihydroxy – 5-methoxy-3<br>– arylcoumarin | SLC6A2   |

|          |                                                    |          |
|----------|----------------------------------------------------|----------|
| 25015742 | 7,2',4'-trihydroxy – 5-methoxy-3<br>– arylcoumarin | SNCA     |
| 25015742 | 7,2',4'-trihydroxy – 5-methoxy-3<br>– arylcoumarin | SRC      |
| 25015742 | 7,2',4'-trihydroxy – 5-methoxy-3<br>– arylcoumarin | TLR9     |
| 25015742 | 7,2',4'-trihydroxy – 5-methoxy-3<br>– arylcoumarin | TRPM8    |
| 25015742 | 7,2',4'-trihydroxy – 5-methoxy-3<br>– arylcoumarin | TYR      |
| 25015742 | 7,2',4'-trihydroxy – 5-methoxy-3<br>– arylcoumarin | WEE1     |
| 25015742 | 7,2',4'-trihydroxy – 5-methoxy-3<br>– arylcoumarin | XDH      |
| 25015742 | 7,2',4'-trihydroxy – 5-methoxy-3<br>– arylcoumarin | YWHAG    |
| 5317480  | Lupiwighteone                                      | ABCB1    |
| 5317480  | Lupiwighteone                                      | ABCG2    |
| 5317480  | Lupiwighteone                                      | ACHE     |
| 5317480  | Lupiwighteone                                      | AKT1     |
| 5317480  | Lupiwighteone                                      | ALDH2    |
| 5317480  | Lupiwighteone                                      | ALOX12   |
| 5317480  | Lupiwighteone                                      | ALOX15   |
| 5317480  | Lupiwighteone                                      | BACE1    |
| 5317480  | Lupiwighteone                                      | BCL2     |
| 5317480  | Lupiwighteone                                      | CA12     |
| 5317480  | Lupiwighteone                                      | CA4      |
| 5317480  | Lupiwighteone                                      | CCR4     |
| 5317480  | Lupiwighteone                                      | CYP19A1  |
| 5317480  | Lupiwighteone                                      | EGFR     |
| 5317480  | Lupiwighteone                                      | ESR1     |
| 5317480  | Lupiwighteone                                      | ESR2     |
| 5317480  | Lupiwighteone                                      | ESRRA    |
| 5317480  | Lupiwighteone                                      | ESRRB    |
| 5317480  | Lupiwighteone                                      | FNTA     |
| 5317480  | Lupiwighteone                                      | FNTB     |
| 5317480  | Lupiwighteone                                      | GCGR     |
| 5317480  | Lupiwighteone                                      | GPR84    |
| 5317480  | Lupiwighteone                                      | HSD17B1  |
| 5317480  | Lupiwighteone                                      | HSD17B2  |
| 5317480  | Lupiwighteone                                      | HSP90AA1 |
| 5317480  | Lupiwighteone                                      | HSP90AB1 |
| 5317480  | Lupiwighteone                                      | HSP90B1  |
| 5317480  | Lupiwighteone                                      | HTR2A    |

|         |                              |         |
|---------|------------------------------|---------|
| 5317480 | Lupiwighteone                | HTR2C   |
| 5317480 | Lupiwighteone                | IL2     |
| 5317480 | Lupiwighteone                | MAOA    |
| 5317480 | Lupiwighteone                | MGAM    |
| 5317480 | Lupiwighteone                | MIF     |
| 5317480 | Lupiwighteone                | PDE10A  |
| 5317480 | Lupiwighteone                | PDE5A   |
| 5317480 | Lupiwighteone                | PFKFB3  |
| 5317480 | Lupiwighteone                | PTPN1   |
| 5317480 | Lupiwighteone                | RELA    |
| 5317480 | Lupiwighteone                | SIRT1   |
| 5317480 | Lupiwighteone                | TBXAS1  |
| 5317480 | Lupiwighteone                | TYR     |
| 5317480 | Lupiwighteone                | XDH     |
| 268208  | 7-Acetoxy-2-methylisoflavone | ABCB1   |
| 268208  | 7-Acetoxy-2-methylisoflavone | ABCG2   |
| 268208  | 7-Acetoxy-2-methylisoflavone | ADAMTS5 |
| 268208  | 7-Acetoxy-2-methylisoflavone | ADORA1  |
| 268208  | 7-Acetoxy-2-methylisoflavone | ADORA2A |
| 268208  | 7-Acetoxy-2-methylisoflavone | ADORA2B |
| 268208  | 7-Acetoxy-2-methylisoflavone | AGPAT2  |
| 268208  | 7-Acetoxy-2-methylisoflavone | ALDH2   |
| 268208  | 7-Acetoxy-2-methylisoflavone | APH1A   |
| 268208  | 7-Acetoxy-2-methylisoflavone | APH1B   |
| 268208  | 7-Acetoxy-2-methylisoflavone | AURKA   |
| 268208  | 7-Acetoxy-2-methylisoflavone | CA1     |
| 268208  | 7-Acetoxy-2-methylisoflavone | CA12    |
| 268208  | 7-Acetoxy-2-methylisoflavone | CA2     |
| 268208  | 7-Acetoxy-2-methylisoflavone | CA4     |
| 268208  | 7-Acetoxy-2-methylisoflavone | CA7     |
| 268208  | 7-Acetoxy-2-methylisoflavone | CBR1    |
| 268208  | 7-Acetoxy-2-methylisoflavone | CCNB1   |
| 268208  | 7-Acetoxy-2-methylisoflavone | CCND1   |
| 268208  | 7-Acetoxy-2-methylisoflavone | CCNE1   |
| 268208  | 7-Acetoxy-2-methylisoflavone | CCNE2   |
| 268208  | 7-Acetoxy-2-methylisoflavone | CCNT1   |
| 268208  | 7-Acetoxy-2-methylisoflavone | CDC7    |
| 268208  | 7-Acetoxy-2-methylisoflavone | CDC7    |
| 268208  | 7-Acetoxy-2-methylisoflavone | CDK1    |
| 268208  | 7-Acetoxy-2-methylisoflavone | CDK2    |
| 268208  | 7-Acetoxy-2-methylisoflavone | CDK4    |
| 268208  | 7-Acetoxy-2-methylisoflavone | CDK9    |
| 268208  | 7-Acetoxy-2-methylisoflavone | CDK9    |
| 268208  | 7-Acetoxy-2-methylisoflavone | CHEK1   |

|        |                              |         |
|--------|------------------------------|---------|
| 268208 | 7-Acetoxy-2-methylisoflavone | CRHR1   |
| 268208 | 7-Acetoxy-2-methylisoflavone | CSF1R   |
| 268208 | 7-Acetoxy-2-methylisoflavone | CYP17A1 |
| 268208 | 7-Acetoxy-2-methylisoflavone | CYP19A1 |
| 268208 | 7-Acetoxy-2-methylisoflavone | DBF4    |
| 268208 | 7-Acetoxy-2-methylisoflavone | DHFR    |
| 268208 | 7-Acetoxy-2-methylisoflavone | DHODH   |
| 268208 | 7-Acetoxy-2-methylisoflavone | DYRK1A  |
| 268208 | 7-Acetoxy-2-methylisoflavone | EGFR    |
| 268208 | 7-Acetoxy-2-methylisoflavone | EPHX1   |
| 268208 | 7-Acetoxy-2-methylisoflavone | EPHX2   |
| 268208 | 7-Acetoxy-2-methylisoflavone | ESR2    |
| 268208 | 7-Acetoxy-2-methylisoflavone | ESRRB   |
| 268208 | 7-Acetoxy-2-methylisoflavone | FNTA    |
| 268208 | 7-Acetoxy-2-methylisoflavone | FNTB    |
| 268208 | 7-Acetoxy-2-methylisoflavone | GABRA1  |
| 268208 | 7-Acetoxy-2-methylisoflavone | GABRA2  |
| 268208 | 7-Acetoxy-2-methylisoflavone | GABRA3  |
| 268208 | 7-Acetoxy-2-methylisoflavone | GABRA5  |
| 268208 | 7-Acetoxy-2-methylisoflavone | GABRB3  |
| 268208 | 7-Acetoxy-2-methylisoflavone | GABRB3  |
| 268208 | 7-Acetoxy-2-methylisoflavone | GABRB3  |
| 268208 | 7-Acetoxy-2-methylisoflavone | GABRB3  |
| 268208 | 7-Acetoxy-2-methylisoflavone | GABRB3  |
| 268208 | 7-Acetoxy-2-methylisoflavone | GABRG2  |
| 268208 | 7-Acetoxy-2-methylisoflavone | GABRG2  |
| 268208 | 7-Acetoxy-2-methylisoflavone | GABRG2  |
| 268208 | 7-Acetoxy-2-methylisoflavone | GABRG2  |
| 268208 | 7-Acetoxy-2-methylisoflavone | GCK     |
| 268208 | 7-Acetoxy-2-methylisoflavone | GRIA2   |
| 268208 | 7-Acetoxy-2-methylisoflavone | GRIN1   |
| 268208 | 7-Acetoxy-2-methylisoflavone | GRIN2A  |
| 268208 | 7-Acetoxy-2-methylisoflavone | GRM1    |
| 268208 | 7-Acetoxy-2-methylisoflavone | GRM5    |
| 268208 | 7-Acetoxy-2-methylisoflavone | HSD17B1 |
| 268208 | 7-Acetoxy-2-methylisoflavone | HSD17B2 |
| 268208 | 7-Acetoxy-2-methylisoflavone | HTR2A   |
| 268208 | 7-Acetoxy-2-methylisoflavone | HTR2C   |
| 268208 | 7-Acetoxy-2-methylisoflavone | IL2     |
| 268208 | 7-Acetoxy-2-methylisoflavone | IRAK4   |
| 268208 | 7-Acetoxy-2-methylisoflavone | JAK2    |
| 268208 | 7-Acetoxy-2-methylisoflavone | JAK3    |
| 268208 | 7-Acetoxy-2-methylisoflavone | KAT2B   |
| 268208 | 7-Acetoxy-2-methylisoflavone | KCNH2   |
| 268208 | 7-Acetoxy-2-methylisoflavone | KCNK3   |

|        |                              |          |
|--------|------------------------------|----------|
| 268208 | 7-Acetoxy-2-methylisoflavone | KCNK9    |
| 268208 | 7-Acetoxy-2-methylisoflavone | KDM4A    |
| 268208 | 7-Acetoxy-2-methylisoflavone | KDM4C    |
| 268208 | 7-Acetoxy-2-methylisoflavone | KDM4D    |
| 268208 | 7-Acetoxy-2-methylisoflavone | KDM5C    |
| 268208 | 7-Acetoxy-2-methylisoflavone | LRRK2    |
| 268208 | 7-Acetoxy-2-methylisoflavone | MAOA     |
| 268208 | 7-Acetoxy-2-methylisoflavone | MAOB     |
| 268208 | 7-Acetoxy-2-methylisoflavone | MAPK10   |
| 268208 | 7-Acetoxy-2-methylisoflavone | MAPK8    |
| 268208 | 7-Acetoxy-2-methylisoflavone | MAPKAPK2 |
| 268208 | 7-Acetoxy-2-methylisoflavone | MGAM     |
| 268208 | 7-Acetoxy-2-methylisoflavone | NAAA     |
| 268208 | 7-Acetoxy-2-methylisoflavone | NCSTN    |
| 268208 | 7-Acetoxy-2-methylisoflavone | NR1H4    |
| 268208 | 7-Acetoxy-2-methylisoflavone | NR3C1    |
| 268208 | 7-Acetoxy-2-methylisoflavone | NR3C2    |
| 268208 | 7-Acetoxy-2-methylisoflavone | NTRK1    |
| 268208 | 7-Acetoxy-2-methylisoflavone | PDE10A   |
| 268208 | 7-Acetoxy-2-methylisoflavone | PDGFRA   |
| 268208 | 7-Acetoxy-2-methylisoflavone | PDGFRB   |
| 268208 | 7-Acetoxy-2-methylisoflavone | PFKFB3   |
| 268208 | 7-Acetoxy-2-methylisoflavone | PGK1     |
| 268208 | 7-Acetoxy-2-methylisoflavone | PGR      |
| 268208 | 7-Acetoxy-2-methylisoflavone | PIK3CA   |
| 268208 | 7-Acetoxy-2-methylisoflavone | PIK3CB   |
| 268208 | 7-Acetoxy-2-methylisoflavone | PIK3CD   |
| 268208 | 7-Acetoxy-2-methylisoflavone | PIK3CD   |
| 268208 | 7-Acetoxy-2-methylisoflavone | PIK3R1   |
| 268208 | 7-Acetoxy-2-methylisoflavone | PRF1     |
| 268208 | 7-Acetoxy-2-methylisoflavone | PRKCQ    |
| 268208 | 7-Acetoxy-2-methylisoflavone | PROKR1   |
| 268208 | 7-Acetoxy-2-methylisoflavone | PSEN1    |
| 268208 | 7-Acetoxy-2-methylisoflavone | PSEN2    |
| 268208 | 7-Acetoxy-2-methylisoflavone | PSENEN   |
| 268208 | 7-Acetoxy-2-methylisoflavone | PTGES    |
| 268208 | 7-Acetoxy-2-methylisoflavone | PTGS1    |
| 268208 | 7-Acetoxy-2-methylisoflavone | QPCT     |
| 268208 | 7-Acetoxy-2-methylisoflavone | RET      |
| 268208 | 7-Acetoxy-2-methylisoflavone | SCD      |
| 268208 | 7-Acetoxy-2-methylisoflavone | SHH      |
| 268208 | 7-Acetoxy-2-methylisoflavone | SIRT2    |
| 268208 | 7-Acetoxy-2-methylisoflavone | SLC6A2   |
| 268208 | 7-Acetoxy-2-methylisoflavone | TBXAS1   |



|        |                              |         |
|--------|------------------------------|---------|
| 268208 | 7-Acetoxy-2-methylisoflavone | TGFB1   |
| 268208 | 7-Acetoxy-2-methylisoflavone | TGFBR1  |
| 268208 | 7-Acetoxy-2-methylisoflavone | TRPA1   |
| 268208 | 7-Acetoxy-2-methylisoflavone | TRPM8   |
| 268208 | 7-Acetoxy-2-methylisoflavone | TYMS    |
| 177149 | Vestitol                     | ABL1    |
| 177149 | Vestitol                     | ADAM17  |
| 177149 | Vestitol                     | ADCY5   |
| 177149 | Vestitol                     | ADORA2A |
| 177149 | Vestitol                     | ADORA2B |
| 177149 | Vestitol                     | AKR1B10 |
| 177149 | Vestitol                     | ALOX12  |
| 177149 | Vestitol                     | ALOX15  |
| 177149 | Vestitol                     | ALOX15B |
| 177149 | Vestitol                     | ALPL    |
| 177149 | Vestitol                     | AURKA   |
| 177149 | Vestitol                     | AURKB   |
| 177149 | Vestitol                     | BCHE    |
| 177149 | Vestitol                     | BRAF    |
| 177149 | Vestitol                     | CA14    |
| 177149 | Vestitol                     | CASP3   |
| 177149 | Vestitol                     | CASP7   |
| 177149 | Vestitol                     | CCNB1   |
| 177149 | Vestitol                     | CCNB2   |
| 177149 | Vestitol                     | CCNB3   |
| 177149 | Vestitol                     | CCNE1   |
| 177149 | Vestitol                     | CCNE1   |
| 177149 | Vestitol                     | CDK1    |
| 177149 | Vestitol                     | CDK1    |
| 177149 | Vestitol                     | CDK2    |
| 177149 | Vestitol                     | CDK2    |
| 177149 | Vestitol                     | CDK3    |
| 177149 | Vestitol                     | CDK4    |
| 177149 | Vestitol                     | CDK5    |
| 177149 | Vestitol                     | CDK5R1  |
| 177149 | Vestitol                     | CHEK1   |
| 177149 | Vestitol                     | CHRNA7  |
| 177149 | Vestitol                     | CLK1    |
| 177149 | Vestitol                     | COMT    |
| 177149 | Vestitol                     | CTSS    |
| 177149 | Vestitol                     | CYP19A1 |
| 177149 | Vestitol                     | CYP24A1 |
| 177149 | Vestitol                     | DRD2    |
| 177149 | Vestitol                     | DUSP3   |

|        |          |          |
|--------|----------|----------|
| 177149 | Vestitol | DYRK1B   |
| 177149 | Vestitol | EIF2AK2  |
| 177149 | Vestitol | ESR1     |
| 177149 | Vestitol | ESR2     |
| 177149 | Vestitol | ESRRA    |
| 177149 | Vestitol | ESRRB    |
| 177149 | Vestitol | EZR      |
| 177149 | Vestitol | F3       |
| 177149 | Vestitol | GRIA1    |
| 177149 | Vestitol | GRK6     |
| 177149 | Vestitol | GSK3B    |
| 177149 | Vestitol | GSTM2    |
| 177149 | Vestitol | GSTP1    |
| 177149 | Vestitol | HDAC10   |
| 177149 | Vestitol | HDAC11   |
| 177149 | Vestitol | HDAC2    |
| 177149 | Vestitol | HDAC3    |
| 177149 | Vestitol | HDAC9    |
| 177149 | Vestitol | HSD17B14 |
| 177149 | Vestitol | HSD17B2  |
| 177149 | Vestitol | HSD17B3  |
| 177149 | Vestitol | HSP90AA1 |
| 177149 | Vestitol | HSP90AB1 |
| 177149 | Vestitol | HTR2A    |
| 177149 | Vestitol | HTT      |
| 177149 | Vestitol | IGF1R    |
| 177149 | Vestitol | INSR     |
| 177149 | Vestitol | KIF11    |
| 177149 | Vestitol | LCK      |
| 177149 | Vestitol | LIMK1    |
| 177149 | Vestitol | LNPEP    |
| 177149 | Vestitol | MAOB     |
| 177149 | Vestitol | MAP2K1   |
| 177149 | Vestitol | MAPKAPK2 |
| 177149 | Vestitol | MCL1     |
| 177149 | Vestitol | MIF      |
| 177149 | Vestitol | NOX1     |
| 177149 | Vestitol | NOX4     |
| 177149 | Vestitol | PDE7A    |
| 177149 | Vestitol | PDK1     |
| 177149 | Vestitol | PFKFB3   |
| 177149 | Vestitol | PIK3CA   |
| 177149 | Vestitol | PIK3CD   |
| 177149 | Vestitol | PIK3CG   |

|        |             |         |
|--------|-------------|---------|
| 177149 | Vestitol    | PIM1    |
| 177149 | Vestitol    | PIM2    |
| 177149 | Vestitol    | PIM3    |
| 177149 | Vestitol    | PLK1    |
| 177149 | Vestitol    | PRF1    |
| 177149 | Vestitol    | PRKACA  |
| 177149 | Vestitol    | PRKCA   |
| 177149 | Vestitol    | PTGS1   |
| 177149 | Vestitol    | PTGS2   |
| 177149 | Vestitol    | PTPN1   |
| 177149 | Vestitol    | RAF1    |
| 177149 | Vestitol    | RET     |
| 177149 | Vestitol    | ROCK1   |
| 177149 | Vestitol    | RPS6KB1 |
| 177149 | Vestitol    | SIGMAR1 |
| 177149 | Vestitol    | SNCA    |
| 177149 | Vestitol    | TAAR1   |
| 177149 | Vestitol    | TNKS    |
| 177149 | Vestitol    | TNKS2   |
| 177149 | Vestitol    | TRPM8   |
| 177149 | Vestitol    | TYR     |
| 177149 | Vestitol    | VCP     |
| 177149 | Vestitol    | WEE1    |
| 480780 | Gancaonin G | ABCG2   |
| 480780 | Gancaonin G | ACHE    |
| 480780 | Gancaonin G | ADAM17  |
| 480780 | Gancaonin G | ADORA1  |
| 480780 | Gancaonin G | ADORA2A |
| 480780 | Gancaonin G | ADORA2B |
| 480780 | Gancaonin G | ALDH2   |
| 480780 | Gancaonin G | APP     |
| 480780 | Gancaonin G | AURKA   |
| 480780 | Gancaonin G | BLK     |
| 480780 | Gancaonin G | BMP1    |
| 480780 | Gancaonin G | BMX     |
| 480780 | Gancaonin G | BTK     |
| 480780 | Gancaonin G | CA12    |
| 480780 | Gancaonin G | CA4     |
| 480780 | Gancaonin G | CA7     |
| 480780 | Gancaonin G | CBR1    |
| 480780 | Gancaonin G | CCNB1   |
| 480780 | Gancaonin G | CCNE1   |
| 480780 | Gancaonin G | CCNE1   |
| 480780 | Gancaonin G | CDK1    |

|        |             |         |
|--------|-------------|---------|
| 480780 | Gancaonin G | CDK2    |
| 480780 | Gancaonin G | CDK2    |
| 480780 | Gancaonin G | CDK3    |
| 480780 | Gancaonin G | CES1    |
| 480780 | Gancaonin G | CES2    |
| 480780 | Gancaonin G | CHEK1   |
| 480780 | Gancaonin G | CMA1    |
| 480780 | Gancaonin G | COMT    |
| 480780 | Gancaonin G | COQ8B   |
| 480780 | Gancaonin G | CPT1A   |
| 480780 | Gancaonin G | CSK     |
| 480780 | Gancaonin G | CTSK    |
| 480780 | Gancaonin G | CYP19A1 |
| 480780 | Gancaonin G | EGFR    |
| 480780 | Gancaonin G | EPHA1   |
| 480780 | Gancaonin G | EPHA2   |
| 480780 | Gancaonin G | EPHA3   |
| 480780 | Gancaonin G | EPHA4   |
| 480780 | Gancaonin G | EPHA5   |
| 480780 | Gancaonin G | EPHA6   |
| 480780 | Gancaonin G | EPHB2   |
| 480780 | Gancaonin G | EPHB3   |
| 480780 | Gancaonin G | ESR1    |
| 480780 | Gancaonin G | ESR2    |
| 480780 | Gancaonin G | ESRRA   |
| 480780 | Gancaonin G | ESRRB   |
| 480780 | Gancaonin G | FCER2   |
| 480780 | Gancaonin G | FGR     |
| 480780 | Gancaonin G | FOLH1   |
| 480780 | Gancaonin G | FYN     |
| 480780 | Gancaonin G | HDAC1   |
| 480780 | Gancaonin G | HDAC10  |
| 480780 | Gancaonin G | HDAC2   |
| 480780 | Gancaonin G | HDAC3   |
| 480780 | Gancaonin G | HDAC4   |
| 480780 | Gancaonin G | HDAC6   |
| 480780 | Gancaonin G | HDAC8   |
| 480780 | Gancaonin G | HPGDS   |
| 480780 | Gancaonin G | HSD17B1 |
| 480780 | Gancaonin G | HSD17B2 |
| 480780 | Gancaonin G | HTR2A   |
| 480780 | Gancaonin G | LCK     |
| 480780 | Gancaonin G | LYN     |
| 480780 | Gancaonin G | MAOA    |

|         |             |         |
|---------|-------------|---------|
| 480780  | Gancaonin G | MAP2K1  |
| 480780  | Gancaonin G | MAPK8   |
| 480780  | Gancaonin G | ME1     |
| 480780  | Gancaonin G | MERTK   |
| 480780  | Gancaonin G | MGAM    |
| 480780  | Gancaonin G | MIF     |
| 480780  | Gancaonin G | MMP1    |
| 480780  | Gancaonin G | MMP13   |
| 480780  | Gancaonin G | MMP2    |
| 480780  | Gancaonin G | MMP3    |
| 480780  | Gancaonin G | MMP7    |
| 480780  | Gancaonin G | MMP9    |
| 480780  | Gancaonin G | MTOR    |
| 480780  | Gancaonin G | NAMPT   |
| 480780  | Gancaonin G | NFKB1   |
| 480780  | Gancaonin G | ODC1    |
| 480780  | Gancaonin G | PAK4    |
| 480780  | Gancaonin G | PDE10A  |
| 480780  | Gancaonin G | PDE4A   |
| 480780  | Gancaonin G | PDE4B   |
| 480780  | Gancaonin G | PDE4C   |
| 480780  | Gancaonin G | PDE4D   |
| 480780  | Gancaonin G | PDE7A   |
| 480780  | Gancaonin G | PDGFRB  |
| 480780  | Gancaonin G | PIK3CA  |
| 480780  | Gancaonin G | PPARG   |
| 480780  | Gancaonin G | PTGS1   |
| 480780  | Gancaonin G | PTK6    |
| 480780  | Gancaonin G | PTPN1   |
| 480780  | Gancaonin G | ROCK1   |
| 480780  | Gancaonin G | ROCK2   |
| 480780  | Gancaonin G | RPS6KB1 |
| 480780  | Gancaonin G | SCD     |
| 480780  | Gancaonin G | SLC6A2  |
| 480780  | Gancaonin G | TACR3   |
| 480780  | Gancaonin G | TXK     |
| 480780  | Gancaonin G | TYRO3   |
| 480780  | Gancaonin G | YES1    |
| 5481949 | Gancaonin H | ACHE    |
| 5481949 | Gancaonin H | AGTR1   |
| 5481949 | Gancaonin H | CHEK1   |
| 5481949 | Gancaonin H | F10     |
| 5481949 | Gancaonin H | F2      |
| 5481949 | Gancaonin H | GCGR    |

|          |                |          |
|----------|----------------|----------|
| 5481949  | Gancaonin H    | HSP90AA1 |
| 5481949  | Gancaonin H    | KISS1R   |
| 5481949  | Gancaonin H    | MELK     |
| 5481949  | Gancaonin H    | MTOR     |
| 5481949  | Gancaonin H    | PDK1     |
| 5481949  | Gancaonin H    | PIK3CA   |
| 5481949  | Gancaonin H    | PRKCA    |
| 5481949  | Gancaonin H    | PRKCB    |
| 5481949  | Gancaonin H    | PRKCD    |
| 5481949  | Gancaonin H    | PRKCE    |
| 5481949  | Gancaonin H    | PTPN1    |
| 5481949  | Gancaonin H    | RARA     |
| 5481949  | Gancaonin H    | WEE1     |
| 15840593 | Licoagrocarpin | ABCG2    |
| 15840593 | Licoagrocarpin | ABL1     |
| 15840593 | Licoagrocarpin | ADAM17   |
| 15840593 | Licoagrocarpin | ADAM33   |
| 15840593 | Licoagrocarpin | ADAMTS5  |
| 15840593 | Licoagrocarpin | AKR1B10  |
| 15840593 | Licoagrocarpin | ALK      |
| 15840593 | Licoagrocarpin | APH1A    |
| 15840593 | Licoagrocarpin | APH1B    |
| 15840593 | Licoagrocarpin | AURKA    |
| 15840593 | Licoagrocarpin | AURKB    |
| 15840593 | Licoagrocarpin | BMP1     |
| 15840593 | Licoagrocarpin | BRAF     |
| 15840593 | Licoagrocarpin | BRD4     |
| 15840593 | Licoagrocarpin | CAPN1    |
| 15840593 | Licoagrocarpin | CCNB1    |
| 15840593 | Licoagrocarpin | CCND1    |
| 15840593 | Licoagrocarpin | CCNE1    |
| 15840593 | Licoagrocarpin | CCNE1    |
| 15840593 | Licoagrocarpin | CCNE1    |
| 15840593 | Licoagrocarpin | CCNE1    |
| 15840593 | Licoagrocarpin | CCNE2    |
| 15840593 | Licoagrocarpin | CDK1     |
| 15840593 | Licoagrocarpin | CDK1     |
| 15840593 | Licoagrocarpin | CDK2     |
| 15840593 | Licoagrocarpin | CDK2     |
| 15840593 | Licoagrocarpin | CDK2     |
| 15840593 | Licoagrocarpin | CDK3     |
| 15840593 | Licoagrocarpin | CDK4     |
| 15840593 | Licoagrocarpin | CDK4     |
| 15840593 | Licoagrocarpin | CFD      |
| 15840593 | Licoagrocarpin | CHEK1    |

|          |                |          |
|----------|----------------|----------|
| 15840593 | Licoagrocarpin | CLK1     |
| 15840593 | Licoagrocarpin | CRHR1    |
| 15840593 | Licoagrocarpin | CTSD     |
| 15840593 | Licoagrocarpin | DHFR     |
| 15840593 | Licoagrocarpin | DPP4     |
| 15840593 | Licoagrocarpin | DRD1     |
| 15840593 | Licoagrocarpin | DYRK1B   |
| 15840593 | Licoagrocarpin | EPHA1    |
| 15840593 | Licoagrocarpin | EPHA2    |
| 15840593 | Licoagrocarpin | EPHA3    |
| 15840593 | Licoagrocarpin | EPHA4    |
| 15840593 | Licoagrocarpin | EPHA5    |
| 15840593 | Licoagrocarpin | EPHA7    |
| 15840593 | Licoagrocarpin | EPHA8    |
| 15840593 | Licoagrocarpin | EPHB1    |
| 15840593 | Licoagrocarpin | EPHB2    |
| 15840593 | Licoagrocarpin | EPHB3    |
| 15840593 | Licoagrocarpin | EPHB4    |
| 15840593 | Licoagrocarpin | ERN1     |
| 15840593 | Licoagrocarpin | EZR      |
| 15840593 | Licoagrocarpin | FLT3     |
| 15840593 | Licoagrocarpin | FLT4     |
| 15840593 | Licoagrocarpin | GCGR     |
| 15840593 | Licoagrocarpin | GSK3B    |
| 15840593 | Licoagrocarpin | HCRTR1   |
| 15840593 | Licoagrocarpin | HCRTR2   |
| 15840593 | Licoagrocarpin | HDAC1    |
| 15840593 | Licoagrocarpin | HSD11B1  |
| 15840593 | Licoagrocarpin | HSD17B2  |
| 15840593 | Licoagrocarpin | HSP90AB1 |
| 15840593 | Licoagrocarpin | LCK      |
| 15840593 | Licoagrocarpin | LDHA     |
| 15840593 | Licoagrocarpin | MAP2K2   |
| 15840593 | Licoagrocarpin | MAPK8    |
| 15840593 | Licoagrocarpin | MARS     |
| 15840593 | Licoagrocarpin | MMP1     |
| 15840593 | Licoagrocarpin | MMP3     |
| 15840593 | Licoagrocarpin | MMP7     |
| 15840593 | Licoagrocarpin | MYLK     |
| 15840593 | Licoagrocarpin | NCSTN    |
| 15840593 | Licoagrocarpin | NR3C2    |
| 15840593 | Licoagrocarpin | OPRK1    |
| 15840593 | Licoagrocarpin | OXTR     |
| 15840593 | Licoagrocarpin | PARP1    |

|          |                        |         |
|----------|------------------------|---------|
| 15840593 | Licoagrocarpin         | PDE10A  |
| 15840593 | Licoagrocarpin         | PDE5A   |
| 15840593 | Licoagrocarpin         | PDE6C   |
| 15840593 | Licoagrocarpin         | PDF     |
| 15840593 | Licoagrocarpin         | PDGFRA  |
| 15840593 | Licoagrocarpin         | PDGFRB  |
| 15840593 | Licoagrocarpin         | PDK1    |
| 15840593 | Licoagrocarpin         | PRKCZ   |
| 15840593 | Licoagrocarpin         | PSEN1   |
| 15840593 | Licoagrocarpin         | PSEN2   |
| 15840593 | Licoagrocarpin         | PSENEN  |
| 15840593 | Licoagrocarpin         | PTK2B   |
| 15840593 | Licoagrocarpin         | PTPN1   |
| 15840593 | Licoagrocarpin         | RAF1    |
| 15840593 | Licoagrocarpin         | RET     |
| 15840593 | Licoagrocarpin         | RORC    |
| 15840593 | Licoagrocarpin         | ROS1    |
| 15840593 | Licoagrocarpin         | RPS6KB1 |
| 15840593 | Licoagrocarpin         | S1PR1   |
| 15840593 | Licoagrocarpin         | S1PR3   |
| 15840593 | Licoagrocarpin         | SIGMAR1 |
| 15840593 | Licoagrocarpin         | SLC29A1 |
| 15840593 | Licoagrocarpin         | SMARCA2 |
| 15840593 | Licoagrocarpin         | STAT3   |
| 15840593 | Licoagrocarpin         | STAT6   |
| 15840593 | Licoagrocarpin         | SYK     |
| 15840593 | Licoagrocarpin         | TGFBR1  |
| 15840593 | Licoagrocarpin         | TGM2    |
| 15840593 | Licoagrocarpin         | THRA    |
| 15840593 | Licoagrocarpin         | TLR9    |
| 15840593 | Licoagrocarpin         | TNKS    |
| 15840593 | Licoagrocarpin         | TNKS2   |
| 15840593 | Licoagrocarpin         | TRPM8   |
| 15840593 | Licoagrocarpin         | TUBB1   |
| 15840593 | Licoagrocarpin         | TYR     |
| 15840593 | Licoagrocarpin         | WEE1    |
| 5317765  | Glycyrrhiza flavonol A | ADRB1   |
| 5317765  | Glycyrrhiza flavonol A | ADRB2   |
| 5317765  | Glycyrrhiza flavonol A | AHR     |
| 5317765  | Glycyrrhiza flavonol A | BACE1   |
| 5317765  | Glycyrrhiza flavonol A | CHEK1   |
| 5317765  | Glycyrrhiza flavonol A | CHEK2   |
| 5317765  | Glycyrrhiza flavonol A | CYP19A1 |
| 5317765  | Glycyrrhiza flavonol A | ESRRA   |



|         |                        |          |
|---------|------------------------|----------|
| 5317765 | Glycyrrhiza flavonol A | GCGR     |
| 5317765 | Glycyrrhiza flavonol A | HIF1A    |
| 5317765 | Glycyrrhiza flavonol A | HSP90AA1 |
| 5317765 | Glycyrrhiza flavonol A | HSP90AB1 |
| 5317765 | Glycyrrhiza flavonol A | RPS6KA3  |
| 5317765 | Glycyrrhiza flavonol A | TYR      |
| 5317765 | Glycyrrhiza flavonol A | WEE1     |
| 5317765 | Glycyrrhiza flavonol A | XDH      |
| 636883  | Licoagroisoflavone     | ACACB    |
| 636883  | Licoagroisoflavone     | ACHE     |
| 636883  | Licoagroisoflavone     | ACVR1    |
| 636883  | Licoagroisoflavone     | ADAM17   |
| 636883  | Licoagroisoflavone     | ADAMTS4  |
| 636883  | Licoagroisoflavone     | ADAMTS5  |
| 636883  | Licoagroisoflavone     | AKR1B10  |
| 636883  | Licoagroisoflavone     | AKT2     |
| 636883  | Licoagroisoflavone     | ALDH2    |
| 636883  | Licoagroisoflavone     | ALPL     |
| 636883  | Licoagroisoflavone     | APP      |
| 636883  | Licoagroisoflavone     | AURKA    |
| 636883  | Licoagroisoflavone     | AURKB    |
| 636883  | Licoagroisoflavone     | BLK      |
| 636883  | Licoagroisoflavone     | BMP4     |
| 636883  | Licoagroisoflavone     | BMX      |
| 636883  | Licoagroisoflavone     | BRAF     |
| 636883  | Licoagroisoflavone     | BTK      |
| 636883  | Licoagroisoflavone     | CCNA1    |
| 636883  | Licoagroisoflavone     | CCNA2    |
| 636883  | Licoagroisoflavone     | CDC25A   |
| 636883  | Licoagroisoflavone     | CDC25B   |
| 636883  | Licoagroisoflavone     | CDK1     |
| 636883  | Licoagroisoflavone     | CDK2     |
| 636883  | Licoagroisoflavone     | CDK2     |
| 636883  | Licoagroisoflavone     | CDK4     |
| 636883  | Licoagroisoflavone     | CES1     |
| 636883  | Licoagroisoflavone     | CES2     |
| 636883  | Licoagroisoflavone     | CHEK1    |
| 636883  | Licoagroisoflavone     | COMT     |
| 636883  | Licoagroisoflavone     | COQ8B    |
| 636883  | Licoagroisoflavone     | CSF1R    |
| 636883  | Licoagroisoflavone     | CSK      |
| 636883  | Licoagroisoflavone     | DNM1     |
| 636883  | Licoagroisoflavone     | EPHA1    |
| 636883  | Licoagroisoflavone     | EPHA2    |

|        |                    |         |
|--------|--------------------|---------|
| 636883 | Licoagroisoflavone | EPHA3   |
| 636883 | Licoagroisoflavone | EPHA4   |
| 636883 | Licoagroisoflavone | EPHA5   |
| 636883 | Licoagroisoflavone | EPHA6   |
| 636883 | Licoagroisoflavone | EPHB2   |
| 636883 | Licoagroisoflavone | EPHB3   |
| 636883 | Licoagroisoflavone | EPHB4   |
| 636883 | Licoagroisoflavone | ERBB2   |
| 636883 | Licoagroisoflavone | ERN1    |
| 636883 | Licoagroisoflavone | F10     |
| 636883 | Licoagroisoflavone | FGR     |
| 636883 | Licoagroisoflavone | FYN     |
| 636883 | Licoagroisoflavone | GCGR    |
| 636883 | Licoagroisoflavone | GSK3A   |
| 636883 | Licoagroisoflavone | GSK3B   |
| 636883 | Licoagroisoflavone | HDAC3   |
| 636883 | Licoagroisoflavone | HDAC4   |
| 636883 | Licoagroisoflavone | HPGDS   |
| 636883 | Licoagroisoflavone | HSD11B1 |
| 636883 | Licoagroisoflavone | HSD17B2 |
| 636883 | Licoagroisoflavone | HSD17B3 |
| 636883 | Licoagroisoflavone | IRAK4   |
| 636883 | Licoagroisoflavone | KDR     |
| 636883 | Licoagroisoflavone | KIT     |
| 636883 | Licoagroisoflavone | LCK     |
| 636883 | Licoagroisoflavone | LYN     |
| 636883 | Licoagroisoflavone | MAPK14  |
| 636883 | Licoagroisoflavone | MAPT    |
| 636883 | Licoagroisoflavone | ME1     |
| 636883 | Licoagroisoflavone | MET     |
| 636883 | Licoagroisoflavone | MMP1    |
| 636883 | Licoagroisoflavone | MMP13   |
| 636883 | Licoagroisoflavone | MMP14   |
| 636883 | Licoagroisoflavone | MMP2    |
| 636883 | Licoagroisoflavone | MMP9    |
| 636883 | Licoagroisoflavone | NAMPT   |
| 636883 | Licoagroisoflavone | NOX1    |
| 636883 | Licoagroisoflavone | NR1H4   |
| 636883 | Licoagroisoflavone | ODC1    |
| 636883 | Licoagroisoflavone | PARP1   |
| 636883 | Licoagroisoflavone | PDE4A   |
| 636883 | Licoagroisoflavone | PDE4B   |
| 636883 | Licoagroisoflavone | PDE4C   |
| 636883 | Licoagroisoflavone | PDGFRA  |

|          |                    |         |
|----------|--------------------|---------|
| 636883   | Licoagroisoflavone | PDGFRB  |
| 636883   | Licoagroisoflavone | PDK1    |
| 636883   | Licoagroisoflavone | PIK3CA  |
| 636883   | Licoagroisoflavone | PLAA    |
| 636883   | Licoagroisoflavone | PTGES   |
| 636883   | Licoagroisoflavone | PTK6    |
| 636883   | Licoagroisoflavone | RET     |
| 636883   | Licoagroisoflavone | ROCK1   |
| 636883   | Licoagroisoflavone | ROCK2   |
| 636883   | Licoagroisoflavone | SCD     |
| 636883   | Licoagroisoflavone | SNCA    |
| 636883   | Licoagroisoflavone | SRC     |
| 636883   | Licoagroisoflavone | STK17B  |
| 636883   | Licoagroisoflavone | SYK     |
| 636883   | Licoagroisoflavone | TAS2R31 |
| 636883   | Licoagroisoflavone | TGFBR1  |
| 636883   | Licoagroisoflavone | THRA    |
| 636883   | Licoagroisoflavone | TRPV1   |
| 636883   | Licoagroisoflavone | TXK     |
| 636883   | Licoagroisoflavone | TYRO3   |
| 636883   | Licoagroisoflavone | WEE1    |
| 636883   | Licoagroisoflavone | YES1    |
| 13965473 | Odoratin           | ABCB1   |
| 13965473 | Odoratin           | ABCG2   |
| 13965473 | Odoratin           | ACHE    |
| 13965473 | Odoratin           | ADORA1  |
| 13965473 | Odoratin           | ADORA2A |
| 13965473 | Odoratin           | AKR1B1  |
| 13965473 | Odoratin           | ALDH2   |
| 13965473 | Odoratin           | ALOX12  |
| 13965473 | Odoratin           | ALOX15  |
| 13965473 | Odoratin           | ALPL    |
| 13965473 | Odoratin           | BACE1   |
| 13965473 | Odoratin           | CA1     |
| 13965473 | Odoratin           | CA12    |
| 13965473 | Odoratin           | CA2     |
| 13965473 | Odoratin           | CA4     |
| 13965473 | Odoratin           | CA7     |
| 13965473 | Odoratin           | CBR1    |
| 13965473 | Odoratin           | CDC25B  |
| 13965473 | Odoratin           | CHEK1   |
| 13965473 | Odoratin           | CYP19A1 |
| 13965473 | Odoratin           | DUSP3   |
| 13965473 | Odoratin           | EGFR    |

|          |           |          |
|----------|-----------|----------|
| 13965473 | Odoratin  | ESR1     |
| 13965473 | Odoratin  | ESR2     |
| 13965473 | Odoratin  | ESRRA    |
| 13965473 | Odoratin  | ESRRB    |
| 13965473 | Odoratin  | GCGR     |
| 13965473 | Odoratin  | HSD17B1  |
| 13965473 | Odoratin  | HSD17B2  |
| 13965473 | Odoratin  | HSP90AA1 |
| 13965473 | Odoratin  | HSP90AB1 |
| 13965473 | Odoratin  | HSP90B1  |
| 13965473 | Odoratin  | HTR2A    |
| 13965473 | Odoratin  | HTR2C    |
| 13965473 | Odoratin  | IGFBP1   |
| 13965473 | Odoratin  | IGFBP2   |
| 13965473 | Odoratin  | IGFBP3   |
| 13965473 | Odoratin  | IGFBP4   |
| 13965473 | Odoratin  | IGFBP5   |
| 13965473 | Odoratin  | IGFBP6   |
| 13965473 | Odoratin  | IL2      |
| 13965473 | Odoratin  | KIT      |
| 13965473 | Odoratin  | MAOA     |
| 13965473 | Odoratin  | MAOB     |
| 13965473 | Odoratin  | MGAM     |
| 13965473 | Odoratin  | MIF      |
| 13965473 | Odoratin  | NOX4     |
| 13965473 | Odoratin  | OPRD1    |
| 13965473 | Odoratin  | PDE10A   |
| 13965473 | Odoratin  | PFKFB3   |
| 13965473 | Odoratin  | PLAU     |
| 13965473 | Odoratin  | PON1     |
| 13965473 | Odoratin  | PPARA    |
| 13965473 | Odoratin  | PTGS1    |
| 13965473 | Odoratin  | PTPN1    |
| 13965473 | Odoratin  | PTPRS    |
| 13965473 | Odoratin  | SLC6A2   |
| 13965473 | Odoratin  | STS      |
| 13965473 | Odoratin  | TBXAS1   |
| 13965473 | Odoratin  | TLR9     |
| 13965473 | Odoratin  | TNNT2    |
| 13965473 | Odoratin  | TYR      |
| 13965473 | Odoratin  | WEE1     |
| 13965473 | Odoratin  | XDH      |
| 14769500 | Xambioona | CTSK     |
| 14769500 | Xambioona | ODC1     |

|        |                               |          |
|--------|-------------------------------|----------|
| 354368 | 7-Methoxy-2-methyl isoflavone | ABAT     |
| 354368 | 7-Methoxy-2-methyl isoflavone | ABCB1    |
| 354368 | 7-Methoxy-2-methyl isoflavone | ABCG2    |
| 354368 | 7-Methoxy-2-methyl isoflavone | ACHE     |
| 354368 | 7-Methoxy-2-methyl isoflavone | ADORA1   |
| 354368 | 7-Methoxy-2-methyl isoflavone | ADORA2A  |
| 354368 | 7-Methoxy-2-methyl isoflavone | ALDH2    |
| 354368 | 7-Methoxy-2-methyl isoflavone | ALOX12   |
| 354368 | 7-Methoxy-2-methyl isoflavone | ALOX5    |
| 354368 | 7-Methoxy-2-methyl isoflavone | APH1A    |
| 354368 | 7-Methoxy-2-methyl isoflavone | APH1B    |
| 354368 | 7-Methoxy-2-methyl isoflavone | AURKA    |
| 354368 | 7-Methoxy-2-methyl isoflavone | CA1      |
| 354368 | 7-Methoxy-2-methyl isoflavone | CA12     |
| 354368 | 7-Methoxy-2-methyl isoflavone | CA2      |
| 354368 | 7-Methoxy-2-methyl isoflavone | CA4      |
| 354368 | 7-Methoxy-2-methyl isoflavone | CA7      |
| 354368 | 7-Methoxy-2-methyl isoflavone | CACNA2D1 |
| 354368 | 7-Methoxy-2-methyl isoflavone | CBR1     |
| 354368 | 7-Methoxy-2-methyl isoflavone | CHRNA7   |
| 354368 | 7-Methoxy-2-methyl isoflavone | CRHR1    |
| 354368 | 7-Methoxy-2-methyl isoflavone | CXCR2    |
| 354368 | 7-Methoxy-2-methyl isoflavone | CYP17A1  |
| 354368 | 7-Methoxy-2-methyl isoflavone | CYP19A1  |
| 354368 | 7-Methoxy-2-methyl isoflavone | CYP1B1   |
| 354368 | 7-Methoxy-2-methyl isoflavone | CYP27A1  |
| 354368 | 7-Methoxy-2-methyl isoflavone | EGFR     |
| 354368 | 7-Methoxy-2-methyl isoflavone | ESR1     |
| 354368 | 7-Methoxy-2-methyl isoflavone | ESR2     |
| 354368 | 7-Methoxy-2-methyl isoflavone | ESRRA    |
| 354368 | 7-Methoxy-2-methyl isoflavone | ESRRB    |
| 354368 | 7-Methoxy-2-methyl isoflavone | FLT1     |
| 354368 | 7-Methoxy-2-methyl isoflavone | FLT3     |
| 354368 | 7-Methoxy-2-methyl isoflavone | FNTA     |
| 354368 | 7-Methoxy-2-methyl isoflavone | FNTA     |
| 354368 | 7-Methoxy-2-methyl isoflavone | FNTB     |
| 354368 | 7-Methoxy-2-methyl isoflavone | FPR2     |
| 354368 | 7-Methoxy-2-methyl isoflavone | GPBAR1   |
| 354368 | 7-Methoxy-2-methyl isoflavone | GRM1     |
| 354368 | 7-Methoxy-2-methyl isoflavone | GRM2     |
| 354368 | 7-Methoxy-2-methyl isoflavone | GRM5     |
| 354368 | 7-Methoxy-2-methyl isoflavone | HCRTR1   |
| 354368 | 7-Methoxy-2-methyl isoflavone | HCRTR2   |
| 354368 | 7-Methoxy-2-methyl isoflavone | HDAC1    |

|        |                               |         |
|--------|-------------------------------|---------|
| 354368 | 7-Methoxy-2-methyl isoflavone | HDAC6   |
| 354368 | 7-Methoxy-2-methyl isoflavone | HSD17B1 |
| 354368 | 7-Methoxy-2-methyl isoflavone | HSD17B2 |
| 354368 | 7-Methoxy-2-methyl isoflavone | HTR2A   |
| 354368 | 7-Methoxy-2-methyl isoflavone | HTR2C   |
| 354368 | 7-Methoxy-2-methyl isoflavone | HTR7    |
| 354368 | 7-Methoxy-2-methyl isoflavone | IDO1    |
| 354368 | 7-Methoxy-2-methyl isoflavone | IL2     |
| 354368 | 7-Methoxy-2-methyl isoflavone | JAK2    |
| 354368 | 7-Methoxy-2-methyl isoflavone | JAK3    |
| 354368 | 7-Methoxy-2-methyl isoflavone | KCNA5   |
| 354368 | 7-Methoxy-2-methyl isoflavone | KDM1A   |
| 354368 | 7-Methoxy-2-methyl isoflavone | LRRK2   |
| 354368 | 7-Methoxy-2-methyl isoflavone | MAOA    |
| 354368 | 7-Methoxy-2-methyl isoflavone | MAOB    |
| 354368 | 7-Methoxy-2-methyl isoflavone | MCL1    |
| 354368 | 7-Methoxy-2-methyl isoflavone | MGAM    |
| 354368 | 7-Methoxy-2-methyl isoflavone | MGLL    |
| 354368 | 7-Methoxy-2-methyl isoflavone | MMP1    |
| 354368 | 7-Methoxy-2-methyl isoflavone | MTNR1A  |
| 354368 | 7-Methoxy-2-methyl isoflavone | MTNR1B  |
| 354368 | 7-Methoxy-2-methyl isoflavone | NAAA    |
| 354368 | 7-Methoxy-2-methyl isoflavone | NCSTN   |
| 354368 | 7-Methoxy-2-methyl isoflavone | NR3C1   |
| 354368 | 7-Methoxy-2-methyl isoflavone | NR3C2   |
| 354368 | 7-Methoxy-2-methyl isoflavone | NTRK1   |
| 354368 | 7-Methoxy-2-methyl isoflavone | P2RX7   |
| 354368 | 7-Methoxy-2-methyl isoflavone | PARP2   |
| 354368 | 7-Methoxy-2-methyl isoflavone | PDE10A  |
| 354368 | 7-Methoxy-2-methyl isoflavone | PDE1B   |
| 354368 | 7-Methoxy-2-methyl isoflavone | PDE4A   |
| 354368 | 7-Methoxy-2-methyl isoflavone | PDE4C   |
| 354368 | 7-Methoxy-2-methyl isoflavone | PDE7A   |
| 354368 | 7-Methoxy-2-methyl isoflavone | PDGFRA  |
| 354368 | 7-Methoxy-2-methyl isoflavone | PDGFRB  |
| 354368 | 7-Methoxy-2-methyl isoflavone | PFKFB3  |
| 354368 | 7-Methoxy-2-methyl isoflavone | PGGT1B  |
| 354368 | 7-Methoxy-2-methyl isoflavone | PGK1    |
| 354368 | 7-Methoxy-2-methyl isoflavone | PGR     |
| 354368 | 7-Methoxy-2-methyl isoflavone | PIK3CA  |
| 354368 | 7-Methoxy-2-methyl isoflavone | PON1    |
| 354368 | 7-Methoxy-2-methyl isoflavone | PPARG   |
| 354368 | 7-Methoxy-2-methyl isoflavone | PRKCA   |
| 354368 | 7-Methoxy-2-methyl isoflavone | PRKCG   |

|         |                               |         |
|---------|-------------------------------|---------|
| 354368  | 7-Methoxy-2-methyl isoflavone | PSEN1   |
| 354368  | 7-Methoxy-2-methyl isoflavone | PSEN2   |
| 354368  | 7-Methoxy-2-methyl isoflavone | PSENEN  |
| 354368  | 7-Methoxy-2-methyl isoflavone | PTGS1   |
| 354368  | 7-Methoxy-2-methyl isoflavone | PTPRS   |
| 354368  | 7-Methoxy-2-methyl isoflavone | QPCT    |
| 354368  | 7-Methoxy-2-methyl isoflavone | ROCK2   |
| 354368  | 7-Methoxy-2-methyl isoflavone | RPS6KB1 |
| 354368  | 7-Methoxy-2-methyl isoflavone | SIRT2   |
| 354368  | 7-Methoxy-2-methyl isoflavone | SIRT3   |
| 354368  | 7-Methoxy-2-methyl isoflavone | SLC5A7  |
| 354368  | 7-Methoxy-2-methyl isoflavone | SLC6A2  |
| 354368  | 7-Methoxy-2-methyl isoflavone | TACR1   |
| 354368  | 7-Methoxy-2-methyl isoflavone | TBXAS1  |
| 354368  | 7-Methoxy-2-methyl isoflavone | TGFBR1  |
| 354368  | 7-Methoxy-2-methyl isoflavone | TGM2    |
| 354368  | 7-Methoxy-2-methyl isoflavone | TNKS    |
| 354368  | 7-Methoxy-2-methyl isoflavone | TRPM8   |
| 354368  | 7-Methoxy-2-methyl isoflavone | TYR     |
| 354368  | 7-Methoxy-2-methyl isoflavone | UTS2R   |
| 5280378 | formononetin                  | ABCB1   |
| 5280378 | formononetin                  | ABCG2   |
| 5280378 | formononetin                  | ACHE    |
| 5280378 | formononetin                  | ADORA1  |
| 5280378 | formononetin                  | ADORA2A |
| 5280378 | formononetin                  | ALDH2   |
| 5280378 | formononetin                  | ALOX12  |
| 5280378 | formononetin                  | ALOX15  |
| 5280378 | formononetin                  | BACE1   |
| 5280378 | formononetin                  | CA1     |
| 5280378 | formononetin                  | CA12    |
| 5280378 | formononetin                  | CA13    |
| 5280378 | formononetin                  | CA14    |
| 5280378 | formononetin                  | CA2     |
| 5280378 | formononetin                  | CA3     |
| 5280378 | formononetin                  | CA4     |
| 5280378 | formononetin                  | CA5A    |
| 5280378 | formononetin                  | CA5B    |
| 5280378 | formononetin                  | CA6     |
| 5280378 | formononetin                  | CA7     |
| 5280378 | formononetin                  | CA9     |
| 5280378 | formononetin                  | CBR1    |
| 5280378 | formononetin                  | CYP19A1 |
| 5280378 | formononetin                  | DHODH   |

|         |              |         |
|---------|--------------|---------|
| 5280378 | formononetin | EGFR    |
| 5280378 | formononetin | ERCC5   |
| 5280378 | formononetin | ESR1    |
| 5280378 | formononetin | ESR2    |
| 5280378 | formononetin | ESRRA   |
| 5280378 | formononetin | ESRRB   |
| 5280378 | formononetin | FEN1    |
| 5280378 | formononetin | HSD17B1 |
| 5280378 | formononetin | HSD17B2 |
| 5280378 | formononetin | HTR2A   |
| 5280378 | formononetin | HTR2C   |
| 5280378 | formononetin | IL2     |
| 5280378 | formononetin | MAOA    |
| 5280378 | formononetin | MAOB    |
| 5280378 | formononetin | MGAM    |
| 5280378 | formononetin | MIF     |
| 5280378 | formononetin | NOX4    |
| 5280378 | formononetin | PFKFB3  |
| 5280378 | formononetin | PON1    |
| 5280378 | formononetin | PPARA   |
| 5280378 | formononetin | PTGS1   |
| 5280378 | formononetin | PTPN1   |
| 5280378 | formononetin | PTPRS   |
| 5280378 | formononetin | RAF1    |
| 5280378 | formononetin | SLC6A2  |
| 5280378 | formononetin | STS     |
| 5280378 | formononetin | TBXAS1  |
| 5280378 | formononetin | TLR9    |
| 5280378 | formononetin | TNKS    |
| 5280378 | formononetin | TNKS2   |
| 5280378 | formononetin | TYR     |
| 5280378 | formononetin | XDH     |
| 323     | Coumarin     | ACHE    |
| 323     | Coumarin     | CA1     |
| 323     | Coumarin     | CA12    |
| 323     | Coumarin     | CA13    |
| 323     | Coumarin     | CA14    |
| 323     | Coumarin     | CA2     |
| 323     | Coumarin     | CA3     |
| 323     | Coumarin     | CA4     |
| 323     | Coumarin     | CA5A    |
| 323     | Coumarin     | CA5B    |
| 323     | Coumarin     | CA6     |
| 323     | Coumarin     | CA7     |



|          |                    |         |
|----------|--------------------|---------|
| 323      | Coumarin           | CA9     |
| 323      | Coumarin           | DAO     |
| 323      | Coumarin           | EGFR    |
| 323      | Coumarin           | MAOA    |
| 323      | Coumarin           | NFKB1   |
| 323      | Coumarin           | NQO1    |
| 323      | Coumarin           | XDH     |
| 11604108 | (-)-Syringaresinol | ABCG2   |
| 11604108 | (-)-Syringaresinol | ABL1    |
| 11604108 | (-)-Syringaresinol | ADAM33  |
| 11604108 | (-)-Syringaresinol | ADRA2A  |
| 11604108 | (-)-Syringaresinol | ALOX12  |
| 11604108 | (-)-Syringaresinol | ALOX5   |
| 11604108 | (-)-Syringaresinol | BDKRB1  |
| 11604108 | (-)-Syringaresinol | BMP1    |
| 11604108 | (-)-Syringaresinol | CASP1   |
| 11604108 | (-)-Syringaresinol | CCKAR   |
| 11604108 | (-)-Syringaresinol | CCKBR   |
| 11604108 | (-)-Syringaresinol | CCNB3   |
| 11604108 | (-)-Syringaresinol | CCR4    |
| 11604108 | (-)-Syringaresinol | CDK1    |
| 11604108 | (-)-Syringaresinol | CDK2    |
| 11604108 | (-)-Syringaresinol | CHEK1   |
| 11604108 | (-)-Syringaresinol | CSF1R   |
| 11604108 | (-)-Syringaresinol | CXCR1   |
| 11604108 | (-)-Syringaresinol | CXCR2   |
| 11604108 | (-)-Syringaresinol | EIF2AK3 |
| 11604108 | (-)-Syringaresinol | FCER2   |
| 11604108 | (-)-Syringaresinol | GSK3B   |
| 11604108 | (-)-Syringaresinol | HCK     |
| 11604108 | (-)-Syringaresinol | HIF1A   |
| 11604108 | (-)-Syringaresinol | IMPDH2  |
| 11604108 | (-)-Syringaresinol | JAK3    |
| 11604108 | (-)-Syringaresinol | LRRK2   |
| 11604108 | (-)-Syringaresinol | MAP3K12 |
| 11604108 | (-)-Syringaresinol | MAPK9   |
| 11604108 | (-)-Syringaresinol | MCL1    |
| 11604108 | (-)-Syringaresinol | MMP1    |
| 11604108 | (-)-Syringaresinol | MMP7    |
| 11604108 | (-)-Syringaresinol | MMP8    |
| 11604108 | (-)-Syringaresinol | MPI     |
| 11604108 | (-)-Syringaresinol | MTOR    |
| 11604108 | (-)-Syringaresinol | OPRM1   |
| 11604108 | (-)-Syringaresinol | P2RX3   |

|          |                                                          |         |
|----------|----------------------------------------------------------|---------|
| 11604108 | (-)-Syringaresinol                                       | PDK1    |
| 11604108 | (-)-Syringaresinol                                       | PI4KB   |
| 11604108 | (-)-Syringaresinol                                       | PIK3CA  |
| 11604108 | (-)-Syringaresinol                                       | PIK3CB  |
| 11604108 | (-)-Syringaresinol                                       | PIK3CD  |
| 11604108 | (-)-Syringaresinol                                       | PIK3CG  |
| 11604108 | (-)-Syringaresinol                                       | PLA2G7  |
| 11604108 | (-)-Syringaresinol                                       | PRKDC   |
| 11604108 | (-)-Syringaresinol                                       | PTAFR   |
| 11604108 | (-)-Syringaresinol                                       | RPS6KA3 |
| 11604108 | (-)-Syringaresinol                                       | SHBG    |
| 11604108 | (-)-Syringaresinol                                       | SLC5A2  |
| 11604108 | (-)-Syringaresinol                                       | SLC6A2  |
| 11604108 | (-)-Syringaresinol                                       | SLC6A4  |
| 11604108 | (-)-Syringaresinol                                       | SOAT1   |
| 11604108 | (-)-Syringaresinol                                       | SOAT2   |
| 11604108 | (-)-Syringaresinol                                       | SYK     |
| 11604108 | (-)-Syringaresinol                                       | TOP1    |
| 11604108 | (-)-Syringaresinol                                       | WEE1    |
| 614467   | 5-(2-Methyl-1,3-thiazol-4-yl)thiophene-2-carboxylic acid | AKR1B1  |
| 614467   | 5-(2-Methyl-1,3-thiazol-4-yl)thiophene-2-carboxylic acid | APEX1   |
| 614467   | 5-(2-Methyl-1,3-thiazol-4-yl)thiophene-2-carboxylic acid | CA1     |
| 614467   | 5-(2-Methyl-1,3-thiazol-4-yl)thiophene-2-carboxylic acid | CA12    |
| 614467   | 5-(2-Methyl-1,3-thiazol-4-yl)thiophene-2-carboxylic acid | CA13    |
| 614467   | 5-(2-Methyl-1,3-thiazol-4-yl)thiophene-2-carboxylic acid | CA14    |
| 614467   | 5-(2-Methyl-1,3-thiazol-4-yl)thiophene-2-carboxylic acid | CA3     |
| 614467   | 5-(2-Methyl-1,3-thiazol-4-yl)thiophene-2-carboxylic acid | CA5A    |
| 614467   | 5-(2-Methyl-1,3-thiazol-4-yl)thiophene-2-carboxylic acid | CA5B    |
| 614467   | 5-(2-Methyl-1,3-thiazol-4-yl)thiophene-2-carboxylic acid | CA9     |
| 614467   | 5-(2-Methyl-1,3-thiazol-4-yl)thiophene-2-carboxylic acid | CCNC    |
| 614467   | 5-(2-Methyl-1,3-thiazol-4-yl)thiophene-2-carboxylic acid | CHRNA4  |

|        |                                                          |         |
|--------|----------------------------------------------------------|---------|
| 614467 | 5-(2-Methyl-1,3-thiazol-4-yl)thiophene-2-carboxylic acid | CSNK2A1 |
| 614467 | 5-(2-Methyl-1,3-thiazol-4-yl)thiophene-2-carboxylic acid | ERCC5   |
| 614467 | 5-(2-Methyl-1,3-thiazol-4-yl)thiophene-2-carboxylic acid | ESR2    |
| 614467 | 5-(2-Methyl-1,3-thiazol-4-yl)thiophene-2-carboxylic acid | FEN1    |
| 614467 | 5-(2-Methyl-1,3-thiazol-4-yl)thiophene-2-carboxylic acid | GRK2    |
| 614467 | 5-(2-Methyl-1,3-thiazol-4-yl)thiophene-2-carboxylic acid | HCAR2   |
| 614467 | 5-(2-Methyl-1,3-thiazol-4-yl)thiophene-2-carboxylic acid | ITGAL   |
| 614467 | 5-(2-Methyl-1,3-thiazol-4-yl)thiophene-2-carboxylic acid | KDM2A   |
| 614467 | 5-(2-Methyl-1,3-thiazol-4-yl)thiophene-2-carboxylic acid | KDM3A   |
| 614467 | 5-(2-Methyl-1,3-thiazol-4-yl)thiophene-2-carboxylic acid | KDM4A   |
| 614467 | 5-(2-Methyl-1,3-thiazol-4-yl)thiophene-2-carboxylic acid | KDM4B   |
| 614467 | 5-(2-Methyl-1,3-thiazol-4-yl)thiophene-2-carboxylic acid | KDM4C   |
| 614467 | 5-(2-Methyl-1,3-thiazol-4-yl)thiophene-2-carboxylic acid | KDM4D   |
| 614467 | 5-(2-Methyl-1,3-thiazol-4-yl)thiophene-2-carboxylic acid | KDM4E   |
| 614467 | 5-(2-Methyl-1,3-thiazol-4-yl)thiophene-2-carboxylic acid | KDM5B   |
| 614467 | 5-(2-Methyl-1,3-thiazol-4-yl)thiophene-2-carboxylic acid | KDM5C   |
| 614467 | 5-(2-Methyl-1,3-thiazol-4-yl)thiophene-2-carboxylic acid | KDM6B   |
| 614467 | 5-(2-Methyl-1,3-thiazol-4-yl)thiophene-2-carboxylic acid | KMO     |
| 614467 | 5-(2-Methyl-1,3-thiazol-4-yl)thiophene-2-carboxylic acid | MAP3K8  |
| 614467 | 5-(2-Methyl-1,3-thiazol-4-yl)thiophene-2-carboxylic acid | NOTUM   |
| 614467 | 5-(2-Methyl-1,3-thiazol-4-yl)thiophene-2-carboxylic acid | PAM     |
| 614467 | 5-(2-Methyl-1,3-thiazol-4-yl)thiophene-2-carboxylic acid | PARP1   |

|           |                                                                                  |         |
|-----------|----------------------------------------------------------------------------------|---------|
| 614467    | 5-(2-Methyl-1,3-thiazol-4-yl)thiophene-2-carboxylic acid                         | PIM1    |
| 614467    | 5-(2-Methyl-1,3-thiazol-4-yl)thiophene-2-carboxylic acid                         | SLC16A1 |
| 614467    | 5-(2-Methyl-1,3-thiazol-4-yl)thiophene-2-carboxylic acid                         | SLC16A3 |
| 614467    | 5-(2-Methyl-1,3-thiazol-4-yl)thiophene-2-carboxylic acid                         | SLCO1B1 |
| 614467    | 5-(2-Methyl-1,3-thiazol-4-yl)thiophene-2-carboxylic acid                         | SORT1   |
| 614467    | 5-(2-Methyl-1,3-thiazol-4-yl)thiophene-2-carboxylic acid                         | TAS1R3  |
| 614467    | 5-(2-Methyl-1,3-thiazol-4-yl)thiophene-2-carboxylic acid                         | TBXAS1  |
| 2794766   | 2-[4-(Trifluoromethyl)phenyl]-1,3-thiazole-4-carboxylic Acid                     | HTR2B   |
| 2794766   | 2-[4-(Trifluoromethyl)phenyl]-1,3-thiazole-4-carboxylic Acid                     | KMO     |
| 2794766   | 2-[4-(Trifluoromethyl)phenyl]-1,3-thiazole-4-carboxylic Acid                     | PTPN1   |
| 135567045 | 2-(4-((Pyridin-4-Yl)methyl)piperazin-1-Yl)-3,4,5,6,7,8-Hexahydroquinazolin-4-One | ABL1    |
| 135567045 | 2-(4-((Pyridin-4-Yl)methyl)piperazin-1-Yl)-3,4,5,6,7,8-Hexahydroquinazolin-4-One | ACACA   |
| 135567045 | 2-(4-((Pyridin-4-Yl)methyl)piperazin-1-Yl)-3,4,5,6,7,8-Hexahydroquinazolin-4-One | ACACB   |
| 135567045 | 2-(4-((Pyridin-4-Yl)methyl)piperazin-1-Yl)-3,4,5,6,7,8-Hexahydroquinazolin-4-One | ADAM17  |
| 135567045 | 2-(4-((Pyridin-4-Yl)methyl)piperazin-1-Yl)-3,4,5,6,7,8-Hexahydroquinazolin-4-One | ADRA1A  |
| 135567045 | 2-(4-((Pyridin-4-Yl)methyl)piperazin-1-Yl)-3,4,5,6,7,8-Hexahydroquinazolin-4-One | ADRA1D  |

|           |                                                                                              |        |
|-----------|----------------------------------------------------------------------------------------------|--------|
| 135567045 | 2-(4-((Pyridin-4-<br>Yl)methyl)piperazin-1-Yl)-<br>3,4,5,6,7,8-<br>Hexahydroquinazolin-4-One | ALK    |
| 135567045 | 2-(4-((Pyridin-4-<br>Yl)methyl)piperazin-1-Yl)-<br>3,4,5,6,7,8-<br>Hexahydroquinazolin-4-One | ASAH1  |
| 135567045 | 2-(4-((Pyridin-4-<br>Yl)methyl)piperazin-1-Yl)-<br>3,4,5,6,7,8-<br>Hexahydroquinazolin-4-One | AURKA  |
| 135567045 | 2-(4-((Pyridin-4-<br>Yl)methyl)piperazin-1-Yl)-<br>3,4,5,6,7,8-<br>Hexahydroquinazolin-4-One | BRD4   |
| 135567045 | 2-(4-((Pyridin-4-<br>Yl)methyl)piperazin-1-Yl)-<br>3,4,5,6,7,8-<br>Hexahydroquinazolin-4-One | CALCRL |
| 135567045 | 2-(4-((Pyridin-4-<br>Yl)methyl)piperazin-1-Yl)-<br>3,4,5,6,7,8-<br>Hexahydroquinazolin-4-One | CDC7   |
| 135567045 | 2-(4-((Pyridin-4-<br>Yl)methyl)piperazin-1-Yl)-<br>3,4,5,6,7,8-<br>Hexahydroquinazolin-4-One | CDK1   |
| 135567045 | 2-(4-((Pyridin-4-<br>Yl)methyl)piperazin-1-Yl)-<br>3,4,5,6,7,8-<br>Hexahydroquinazolin-4-One | CDK1   |
| 135567045 | 2-(4-((Pyridin-4-<br>Yl)methyl)piperazin-1-Yl)-<br>3,4,5,6,7,8-<br>Hexahydroquinazolin-4-One | CDK2   |
| 135567045 | 2-(4-((Pyridin-4-<br>Yl)methyl)piperazin-1-Yl)-<br>3,4,5,6,7,8-<br>Hexahydroquinazolin-4-One | CDK2   |
| 135567045 | 2-(4-((Pyridin-4-<br>Yl)methyl)piperazin-1-Yl)-<br>3,4,5,6,7,8-<br>Hexahydroquinazolin-4-One | CDK9   |

|           |                                                                                              |         |
|-----------|----------------------------------------------------------------------------------------------|---------|
| 135567045 | 2-(4-((Pyridin-4-<br>Yl)methyl)piperazin-1-Yl)-<br>3,4,5,6,7,8-<br>Hexahydroquinazolin-4-One | CFTR    |
| 135567045 | 2-(4-((Pyridin-4-<br>Yl)methyl)piperazin-1-Yl)-<br>3,4,5,6,7,8-<br>Hexahydroquinazolin-4-One | CLK4    |
| 135567045 | 2-(4-((Pyridin-4-<br>Yl)methyl)piperazin-1-Yl)-<br>3,4,5,6,7,8-<br>Hexahydroquinazolin-4-One | CNR1    |
| 135567045 | 2-(4-((Pyridin-4-<br>Yl)methyl)piperazin-1-Yl)-<br>3,4,5,6,7,8-<br>Hexahydroquinazolin-4-One | CNR2    |
| 135567045 | 2-(4-((Pyridin-4-<br>Yl)methyl)piperazin-1-Yl)-<br>3,4,5,6,7,8-<br>Hexahydroquinazolin-4-One | CTSK    |
| 135567045 | 2-(4-((Pyridin-4-<br>Yl)methyl)piperazin-1-Yl)-<br>3,4,5,6,7,8-<br>Hexahydroquinazolin-4-One | CTSL    |
| 135567045 | 2-(4-((Pyridin-4-<br>Yl)methyl)piperazin-1-Yl)-<br>3,4,5,6,7,8-<br>Hexahydroquinazolin-4-One | CTSS    |
| 135567045 | 2-(4-((Pyridin-4-<br>Yl)methyl)piperazin-1-Yl)-<br>3,4,5,6,7,8-<br>Hexahydroquinazolin-4-One | CTSV    |
| 135567045 | 2-(4-((Pyridin-4-<br>Yl)methyl)piperazin-1-Yl)-<br>3,4,5,6,7,8-<br>Hexahydroquinazolin-4-One | CYP19A1 |
| 135567045 | 2-(4-((Pyridin-4-<br>Yl)methyl)piperazin-1-Yl)-<br>3,4,5,6,7,8-<br>Hexahydroquinazolin-4-One | DGAT1   |
| 135567045 | 2-(4-((Pyridin-4-<br>Yl)methyl)piperazin-1-Yl)-<br>3,4,5,6,7,8-<br>Hexahydroquinazolin-4-One | DRD4    |

|           |                                                                                  |        |
|-----------|----------------------------------------------------------------------------------|--------|
| 135567045 | 2-(4-((Pyridin-4-Yl)methyl)piperazin-1-Yl)-3,4,5,6,7,8-Hexahydroquinazolin-4-One | ELANE  |
| 135567045 | 2-(4-((Pyridin-4-Yl)methyl)piperazin-1-Yl)-3,4,5,6,7,8-Hexahydroquinazolin-4-One | EPHX2  |
| 135567045 | 2-(4-((Pyridin-4-Yl)methyl)piperazin-1-Yl)-3,4,5,6,7,8-Hexahydroquinazolin-4-One | EZR    |
| 135567045 | 2-(4-((Pyridin-4-Yl)methyl)piperazin-1-Yl)-3,4,5,6,7,8-Hexahydroquinazolin-4-One | F10    |
| 135567045 | 2-(4-((Pyridin-4-Yl)methyl)piperazin-1-Yl)-3,4,5,6,7,8-Hexahydroquinazolin-4-One | F13A1  |
| 135567045 | 2-(4-((Pyridin-4-Yl)methyl)piperazin-1-Yl)-3,4,5,6,7,8-Hexahydroquinazolin-4-One | F2     |
| 135567045 | 2-(4-((Pyridin-4-Yl)methyl)piperazin-1-Yl)-3,4,5,6,7,8-Hexahydroquinazolin-4-One | FAAH   |
| 135567045 | 2-(4-((Pyridin-4-Yl)methyl)piperazin-1-Yl)-3,4,5,6,7,8-Hexahydroquinazolin-4-One | FASN   |
| 135567045 | 2-(4-((Pyridin-4-Yl)methyl)piperazin-1-Yl)-3,4,5,6,7,8-Hexahydroquinazolin-4-One | FLT1   |
| 135567045 | 2-(4-((Pyridin-4-Yl)methyl)piperazin-1-Yl)-3,4,5,6,7,8-Hexahydroquinazolin-4-One | GHSR   |
| 135567045 | 2-(4-((Pyridin-4-Yl)methyl)piperazin-1-Yl)-3,4,5,6,7,8-Hexahydroquinazolin-4-One | GPBAR1 |

|           |                                                                                  |        |
|-----------|----------------------------------------------------------------------------------|--------|
| 135567045 | 2-(4-((Pyridin-4-Yl)methyl)piperazin-1-Yl)-3,4,5,6,7,8-Hexahydroquinazolin-4-One | GRM1   |
| 135567045 | 2-(4-((Pyridin-4-Yl)methyl)piperazin-1-Yl)-3,4,5,6,7,8-Hexahydroquinazolin-4-One | GSK3A  |
| 135567045 | 2-(4-((Pyridin-4-Yl)methyl)piperazin-1-Yl)-3,4,5,6,7,8-Hexahydroquinazolin-4-One | GSK3B  |
| 135567045 | 2-(4-((Pyridin-4-Yl)methyl)piperazin-1-Yl)-3,4,5,6,7,8-Hexahydroquinazolin-4-One | HDAC1  |
| 135567045 | 2-(4-((Pyridin-4-Yl)methyl)piperazin-1-Yl)-3,4,5,6,7,8-Hexahydroquinazolin-4-One | HDAC10 |
| 135567045 | 2-(4-((Pyridin-4-Yl)methyl)piperazin-1-Yl)-3,4,5,6,7,8-Hexahydroquinazolin-4-One | HDAC11 |
| 135567045 | 2-(4-((Pyridin-4-Yl)methyl)piperazin-1-Yl)-3,4,5,6,7,8-Hexahydroquinazolin-4-One | HDAC2  |
| 135567045 | 2-(4-((Pyridin-4-Yl)methyl)piperazin-1-Yl)-3,4,5,6,7,8-Hexahydroquinazolin-4-One | HDAC3  |
| 135567045 | 2-(4-((Pyridin-4-Yl)methyl)piperazin-1-Yl)-3,4,5,6,7,8-Hexahydroquinazolin-4-One | HDAC6  |
| 135567045 | 2-(4-((Pyridin-4-Yl)methyl)piperazin-1-Yl)-3,4,5,6,7,8-Hexahydroquinazolin-4-One | HDAC8  |
| 135567045 | 2-(4-((Pyridin-4-Yl)methyl)piperazin-1-Yl)-3,4,5,6,7,8-Hexahydroquinazolin-4-One | IMPDH2 |



|           |                                                                                              |          |
|-----------|----------------------------------------------------------------------------------------------|----------|
| 135567045 | 2-(4-((Pyridin-4-<br>Yl)methyl)piperazin-1-Yl)-<br>3,4,5,6,7,8-<br>Hexahydroquinazolin-4-One | ITK      |
| 135567045 | 2-(4-((Pyridin-4-<br>Yl)methyl)piperazin-1-Yl)-<br>3,4,5,6,7,8-<br>Hexahydroquinazolin-4-One | KDR      |
| 135567045 | 2-(4-((Pyridin-4-<br>Yl)methyl)piperazin-1-Yl)-<br>3,4,5,6,7,8-<br>Hexahydroquinazolin-4-One | LCK      |
| 135567045 | 2-(4-((Pyridin-4-<br>Yl)methyl)piperazin-1-Yl)-<br>3,4,5,6,7,8-<br>Hexahydroquinazolin-4-One | LRRK2    |
| 135567045 | 2-(4-((Pyridin-4-<br>Yl)methyl)piperazin-1-Yl)-<br>3,4,5,6,7,8-<br>Hexahydroquinazolin-4-One | MAPK1    |
| 135567045 | 2-(4-((Pyridin-4-<br>Yl)methyl)piperazin-1-Yl)-<br>3,4,5,6,7,8-<br>Hexahydroquinazolin-4-One | MAPK10   |
| 135567045 | 2-(4-((Pyridin-4-<br>Yl)methyl)piperazin-1-Yl)-<br>3,4,5,6,7,8-<br>Hexahydroquinazolin-4-One | MAPK14   |
| 135567045 | 2-(4-((Pyridin-4-<br>Yl)methyl)piperazin-1-Yl)-<br>3,4,5,6,7,8-<br>Hexahydroquinazolin-4-One | MAPK8    |
| 135567045 | 2-(4-((Pyridin-4-<br>Yl)methyl)piperazin-1-Yl)-<br>3,4,5,6,7,8-<br>Hexahydroquinazolin-4-One | MAPK9    |
| 135567045 | 2-(4-((Pyridin-4-<br>Yl)methyl)piperazin-1-Yl)-<br>3,4,5,6,7,8-<br>Hexahydroquinazolin-4-One | MAPKAPK2 |
| 135567045 | 2-(4-((Pyridin-4-<br>Yl)methyl)piperazin-1-Yl)-<br>3,4,5,6,7,8-<br>Hexahydroquinazolin-4-One | MCHR1    |

|           |                                                                                  |        |
|-----------|----------------------------------------------------------------------------------|--------|
| 135567045 | 2-(4-((Pyridin-4-Yl)methyl)piperazin-1-Yl)-3,4,5,6,7,8-Hexahydroquinazolin-4-One | MET    |
| 135567045 | 2-(4-((Pyridin-4-Yl)methyl)piperazin-1-Yl)-3,4,5,6,7,8-Hexahydroquinazolin-4-One | MGLL   |
| 135567045 | 2-(4-((Pyridin-4-Yl)methyl)piperazin-1-Yl)-3,4,5,6,7,8-Hexahydroquinazolin-4-One | MMP1   |
| 135567045 | 2-(4-((Pyridin-4-Yl)methyl)piperazin-1-Yl)-3,4,5,6,7,8-Hexahydroquinazolin-4-One | MTNR1A |
| 135567045 | 2-(4-((Pyridin-4-Yl)methyl)piperazin-1-Yl)-3,4,5,6,7,8-Hexahydroquinazolin-4-One | MTNR1B |
| 135567045 | 2-(4-((Pyridin-4-Yl)methyl)piperazin-1-Yl)-3,4,5,6,7,8-Hexahydroquinazolin-4-One | NAMPT  |
| 135567045 | 2-(4-((Pyridin-4-Yl)methyl)piperazin-1-Yl)-3,4,5,6,7,8-Hexahydroquinazolin-4-One | NPY5R  |
| 135567045 | 2-(4-((Pyridin-4-Yl)methyl)piperazin-1-Yl)-3,4,5,6,7,8-Hexahydroquinazolin-4-One | NR4A2  |
| 135567045 | 2-(4-((Pyridin-4-Yl)methyl)piperazin-1-Yl)-3,4,5,6,7,8-Hexahydroquinazolin-4-One | P2RX7  |
| 135567045 | 2-(4-((Pyridin-4-Yl)methyl)piperazin-1-Yl)-3,4,5,6,7,8-Hexahydroquinazolin-4-One | PARP1  |
| 135567045 | 2-(4-((Pyridin-4-Yl)methyl)piperazin-1-Yl)-3,4,5,6,7,8-Hexahydroquinazolin-4-One | PARP10 |

|           |                                                                                              |        |
|-----------|----------------------------------------------------------------------------------------------|--------|
| 135567045 | 2-(4-((Pyridin-4-<br>Yl)methyl)piperazin-1-Yl)-<br>3,4,5,6,7,8-<br>Hexahydroquinazolin-4-One | PARP2  |
| 135567045 | 2-(4-((Pyridin-4-<br>Yl)methyl)piperazin-1-Yl)-<br>3,4,5,6,7,8-<br>Hexahydroquinazolin-4-One | PDE10A |
| 135567045 | 2-(4-((Pyridin-4-<br>Yl)methyl)piperazin-1-Yl)-<br>3,4,5,6,7,8-<br>Hexahydroquinazolin-4-One | PDE3A  |
| 135567045 | 2-(4-((Pyridin-4-<br>Yl)methyl)piperazin-1-Yl)-<br>3,4,5,6,7,8-<br>Hexahydroquinazolin-4-One | PDE3B  |
| 135567045 | 2-(4-((Pyridin-4-<br>Yl)methyl)piperazin-1-Yl)-<br>3,4,5,6,7,8-<br>Hexahydroquinazolin-4-One | PDE4B  |
| 135567045 | 2-(4-((Pyridin-4-<br>Yl)methyl)piperazin-1-Yl)-<br>3,4,5,6,7,8-<br>Hexahydroquinazolin-4-One | PDE7A  |
| 135567045 | 2-(4-((Pyridin-4-<br>Yl)methyl)piperazin-1-Yl)-<br>3,4,5,6,7,8-<br>Hexahydroquinazolin-4-One | PDGFRA |
| 135567045 | 2-(4-((Pyridin-4-<br>Yl)methyl)piperazin-1-Yl)-<br>3,4,5,6,7,8-<br>Hexahydroquinazolin-4-One | PLAU   |
| 135567045 | 2-(4-((Pyridin-4-<br>Yl)methyl)piperazin-1-Yl)-<br>3,4,5,6,7,8-<br>Hexahydroquinazolin-4-One | PTGS2  |
| 135567045 | 2-(4-((Pyridin-4-<br>Yl)methyl)piperazin-1-Yl)-<br>3,4,5,6,7,8-<br>Hexahydroquinazolin-4-One | RBBP9  |
| 135567045 | 2-(4-((Pyridin-4-<br>Yl)methyl)piperazin-1-Yl)-<br>3,4,5,6,7,8-<br>Hexahydroquinazolin-4-One | RET    |

|           |                                                                                              |          |
|-----------|----------------------------------------------------------------------------------------------|----------|
| 135567045 | 2-(4-((Pyridin-4-<br>Yl)methyl)piperazin-1-Yl)-<br>3,4,5,6,7,8-<br>Hexahydroquinazolin-4-One | ROCK2    |
| 135567045 | 2-(4-((Pyridin-4-<br>Yl)methyl)piperazin-1-Yl)-<br>3,4,5,6,7,8-<br>Hexahydroquinazolin-4-One | RORC     |
| 135567045 | 2-(4-((Pyridin-4-<br>Yl)methyl)piperazin-1-Yl)-<br>3,4,5,6,7,8-<br>Hexahydroquinazolin-4-One | RPS6KA2  |
| 135567045 | 2-(4-((Pyridin-4-<br>Yl)methyl)piperazin-1-Yl)-<br>3,4,5,6,7,8-<br>Hexahydroquinazolin-4-One | SCARB1   |
| 135567045 | 2-(4-((Pyridin-4-<br>Yl)methyl)piperazin-1-Yl)-<br>3,4,5,6,7,8-<br>Hexahydroquinazolin-4-One | SERPINE1 |
| 135567045 | 2-(4-((Pyridin-4-<br>Yl)methyl)piperazin-1-Yl)-<br>3,4,5,6,7,8-<br>Hexahydroquinazolin-4-One | SLC27A1  |
| 135567045 | 2-(4-((Pyridin-4-<br>Yl)methyl)piperazin-1-Yl)-<br>3,4,5,6,7,8-<br>Hexahydroquinazolin-4-One | SLC6A9   |
| 135567045 | 2-(4-((Pyridin-4-<br>Yl)methyl)piperazin-1-Yl)-<br>3,4,5,6,7,8-<br>Hexahydroquinazolin-4-One | SLC9A1   |
| 135567045 | 2-(4-((Pyridin-4-<br>Yl)methyl)piperazin-1-Yl)-<br>3,4,5,6,7,8-<br>Hexahydroquinazolin-4-One | SRC      |
| 135567045 | 2-(4-((Pyridin-4-<br>Yl)methyl)piperazin-1-Yl)-<br>3,4,5,6,7,8-<br>Hexahydroquinazolin-4-One | TEK      |
| 135567045 | 2-(4-((Pyridin-4-<br>Yl)methyl)piperazin-1-Yl)-<br>3,4,5,6,7,8-<br>Hexahydroquinazolin-4-One | TGM1     |

|           |                                                                                  |         |
|-----------|----------------------------------------------------------------------------------|---------|
| 135567045 | 2-(4-((Pyridin-4-Yl)methyl)piperazin-1-Yl)-3,4,5,6,7,8-Hexahydroquinazolin-4-One | TGM2    |
| 135567045 | 2-(4-((Pyridin-4-Yl)methyl)piperazin-1-Yl)-3,4,5,6,7,8-Hexahydroquinazolin-4-One | TNKS    |
| 135567045 | 2-(4-((Pyridin-4-Yl)methyl)piperazin-1-Yl)-3,4,5,6,7,8-Hexahydroquinazolin-4-One | TNKS2   |
| 135567045 | 2-(4-((Pyridin-4-Yl)methyl)piperazin-1-Yl)-3,4,5,6,7,8-Hexahydroquinazolin-4-One | TRPA1   |
| 135567045 | 2-(4-((Pyridin-4-Yl)methyl)piperazin-1-Yl)-3,4,5,6,7,8-Hexahydroquinazolin-4-One | TRPV1   |
| 135567045 | 2-(4-((Pyridin-4-Yl)methyl)piperazin-1-Yl)-3,4,5,6,7,8-Hexahydroquinazolin-4-One | TRPV4   |
| 21594250  | Macharinic acid lactone                                                          | ADORA2A |
| 21594250  | Macharinic acid lactone                                                          | AOC1    |
| 21594250  | Macharinic acid lactone                                                          | ASF1A   |
| 21594250  | Macharinic acid lactone                                                          | BACE2   |
| 21594250  | Macharinic acid lactone                                                          | BRAF    |
| 21594250  | Macharinic acid lactone                                                          | CASP6   |
| 21594250  | Macharinic acid lactone                                                          | CASR    |
| 21594250  | Macharinic acid lactone                                                          | CDC7    |
| 21594250  | Macharinic acid lactone                                                          | CDK1    |
| 21594250  | Macharinic acid lactone                                                          | CDK2    |
| 21594250  | Macharinic acid lactone                                                          | CDK5R1  |
| 21594250  | Macharinic acid lactone                                                          | CHEK1   |
| 21594250  | Macharinic acid lactone                                                          | CXCR2   |
| 21594250  | Macharinic acid lactone                                                          | CYP11B1 |
| 21594250  | Macharinic acid lactone                                                          | CYP11B2 |
| 21594250  | Macharinic acid lactone                                                          | DAO     |
| 21594250  | Macharinic acid lactone                                                          | DHFR    |
| 21594250  | Macharinic acid lactone                                                          | DRD4    |
| 21594250  | Macharinic acid lactone                                                          | EGLN1   |
| 21594250  | Macharinic acid lactone                                                          | ERN1    |

|          |                         |          |
|----------|-------------------------|----------|
| 21594250 | Macharinic acid lactone | FAP      |
| 21594250 | Macharinic acid lactone | FGFR1    |
| 21594250 | Macharinic acid lactone | FKBP1A   |
| 21594250 | Macharinic acid lactone | FLT3     |
| 21594250 | Macharinic acid lactone | FPR1     |
| 21594250 | Macharinic acid lactone | GABRA1   |
| 21594250 | Macharinic acid lactone | GABRA2   |
| 21594250 | Macharinic acid lactone | GABRA5   |
| 21594250 | Macharinic acid lactone | GABRB3   |
| 21594250 | Macharinic acid lactone | GABRB3   |
| 21594250 | Macharinic acid lactone | GABRB3   |
| 21594250 | Macharinic acid lactone | GCGR     |
| 21594250 | Macharinic acid lactone | GRK6     |
| 21594250 | Macharinic acid lactone | GSK3B    |
| 21594250 | Macharinic acid lactone | GSTA1    |
| 21594250 | Macharinic acid lactone | HCRTR1   |
| 21594250 | Macharinic acid lactone | HCRTR2   |
| 21594250 | Macharinic acid lactone | HDAC4    |
| 21594250 | Macharinic acid lactone | HDAC5    |
| 21594250 | Macharinic acid lactone | HDAC7    |
| 21594250 | Macharinic acid lactone | HSP90AA1 |
| 21594250 | Macharinic acid lactone | HTR1A    |
| 21594250 | Macharinic acid lactone | HTR6     |
| 21594250 | Macharinic acid lactone | HTR7     |
| 21594250 | Macharinic acid lactone | IMPDH1   |
| 21594250 | Macharinic acid lactone | IMPDH2   |
| 21594250 | Macharinic acid lactone | JAK2     |
| 21594250 | Macharinic acid lactone | JAK3     |
| 21594250 | Macharinic acid lactone | KCNMA1   |
| 21594250 | Macharinic acid lactone | KDM1A    |
| 21594250 | Macharinic acid lactone | KDR      |
| 21594250 | Macharinic acid lactone | KIF11    |
| 21594250 | Macharinic acid lactone | KMT5A    |
| 21594250 | Macharinic acid lactone | LDHA     |
| 21594250 | Macharinic acid lactone | LNPEP    |
| 21594250 | Macharinic acid lactone | MAOA     |
| 21594250 | Macharinic acid lactone | MAOB     |
| 21594250 | Macharinic acid lactone | MAPK8    |
| 21594250 | Macharinic acid lactone | MAPKAPK2 |
| 21594250 | Macharinic acid lactone | MIF      |
| 21594250 | Macharinic acid lactone | MMP1     |
| 21594250 | Macharinic acid lactone | MMP3     |
| 21594250 | Macharinic acid lactone | MMP7     |
| 21594250 | Macharinic acid lactone | MSR1     |

|          |                         |         |
|----------|-------------------------|---------|
| 21594250 | Macharinic acid lactone | MTNR1A  |
| 21594250 | Macharinic acid lactone | MTNR1B  |
| 21594250 | Macharinic acid lactone | MTOR    |
| 21594250 | Macharinic acid lactone | MYLK    |
| 21594250 | Macharinic acid lactone | NEK1    |
| 21594250 | Macharinic acid lactone | NOD1    |
| 21594250 | Macharinic acid lactone | NOD2    |
| 21594250 | Macharinic acid lactone | NOS1    |
| 21594250 | Macharinic acid lactone | NOS2    |
| 21594250 | Macharinic acid lactone | NOX4    |
| 21594250 | Macharinic acid lactone | NPY5R   |
| 21594250 | Macharinic acid lactone | NQO1    |
| 21594250 | Macharinic acid lactone | NQO2    |
| 21594250 | Macharinic acid lactone | P2RX3   |
| 21594250 | Macharinic acid lactone | PARP1   |
| 21594250 | Macharinic acid lactone | PDE10A  |
| 21594250 | Macharinic acid lactone | PDE2A   |
| 21594250 | Macharinic acid lactone | PDE4A   |
| 21594250 | Macharinic acid lactone | PDE4B   |
| 21594250 | Macharinic acid lactone | PDE4C   |
| 21594250 | Macharinic acid lactone | PDGFRA  |
| 21594250 | Macharinic acid lactone | PDPK1   |
| 21594250 | Macharinic acid lactone | PIK3CA  |
| 21594250 | Macharinic acid lactone | PLA2G7  |
| 21594250 | Macharinic acid lactone | PPIA    |
| 21594250 | Macharinic acid lactone | PSEN2   |
| 21594250 | Macharinic acid lactone | QPCTL   |
| 21594250 | Macharinic acid lactone | RORC    |
| 21594250 | Macharinic acid lactone | SIRT1   |
| 21594250 | Macharinic acid lactone | TNKS    |
| 21594250 | Macharinic acid lactone | TNKS2   |
| 21594250 | Macharinic acid lactone | TUBB1   |
| 21594250 | Macharinic acid lactone | TUBB3   |
| 21594250 | Macharinic acid lactone | TYMS    |
| 21594250 | Macharinic acid lactone | VCAM1   |
| 21594250 | Macharinic acid lactone | XIAP    |
| 5281646  | Macluraxanthone         | PTPN1   |
| 69997336 | Norarmepavine           | ACHE    |
| 69997336 | Norarmepavine           | BCHE    |
| 69997336 | Norarmepavine           | CACNA1C |
| 69997336 | Norarmepavine           | CHRM2   |
| 69997336 | Norarmepavine           | CHRM3   |
| 69997336 | Norarmepavine           | CHRNA2  |
| 69997336 | Norarmepavine           | DRD2    |

|          |               |         |
|----------|---------------|---------|
| 69997336 | Norarmepavine | HTR3A   |
| 69997336 | Norarmepavine | PDE4A   |
| 69997336 | Norarmepavine | SLC18A2 |
| 54670067 | Vitamin C     | ALKBH2  |
| 54670067 | Vitamin C     | ALKBH3  |
| 54670067 | Vitamin C     | BBOX1   |
| 54670067 | Vitamin C     | CACNA1G |
| 54670067 | Vitamin C     | CRTAP   |
| 54670067 | Vitamin C     | DBH     |
| 54670067 | Vitamin C     | EGLN1   |
| 54670067 | Vitamin C     | EGLN2   |
| 54670067 | Vitamin C     | EGLN3   |
| 54670067 | Vitamin C     | FTO     |
| 54670067 | Vitamin C     | GBA3    |
| 54670067 | Vitamin C     | JMJD6   |
| 54670067 | Vitamin C     | KDM5D   |
| 54670067 | Vitamin C     | LCT     |
| 54670067 | Vitamin C     | MAPK7   |
| 54670067 | Vitamin C     | MC3R    |
| 54670067 | Vitamin C     | OGFOD1  |
| 54670067 | Vitamin C     | OGFOD2  |
| 54670067 | Vitamin C     | P3H1    |
| 54670067 | Vitamin C     | P3H2    |
| 54670067 | Vitamin C     | P3H3    |
| 54670067 | Vitamin C     | P4HA1   |
| 54670067 | Vitamin C     | P4HTM   |
| 54670067 | Vitamin C     | PAM     |
| 54670067 | Vitamin C     | PGLYRP2 |
| 54670067 | Vitamin C     | PHYH    |
| 54670067 | Vitamin C     | PLOD1   |
| 54670067 | Vitamin C     | PLOD2   |
| 54670067 | Vitamin C     | PLOD3   |
| 54670067 | Vitamin C     | SLC23A1 |
| 54670067 | Vitamin C     | SLC23A2 |
| 54670067 | Vitamin C     | SLC27A2 |
| 54670067 | Vitamin C     | TMLHE   |
| 12305894 | acacic acid   | ACP1    |
| 12305894 | acacic acid   | AGTR1   |
| 12305894 | acacic acid   | AKR1B10 |
| 12305894 | acacic acid   | AKR1C4  |
| 12305894 | acacic acid   | ALDH2   |
| 12305894 | acacic acid   | ALOX5   |
| 12305894 | acacic acid   | AR      |
| 12305894 | acacic acid   | BACE1   |



|          |             |         |
|----------|-------------|---------|
| 12305894 | acacic acid | CASP3   |
| 12305894 | acacic acid | CD81    |
| 12305894 | acacic acid | CDC25A  |
| 12305894 | acacic acid | CDC25B  |
| 12305894 | acacic acid | CES2    |
| 12305894 | acacic acid | CTSA    |
| 12305894 | acacic acid | CYP17A1 |
| 12305894 | acacic acid | CYP51A1 |
| 12305894 | acacic acid | ESR1    |
| 12305894 | acacic acid | ESR2    |
| 12305894 | acacic acid | FAAH    |
| 12305894 | acacic acid | FABP1   |
| 12305894 | acacic acid | FABP3   |
| 12305894 | acacic acid | FABP4   |
| 12305894 | acacic acid | FABP5   |
| 12305894 | acacic acid | FNTA    |
| 12305894 | acacic acid | G6PD    |
| 12305894 | acacic acid | GPBAR1  |
| 12305894 | acacic acid | HCAR2   |
| 12305894 | acacic acid | HDAC1   |
| 12305894 | acacic acid | HDAC8   |
| 12305894 | acacic acid | HMGCR   |
| 12305894 | acacic acid | HSD11B1 |
| 12305894 | acacic acid | HSD11B2 |
| 12305894 | acacic acid | ITGAV   |
| 12305894 | acacic acid | LTB4R   |
| 12305894 | acacic acid | MCL1    |
| 12305894 | acacic acid | NOS2    |
| 12305894 | acacic acid | NPC1L1  |
| 12305894 | acacic acid | NR1H3   |
| 12305894 | acacic acid | NR3C1   |
| 12305894 | acacic acid | NR3C2   |
| 12305894 | acacic acid | PDE4D   |
| 12305894 | acacic acid | PLA2G1B |
| 12305894 | acacic acid | PLA2G4A |
| 12305894 | acacic acid | POLB    |
| 12305894 | acacic acid | PPARA   |
| 12305894 | acacic acid | PPARD   |
| 12305894 | acacic acid | PPARG   |
| 12305894 | acacic acid | PREP    |
| 12305894 | acacic acid | PRKCH   |
| 12305894 | acacic acid | PTGDR   |
| 12305894 | acacic acid | PTGDR2  |
| 12305894 | acacic acid | PTGER1  |

|          |                     |          |
|----------|---------------------|----------|
| 12305894 | acacic acid         | PTGER2   |
| 12305894 | acacic acid         | PTGER3   |
| 12305894 | acacic acid         | PTGER4   |
| 12305894 | acacic acid         | PTGES    |
| 12305894 | acacic acid         | PTGFR    |
| 12305894 | acacic acid         | PTGIR    |
| 12305894 | acacic acid         | PTGS1    |
| 12305894 | acacic acid         | PTGS2    |
| 12305894 | acacic acid         | PTPN1    |
| 12305894 | acacic acid         | PTPN11   |
| 12305894 | acacic acid         | PTPN2    |
| 12305894 | acacic acid         | PTPN6    |
| 12305894 | acacic acid         | PTPRF    |
| 12305894 | acacic acid         | RORC     |
| 12305894 | acacic acid         | SCD      |
| 12305894 | acacic acid         | SERPINA6 |
| 12305894 | acacic acid         | SHBG     |
| 12305894 | acacic acid         | SIGMAR1  |
| 12305894 | acacic acid         | SLC10A1  |
| 12305894 | acacic acid         | SLC10A2  |
| 12305894 | acacic acid         | STS      |
| 12305894 | acacic acid         | TERT     |
| 12305894 | acacic acid         | THRA     |
| 12305894 | acacic acid         | THRB     |
| 12305894 | acacic acid         | TOP1     |
| 12305894 | acacic acid         | TOP2A    |
| 6712546  | acacic acid lactone | AADA2L2  |
| 6712546  | acacic acid lactone | ABL1     |
| 6712546  | acacic acid lactone | AR       |
| 6712546  | acacic acid lactone | AURKA    |
| 6712546  | acacic acid lactone | AVPR1A   |
| 6712546  | acacic acid lactone | BCL2L1   |
| 6712546  | acacic acid lactone | CCR1     |
| 6712546  | acacic acid lactone | CDK2     |
| 6712546  | acacic acid lactone | CES2     |
| 6712546  | acacic acid lactone | CSF1R    |
| 6712546  | acacic acid lactone | CTRC     |
| 6712546  | acacic acid lactone | CXCR3    |
| 6712546  | acacic acid lactone | CYP17A1  |
| 6712546  | acacic acid lactone | CYP19A1  |
| 6712546  | acacic acid lactone | EPAS1    |
| 6712546  | acacic acid lactone | F2       |
| 6712546  | acacic acid lactone | F2RL1    |
| 6712546  | acacic acid lactone | FNTA     |

|          |                     |         |
|----------|---------------------|---------|
| 6712546  | acacic acid lactone | FNTB    |
| 6712546  | acacic acid lactone | GPR18   |
| 6712546  | acacic acid lactone | HMGCR   |
| 6712546  | acacic acid lactone | HPGDS   |
| 6712546  | acacic acid lactone | HSD11B1 |
| 6712546  | acacic acid lactone | HSD11B2 |
| 6712546  | acacic acid lactone | IKBKB   |
| 6712546  | acacic acid lactone | ITGAL   |
| 6712546  | acacic acid lactone | ITGB2   |
| 6712546  | acacic acid lactone | KCNH2   |
| 6712546  | acacic acid lactone | KIT     |
| 6712546  | acacic acid lactone | LIMK2   |
| 6712546  | acacic acid lactone | MAPK14  |
| 6712546  | acacic acid lactone | MAPK8   |
| 6712546  | acacic acid lactone | MDM2    |
| 6712546  | acacic acid lactone | MTNR1A  |
| 6712546  | acacic acid lactone | MTNR1B  |
| 6712546  | acacic acid lactone | NPPB    |
| 6712546  | acacic acid lactone | NR1H4   |
| 6712546  | acacic acid lactone | NR3C1   |
| 6712546  | acacic acid lactone | NR3C2   |
| 6712546  | acacic acid lactone | PDE10A  |
| 6712546  | acacic acid lactone | PGR     |
| 6712546  | acacic acid lactone | PREP    |
| 6712546  | acacic acid lactone | PRKCA   |
| 6712546  | acacic acid lactone | PRSS1   |
| 6712546  | acacic acid lactone | PTGES   |
| 6712546  | acacic acid lactone | PTGS2   |
| 6712546  | acacic acid lactone | PTPN1   |
| 6712546  | acacic acid lactone | PTPN2   |
| 6712546  | acacic acid lactone | SLC6A2  |
| 6712546  | acacic acid lactone | SLC6A3  |
| 6712546  | acacic acid lactone | TACR1   |
| 6712546  | acacic acid lactone | TACR2   |
| 6712546  | acacic acid lactone | TBXAS1  |
| 6712546  | acacic acid lactone | TERT    |
| 21119850 | AP1                 | ADORA2A |
| 21119850 | AP1                 | ADRB1   |
| 21119850 | AP1                 | ADRB2   |
| 21119850 | AP1                 | ADRB3   |
| 21119850 | AP1                 | AKT1    |
| 21119850 | AP1                 | CDK4    |
| 21119850 | AP1                 | CDK6    |
| 21119850 | AP1                 | DDOST   |

|          |     |          |
|----------|-----|----------|
| 21119850 | AP1 | DRD2     |
| 21119850 | AP1 | DRD3     |
| 21119850 | AP1 | FUCA1    |
| 21119850 | AP1 | GAA      |
| 21119850 | AP1 | GBA      |
| 21119850 | AP1 | GPBAR1   |
| 21119850 | AP1 | HRH3     |
| 21119850 | AP1 | HTR1B    |
| 21119850 | AP1 | HTR2A    |
| 21119850 | AP1 | ITGA2B   |
| 21119850 | AP1 | JAK1     |
| 21119850 | AP1 | JAK2     |
| 21119850 | AP1 | JAK3     |
| 21119850 | AP1 | KCNH2    |
| 21119850 | AP1 | MAPK1    |
| 21119850 | AP1 | MAPKAPK2 |
| 21119850 | AP1 | MET      |
| 21119850 | AP1 | MGAM     |
| 21119850 | AP1 | MTOR     |
| 21119850 | AP1 | NR1H4    |
| 21119850 | AP1 | PDE4B    |
| 21119850 | AP1 | PDE7A    |
| 21119850 | AP1 | PDGFRB   |
| 21119850 | AP1 | PIK3CA   |
| 21119850 | AP1 | PIK3CB   |
| 21119850 | AP1 | PIK3CD   |
| 21119850 | AP1 | PIM1     |
| 21119850 | AP1 | PIM2     |
| 21119850 | AP1 | PIM3     |
| 21119850 | AP1 | PRKDC    |
| 21119850 | AP1 | S1PR1    |
| 21119850 | AP1 | SCN9A    |
| 21119850 | AP1 | SI       |
| 21119850 | AP1 | SLC16A1  |
| 21119850 | AP1 | SPHK1    |
| 21119850 | AP1 | SPHK2    |
| 21119850 | AP1 | SYK      |
| 21119850 | AP1 | TOP1     |
| 21119850 | AP1 | TYK2     |
| 444664   | AP3 | ADORA3   |
| 444664   | AP3 | GCLC     |
| 444664   | AP3 | GRIA1    |
| 444664   | AP3 | GRIA4    |
| 444664   | AP3 | GRIK1    |

|        |                   |         |
|--------|-------------------|---------|
| 444664 | AP3               | GRIK2   |
| 444664 | AP3               | GRIK3   |
| 444664 | AP3               | GRIK5   |
| 444664 | AP3               | GRM2    |
| 444664 | AP3               | GRM3    |
| 444664 | AP3               | GRM6    |
| 444664 | AP3               | GRM8    |
| 444664 | AP3               | LAP3    |
| 444664 | AP3               | SLC1A1  |
| 73309  | Echinocystic acid | ACP1    |
| 73309  | Echinocystic acid | AGTR1   |
| 73309  | Echinocystic acid | AKR1B10 |
| 73309  | Echinocystic acid | ALOX5   |
| 73309  | Echinocystic acid | ALOX5AP |
| 73309  | Echinocystic acid | AR      |
| 73309  | Echinocystic acid | CD81    |
| 73309  | Echinocystic acid | CDC25A  |
| 73309  | Echinocystic acid | CDC25B  |
| 73309  | Echinocystic acid | CES2    |
| 73309  | Echinocystic acid | CYP17A1 |
| 73309  | Echinocystic acid | CYP19A1 |
| 73309  | Echinocystic acid | CYP51A1 |
| 73309  | Echinocystic acid | EDNRA   |
| 73309  | Echinocystic acid | ESR1    |
| 73309  | Echinocystic acid | ESR2    |
| 73309  | Echinocystic acid | FAAH    |
| 73309  | Echinocystic acid | FABP1   |
| 73309  | Echinocystic acid | FABP3   |
| 73309  | Echinocystic acid | FABP4   |
| 73309  | Echinocystic acid | FABP5   |
| 73309  | Echinocystic acid | FFAR1   |
| 73309  | Echinocystic acid | FNTA    |
| 73309  | Echinocystic acid | G6PD    |
| 73309  | Echinocystic acid | GPBAR1  |
| 73309  | Echinocystic acid | GRIK1   |
| 73309  | Echinocystic acid | GRIK2   |
| 73309  | Echinocystic acid | HMGCR   |
| 73309  | Echinocystic acid | HSD11B1 |
| 73309  | Echinocystic acid | HSD11B2 |
| 73309  | Echinocystic acid | LTB4R   |
| 73309  | Echinocystic acid | MDM2    |
| 73309  | Echinocystic acid | MMP1    |
| 73309  | Echinocystic acid | MMP2    |
| 73309  | Echinocystic acid | MMP3    |

|       |                   |          |
|-------|-------------------|----------|
| 73309 | Echinocystic acid | NOS2     |
| 73309 | Echinocystic acid | NPC1L1   |
| 73309 | Echinocystic acid | NR1H3    |
| 73309 | Echinocystic acid | NR1H4    |
| 73309 | Echinocystic acid | NR3C1    |
| 73309 | Echinocystic acid | NR3C2    |
| 73309 | Echinocystic acid | PDE4D    |
| 73309 | Echinocystic acid | PGR      |
| 73309 | Echinocystic acid | PLA2G1B  |
| 73309 | Echinocystic acid | POLA1    |
| 73309 | Echinocystic acid | POLB     |
| 73309 | Echinocystic acid | PPARA    |
| 73309 | Echinocystic acid | PPARD    |
| 73309 | Echinocystic acid | PPARG    |
| 73309 | Echinocystic acid | PREP     |
| 73309 | Echinocystic acid | PRKCH    |
| 73309 | Echinocystic acid | PTGDR    |
| 73309 | Echinocystic acid | PTGDR2   |
| 73309 | Echinocystic acid | PTGER1   |
| 73309 | Echinocystic acid | PTGER2   |
| 73309 | Echinocystic acid | PTGER4   |
| 73309 | Echinocystic acid | PTGES    |
| 73309 | Echinocystic acid | PTGIR    |
| 73309 | Echinocystic acid | PTGS1    |
| 73309 | Echinocystic acid | PTGS2    |
| 73309 | Echinocystic acid | PTPN1    |
| 73309 | Echinocystic acid | PTPN11   |
| 73309 | Echinocystic acid | PTPN2    |
| 73309 | Echinocystic acid | PTPN6    |
| 73309 | Echinocystic acid | PTPRF    |
| 73309 | Echinocystic acid | RORC     |
| 73309 | Echinocystic acid | SCD      |
| 73309 | Echinocystic acid | SERPINA6 |
| 73309 | Echinocystic acid | SHBG     |
| 73309 | Echinocystic acid | SIGMAR1  |
| 73309 | Echinocystic acid | SLC10A1  |
| 73309 | Echinocystic acid | SLC10A2  |
| 73309 | Echinocystic acid | SRD5A2   |
| 73309 | Echinocystic acid | TERT     |
| 73309 | Echinocystic acid | THRA     |
| 73309 | Echinocystic acid | THRB     |
| 73309 | Echinocystic acid | TLR9     |
| 73309 | Echinocystic acid | TOP1     |
| 73309 | Echinocystic acid | TOP2A    |

|        |                                        |         |
|--------|----------------------------------------|---------|
| 73309  | Echinocystic acid                      | TRPM8   |
| 725031 | 2-[(4-Methylphenyl)thio]nicotinic acid | ABCC1   |
| 725031 | 2-[(4-Methylphenyl)thio]nicotinic acid | ACE     |
| 725031 | 2-[(4-Methylphenyl)thio]nicotinic acid | ACE2    |
| 725031 | 2-[(4-Methylphenyl)thio]nicotinic acid | AKR1B1  |
| 725031 | 2-[(4-Methylphenyl)thio]nicotinic acid | AKR1B10 |
| 725031 | 2-[(4-Methylphenyl)thio]nicotinic acid | AKR1C1  |
| 725031 | 2-[(4-Methylphenyl)thio]nicotinic acid | AKR1C2  |
| 725031 | 2-[(4-Methylphenyl)thio]nicotinic acid | AKR1C3  |
| 725031 | 2-[(4-Methylphenyl)thio]nicotinic acid | ALOX5   |
| 725031 | 2-[(4-Methylphenyl)thio]nicotinic acid | APEX1   |
| 725031 | 2-[(4-Methylphenyl)thio]nicotinic acid | CA1     |
| 725031 | 2-[(4-Methylphenyl)thio]nicotinic acid | CA12    |
| 725031 | 2-[(4-Methylphenyl)thio]nicotinic acid | CA9     |
| 725031 | 2-[(4-Methylphenyl)thio]nicotinic acid | CASP1   |
| 725031 | 2-[(4-Methylphenyl)thio]nicotinic acid | CCNC    |
| 725031 | 2-[(4-Methylphenyl)thio]nicotinic acid | CCR2    |
| 725031 | 2-[(4-Methylphenyl)thio]nicotinic acid | CDK9    |
| 725031 | 2-[(4-Methylphenyl)thio]nicotinic acid | CES1    |
| 725031 | 2-[(4-Methylphenyl)thio]nicotinic acid | CES2    |
| 725031 | 2-[(4-Methylphenyl)thio]nicotinic acid | CHRM1   |
| 725031 | 2-[(4-Methylphenyl)thio]nicotinic acid | CHRNA4  |

|        |                                        |         |
|--------|----------------------------------------|---------|
| 725031 | 2-[(4-Methylphenyl)thio]nicotinic acid | CISD1   |
| 725031 | 2-[(4-Methylphenyl)thio]nicotinic acid | CLK1    |
| 725031 | 2-[(4-Methylphenyl)thio]nicotinic acid | CSNK2A1 |
| 725031 | 2-[(4-Methylphenyl)thio]nicotinic acid | CSNK2A2 |
| 725031 | 2-[(4-Methylphenyl)thio]nicotinic acid | CXCL8   |
| 725031 | 2-[(4-Methylphenyl)thio]nicotinic acid | DAO     |
| 725031 | 2-[(4-Methylphenyl)thio]nicotinic acid | DBF4    |
| 725031 | 2-[(4-Methylphenyl)thio]nicotinic acid | DHODH   |
| 725031 | 2-[(4-Methylphenyl)thio]nicotinic acid | DYRK1A  |
| 725031 | 2-[(4-Methylphenyl)thio]nicotinic acid | ECE1    |
| 725031 | 2-[(4-Methylphenyl)thio]nicotinic acid | EDNRA   |
| 725031 | 2-[(4-Methylphenyl)thio]nicotinic acid | EP300   |
| 725031 | 2-[(4-Methylphenyl)thio]nicotinic acid | EPRS    |
| 725031 | 2-[(4-Methylphenyl)thio]nicotinic acid | ERCC5   |
| 725031 | 2-[(4-Methylphenyl)thio]nicotinic acid | ESR2    |
| 725031 | 2-[(4-Methylphenyl)thio]nicotinic acid | FABP1   |
| 725031 | 2-[(4-Methylphenyl)thio]nicotinic acid | FABP2   |
| 725031 | 2-[(4-Methylphenyl)thio]nicotinic acid | FABP3   |
| 725031 | 2-[(4-Methylphenyl)thio]nicotinic acid | FABP4   |
| 725031 | 2-[(4-Methylphenyl)thio]nicotinic acid | FABP5   |
| 725031 | 2-[(4-Methylphenyl)thio]nicotinic acid | FEN1    |
| 725031 | 2-[(4-Methylphenyl)thio]nicotinic acid | FNTA    |



|        |                                        |          |
|--------|----------------------------------------|----------|
| 725031 | 2-[(4-Methylphenyl)thio]nicotinic acid | FOLH1    |
| 725031 | 2-[(4-Methylphenyl)thio]nicotinic acid | GABRA2   |
| 725031 | 2-[(4-Methylphenyl)thio]nicotinic acid | GSTA1    |
| 725031 | 2-[(4-Methylphenyl)thio]nicotinic acid | GSTP1    |
| 725031 | 2-[(4-Methylphenyl)thio]nicotinic acid | HAO1     |
| 725031 | 2-[(4-Methylphenyl)thio]nicotinic acid | HSP90AA1 |
| 725031 | 2-[(4-Methylphenyl)thio]nicotinic acid | HSPA1A   |
| 725031 | 2-[(4-Methylphenyl)thio]nicotinic acid | ICAM1    |
| 725031 | 2-[(4-Methylphenyl)thio]nicotinic acid | ITGAL    |
| 725031 | 2-[(4-Methylphenyl)thio]nicotinic acid | KDM3A    |
| 725031 | 2-[(4-Methylphenyl)thio]nicotinic acid | KDM4A    |
| 725031 | 2-[(4-Methylphenyl)thio]nicotinic acid | KDM4B    |
| 725031 | 2-[(4-Methylphenyl)thio]nicotinic acid | KDM4C    |
| 725031 | 2-[(4-Methylphenyl)thio]nicotinic acid | KDM4D    |
| 725031 | 2-[(4-Methylphenyl)thio]nicotinic acid | KDM4E    |
| 725031 | 2-[(4-Methylphenyl)thio]nicotinic acid | KDM5A    |
| 725031 | 2-[(4-Methylphenyl)thio]nicotinic acid | KDM5B    |
| 725031 | 2-[(4-Methylphenyl)thio]nicotinic acid | KDM5C    |
| 725031 | 2-[(4-Methylphenyl)thio]nicotinic acid | KDM6B    |
| 725031 | 2-[(4-Methylphenyl)thio]nicotinic acid | KMO      |
| 725031 | 2-[(4-Methylphenyl)thio]nicotinic acid | MAOA     |
| 725031 | 2-[(4-Methylphenyl)thio]nicotinic acid | MAOB     |

|        |                                        |        |
|--------|----------------------------------------|--------|
| 725031 | 2-[(4-Methylphenyl)thio]nicotinic acid | MAP3K8 |
| 725031 | 2-[(4-Methylphenyl)thio]nicotinic acid | MAPK1  |
| 725031 | 2-[(4-Methylphenyl)thio]nicotinic acid | MCL1   |
| 725031 | 2-[(4-Methylphenyl)thio]nicotinic acid | METAP2 |
| 725031 | 2-[(4-Methylphenyl)thio]nicotinic acid | MKNK1  |
| 725031 | 2-[(4-Methylphenyl)thio]nicotinic acid | MKNK2  |
| 725031 | 2-[(4-Methylphenyl)thio]nicotinic acid | MME    |
| 725031 | 2-[(4-Methylphenyl)thio]nicotinic acid | MMP12  |
| 725031 | 2-[(4-Methylphenyl)thio]nicotinic acid | MMP13  |
| 725031 | 2-[(4-Methylphenyl)thio]nicotinic acid | MMP3   |
| 725031 | 2-[(4-Methylphenyl)thio]nicotinic acid | MMP8   |
| 725031 | 2-[(4-Methylphenyl)thio]nicotinic acid | NOTUM  |
| 725031 | 2-[(4-Methylphenyl)thio]nicotinic acid | P4HTM  |
| 725031 | 2-[(4-Methylphenyl)thio]nicotinic acid | PDE10A |
| 725031 | 2-[(4-Methylphenyl)thio]nicotinic acid | PIK3CA |
| 725031 | 2-[(4-Methylphenyl)thio]nicotinic acid | PLEC   |
| 725031 | 2-[(4-Methylphenyl)thio]nicotinic acid | PPARA  |
| 725031 | 2-[(4-Methylphenyl)thio]nicotinic acid | PPARG  |
| 725031 | 2-[(4-Methylphenyl)thio]nicotinic acid | PPP1CA |
| 725031 | 2-[(4-Methylphenyl)thio]nicotinic acid | PTGDR2 |
| 725031 | 2-[(4-Methylphenyl)thio]nicotinic acid | PTGER1 |
| 725031 | 2-[(4-Methylphenyl)thio]nicotinic acid | PTGER4 |

|          |                                        |          |
|----------|----------------------------------------|----------|
| 725031   | 2-[(4-Methylphenyl)thio]nicotinic acid | PTGES    |
| 725031   | 2-[(4-Methylphenyl)thio]nicotinic acid | PTGS1    |
| 725031   | 2-[(4-Methylphenyl)thio]nicotinic acid | PTPRG    |
| 725031   | 2-[(4-Methylphenyl)thio]nicotinic acid | PYGL     |
| 725031   | 2-[(4-Methylphenyl)thio]nicotinic acid | PYGM     |
| 725031   | 2-[(4-Methylphenyl)thio]nicotinic acid | RPA1     |
| 725031   | 2-[(4-Methylphenyl)thio]nicotinic acid | SELE     |
| 725031   | 2-[(4-Methylphenyl)thio]nicotinic acid | SLC22A12 |
| 725031   | 2-[(4-Methylphenyl)thio]nicotinic acid | SLCO1B1  |
| 725031   | 2-[(4-Methylphenyl)thio]nicotinic acid | SORT1    |
| 725031   | 2-[(4-Methylphenyl)thio]nicotinic acid | SRD5A2   |
| 725031   | 2-[(4-Methylphenyl)thio]nicotinic acid | TBXAS1   |
| 725031   | 2-[(4-Methylphenyl)thio]nicotinic acid | TTR      |
| 11453158 | Keratinocyte Differentiation Inducer   | ALDH2    |
| 11453158 | Keratinocyte Differentiation Inducer   | ALOX5AP  |
| 11453158 | Keratinocyte Differentiation Inducer   | APP      |
| 11453158 | Keratinocyte Differentiation Inducer   | ATR      |
| 11453158 | Keratinocyte Differentiation Inducer   | BACE1    |
| 11453158 | Keratinocyte Differentiation Inducer   | BAD      |
| 11453158 | Keratinocyte Differentiation Inducer   | BDKRB1   |
| 11453158 | Keratinocyte Differentiation Inducer   | BLM      |
| 11453158 | Keratinocyte Differentiation Inducer   | C1R      |

|          |                                         |         |
|----------|-----------------------------------------|---------|
| 11453158 | Keratinocyte Differentiation<br>Inducer | CA1     |
| 11453158 | Keratinocyte Differentiation<br>Inducer | CA2     |
| 11453158 | Keratinocyte Differentiation<br>Inducer | CASP3   |
| 11453158 | Keratinocyte Differentiation<br>Inducer | CDC7    |
| 11453158 | Keratinocyte Differentiation<br>Inducer | CDK5R1  |
| 11453158 | Keratinocyte Differentiation<br>Inducer | CDKL1   |
| 11453158 | Keratinocyte Differentiation<br>Inducer | CFD     |
| 11453158 | Keratinocyte Differentiation<br>Inducer | CFTR    |
| 11453158 | Keratinocyte Differentiation<br>Inducer | CLK3    |
| 11453158 | Keratinocyte Differentiation<br>Inducer | CNR1    |
| 11453158 | Keratinocyte Differentiation<br>Inducer | CNR2    |
| 11453158 | Keratinocyte Differentiation<br>Inducer | CXCR2   |
| 11453158 | Keratinocyte Differentiation<br>Inducer | CYP19A1 |
| 11453158 | Keratinocyte Differentiation<br>Inducer | CYP2C9  |
| 11453158 | Keratinocyte Differentiation<br>Inducer | CYP3A4  |
| 11453158 | Keratinocyte Differentiation<br>Inducer | DHODH   |
| 11453158 | Keratinocyte Differentiation<br>Inducer | DUT     |
| 11453158 | Keratinocyte Differentiation<br>Inducer | DYRK2   |
| 11453158 | Keratinocyte Differentiation<br>Inducer | ELANE   |
| 11453158 | Keratinocyte Differentiation<br>Inducer | F2      |
| 11453158 | Keratinocyte Differentiation<br>Inducer | F3      |
| 11453158 | Keratinocyte Differentiation<br>Inducer | FGFR2   |

|          |                                         |         |
|----------|-----------------------------------------|---------|
| 11453158 | Keratinocyte Differentiation<br>Inducer | FKBP1A  |
| 11453158 | Keratinocyte Differentiation<br>Inducer | FPR2    |
| 11453158 | Keratinocyte Differentiation<br>Inducer | GCK     |
| 11453158 | Keratinocyte Differentiation<br>Inducer | GRIN1   |
| 11453158 | Keratinocyte Differentiation<br>Inducer | GRIN2B  |
| 11453158 | Keratinocyte Differentiation<br>Inducer | GRK2    |
| 11453158 | Keratinocyte Differentiation<br>Inducer | GRK3    |
| 11453158 | Keratinocyte Differentiation<br>Inducer | GRK5    |
| 11453158 | Keratinocyte Differentiation<br>Inducer | GRM1    |
| 11453158 | Keratinocyte Differentiation<br>Inducer | HSD11B1 |
| 11453158 | Keratinocyte Differentiation<br>Inducer | HSD17B1 |
| 11453158 | Keratinocyte Differentiation<br>Inducer | HSD17B2 |
| 11453158 | Keratinocyte Differentiation<br>Inducer | IDH1    |
| 11453158 | Keratinocyte Differentiation<br>Inducer | JAK2    |
| 11453158 | Keratinocyte Differentiation<br>Inducer | KCNK3   |
| 11453158 | Keratinocyte Differentiation<br>Inducer | KCNK9   |
| 11453158 | Keratinocyte Differentiation<br>Inducer | KDR     |
| 11453158 | Keratinocyte Differentiation<br>Inducer | KHK     |
| 11453158 | Keratinocyte Differentiation<br>Inducer | LCK     |
| 11453158 | Keratinocyte Differentiation<br>Inducer | LIPG    |
| 11453158 | Keratinocyte Differentiation<br>Inducer | MAPK1   |
| 11453158 | Keratinocyte Differentiation<br>Inducer | MERTK   |

|          |                                         |        |
|----------|-----------------------------------------|--------|
| 11453158 | Keratinocyte Differentiation<br>Inducer | METAP2 |
| 11453158 | Keratinocyte Differentiation<br>Inducer | MGLL   |
| 11453158 | Keratinocyte Differentiation<br>Inducer | MKMK2  |
| 11453158 | Keratinocyte Differentiation<br>Inducer | MTOR   |
| 11453158 | Keratinocyte Differentiation<br>Inducer | NAMPT  |
| 11453158 | Keratinocyte Differentiation<br>Inducer | NOS1   |
| 11453158 | Keratinocyte Differentiation<br>Inducer | NOS2   |
| 11453158 | Keratinocyte Differentiation<br>Inducer | PARP1  |
| 11453158 | Keratinocyte Differentiation<br>Inducer | PDE3B  |
| 11453158 | Keratinocyte Differentiation<br>Inducer | PDE4A  |
| 11453158 | Keratinocyte Differentiation<br>Inducer | PDE4C  |
| 11453158 | Keratinocyte Differentiation<br>Inducer | PDE4D  |
| 11453158 | Keratinocyte Differentiation<br>Inducer | PDE9A  |
| 11453158 | Keratinocyte Differentiation<br>Inducer | PDPK1  |
| 11453158 | Keratinocyte Differentiation<br>Inducer | PGK1   |
| 11453158 | Keratinocyte Differentiation<br>Inducer | PIK3CD |
| 11453158 | Keratinocyte Differentiation<br>Inducer | PIK3R1 |
| 11453158 | Keratinocyte Differentiation<br>Inducer | PIM2   |
| 11453158 | Keratinocyte Differentiation<br>Inducer | PKM    |
| 11453158 | Keratinocyte Differentiation<br>Inducer | PLK3   |
| 11453158 | Keratinocyte Differentiation<br>Inducer | PORCN  |
| 11453158 | Keratinocyte Differentiation<br>Inducer | PPIA   |

|          |                                         |        |
|----------|-----------------------------------------|--------|
| 11453158 | Keratinocyte Differentiation<br>Inducer | PRKACA |
| 11453158 | Keratinocyte Differentiation<br>Inducer | PRKCA  |
| 11453158 | Keratinocyte Differentiation<br>Inducer | PRKCB  |
| 11453158 | Keratinocyte Differentiation<br>Inducer | PRKCQ  |
| 11453158 | Keratinocyte Differentiation<br>Inducer | PRKDC  |
| 11453158 | Keratinocyte Differentiation<br>Inducer | PTGS2  |
| 11453158 | Keratinocyte Differentiation<br>Inducer | PTK2   |
| 11453158 | Keratinocyte Differentiation<br>Inducer | QPCT   |
| 11453158 | Keratinocyte Differentiation<br>Inducer | RGS4   |
| 11453158 | Keratinocyte Differentiation<br>Inducer | ROCK1  |
| 11453158 | Keratinocyte Differentiation<br>Inducer | ROCK2  |
| 11453158 | Keratinocyte Differentiation<br>Inducer | RORC   |
| 11453158 | Keratinocyte Differentiation<br>Inducer | S1PR1  |
| 11453158 | Keratinocyte Differentiation<br>Inducer | S1PR3  |
| 11453158 | Keratinocyte Differentiation<br>Inducer | SCN10A |
| 11453158 | Keratinocyte Differentiation<br>Inducer | SCN2A  |
| 11453158 | Keratinocyte Differentiation<br>Inducer | SFRP1  |
| 11453158 | Keratinocyte Differentiation<br>Inducer | SRC    |
| 11453158 | Keratinocyte Differentiation<br>Inducer | STAT3  |
| 11453158 | Keratinocyte Differentiation<br>Inducer | STK17A |
| 11453158 | Keratinocyte Differentiation<br>Inducer | STK17B |
| 11453158 | Keratinocyte Differentiation<br>Inducer | TBXAS1 |

|          |                                                              |        |
|----------|--------------------------------------------------------------|--------|
| 11453158 | Keratinocyte Differentiation Inducer                         | TGFBR1 |
| 11453158 | Keratinocyte Differentiation Inducer                         | TNIK   |
| 11453158 | Keratinocyte Differentiation Inducer                         | TRPV1  |
| 11453158 | Keratinocyte Differentiation Inducer                         | TSPO   |
| 11453158 | Keratinocyte Differentiation Inducer                         | TUBB1  |
| 131990   | 10-(4-Methylpiperazin-1-yl)pyrido(4,3-b)(1,4)benzothiazepine | ACHE   |
| 131990   | 10-(4-Methylpiperazin-1-yl)pyrido(4,3-b)(1,4)benzothiazepine | ADRA1A |
| 131990   | 10-(4-Methylpiperazin-1-yl)pyrido(4,3-b)(1,4)benzothiazepine | ADRA1B |
| 131990   | 10-(4-Methylpiperazin-1-yl)pyrido(4,3-b)(1,4)benzothiazepine | ADRA1D |
| 131990   | 10-(4-Methylpiperazin-1-yl)pyrido(4,3-b)(1,4)benzothiazepine | ADRA2A |
| 131990   | 10-(4-Methylpiperazin-1-yl)pyrido(4,3-b)(1,4)benzothiazepine | ADRA2B |
| 131990   | 10-(4-Methylpiperazin-1-yl)pyrido(4,3-b)(1,4)benzothiazepine | ADRA2C |
| 131990   | 10-(4-Methylpiperazin-1-yl)pyrido(4,3-b)(1,4)benzothiazepine | ALOX5  |
| 131990   | 10-(4-Methylpiperazin-1-yl)pyrido(4,3-b)(1,4)benzothiazepine | BACE1  |
| 131990   | 10-(4-Methylpiperazin-1-yl)pyrido(4,3-b)(1,4)benzothiazepine | BCHE   |
| 131990   | 10-(4-Methylpiperazin-1-yl)pyrido(4,3-b)(1,4)benzothiazepine | CHRM4  |



|        |                                                              |         |
|--------|--------------------------------------------------------------|---------|
| 131990 | 10-(4-Methylpiperazin-1-yl)pyrido(4,3-b)(1,4)benzothiazepine | DRD1    |
| 131990 | 10-(4-Methylpiperazin-1-yl)pyrido(4,3-b)(1,4)benzothiazepine | DRD2    |
| 131990 | 10-(4-Methylpiperazin-1-yl)pyrido(4,3-b)(1,4)benzothiazepine | DRD3    |
| 131990 | 10-(4-Methylpiperazin-1-yl)pyrido(4,3-b)(1,4)benzothiazepine | DRD4    |
| 131990 | 10-(4-Methylpiperazin-1-yl)pyrido(4,3-b)(1,4)benzothiazepine | H1F0    |
| 131990 | 10-(4-Methylpiperazin-1-yl)pyrido(4,3-b)(1,4)benzothiazepine | HDAC1   |
| 131990 | 10-(4-Methylpiperazin-1-yl)pyrido(4,3-b)(1,4)benzothiazepine | HDAC7   |
| 131990 | 10-(4-Methylpiperazin-1-yl)pyrido(4,3-b)(1,4)benzothiazepine | HRH1    |
| 131990 | 10-(4-Methylpiperazin-1-yl)pyrido(4,3-b)(1,4)benzothiazepine | HRH4    |
| 131990 | 10-(4-Methylpiperazin-1-yl)pyrido(4,3-b)(1,4)benzothiazepine | HSD11B1 |
| 131990 | 10-(4-Methylpiperazin-1-yl)pyrido(4,3-b)(1,4)benzothiazepine | HTR1A   |
| 131990 | 10-(4-Methylpiperazin-1-yl)pyrido(4,3-b)(1,4)benzothiazepine | HTR2A   |
| 131990 | 10-(4-Methylpiperazin-1-yl)pyrido(4,3-b)(1,4)benzothiazepine | HTR2B   |
| 131990 | 10-(4-Methylpiperazin-1-yl)pyrido(4,3-b)(1,4)benzothiazepine | HTR2C   |

|        |                                                              |        |
|--------|--------------------------------------------------------------|--------|
| 131990 | 10-(4-Methylpiperazin-1-yl)pyrido(4,3-b)(1,4)benzothiazepine | HTR6   |
| 131990 | 10-(4-Methylpiperazin-1-yl)pyrido(4,3-b)(1,4)benzothiazepine | HTR7   |
| 131990 | 10-(4-Methylpiperazin-1-yl)pyrido(4,3-b)(1,4)benzothiazepine | JAK1   |
| 131990 | 10-(4-Methylpiperazin-1-yl)pyrido(4,3-b)(1,4)benzothiazepine | JAK2   |
| 131990 | 10-(4-Methylpiperazin-1-yl)pyrido(4,3-b)(1,4)benzothiazepine | JAK3   |
| 131990 | 10-(4-Methylpiperazin-1-yl)pyrido(4,3-b)(1,4)benzothiazepine | MAP4K3 |
| 131990 | 10-(4-Methylpiperazin-1-yl)pyrido(4,3-b)(1,4)benzothiazepine | MAP4K5 |
| 131990 | 10-(4-Methylpiperazin-1-yl)pyrido(4,3-b)(1,4)benzothiazepine | NEK1   |
| 131990 | 10-(4-Methylpiperazin-1-yl)pyrido(4,3-b)(1,4)benzothiazepine | NPY5R  |
| 131990 | 10-(4-Methylpiperazin-1-yl)pyrido(4,3-b)(1,4)benzothiazepine | OPRK1  |
| 131990 | 10-(4-Methylpiperazin-1-yl)pyrido(4,3-b)(1,4)benzothiazepine | PABPC1 |
| 131990 | 10-(4-Methylpiperazin-1-yl)pyrido(4,3-b)(1,4)benzothiazepine | PARP1  |
| 131990 | 10-(4-Methylpiperazin-1-yl)pyrido(4,3-b)(1,4)benzothiazepine | PRKCZ  |
| 131990 | 10-(4-Methylpiperazin-1-yl)pyrido(4,3-b)(1,4)benzothiazepine | PTPN1  |

|        |                                                              |          |
|--------|--------------------------------------------------------------|----------|
| 131990 | 10-(4-Methylpiperazin-1-yl)pyrido(4,3-b)(1,4)benzothiazepine | SIGMAR1  |
| 131990 | 10-(4-Methylpiperazin-1-yl)pyrido(4,3-b)(1,4)benzothiazepine | SRD5A2   |
| 33032  | L-glutamic acid                                              | ADORA3   |
| 33032  | L-glutamic acid                                              | BBOX1    |
| 33032  | L-glutamic acid                                              | GABRA1   |
| 33032  | L-glutamic acid                                              | GABRA2   |
| 33032  | L-glutamic acid                                              | GABRA3   |
| 33032  | L-glutamic acid                                              | GABRR1   |
| 33032  | L-glutamic acid                                              | GRIA1    |
| 33032  | L-glutamic acid                                              | GRIA2    |
| 33032  | L-glutamic acid                                              | GRIA4    |
| 33032  | L-glutamic acid                                              | GRIK1    |
| 33032  | L-glutamic acid                                              | GRIK2    |
| 33032  | L-glutamic acid                                              | GRIK3    |
| 33032  | L-glutamic acid                                              | GRIK5    |
| 33032  | L-glutamic acid                                              | GRM1     |
| 33032  | L-glutamic acid                                              | GRM2     |
| 33032  | L-glutamic acid                                              | GRM3     |
| 33032  | L-glutamic acid                                              | GRM4     |
| 33032  | L-glutamic acid                                              | GRM5     |
| 33032  | L-glutamic acid                                              | GRM6     |
| 33032  | L-glutamic acid                                              | GRM7     |
| 33032  | L-glutamic acid                                              | GRM8     |
| 33032  | L-glutamic acid                                              | SLC1A1   |
| 33032  | L-glutamic acid                                              | SLC1A2   |
| 33032  | L-glutamic acid                                              | SLC22A6  |
| 33032  | L-glutamic acid                                              | SLC6A1   |
| 33032  | L-glutamic acid                                              | SLC6A11  |
| 33032  | L-glutamic acid                                              | SLC6A12  |
| 33032  | L-glutamic acid                                              | SLC6A13  |
| 5960   | l-aspartic acid                                              | EGLN1    |
| 5962   | lysine                                                       | AR       |
| 5962   | lysine                                                       | CACNA2D1 |
| 5962   | lysine                                                       | CPB2     |
| 5962   | lysine                                                       | GRIA1    |
| 5962   | lysine                                                       | GRIA2    |
| 5962   | lysine                                                       | GRIA4    |
| 5962   | lysine                                                       | GRIK1    |
| 5962   | lysine                                                       | GRIK2    |
| 5962   | lysine                                                       | GRIK3    |

|          |              |         |
|----------|--------------|---------|
| 5962     | lysine       | GRIK5   |
| 5962     | lysine       | GRM1    |
| 5962     | lysine       | GRM2    |
| 5962     | lysine       | GRM3    |
| 5962     | lysine       | GRM4    |
| 5962     | lysine       | GRM5    |
| 5962     | lysine       | GRM6    |
| 5962     | lysine       | GRM7    |
| 5962     | lysine       | GRM8    |
| 5962     | lysine       | LTA4H   |
| 5962     | lysine       | ODC1    |
| 5962     | lysine       | PEPD    |
| 5962     | lysine       | PLG     |
| 5962     | lysine       | SHBG    |
| 5962     | lysine       | SLC1A1  |
| 5962     | lysine       | SLC22A6 |
| 205      | DL-Threonine | ABAT    |
| 205      | DL-Threonine | GABBR2  |
| 14729078 | sanjoinenine | ACACB   |
| 14729078 | sanjoinenine | ADRA1A  |
| 14729078 | sanjoinenine | ADRA1B  |
| 14729078 | sanjoinenine | ADRA1D  |
| 14729078 | sanjoinenine | ADRA2A  |
| 14729078 | sanjoinenine | AGTR1   |
| 14729078 | sanjoinenine | AVPR1A  |
| 14729078 | sanjoinenine | AVPR2   |
| 14729078 | sanjoinenine | BCL2    |
| 14729078 | sanjoinenine | BDKRB1  |
| 14729078 | sanjoinenine | BDKRB2  |
| 14729078 | sanjoinenine | BRD2    |
| 14729078 | sanjoinenine | BRD4    |
| 14729078 | sanjoinenine | C5AR1   |
| 14729078 | sanjoinenine | CALCRL  |
| 14729078 | sanjoinenine | CAPN1   |
| 14729078 | sanjoinenine | CDK2    |
| 14729078 | sanjoinenine | CFD     |
| 14729078 | sanjoinenine | CHRM1   |
| 14729078 | sanjoinenine | CHRM3   |
| 14729078 | sanjoinenine | CPT1A   |
| 14729078 | sanjoinenine | CPT2    |
| 14729078 | sanjoinenine | CTRC    |
| 14729078 | sanjoinenine | CTSV    |
| 14729078 | sanjoinenine | CYP19A1 |
| 14729078 | sanjoinenine | DRD1    |

|          |              |          |
|----------|--------------|----------|
| 14729078 | sanjoinenine | EPHX2    |
| 14729078 | sanjoinenine | EZH2     |
| 14729078 | sanjoinenine | F10      |
| 14729078 | sanjoinenine | F2RL1    |
| 14729078 | sanjoinenine | F9       |
| 14729078 | sanjoinenine | FLT3     |
| 14729078 | sanjoinenine | FPR1     |
| 14729078 | sanjoinenine | FPR2     |
| 14729078 | sanjoinenine | GALR1    |
| 14729078 | sanjoinenine | GALR2    |
| 14729078 | sanjoinenine | GRK2     |
| 14729078 | sanjoinenine | HCRTR1   |
| 14729078 | sanjoinenine | HCRTR2   |
| 14729078 | sanjoinenine | HLA-DRB1 |
| 14729078 | sanjoinenine | HRH1     |
| 14729078 | sanjoinenine | HTR1A    |
| 14729078 | sanjoinenine | HTR2B    |
| 14729078 | sanjoinenine | HTR6     |
| 14729078 | sanjoinenine | HTR7     |
| 14729078 | sanjoinenine | IDH1     |
| 14729078 | sanjoinenine | JAK2     |
| 14729078 | sanjoinenine | KCNA5    |
| 14729078 | sanjoinenine | KCNJ11   |
| 14729078 | sanjoinenine | KCNJ5    |
| 14729078 | sanjoinenine | KCNJ6    |
| 14729078 | sanjoinenine | KIF11    |
| 14729078 | sanjoinenine | LGMN     |
| 14729078 | sanjoinenine | MAPK11   |
| 14729078 | sanjoinenine | MAPK14   |
| 14729078 | sanjoinenine | MAPK8    |
| 14729078 | sanjoinenine | MMP8     |
| 14729078 | sanjoinenine | NCOR1    |
| 14729078 | sanjoinenine | NOS2     |
| 14729078 | sanjoinenine | NPY1R    |
| 14729078 | sanjoinenine | NPY5R    |
| 14729078 | sanjoinenine | NR1H4    |
| 14729078 | sanjoinenine | OPRD1    |
| 14729078 | sanjoinenine | OPRK1    |
| 14729078 | sanjoinenine | OPRM1    |
| 14729078 | sanjoinenine | OXTR     |
| 14729078 | sanjoinenine | P2RX7    |
| 14729078 | sanjoinenine | PDE10A   |
| 14729078 | sanjoinenine | PDE11A   |
| 14729078 | sanjoinenine | PDE2A    |

|           |              |         |
|-----------|--------------|---------|
| 14729078  | sanjoinenine | PDE5A   |
| 14729078  | sanjoinenine | PDE9A   |
| 14729078  | sanjoinenine | PDPK1   |
| 14729078  | sanjoinenine | PGGT1B  |
| 14729078  | sanjoinenine | PLA2G7  |
| 14729078  | sanjoinenine | PLAT    |
| 14729078  | sanjoinenine | PPIA    |
| 14729078  | sanjoinenine | PRCP    |
| 14729078  | sanjoinenine | PRLHR   |
| 14729078  | sanjoinenine | PSMB5   |
| 14729078  | sanjoinenine | PTGER1  |
| 14729078  | sanjoinenine | S1PR3   |
| 14729078  | sanjoinenine | SCARB1  |
| 14729078  | sanjoinenine | SCN9A   |
| 14729078  | sanjoinenine | SFRP1   |
| 14729078  | sanjoinenine | SHH     |
| 14729078  | sanjoinenine | SLC10A2 |
| 14729078  | sanjoinenine | SLC6A4  |
| 14729078  | sanjoinenine | SLC6A9  |
| 14729078  | sanjoinenine | SMO     |
| 14729078  | sanjoinenine | SOAT1   |
| 14729078  | sanjoinenine | SYK     |
| 14729078  | sanjoinenine | TACR1   |
| 14729078  | sanjoinenine | TACR3   |
| 14729078  | sanjoinenine | TBK1    |
| 14729078  | sanjoinenine | TBXA2R  |
| 14729078  | sanjoinenine | TERT    |
| 14729078  | sanjoinenine | TGFBR1  |
| 14729078  | sanjoinenine | TRPV1   |
| 14729078  | sanjoinenine | TSPO    |
| 102063083 | zizyphusine  | ABCB1   |
| 102063083 | zizyphusine  | ADAM17  |
| 102063083 | zizyphusine  | ADORA1  |
| 102063083 | zizyphusine  | ADORA2A |
| 102063083 | zizyphusine  | ADORA3  |
| 102063083 | zizyphusine  | ADRA1A  |
| 102063083 | zizyphusine  | ADRA1B  |
| 102063083 | zizyphusine  | ADRA1D  |
| 102063083 | zizyphusine  | ADRA2A  |
| 102063083 | zizyphusine  | ADRA2B  |
| 102063083 | zizyphusine  | ADRA2C  |
| 102063083 | zizyphusine  | ADRB1   |
| 102063083 | zizyphusine  | ADRB2   |
| 102063083 | zizyphusine  | ALK     |

|           |             |          |
|-----------|-------------|----------|
| 102063083 | zizyphusine | ALOX12   |
| 102063083 | zizyphusine | ALOX15   |
| 102063083 | zizyphusine | ANPEP    |
| 102063083 | zizyphusine | AURKA    |
| 102063083 | zizyphusine | AURKB    |
| 102063083 | zizyphusine | CDC25B   |
| 102063083 | zizyphusine | CDK2     |
| 102063083 | zizyphusine | CDK5R1   |
| 102063083 | zizyphusine | CHRNA4   |
| 102063083 | zizyphusine | CLK1     |
| 102063083 | zizyphusine | CLK3     |
| 102063083 | zizyphusine | CMA1     |
| 102063083 | zizyphusine | CSF1R    |
| 102063083 | zizyphusine | CTSB     |
| 102063083 | zizyphusine | CXCR2    |
| 102063083 | zizyphusine | DBF4     |
| 102063083 | zizyphusine | DRD1     |
| 102063083 | zizyphusine | DRD2     |
| 102063083 | zizyphusine | DRD3     |
| 102063083 | zizyphusine | DRD4     |
| 102063083 | zizyphusine | DRD5     |
| 102063083 | zizyphusine | DUSP3    |
| 102063083 | zizyphusine | DYRK1A   |
| 102063083 | zizyphusine | DYRK2    |
| 102063083 | zizyphusine | ERN1     |
| 102063083 | zizyphusine | F10      |
| 102063083 | zizyphusine | FLT3     |
| 102063083 | zizyphusine | FLT4     |
| 102063083 | zizyphusine | GCGR     |
| 102063083 | zizyphusine | GSK3A    |
| 102063083 | zizyphusine | GSK3B    |
| 102063083 | zizyphusine | GUSB     |
| 102063083 | zizyphusine | HRH2     |
| 102063083 | zizyphusine | HSD17B1  |
| 102063083 | zizyphusine | HSD17B2  |
| 102063083 | zizyphusine | HSP90AB1 |
| 102063083 | zizyphusine | HTR1A    |
| 102063083 | zizyphusine | HTR1B    |
| 102063083 | zizyphusine | HTR1D    |
| 102063083 | zizyphusine | HTR2A    |
| 102063083 | zizyphusine | HTR2B    |
| 102063083 | zizyphusine | HTR2C    |
| 102063083 | zizyphusine | HTR5A    |
| 102063083 | zizyphusine | HTR6     |

|           |                 |         |
|-----------|-----------------|---------|
| 102063083 | zizyphusine     | HTR7    |
| 102063083 | zizyphusine     | KCNH2   |
| 102063083 | zizyphusine     | KDR     |
| 102063083 | zizyphusine     | KIT     |
| 102063083 | zizyphusine     | LRRK2   |
| 102063083 | zizyphusine     | MAP2K2  |
| 102063083 | zizyphusine     | MET     |
| 102063083 | zizyphusine     | MIF     |
| 102063083 | zizyphusine     | MMP1    |
| 102063083 | zizyphusine     | MMP12   |
| 102063083 | zizyphusine     | MMP13   |
| 102063083 | zizyphusine     | MMP2    |
| 102063083 | zizyphusine     | MMP3    |
| 102063083 | zizyphusine     | MMP7    |
| 102063083 | zizyphusine     | MMP8    |
| 102063083 | zizyphusine     | MMP9    |
| 102063083 | zizyphusine     | NOS2    |
| 102063083 | zizyphusine     | OPRM1   |
| 102063083 | zizyphusine     | PDE5A   |
| 102063083 | zizyphusine     | PDF     |
| 102063083 | zizyphusine     | PDGFRA  |
| 102063083 | zizyphusine     | PDGFRB  |
| 102063083 | zizyphusine     | PIK3CA  |
| 102063083 | zizyphusine     | PIK3CA  |
| 102063083 | zizyphusine     | PIM1    |
| 102063083 | zizyphusine     | PLA2G7  |
| 102063083 | zizyphusine     | PRKCA   |
| 102063083 | zizyphusine     | PRKCB   |
| 102063083 | zizyphusine     | PSEN2   |
| 102063083 | zizyphusine     | PTPRCAP |
| 102063083 | zizyphusine     | ROCK2   |
| 102063083 | zizyphusine     | RPS6KB1 |
| 102063083 | zizyphusine     | SIGMAR1 |
| 102063083 | zizyphusine     | SLC6A3  |
| 102063083 | zizyphusine     | SLC6A4  |
| 102063083 | zizyphusine     | SYK     |
| 102063083 | zizyphusine     | TGFBR1  |
| 102063083 | zizyphusine     | TH      |
| 102063083 | zizyphusine     | TNKS    |
| 102063083 | zizyphusine     | TNKS2   |
| 102063083 | zizyphusine     | TRPV1   |
| 102063083 | zizyphusine     | TSPO    |
| 12305768  | Alphitolic Acid | ACP1    |
| 12305768  | Alphitolic Acid | AGTR1   |



|          |                 |         |
|----------|-----------------|---------|
| 12305768 | Alphitolic Acid | AKR1B10 |
| 12305768 | Alphitolic Acid | ALOX5AP |
| 12305768 | Alphitolic Acid | AMPD2   |
| 12305768 | Alphitolic Acid | AR      |
| 12305768 | Alphitolic Acid | CDC25A  |
| 12305768 | Alphitolic Acid | CDC25B  |
| 12305768 | Alphitolic Acid | CDC25C  |
| 12305768 | Alphitolic Acid | CES2    |
| 12305768 | Alphitolic Acid | CYP17A1 |
| 12305768 | Alphitolic Acid | CYP19A1 |
| 12305768 | Alphitolic Acid | CYP51A1 |
| 12305768 | Alphitolic Acid | FABP1   |
| 12305768 | Alphitolic Acid | FNTA    |
| 12305768 | Alphitolic Acid | G6PD    |
| 12305768 | Alphitolic Acid | GABBR1  |
| 12305768 | Alphitolic Acid | GPBAR1  |
| 12305768 | Alphitolic Acid | HMGCR   |
| 12305768 | Alphitolic Acid | HSD11B1 |
| 12305768 | Alphitolic Acid | HSD17B3 |
| 12305768 | Alphitolic Acid | ITGB1   |
| 12305768 | Alphitolic Acid | MMP1    |
| 12305768 | Alphitolic Acid | MMP2    |
| 12305768 | Alphitolic Acid | MMP3    |
| 12305768 | Alphitolic Acid | NPC1L1  |
| 12305768 | Alphitolic Acid | NR1H4   |
| 12305768 | Alphitolic Acid | PDE4D   |
| 12305768 | Alphitolic Acid | PLA2G1B |
| 12305768 | Alphitolic Acid | POLB    |
| 12305768 | Alphitolic Acid | PPARA   |
| 12305768 | Alphitolic Acid | PPARD   |
| 12305768 | Alphitolic Acid | PPARG   |
| 12305768 | Alphitolic Acid | PTGER2  |
| 12305768 | Alphitolic Acid | PTGES   |
| 12305768 | Alphitolic Acid | PTGS2   |
| 12305768 | Alphitolic Acid | PTPN1   |
| 12305768 | Alphitolic Acid | PTPN11  |
| 12305768 | Alphitolic Acid | PTPN2   |
| 12305768 | Alphitolic Acid | PTPRF   |
| 12305768 | Alphitolic Acid | RORC    |
| 12305768 | Alphitolic Acid | SAE1    |
| 12305768 | Alphitolic Acid | SCD     |
| 12305768 | Alphitolic Acid | SIGMAR1 |
| 12305768 | Alphitolic Acid | TERT    |
| 12305768 | Alphitolic Acid | TOP1    |

|          |                     |        |
|----------|---------------------|--------|
| 12305768 | Alphitolic Acid     | TOP2A  |
| 12305768 | Alphitolic Acid     | UGT2B7 |
| 12305768 | Alphitolic Acid     | VDR    |
| 197017   | N-Methylasimilobine | CYP2D6 |
| 197017   | N-Methylasimilobine | ABCB1  |
| 197017   | N-Methylasimilobine | ADCY5  |
| 197017   | N-Methylasimilobine | ADORA3 |
| 197017   | N-Methylasimilobine | ADRA1A |
| 197017   | N-Methylasimilobine | ADRA1B |
| 197017   | N-Methylasimilobine | ADRA1D |
| 197017   | N-Methylasimilobine | ADRA2A |
| 197017   | N-Methylasimilobine | ADRA2B |
| 197017   | N-Methylasimilobine | ADRA2C |
| 197017   | N-Methylasimilobine | ADRB1  |
| 197017   | N-Methylasimilobine | ADRB2  |
| 197017   | N-Methylasimilobine | ADRB3  |
| 197017   | N-Methylasimilobine | ALOX12 |
| 197017   | N-Methylasimilobine | ALOX15 |
| 197017   | N-Methylasimilobine | AOC3   |
| 197017   | N-Methylasimilobine | BIRC2  |
| 197017   | N-Methylasimilobine | CCL2   |
| 197017   | N-Methylasimilobine | CDK9   |
| 197017   | N-Methylasimilobine | CHRM1  |
| 197017   | N-Methylasimilobine | CHRM2  |
| 197017   | N-Methylasimilobine | CHRM3  |
| 197017   | N-Methylasimilobine | CHRM4  |
| 197017   | N-Methylasimilobine | CHRNA3 |
| 197017   | N-Methylasimilobine | CHRNA4 |
| 197017   | N-Methylasimilobine | CHRNA4 |
| 197017   | N-Methylasimilobine | CHRNA7 |
| 197017   | N-Methylasimilobine | CHRNB1 |
| 197017   | N-Methylasimilobine | CHRNB3 |
| 197017   | N-Methylasimilobine | CTSC   |
| 197017   | N-Methylasimilobine | CYP1A2 |
| 197017   | N-Methylasimilobine | DPP4   |
| 197017   | N-Methylasimilobine | DPP9   |
| 197017   | N-Methylasimilobine | DRD1   |
| 197017   | N-Methylasimilobine | DRD2   |
| 197017   | N-Methylasimilobine | DRD3   |
| 197017   | N-Methylasimilobine | DRD4   |
| 197017   | N-Methylasimilobine | DRD5   |
| 197017   | N-Methylasimilobine | DYRK2  |
| 197017   | N-Methylasimilobine | EBP    |
| 197017   | N-Methylasimilobine | F3     |

|        |                     |         |
|--------|---------------------|---------|
| 197017 | N-Methylasimilobine | FAP     |
| 197017 | N-Methylasimilobine | FDFT1   |
| 197017 | N-Methylasimilobine | GRIN2A  |
| 197017 | N-Methylasimilobine | HASPIN  |
| 197017 | N-Methylasimilobine | HPGDS   |
| 197017 | N-Methylasimilobine | HRH2    |
| 197017 | N-Methylasimilobine | HRH4    |
| 197017 | N-Methylasimilobine | HTR1A   |
| 197017 | N-Methylasimilobine | HTR1B   |
| 197017 | N-Methylasimilobine | HTR1D   |
| 197017 | N-Methylasimilobine | HTR1E   |
| 197017 | N-Methylasimilobine | HTR1F   |
| 197017 | N-Methylasimilobine | HTR2A   |
| 197017 | N-Methylasimilobine | HTR2B   |
| 197017 | N-Methylasimilobine | HTR2C   |
| 197017 | N-Methylasimilobine | HTR3A   |
| 197017 | N-Methylasimilobine | HTR4    |
| 197017 | N-Methylasimilobine | HTR5A   |
| 197017 | N-Methylasimilobine | HTR6    |
| 197017 | N-Methylasimilobine | HTR7    |
| 197017 | N-Methylasimilobine | IDO1    |
| 197017 | N-Methylasimilobine | KCNH2   |
| 197017 | N-Methylasimilobine | L3MBTL3 |
| 197017 | N-Methylasimilobine | LTA4H   |
| 197017 | N-Methylasimilobine | MAOA    |
| 197017 | N-Methylasimilobine | MAPK8   |
| 197017 | N-Methylasimilobine | MTNR1B  |
| 197017 | N-Methylasimilobine | MYLK    |
| 197017 | N-Methylasimilobine | NOS2    |
| 197017 | N-Methylasimilobine | NR4A1   |
| 197017 | N-Methylasimilobine | OPRD1   |
| 197017 | N-Methylasimilobine | OPRK1   |
| 197017 | N-Methylasimilobine | OPRM1   |
| 197017 | N-Methylasimilobine | PHLPP2  |
| 197017 | N-Methylasimilobine | PKN1    |
| 197017 | N-Methylasimilobine | PKN2    |
| 197017 | N-Methylasimilobine | PRKCE   |
| 197017 | N-Methylasimilobine | PRKX    |
| 197017 | N-Methylasimilobine | PTPRCAP |
| 197017 | N-Methylasimilobine | ROCK1   |
| 197017 | N-Methylasimilobine | ROCK2   |
| 197017 | N-Methylasimilobine | ROCK2   |
| 197017 | N-Methylasimilobine | RPS6KA5 |
| 197017 | N-Methylasimilobine | SCN4A   |



|       |           |         |
|-------|-----------|---------|
| 23335 | Caaverine | FAP     |
| 23335 | Caaverine | FDFT1   |
| 23335 | Caaverine | HASPIN  |
| 23335 | Caaverine | HRH2    |
| 23335 | Caaverine | HRH4    |
| 23335 | Caaverine | HTR1A   |
| 23335 | Caaverine | HTR1B   |
| 23335 | Caaverine | HTR1D   |
| 23335 | Caaverine | HTR1E   |
| 23335 | Caaverine | HTR1F   |
| 23335 | Caaverine | HTR2A   |
| 23335 | Caaverine | HTR2B   |
| 23335 | Caaverine | HTR2C   |
| 23335 | Caaverine | HTR3A   |
| 23335 | Caaverine | HTR4    |
| 23335 | Caaverine | HTR5A   |
| 23335 | Caaverine | HTR6    |
| 23335 | Caaverine | HTR7    |
| 23335 | Caaverine | IDO1    |
| 23335 | Caaverine | IKBKB   |
| 23335 | Caaverine | KCNH2   |
| 23335 | Caaverine | KISS1R  |
| 23335 | Caaverine | LTA4H   |
| 23335 | Caaverine | MAOA    |
| 23335 | Caaverine | MAPK8   |
| 23335 | Caaverine | MYLK    |
| 23335 | Caaverine | NR4A1   |
| 23335 | Caaverine | OPRD1   |
| 23335 | Caaverine | OPRK1   |
| 23335 | Caaverine | OPRM1   |
| 23335 | Caaverine | PHLPP2  |
| 23335 | Caaverine | PIM1    |
| 23335 | Caaverine | PIM2    |
| 23335 | Caaverine | PKN1    |
| 23335 | Caaverine | PKN2    |
| 23335 | Caaverine | PLA2G2A |
| 23335 | Caaverine | PRKCE   |
| 23335 | Caaverine | PRKX    |
| 23335 | Caaverine | PTPRCAP |
| 23335 | Caaverine | QDPR    |
| 23335 | Caaverine | ROCK1   |
| 23335 | Caaverine | ROCK2   |
| 23335 | Caaverine | ROCK2   |
| 23335 | Caaverine | RPS6KA5 |

|          |             |         |
|----------|-------------|---------|
| 23335    | Caaverine   | SCN4A   |
| 23335    | Caaverine   | SIGMAR1 |
| 23335    | Caaverine   | SLC6A3  |
| 23335    | Caaverine   | SLC6A4  |
| 23335    | Caaverine   | TBXA2R  |
| 23335    | Caaverine   | TH      |
| 23335    | Caaverine   | TNKS2   |
| 23335    | Caaverine   | TSPO    |
| 15515703 | Jujubogenin | CYP2D6  |
| 15515703 | Jujubogenin | ABCB1   |
| 15515703 | Jujubogenin | ADCY5   |
| 15515703 | Jujubogenin | ADORA3  |
| 15515703 | Jujubogenin | ADRA1A  |
| 15515703 | Jujubogenin | ADRA1B  |
| 15515703 | Jujubogenin | ADRA1D  |
| 15515703 | Jujubogenin | ADRA2A  |
| 15515703 | Jujubogenin | ADRA2B  |
| 15515703 | Jujubogenin | ADRA2C  |
| 15515703 | Jujubogenin | ADRB1   |
| 15515703 | Jujubogenin | ADRB2   |
| 15515703 | Jujubogenin | ADRB3   |
| 15515703 | Jujubogenin | ALOX12  |
| 15515703 | Jujubogenin | ALOX15  |
| 15515703 | Jujubogenin | AOC3    |
| 15515703 | Jujubogenin | BIRC2   |
| 15515703 | Jujubogenin | CCL2    |
| 15515703 | Jujubogenin | CDK9    |
| 15515703 | Jujubogenin | CHRM1   |
| 15515703 | Jujubogenin | CHRM2   |
| 15515703 | Jujubogenin | CHRM3   |
| 15515703 | Jujubogenin | CHRM4   |
| 15515703 | Jujubogenin | CHRNA3  |
| 15515703 | Jujubogenin | CHRNA4  |
| 15515703 | Jujubogenin | CHRNA4  |
| 15515703 | Jujubogenin | CHRNA7  |
| 15515703 | Jujubogenin | CHRNB1  |
| 15515703 | Jujubogenin | CHRNB3  |
| 15515703 | Jujubogenin | CTSC    |
| 15515703 | Jujubogenin | CYP1A2  |
| 15515703 | Jujubogenin | DPP4    |
| 15515703 | Jujubogenin | DPP9    |
| 15515703 | Jujubogenin | DRD1    |
| 15515703 | Jujubogenin | DRD2    |
| 15515703 | Jujubogenin | DRD3    |

|          |             |         |
|----------|-------------|---------|
| 15515703 | Jujubogenin | DRD4    |
| 15515703 | Jujubogenin | DRD5    |
| 15515703 | Jujubogenin | DYRK2   |
| 15515703 | Jujubogenin | EBP     |
| 15515703 | Jujubogenin | F3      |
| 15515703 | Jujubogenin | FAP     |
| 15515703 | Jujubogenin | FDFT1   |
| 15515703 | Jujubogenin | GRIN2A  |
| 15515703 | Jujubogenin | HASPIN  |
| 15515703 | Jujubogenin | HPGDS   |
| 15515703 | Jujubogenin | HRH2    |
| 15515703 | Jujubogenin | HRH4    |
| 15515703 | Jujubogenin | HTR1A   |
| 15515703 | Jujubogenin | HTR1B   |
| 15515703 | Jujubogenin | HTR1D   |
| 15515703 | Jujubogenin | HTR1E   |
| 15515703 | Jujubogenin | HTR1F   |
| 15515703 | Jujubogenin | HTR2A   |
| 15515703 | Jujubogenin | HTR2B   |
| 15515703 | Jujubogenin | HTR2C   |
| 15515703 | Jujubogenin | HTR3A   |
| 15515703 | Jujubogenin | HTR4    |
| 15515703 | Jujubogenin | HTR5A   |
| 15515703 | Jujubogenin | HTR6    |
| 15515703 | Jujubogenin | HTR7    |
| 15515703 | Jujubogenin | IDO1    |
| 15515703 | Jujubogenin | KCNH2   |
| 15515703 | Jujubogenin | L3MBTL3 |
| 15515703 | Jujubogenin | LTA4H   |
| 15515703 | Jujubogenin | MAOA    |
| 15515703 | Jujubogenin | MAPK8   |
| 15515703 | Jujubogenin | MTNR1B  |
| 15515703 | Jujubogenin | MYLK    |
| 15515703 | Jujubogenin | NOS2    |
| 15515703 | Jujubogenin | NR4A1   |
| 15515703 | Jujubogenin | OPRD1   |
| 15515703 | Jujubogenin | OPRK1   |
| 15515703 | Jujubogenin | OPRM1   |
| 15515703 | Jujubogenin | PHLPP2  |
| 15515703 | Jujubogenin | PKN1    |
| 15515703 | Jujubogenin | PKN2    |
| 15515703 | Jujubogenin | PRKCE   |
| 15515703 | Jujubogenin | PRKX    |
| 15515703 | Jujubogenin | PTPRCAP |

|          |             |         |
|----------|-------------|---------|
| 15515703 | Jujubogenin | ROCK1   |
| 15515703 | Jujubogenin | ROCK2   |
| 15515703 | Jujubogenin | ROCK2   |
| 15515703 | Jujubogenin | RPS6KA5 |
| 15515703 | Jujubogenin | SCN4A   |
| 15515703 | Jujubogenin | SIGMAR1 |
| 15515703 | Jujubogenin | SLC6A3  |
| 15515703 | Jujubogenin | SLC6A4  |
| 15515703 | Jujubogenin | TBXA2R  |
| 15515703 | Jujubogenin | TH      |
| 15515703 | Jujubogenin | TNKS2   |
| 15515703 | Jujubogenin | TSPO    |
| 15515703 | Jujubogenin | XIAP    |
| 3085285  | Juzirine    | ABCG2   |
| 3085285  | Juzirine    | ABL1    |
| 3085285  | Juzirine    | ACHE    |
| 3085285  | Juzirine    | ADORA2B |
| 3085285  | Juzirine    | ADORA3  |
| 3085285  | Juzirine    | ADRA1A  |
| 3085285  | Juzirine    | ADRA1B  |
| 3085285  | Juzirine    | ADRA1D  |
| 3085285  | Juzirine    | AGPAT2  |
| 3085285  | Juzirine    | AHR     |
| 3085285  | Juzirine    | ALOX12  |
| 3085285  | Juzirine    | ALOX15  |
| 3085285  | Juzirine    | ALPL    |
| 3085285  | Juzirine    | BACE1   |
| 3085285  | Juzirine    | CA1     |
| 3085285  | Juzirine    | CA14    |
| 3085285  | Juzirine    | CA5A    |
| 3085285  | Juzirine    | CA5B    |
| 3085285  | Juzirine    | CA6     |
| 3085285  | Juzirine    | CA7     |
| 3085285  | Juzirine    | CA9     |
| 3085285  | Juzirine    | CAPN1   |
| 3085285  | Juzirine    | CASP3   |
| 3085285  | Juzirine    | CASP7   |
| 3085285  | Juzirine    | CDK2    |
| 3085285  | Juzirine    | CDK4    |
| 3085285  | Juzirine    | CHEK1   |
| 3085285  | Juzirine    | CLK1    |
| 3085285  | Juzirine    | CNR2    |
| 3085285  | Juzirine    | CTSD    |
| 3085285  | Juzirine    | CTSS    |



|         |          |          |
|---------|----------|----------|
| 3085285 | Juzirine | CYP24A1  |
| 3085285 | Juzirine | CYP2C19  |
| 3085285 | Juzirine | DNM1     |
| 3085285 | Juzirine | DRD1     |
| 3085285 | Juzirine | DRD2     |
| 3085285 | Juzirine | DRD3     |
| 3085285 | Juzirine | DRD5     |
| 3085285 | Juzirine | DYRK1A   |
| 3085285 | Juzirine | DYRK1B   |
| 3085285 | Juzirine | ELANE    |
| 3085285 | Juzirine | EZR      |
| 3085285 | Juzirine | F3       |
| 3085285 | Juzirine | FLT3     |
| 3085285 | Juzirine | GCGR     |
| 3085285 | Juzirine | GSK3B    |
| 3085285 | Juzirine | HDAC6    |
| 3085285 | Juzirine | HSD17B3  |
| 3085285 | Juzirine | HSP90AA1 |
| 3085285 | Juzirine | HSP90AB1 |
| 3085285 | Juzirine | HTT      |
| 3085285 | Juzirine | IGFBP1   |
| 3085285 | Juzirine | IGFBP2   |
| 3085285 | Juzirine | IGFBP3   |
| 3085285 | Juzirine | IGFBP4   |
| 3085285 | Juzirine | IGFBP5   |
| 3085285 | Juzirine | IGFBP6   |
| 3085285 | Juzirine | ILK      |
| 3085285 | Juzirine | KCNH2    |
| 3085285 | Juzirine | KDM1A    |
| 3085285 | Juzirine | LNPEP    |
| 3085285 | Juzirine | MAPK8    |
| 3085285 | Juzirine | MAPKAPK2 |
| 3085285 | Juzirine | MMP1     |
| 3085285 | Juzirine | MMP13    |
| 3085285 | Juzirine | MMP2     |
| 3085285 | Juzirine | MMP3     |
| 3085285 | Juzirine | MMP8     |
| 3085285 | Juzirine | MMP9     |
| 3085285 | Juzirine | MTOR     |
| 3085285 | Juzirine | NEK1     |
| 3085285 | Juzirine | NOX4     |
| 3085285 | Juzirine | OPRK1    |
| 3085285 | Juzirine | PAK4     |
| 3085285 | Juzirine | PDE10A   |

|         |                  |         |
|---------|------------------|---------|
| 3085285 | Juzirine         | PDE2A   |
| 3085285 | Juzirine         | PDE3A   |
| 3085285 | Juzirine         | PDE3B   |
| 3085285 | Juzirine         | PDE5A   |
| 3085285 | Juzirine         | PDGFRA  |
| 3085285 | Juzirine         | PDGFRB  |
| 3085285 | Juzirine         | PDK1    |
| 3085285 | Juzirine         | PIK3CA  |
| 3085285 | Juzirine         | PIK3CD  |
| 3085285 | Juzirine         | PIK3CG  |
| 3085285 | Juzirine         | PITRM1  |
| 3085285 | Juzirine         | PLA2G7  |
| 3085285 | Juzirine         | PLK1    |
| 3085285 | Juzirine         | PRKCZ   |
| 3085285 | Juzirine         | PTPN1   |
| 3085285 | Juzirine         | RAF1    |
| 3085285 | Juzirine         | RET     |
| 3085285 | Juzirine         | RPS6KA5 |
| 3085285 | Juzirine         | SHBG    |
| 3085285 | Juzirine         | TLR9    |
| 3085285 | Juzirine         | TRPM8   |
| 3085285 | Juzirine         | TTR     |
| 3085285 | Juzirine         | TYMS    |
| 3085285 | Juzirine         | VCP     |
| 3085285 | Juzirine         | WEE1    |
| 161388  | Virgaureagenin G | ACP1    |
| 161388  | Virgaureagenin G | ADAMTS4 |
| 161388  | Virgaureagenin G | AKR1B10 |
| 161388  | Virgaureagenin G | ALOX5   |
| 161388  | Virgaureagenin G | AMPD1   |
| 161388  | Virgaureagenin G | AMPD2   |
| 161388  | Virgaureagenin G | AMPD3   |
| 161388  | Virgaureagenin G | CD81    |
| 161388  | Virgaureagenin G | CDC25A  |
| 161388  | Virgaureagenin G | CDC25B  |
| 161388  | Virgaureagenin G | CES2    |
| 161388  | Virgaureagenin G | CHEK1   |
| 161388  | Virgaureagenin G | CTSA    |
| 161388  | Virgaureagenin G | CYP17A1 |
| 161388  | Virgaureagenin G | CYP19A1 |
| 161388  | Virgaureagenin G | CYP51A1 |
| 161388  | Virgaureagenin G | EDNRA   |
| 161388  | Virgaureagenin G | EDNRB   |
| 161388  | Virgaureagenin G | ESR1    |

|        |                  |         |
|--------|------------------|---------|
| 161388 | Virgaureagenin G | ESR2    |
| 161388 | Virgaureagenin G | FAAH    |
| 161388 | Virgaureagenin G | FABP1   |
| 161388 | Virgaureagenin G | FABP3   |
| 161388 | Virgaureagenin G | FABP4   |
| 161388 | Virgaureagenin G | FABP5   |
| 161388 | Virgaureagenin G | FNTA    |
| 161388 | Virgaureagenin G | FNTB    |
| 161388 | Virgaureagenin G | G6PD    |
| 161388 | Virgaureagenin G | GPBAR1  |
| 161388 | Virgaureagenin G | HMGCR   |
| 161388 | Virgaureagenin G | HSD11B1 |
| 161388 | Virgaureagenin G | HSD11B2 |
| 161388 | Virgaureagenin G | ITGA4   |
| 161388 | Virgaureagenin G | ITGB1   |
| 161388 | Virgaureagenin G | LTB4R   |
| 161388 | Virgaureagenin G | MME     |
| 161388 | Virgaureagenin G | MMP1    |
| 161388 | Virgaureagenin G | MMP2    |
| 161388 | Virgaureagenin G | MMP3    |
| 161388 | Virgaureagenin G | NOS2    |
| 161388 | Virgaureagenin G | NPC1L1  |
| 161388 | Virgaureagenin G | NR1H3   |
| 161388 | Virgaureagenin G | NR3C1   |
| 161388 | Virgaureagenin G | NR3C2   |
| 161388 | Virgaureagenin G | PDE4D   |
| 161388 | Virgaureagenin G | PDE5A   |
| 161388 | Virgaureagenin G | PLA2G1B |
| 161388 | Virgaureagenin G | POLB    |
| 161388 | Virgaureagenin G | PPARA   |
| 161388 | Virgaureagenin G | PPARD   |
| 161388 | Virgaureagenin G | PPARG   |
| 161388 | Virgaureagenin G | PREP    |
| 161388 | Virgaureagenin G | PTGDR2  |
| 161388 | Virgaureagenin G | PTGER1  |
| 161388 | Virgaureagenin G | PTGER2  |
| 161388 | Virgaureagenin G | PTGER4  |
| 161388 | Virgaureagenin G | PTGES   |
| 161388 | Virgaureagenin G | PTGFR   |
| 161388 | Virgaureagenin G | PTGS1   |
| 161388 | Virgaureagenin G | PTGS2   |
| 161388 | Virgaureagenin G | PTPN1   |
| 161388 | Virgaureagenin G | PTPN2   |
| 161388 | Virgaureagenin G | PTPN6   |

|        |                  |          |
|--------|------------------|----------|
| 161388 | Virgaureagenin G | PTPRF    |
| 161388 | Virgaureagenin G | RORC     |
| 161388 | Virgaureagenin G | SERPINA6 |
| 161388 | Virgaureagenin G | SHBG     |
| 161388 | Virgaureagenin G | SIGMAR1  |
| 161388 | Virgaureagenin G | SLC6A3   |
| 161388 | Virgaureagenin G | WEE1     |
