# Supplementary material for: Potential Mechanism of Dingji Fumai Decoction Against Atrial Fibrillation Based on Network Pharmacology, Molecular Docking, and Experimental Verification Integration Strategy
Source: PubMed Central journal article supplement (PMC8631917; doi:10.3389/fcvm.2021.712398), 2021-11-11
Supplement: Table_3.pdf [file Table_3.pdf]

Table S3. Designations and topological parameter of hub genes in the PPI network

| Symbol  | Protein Name                                               | Degr<br>ee | Betweenness<br>ess | Closeness<br>ss |
|---------|------------------------------------------------------------|------------|--------------------|-----------------|
| ALB     | Albumin                                                    | 45         | 1198.18            | 0.66            |
| NOS3    | Nitric oxide synthase, endothelial                         | 38         | 594.76             | 0.60            |
| IL6     | Interleukin-6                                              | 37         | 389.74             | 0.60            |
| VEGFA   | Vascular endothelial growth factor A                       | 34         | 494.72             | 0.57            |
| REN     | Renin                                                      | 34         | 434.06             | 0.59            |
| ACE     | Angiotensin-converting enzyme                              | 33         | 368.88             | 0.57            |
| PTGS2   | Prostaglandin G/H synthase 2                               | 28         | 133.45             | 0.55            |
| CASP3   | Caspase-3                                                  | 27         | 240.61             | 0.55            |
| F2      | Prothrombin                                                | 24         | 155.38             | 0.53            |
| AGTR1   | Type-1 angiotensin II receptor                             | 23         | 113.89             | 0.53            |
| CYP3A4  | Cytochrome P450 3A4                                        | 22         | 353.20             | 0.54            |
| PPARG   | Peroxisome proliferator-activated receptor gamma           | 22         | 194.82             | 0.54            |
| CCND1   | G1/S-specific cyclin-D1                                    | 21         | 476.39             | 0.48            |
| SIRT1   | NAD-dependent protein deacetylase sirtuin-1                | 21         | 263.16             | 0.54            |
| VCAM1   | Vascular cell adhesion protein 1                           | 19         | 32.51              | 0.49            |
| KCNH2   | Potassium voltage-gated channel subfamily H member 2       | 18         | 447.80             | 0.47            |
| CYP2C9  | Cytochrome P450 2C9                                        | 18         | 198.42             | 0.53            |
| HIF1A   | Hypoxia-inducible factor 1-alpha                           | 17         | 32.26              | 0.50            |
| NR3C1   | Glucocorticoid receptor                                    | 17         | 94.37              | 0.52            |
| TGFB1   | Transforming growth factor beta-1 proprotein               | 17         | 49.20              | 0.49            |
| CYP1A1  | Cytochrome P450 1A1                                        | 16         | 92.96              | 0.49            |
| CACNA1C | Voltage-dependent L-type calcium channel subunit alpha-1C  | 16         | 136.21             | 0.43            |
| PLG     | Plasminogen                                                | 16         | 13.41              | 0.48            |
| KCNJ5   | G protein-activated inward rectifier potassium channel 4   | 15         | 258.75             | 0.46            |
| ADRB2   | Beta-2 adrenergic receptor                                 | 15         | 175.15             | 0.51            |
| F3      | Tissue factor                                              | 15         | 19.93              | 0.48            |
| SCN5A   | Sodium channel protein type 5 subunit alpha                | 14         | 46.15              | 0.41            |
| NR1H2   | Nuclear receptor subfamily 1 group I member 2              | 14         | 55.81              | 0.46            |
| SELE    | E-selectin                                                 | 14         | 8.59               | 0.48            |
| SLCO1B1 | Solute carrier organic anion transporter family member 1B1 | 13         | 170.67             | 0.45            |
| MCHR1   | Melanin-concentrating hormone receptor 1                   | 13         | 94.81              | 0.45            |
| CYP2C19 | Cytochrome P450 2C19                                       | 13         | 71.69              | 0.51            |
| IGF1R   | Insulin-like growth factor 1 receptor                      | 12         | 12.86              | 0.47            |
| CYP2D6  | Cytochrome P450 2D6                                        | 12         | 104.40             | 0.50            |
| ESR2    | Estrogen receptor beta                                     | 12         | 37.90              | 0.49            |
| ADRB1   | Beta-1 adrenergic receptor                                 | 12         | 148.71             | 0.48            |
| PLAT    | Tissue-type plasminogen activator                          | 12         | 7.35               | 0.47            |
| KCNA5   | Potassium voltage-gated channel subfamily A member 5       | 11         | 115.65             | 0.43            |
| CYP1A2  | Cytochrome P450 1A2                                        | 11         | 51.77              | 0.47            |
| PPARA   | Peroxisome proliferator-activated receptor alpha           | 11         | 8.80               | 0.48            |

|          |                                                                                |    |        |      |
|----------|--------------------------------------------------------------------------------|----|--------|------|
| HTR1A    | 5-hydroxytryptamine receptor 1A                                                | 11 | 119.74 | 0.45 |
| ADORA1   | Adenosine receptor A1                                                          | 11 | 74.88  | 0.48 |
| CYP11B2  | Cytochrome P450 11B2, mitochondrial                                            | 11 | 153.88 | 0.47 |
| ADRA1B   | Alpha-1B adrenergic receptor                                                   | 11 | 21.52  | 0.45 |
| ADRA2A   | Alpha-2A adrenergic receptor                                                   | 11 | 65.31  | 0.45 |
| CACNA2D1 | Voltage-dependent calcium channel subunit alpha-2/delta-1                      | 10 | 21.48  | 0.39 |
| HCN4     | Potassium/sodium hyperpolarization-activated cyclic nucleotide-gated channel 4 | 10 | 15.57  | 0.38 |
| SCN10A   | Sodium channel protein type 10 subunit alpha                                   | 10 | 196.71 | 0.48 |
| UGT2B7   | UDP-glucuronosyltransferase 2B7                                                | 10 | 7.12   | 0.39 |
| ADRA1A   | Alpha-1A adrenergic receptor                                                   | 10 | 32.43  | 0.45 |
| EDNRA    | Endothelin-1 receptor                                                          | 10 | 9.06   | 0.45 |
| HMGCR    | 3-hydroxy-3-methylglutaryl-coenzyme A reductase                                | 10 | 22.90  | 0.48 |
| KCNN3    | Small conductance calcium-activated potassium channel protein 3                | 9  | 36.25  | 0.39 |
| NR3C2    | Mineralocorticoid receptor                                                     | 9  | 4.23   | 0.46 |
| NPPB     | Natriuretic peptides B                                                         | 9  | 96.75  | 0.48 |
| ADRA2C   | Alpha-2C adrenergic receptor                                                   | 9  | 15.03  | 0.43 |
| ADRA1D   | Alpha-1D adrenergic receptor                                                   | 9  | 1.81   | 0.42 |
| ADRA2B   | Alpha-2B adrenergic receptor                                                   | 9  | 15.03  | 0.43 |
| PTGS1    | Prostaglandin G/H synthase 1                                                   | 8  | 8.15   | 0.46 |
| KCNJ11   | ATP-sensitive inward rectifier potassium channel 11                            | 8  | 118.09 | 0.44 |
| SLC8A1   | Sodium/calcium exchanger 1                                                     | 8  | 25.10  | 0.36 |
| CES1     | Liver carboxylesterase 1                                                       | 8  | 2.64   | 0.43 |
| ADRB3    | Beta-3 adrenergic receptor                                                     | 8  | 29.63  | 0.44 |
| IKBKB    | Inhibitor of nuclear factor kappa-B kinase subunit beta                        | 7  | 1.00   | 0.42 |
| CASP1    | Caspase-1                                                                      | 7  | 1.19   | 0.42 |
| PTK2     | Focal adhesion kinase 1                                                        | 7  | 2.65   | 0.43 |
| CAMK2D   | Calcium/calmodulin-dependent protein kinase type II subunit delta              | 7  | 111.17 | 0.43 |
| HTR1B    | 5-hydroxytryptamine receptor 1B                                                | 7  | 17.56  | 0.39 |
| KCNN2    | Small conductance calcium-activated potassium channel protein 2                | 6  | 0.00   | 0.37 |
| TNNT2    | Troponin T, cardiac muscle                                                     | 6  | 22.94  | 0.38 |
| MAPT     | Microtubule-associated protein tau                                             | 6  | 63.54  | 0.45 |
| F10      | Coagulation factor X                                                           | 6  | 1.93   | 0.42 |
| FGFR1    | Fibroblast growth factor receptor 1                                            | 6  | 53.54  | 0.45 |
| CDK6     | Cyclin-dependent kinase 6                                                      | 5  | 0.00   | 0.40 |
| SCN4A    | Sodium channel protein type 4 subunit alpha                                    | 5  | 0.39   | 0.36 |
| AKR1C1   | Aldo-keto reductase family 1 member C1                                         | 5  | 12.02  | 0.39 |
| SLC47A1  | Multidrug and toxin extrusion protein 1                                        | 4  | 20.59  | 0.36 |
| XPO1     | Exportin-1                                                                     | 4  | 0.27   | 0.39 |
| XDH      | Xanthine dehydrogenase/oxidase                                                 | 4  | 3.45   | 0.44 |

---

|         |                                                      |   |      |      |
|---------|------------------------------------------------------|---|------|------|
| RPS6KA3 | Ribosomal protein S6 kinase alpha-3                  | 3 | 2.88 | 0.35 |
| ATP1A1  | Sodium/potassium-transporting ATPase subunit alpha-1 | 3 | 6.15 | 0.35 |
| FGFR2   | Fibroblast growth factor receptor 2                  | 3 | 0.00 | 0.42 |
| HTR4    | 5-hydroxytryptamine receptor 4                       | 3 | 0.00 | 0.35 |
| SLC22A6 | Solute carrier family 22 member 6                    | 2 | 0.00 | 0.31 |
| THRB    | Thyroid hormone receptor beta                        | 2 | 0.00 | 0.33 |
| THRA    | Thyroid hormone receptor alpha                       | 2 | 0.00 | 0.33 |
| HPSE    | Heparanase                                           | 1 | 0.00 | 0.37 |

---
