# Supplementary material for: Potential Mechanism of Dingji Fumai Decoction Against Atrial Fibrillation Based on Network Pharmacology, Molecular Docking, and Experimental Verification Integration Strategy
Source: PubMed Central journal article supplement (PMC8631917; doi:10.3389/fcvm.2021.712398), 2021-11-11
Supplement: Table_4.pdf [file Table_4.pdf]

Table S4. The results of relevance analysis.

| Symbol   | Description                                                             | Score  | Relationship |
|----------|-------------------------------------------------------------------------|--------|--------------|
| SCN5A    | Sodium Voltage-Gated Channel Alpha Subunit 5                            | 602.66 | Directly     |
| KCNA5    | Potassium Voltage-Gated Channel Subfamily A Member 5                    | 471.03 | Directly     |
| KCNH2    | Potassium Voltage-Gated Channel Subfamily H Member 2                    | 424.92 | Directly     |
| HCN4     | Hyperpolarization Activated Cyclic Nucleotide Gated Potassium Channel 4 | 391.41 | Directly     |
| KCNJ5    | Potassium Inwardly Rectifying Channel Subfamily J Member 5              | 391.41 | Directly     |
| CACNA1C  | Calcium Voltage-Gated Channel Subunit Alpha1 C                          | 391.41 | Directly     |
| CACNA2D1 | Calcium Voltage-Gated Channel Auxiliary Subunit Alpha2delta 1           | 313.82 | Directly     |
| TNNT2    | Troponin T2, Cardiac Type                                               | 276.77 | Directly     |
| F2       | Coagulation Factor II, Thrombin                                         | 233.91 | Directly     |
| CYP2C9   | Cytochrome P450 Family 2 Subfamily C Member 9                           | 221.91 | Directly     |
| NOS3     | Nitric Oxide Synthase 3                                                 | 209.22 | Directly     |
| SCN10A   | Sodium Voltage-Gated Channel Alpha Subunit 10                           | 143.24 | Directly     |
| KCNJ11   | Potassium Inwardly Rectifying Channel Subfamily J Member 11             | 143.24 | Directly     |
| ALB      | Albumin                                                                 | 122.66 | Directly     |
| NPPB     | Natriuretic Peptide B                                                   | 122.66 | Directly     |
| REN      | Renin                                                                   | 116.96 | Directly     |
| ACE      | Angiotensin I Converting Enzyme                                         | 116.96 | Directly     |
| IL6      | Interleukin 6                                                           | 116.96 | Directly     |
| TGFB1    | Transforming Growth Factor Beta 1                                       | 110.95 | Directly     |
| PLAT     | Plasminogen Activator, Tissue Type                                      | 110.95 | Directly     |
| CYP11B2  | Cytochrome P450 Family 11 Subfamily B Member 2                          | 104.61 | Directly     |
| F3       | Coagulation Factor III, Tissue Factor                                   | 104.61 | Directly     |
| PPARG    | Peroxisome Proliferator Activated Receptor Gamma                        | 104.61 | Directly     |
| AGTR1    | Angiotensin II Receptor Type 1                                          | 104.61 | Directly     |
| F10      | Coagulation Factor X                                                    | 97.85  | Directly     |
| ADORA1   | Adenosine A1 Receptor                                                   | 97.85  | Directly     |
| ADRB1    | Adrenoceptor Beta 1                                                     | 97.85  | Directly     |
| NR3C2    | Nuclear Receptor Subfamily 3 Group C Member 2                           | 97.85  | Directly     |
| HMGCR    | 3-Hydroxy-3-Methylglutaryl-CoA Reductase                                | 97.85  | Directly     |
| KCNN3    | Potassium Calcium-Activated Channel Subfamily N Member 3                | 90.59  | Directly     |
| EDNRA    | Endothelin Receptor Type A                                              | 64.06  | Directly     |
| PLG      | Plasminogen                                                             | 52.3   | Directly     |
| VEGFA    | Vascular Endothelial Growth Factor A                                    | 52.3   | Directly     |
| CAMK2D   | Calcium/Calmodulin Dependent Protein Kinase II Delta                    | 36.98  | Directly     |
| ADRB3    | Adrenoceptor Beta 3                                                     | 36.98  | Directly     |
| PPARA    | Peroxisome Proliferator Activated Receptor Alpha                        | 36.98  | Directly     |
| CASP1    | Caspase 1                                                               | 36.98  | Directly     |
| ATP1A1   | ATPase Na <sup>+</sup> /K <sup>+</sup> Transporting Subunit Alpha 1     | 36.98  | Directly     |
| ADRA2C   | Adrenoceptor Alpha 2C                                                   | 36.98  | Directly     |
| ADRA1D   | Adrenoceptor Alpha 1D                                                   | 36.98  | Directly     |
| SIRT1    | Sirtuin 1                                                               | 36.98  | Directly     |

---

|        |                                    |       |           |
|--------|------------------------------------|-------|-----------|
| SLC8A1 | Solute Carrier Family 8 Member A1  | 36.98 | Directely |
| MAPT   | Microtubule Associated Protein Tau | 36.98 | Directely |
| CASP3  | Caspase 3                          | 36.98 | Directely |
| VCAM1  | Vascular Cell Adhesion Molecule 1  | 36.98 | Directely |
| ADRB2  | Adrenoceptor Beta 2                | 36.98 | Directely |
| XDH    | Xanthine Dehydrogenase             | 36.98 | Directely |

---

Notes: The score is an indication of the strength of the connection between the gene and the disorders.
