# Supplementary material for: Potential Mechanism of Dingji Fumai Decoction Against Atrial Fibrillation Based on Network Pharmacology, Molecular Docking, and Experimental Verification Integration Strategy
Source: PubMed Central journal article supplement (PMC8631917; doi:10.3389/fcvm.2021.712398), 2021-11-11
Supplement: Table_5.pdf [file Table_5.pdf]

Table S5. The details of corresponding proteins in molecular docking.

| Gene Symbol | Protein                                              | PDB ID |
|-------------|------------------------------------------------------|--------|
| NOS3        | Nitric oxide synthase, endothelial                   | 1M9J   |
| ACE         | Angiotensin-converting enzyme                        | 1O86   |
| SIRT1       | NAD-dependent protein deacetylase sirtuin-1          | 4IG9   |
| IL6         | Interleukin-6                                        | 1ALU   |
| VCAM1       | Vascular cell adhesion protein 1                     | 1IJ9   |
| KCNH2       | Potassium voltage-gated channel subfamily H member 2 | 1BYW   |
